# Supplementary material for: Tunable vicinal, geminal diphosphorylation and C–N bond phosphorylation of enaminones toward divergent phosphorylated ketone derivatives
Source: Royal Society of Chemistry journal article supplement (doi:10.1039/d3cc01427d), 2023-01-01
Supplement: d3cc01427d1.pdf [file d3cc01427d1.pdf]

**Tunable vicinal, geminal diphosphorylation and C-N bond  
phosphorylation of enamines toward divergent phosphorylated  
ketone derivatives**

Dingsheng Cao,<sup>a</sup> Chaoli Wang,<sup>a</sup> Jie-Ping Wan,<sup>a</sup> Chengping Wen,<sup>b,\*</sup> Yunyun Liu<sup>a,\*</sup>

<sup>a</sup>National Engineering Research Center for Carbohydrate Synthesis, College of Chemistry and Chemical Engineering, Jiangxi Normal University, Nanchang 330022, China.

<sup>b</sup>Institute of Basic Research in Clinical Medicine, College of Basic Medical Science, Zhejiang Chinese Medical University, Hangzhou, China.

**Email:** chemliuyunyun@jxnu.edu.cn; wengcp@yeah.net

**Contents**

|                                                                              |          |
|------------------------------------------------------------------------------|----------|
| General experimental information.....                                        | S2       |
| Data of optimization on selective reactions.....                             | S2-S4    |
| Deuterium isotope labelling experiments.....                                 | S5-S7    |
| General procedure for the synthesis of <b>3</b> .....                        | S7       |
| Procedure for the 1 mmol scale reaction for the synthesis of <b>3a</b> ..... | S8       |
| Characterization data of compounds <b>3</b> .....                            | S8-S25   |
| General procedure for the synthesis of <b>4</b> .....                        | S15      |
| Procedure for the 1 mmol scale reaction for the synthesis of <b>4a</b> ..... | S16      |
| Characterization data of compounds <b>4</b> .....                            | S16-S24  |
| General procedure for the synthesis of <b>3</b> .....                        | S24      |
| Procedure for the 1 mmol scale reaction for the synthesis of <b>5a</b> ..... | S24-S25  |
| Characterization data of compounds <b>5</b> .....                            | S25-S30  |
| Synthetic procedure and characterization data of compound <b>7</b> .....     | S30-S31  |
| Synthetic procedure and characterization data of compound <b>8</b> .....     | S31-S32  |
| Synthetic procedure and characterization data of compound <b>10</b> .....    | S32-S33  |
| Synthetic procedure and characterization data of compound <b>12</b> .....    | S33      |
| References.....                                                              | S33      |
| NMR spectra of all products.....                                             | S34-S116 |

## General experimental information

All enaminones **1** were synthesized following literature process.<sup>1</sup> All other chemicals and solvents used in the experiments were obtained from commercial sources and used directly without further treatment. The NMR spectra were recorded in 400 MHz apparatus in DMSO-*d*<sub>6</sub> or CDCl<sub>3</sub>. The frequencies for <sup>1</sup>H NMR, <sup>13</sup>C NMR, <sup>31</sup>P NMR and <sup>19</sup>F NMR test are 400 MHz, 100 MHz, 162 MHz and 376 MHz, respectively. The chemical shifts were reported in ppm with TMS as internal standard. Melting points were tested in X-4A instrument without correcting temperature and the HRMS data for all new products were obtained under ESI model with TOF analyzer.

**Table S1** Optimization on the conditions for the geminal diphosphorylation<sup>a</sup>

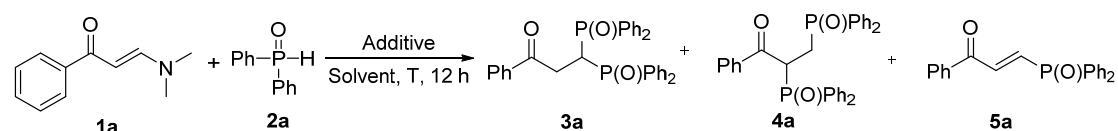

| Entry           | Promoter          | Solvent | T (°C) | Yield ( <b>3a/4a/5a</b> %) <sup>b</sup> |
|-----------------|-------------------|---------|--------|-----------------------------------------|
| 1               | -                 | MeCN    | 50     | 17/0/0                                  |
| 2               | TMSCl             | MeCN    | 50     | 63/trace/0                              |
| 3               | AcOH              | MeCN    | 50     | 39/trace/0                              |
| 4               | KHSO <sub>4</sub> | MeCN    | 50     | 75/trace/0                              |
| 5               | TFA               | MeCN    | 50     | 80/0/0                                  |
| 6               | TFA               | EtOH    | 50     | 75/0/0                                  |
| 7               | TFA               | THF     | 50     | 78/0/0                                  |
| 8               | TFA               | DMF     | 50     | 69/0/trace                              |
| 9               | TFA               | DMSO    | 50     | 78/0/0                                  |
| 10              | TFA               | DCM     | 50     | 76/0/0                                  |
| 11              | TFA               | toluene | 50     | 77/0/0                                  |
| 12 <sup>c</sup> | TFA               | MeCN    | 50     | 87/0/0                                  |
| 13 <sup>d</sup> | TFA               | MeCN    | 50     | 85/0/0                                  |
| 14 <sup>c</sup> | TFA               | MeCN    | 60     | 91/0/0                                  |
| 15 <sup>c</sup> | TFA               | MeCN    | 70     | 90/0/0                                  |

<sup>a</sup>General conditions: **1a** (0.2 mmol), **2a** (3.0 equiv), promoter (2.0 equiv), solvent (2 mL), stirred at 60 °C for 12 h. <sup>b</sup>Isolated yields based on **1a**. <sup>c</sup>With 3.0 equiv TFA. <sup>d</sup>With

4.0 equiv TFA.

**Table S2** Optimization data for the selective vicinal diphosphorylation<sup>a</sup>

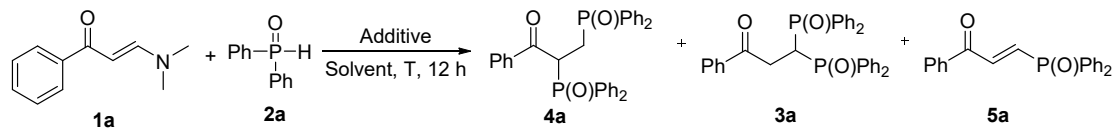

| Entry           | base                            | Solvent       | T (°C) | Yield ( <b>3a/4a/5a</b> %) <sup>b</sup> |
|-----------------|---------------------------------|---------------|--------|-----------------------------------------|
| 1               | Cs <sub>2</sub> CO <sub>3</sub> | MeCN          | 60     | 52/10/0                                 |
| 2               | <sup>t</sup> BuONa              | MeCN          | 60     | 55/5/0                                  |
| 3               | <sup>t</sup> BuOK               | MeCN          | 60     | 60/5/0                                  |
| 4               | TBAH                            | MeCN          | 60     | 20/50/0                                 |
| 5               | NH <sub>2</sub> Na              | MeCN          | 60     | trace /20/0                             |
| 6               | <sup>t</sup> BuOK               | THF           | 60     | 50/trace/0                              |
| 7               | <sup>t</sup> BuOK               | DCM           | 60     | 10/10/0                                 |
| 8               | <sup>t</sup> BuOK               | DMSO          | 60     | 50/5/0                                  |
| 9               | <sup>t</sup> BuOK               | toluene       | 60     | 40/5/0                                  |
| 10              | <sup>t</sup> BuOK               | DCM/DMF (1:1) | 60     | 55/trace /0                             |
| 11              | <sup>t</sup> BuOK               | DMF/THF (1:1) | 60     | 66/trace/0                              |
| 12              | <sup>t</sup> BuOK               | DMF/THF (1:3) | 60     | 72/trace/0                              |
| 13              | <sup>t</sup> BuOK               | DMF/THF (1:3) | 50     | 85/trace/0                              |
| 14              | <sup>t</sup> BuOK               | DMF/THF (1:3) | 70     | 70/trace/0                              |
| 15 <sup>c</sup> | <sup>t</sup> BuOK               | DMF/THF (1:3) | 50     | 90/trace/0                              |

<sup>a</sup>General conditions: **1a** (0.2 mmol), **2a** (4.0 equiv), base (3.0 equiv), solvent (4 mL), stirred for 12 h. <sup>b</sup>Isolated yield. <sup>c</sup>With 4.0 equiv <sup>t</sup>BuOK.

**Table S3** Optimization data for the C-N bond phosphorylation<sup>a</sup>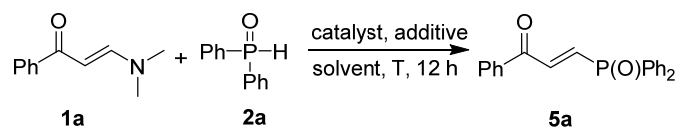

| Entry | Solvent | Catalyst              | Additive          | T (°C) | Yield ( <b>3a/4a/5a</b> %) <sup>b</sup> |
|-------|---------|-----------------------|-------------------|--------|-----------------------------------------|
| 1     | MeCN    | I <sub>2</sub>        | oxalic acid       | 50     | 40/0/10                                 |
| 2     | DCM     | I <sub>2</sub>        | oxalic acid       | 50     | 30/0/20                                 |
| 3     | DMSO    | I <sub>2</sub>        | oxalic acid       | 50     | 35/0/trace                              |
| 4     | acetone | I <sub>2</sub>        | oxalic acid       | 50     | 20/0/15                                 |
| 5     | DMF     | I <sub>2</sub>        | oxalic acid       | 50     | 25/0/35                                 |
| 6     | DMF     | I <sub>2</sub>        | TFA               | 50     | 50/0/trace                              |
| 7     | DMF     | I <sub>2</sub>        | AcOH              | 50     | 20/0/55                                 |
| 8     | DMF     |                       | AcOH              | 50     |                                         |
|       | DMF     | I <sub>2</sub>        | HCl(aq)           | 50     | 30/0/30                                 |
| 9     | DMF     | I <sub>2</sub>        | AlCl <sub>3</sub> | 50     | 10/0/0                                  |
| 10    | DMF     | NIS                   | AcOH              | 50     | 10/0/trace                              |
| 11    | DMF     | KI                    | AcOH              | 50     | 10/0/trace                              |
| 12    | DMF     | KIO <sub>3</sub>      | AcOH              | 50     | 30/0/5                                  |
| 13    | DMF     | PhI(OAc) <sub>2</sub> | AcOH              | 50     | 0/0/trace                               |
| 14    | DMF     | I <sub>2</sub>        | AcOH              | 60     | 25/0/40                                 |
| 15    | DMF     | I <sub>2</sub>        | AcOH              | 40     | 20/0/45                                 |

<sup>a</sup>General conditions: **1a** (0.2 mmol), **2a** (1.5 equiv), catalyst (0.2 equiv), additive (2.0 equiv), solvent (2 mL), stirred for 12 h. <sup>b</sup>Isolated yield.

## Deuterium isotope labelling experiments

### Procedure for the preparation of D-labelled diphenyl phosphine oxide **2a-d<sub>1</sub>**

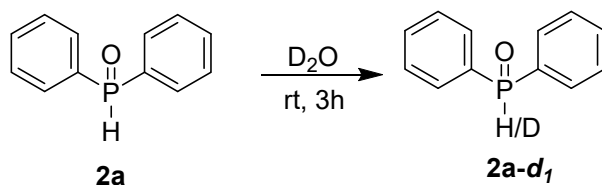

To a 15 mL test tube were added diphenyl phosphine oxide **2a** (3.0mmol), D<sub>2</sub>O (0.6 mL). The mixture was stirred at room temperature for 3 h. Removing the water under reduced pressure provided mixed **2a** and **2a-d<sub>1</sub>** with 97% yield wherein the proportion of D-labelled compound was 81% (Figure S1).

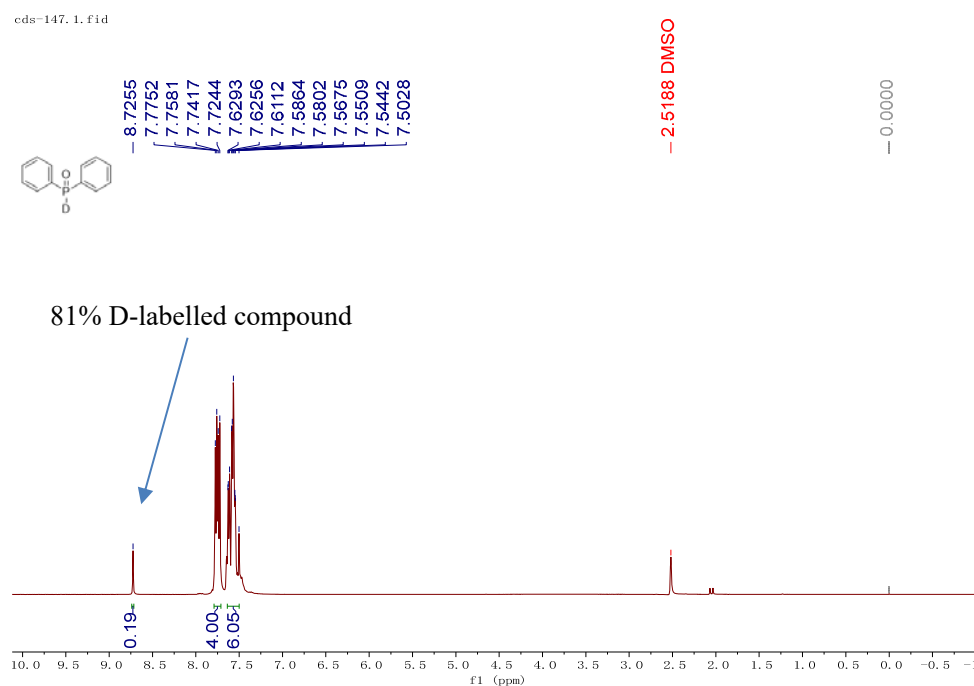

**Figure S1** The <sup>1</sup>H NMR spectrum of mixed **2a** and **2a-d<sub>1</sub>**

## Procedures for the geminal and vicinal dephosphorylation of enaminone 1a with D-labelled diphenyl phosphine oxide

The D-labelling experiments were performed following the standard procedures for the geminal and vicinal diphosphorylation reactions using the prior prepared **2a-d<sub>1</sub>** as substrate. The <sup>1</sup>H NMR spectra for the products resulting from the reaction shows the formation of D-labelled products **3a-d<sub>1</sub>** and **4a-d<sub>1</sub>** in formed of mixture with corresponding product **3a** and **4a**, respectively (Figure S2-Figure S5).

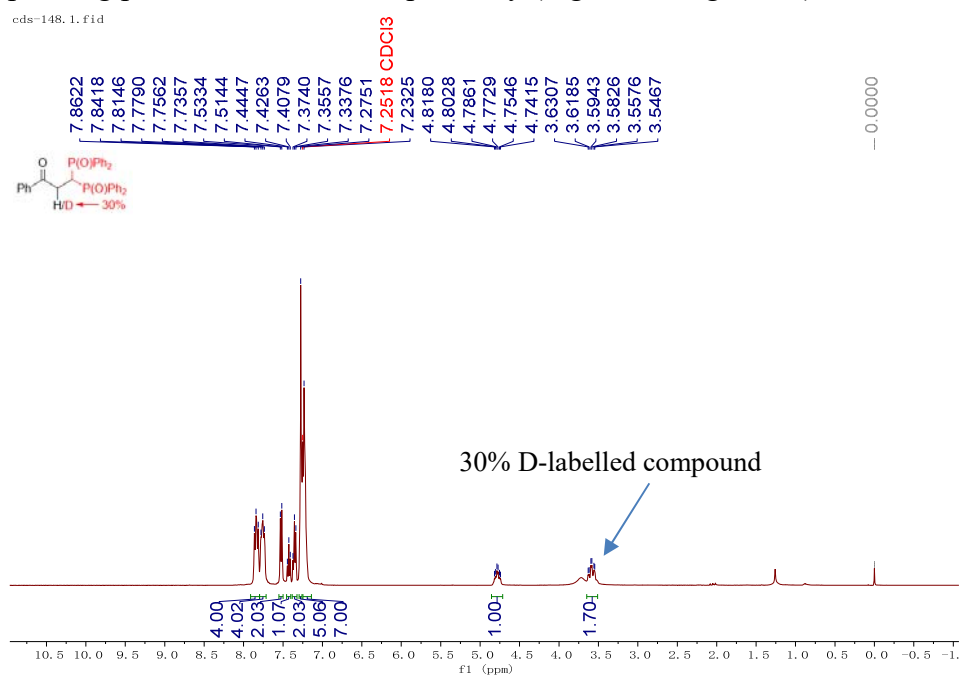

Figure S2 The <sup>1</sup>H NMR spectrum of mixed **3a** and **3a-d<sub>1</sub>**

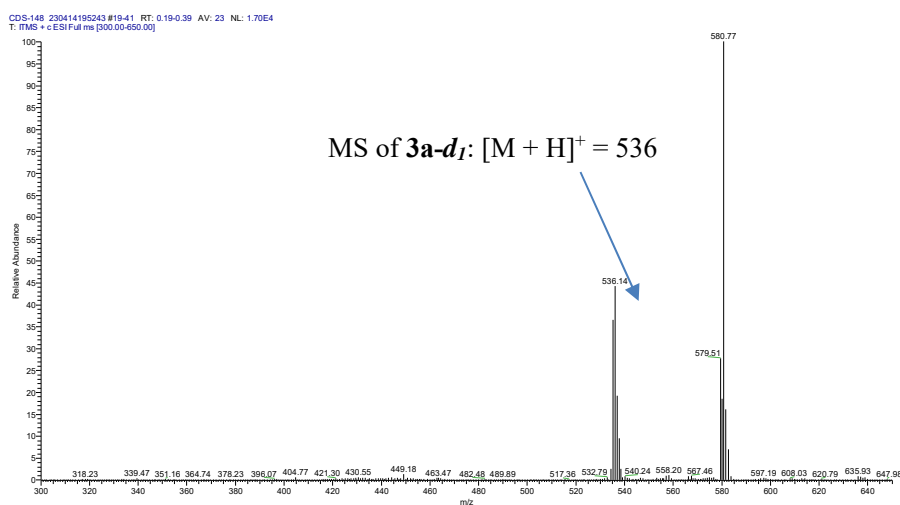

**Figure S3** The ESI-MS spectrum of mixed **3a** and **3a-d<sub>1</sub>**

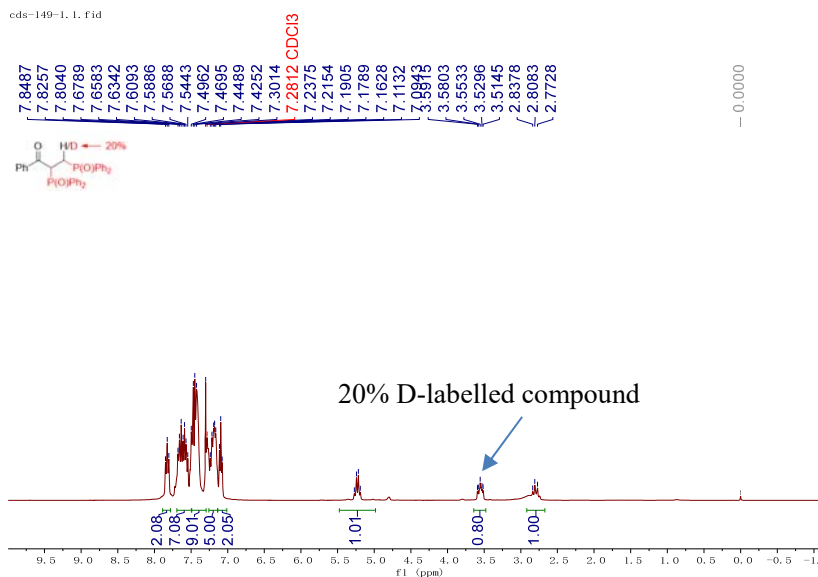

**Figure S4** The <sup>1</sup>H NMR spectrum of mixed **4a** and **4a-d<sub>1</sub>**

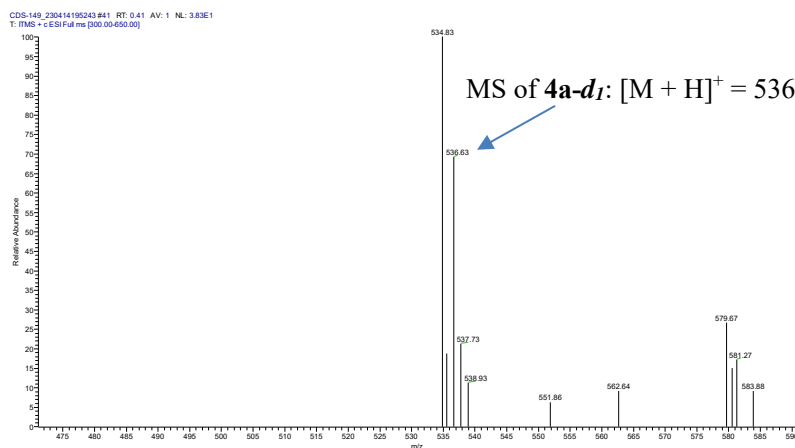

**Figure S5** The ESI-MS spectrum of mixed **4a** and **4a-d<sub>1</sub>**

### General procedure for the synthesis of **3**

In a 25 mL sealed tube were added enaminone **1** (0.2 mmol, 1 equiv), phosphine oxide/phosphonate **2** (0.6 mmol, 3 equiv), TFA (0.6 mmol, 3 equiv) and CH<sub>3</sub>CN (2 mL, 0.1 M). After sealing the tube with Teflon cap, the mixture was stirred at 60 °C with oil bath heating for 12 h. After being cooled down to room temperature, the mixture was transferred into the round bottom flask, and solvent was removed at reduced pressure. The residue obtained therein was subjected to flash silica gel column chromatography

to provide pure products with the elution of mixed ethyl acetate and methanol or dichloromethane (DCM) and methanol (v/v = 10:1~40:1).

### Procedure for the 1 mmol scale reaction for the synthesis of **3a**

In a 50 mL sealed tube were added enaminone **1a** (1.0 mmol, 1 equiv), dialkyl phosphonate **2a** (3.0 mmol, 3 equiv), TFA (3.0 mmol, 3 equiv) and CH<sub>3</sub>CN (6 mL, 0.17 M). After sealing the tube with Teflon cap, the mixture was stirred at 60 °C with oil bath heating for 12 h. After being cooled down to room temperature, the mixture was transferred into the round bottom flask, and solvent was removed at reduced pressure. The residue was dissolved with methanol (2 mL), and water (80 mL) was added dropwise into the mixture while stirring. The precipitates formed thereby were collected by filtration. The solid was washed subsequently with water and then washed by petroleum ether, dried at vacuum to give pure product **3a** (459.4 mg, 86% yield).

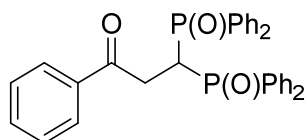

**3,3-Bis(diphenylphosphoryl)-1-phenylpropan-1-one (3a).**<sup>2</sup> Eluent: V<sub>EA</sub>/V<sub>MeOH</sub> = 10:1; White solid (97.6 mg, 91% yield); mp 168-170 °C; <sup>1</sup>H NMR (400 MHz, CDCl<sub>3</sub>) δ 7.88-7.82 (m, 4H), 7.79-7.71 (m, 4H), 7.52 (d, *J* = 7.9 Hz, 2H), 7.42 (t, *J* = 7.3 Hz, 1H), 7.36 (t, *J* = 7.3 Hz, 2H), 7.28 (d, *J* = 4.0 Hz, 5H), 7.22 (s, 7H), 4.83-4.73 (m, 1H), 3.62-3.52 (m, 2H); <sup>13</sup>C NMR (100 MHz, CDCl<sub>3</sub>) δ 195.8 (t, *J* = 4.4 Hz), 135.4, 133.4, 131.8, 131.7, 131.63, 131.58, 131.5, 130.9, 130.6, 128.3, 128.2, 127.8, 36.6 (t, *J* = 59.2 Hz), 34.4; <sup>31</sup>P NMR (162 MHz, CDCl<sub>3</sub>): δ 31.5.

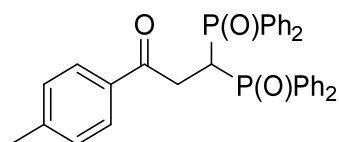

**3,3-Bis(diphenylphosphoryl)-1-(p-tolyl)propan-1-one (3b).** Eluent: V<sub>EA</sub>/V<sub>MeOH</sub> = 10:1; Yellow liquid (89.7 mg, 82% yield); <sup>1</sup>H NMR (400 MHz, CDCl<sub>3</sub>) ; δ 7.88-7.76 (m, 8H), 7.45 (d, *J* = 8.0 Hz, 2H), 7.34-7.30 (m, 2H), 7.23 (d, *J* = 5.2 Hz, 10H), 7.04 (d, *J* = 8.0 Hz, 2H), 4.83-4.76 (m, 1H), 3.66-3.58 (m, 2H), 2.30 (s, 3H); <sup>13</sup>C NMR (100 MHz, CDCl<sub>3</sub>) δ 195.5, 144.3, 132.7, 131.9, 131.7, 131.5, 131.4, 130.4, 130.3, 128.9,



128.4, 128.2, 128.0, 35.6, 34.0, 21.6;  $^{31}\text{P}$  NMR (162 MHz,  $\text{CDCl}_3$ ):  $\delta$  32.6; HRMS (ESI-TOF)  $m/z$ :  $[\text{M} + \text{H}]^+$  Calcd for  $\text{C}_{34}\text{H}_{31}\text{O}_3\text{P}_2$  549.1743; Found 549.1745.

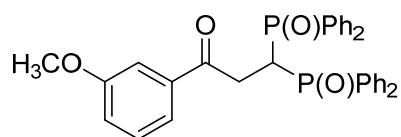

**3,3-Bis(diphenylphosphoryl)-1-(3-methoxyphenyl)propan-1-one (3c).** Eluent:  $V_{\text{EA}}/V_{\text{MeOH}} = 10:1$ ; Yellow liquid (84.5 mg, 75% yield);  $^1\text{H}$  NMR (400 MHz,  $\text{CDCl}_3$ )  $\delta$  7.85-7.77 (m, 8H), 7.32 (t,  $J = 7.1$  Hz, 2H), 7.25 (s, 10H), 7.13 (s, 2H), 7.05 (s, 1H), 6.97 (s, 1H), 4.82-4.73 (m, 1H), 3.8 (s, 3H), 3.70-3.61 (m, 2H);  $^{13}\text{C}$  NMR (100 MHz,  $\text{CDCl}_3$ )  $\delta$  196.1, 159.4, 136.6, 132.0, 131.8, 131.6, 131.5, 129.3, 128.5, 128.4, 128.3, 120.7, 120.1, 111.9, 55.4, 35.3, 34.5;  $^{31}\text{P}$  NMR (162 MHz,  $\text{CDCl}_3$ )  $\delta$  32.6; HRMS (ESI-TOF)  $m/z$ :  $[\text{M} + \text{H}]^+$  Calcd for  $\text{C}_{34}\text{H}_{31}\text{O}_4\text{P}_2$  565.1692; Found 565.1697.

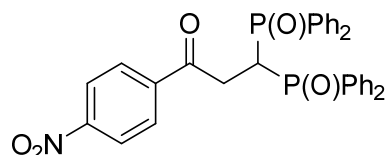

**3,3-Bis(diphenylphosphoryl)-1-(4-nitrophenyl)propan-1-one (3d).** Eluent:  $V_{\text{EA}}/V_{\text{MeOH}} = 10:1$ ; White solid (90.7 mg, 78% yield); mp 188-190  $^\circ\text{C}$ ;  $^1\text{H}$  NMR (400 MHz,  $\text{CDCl}_3$ ) ;  $\delta$  8.12 (d,  $J = 7.0$  Hz, 2H), 7.90-7.80 (m, 4H), 7.80-7.68 (m, 6H), 7.37 (d,  $J = 6.3$  Hz, 2H), 7.26 (s, 10H), 4.74-4.67 (m, 1H), 3.70-3.64 (m, 2H);  $^{13}\text{C}$  NMR (100 MHz,  $\text{CDCl}_3$ )  $\delta$  195.0 (t,  $J = 5.4$  Hz), 150.3, 139.6, 132.1, 131.9, 131.6 (d,  $J = 3.0$  Hz), 131.5 (d,  $J = 3.5$  Hz), 129.0, 128.6, 128.5, 128.4, 128.3, 123.5, 36.6 (d,  $J = 57.6$  Hz), 34.9;  $^{31}\text{P}$  NMR (162 MHz,  $\text{CDCl}_3$ )  $\delta$  31.6; HRMS (ESI-TOF)  $m/z$ :  $[\text{M} + \text{H}]^+$  Calcd for  $\text{C}_{33}\text{H}_{28}\text{NO}_5\text{P}_2$  580.1437; Found 580.1439.

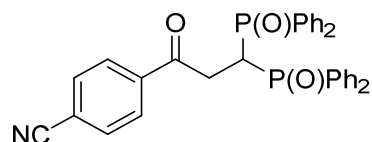

**4-(3,3-Bis(diphenylphosphoryl)propanoyl)benzonitrile (3e).** Eluent:  $V_{\text{EA}}/V_{\text{MeOH}} = 10:1$ ; Yellow liquid (89.3 mg, 80% yield);  $^1\text{H}$  NMR (400 MHz,  $\text{CDCl}_3$ )  $\delta$  7.87-7.72 (m, 8H), 7.69 (d,  $J = 7.9$  Hz, 2H), 7.53 (d,  $J = 7.8$  Hz, 2H), 7.31 (d,  $J = 7.3$  Hz, 3H), 7.27-7.18 (m, 9H), 4.72-4.66 (m, 1H), 3.90-3.63 (m, 2H);  $^{13}\text{C}$  NMR (100 MHz,  $\text{CDCl}_3$ )  $\delta$

195.3 (t,  $J = 4.4$  Hz), 138.0, 132.1, 131.9, 131.52, 131.47, 131.4, 130.9, 129.9, 128.6, 128.5, 128.3, 117.8, 116.5, 36.0 (t,  $J = 59.5$  Hz), 34.4;  $^{31}\text{P}$  NMR (162 MHz,  $\text{CDCl}_3$ )  $\delta$  32.3; HRMS (ESI-TOF)  $m/z$ :  $[\text{M} + \text{H}]^+$  Calcd for  $\text{C}_{34}\text{H}_{28}\text{NO}_3\text{P}_2$  560.1539; Found 560.1537.

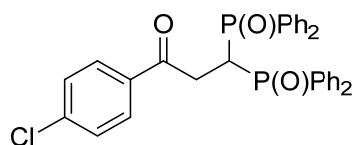

**1-(4-Chlorophenyl)-3,3-bis(diphenylphosphoryl)propan-1-one (3f).** Eluent:  $V_{\text{EA}}/V_{\text{MeOH}} = 10:1$ ; Yellow liquid (77.7 mg, 68% yield);  $^1\text{H}$  NMR (400 MHz,  $\text{CDCl}_3$ )  $\delta$  7.92-7.69 (m, 8H), 7.49 (d,  $J = 8.5$  Hz, 2H), 7.34 (t,  $J = 7.0$  Hz, 2H), 7.29 (s, 2H), 7.26-7.19 (m, 10H), 4.78-4.69 (m, 1H), 3.62-3.54 (m, 2H);  $^{13}\text{C}$  NMR (100 MHz,  $\text{CDCl}_3$ )  $\delta$  194.9 (t,  $J = 4.9$  Hz), 139.9, 133.5, 132.0, 131.8, 131.6, 131.49, 131.47, 129.3, 128.6, 128.5, 128.4, 128.3, 36.2 (t,  $J = 59.2$  Hz), 34.2;  $^{31}\text{P}$  NMR (162 MHz,  $\text{CDCl}_3$ )  $\delta$  31.8; HRMS (ESI-TOF)  $m/z$ :  $[\text{M} + \text{H}]^+$  Calcd for  $\text{C}_{33}\text{H}_{28}\text{ClO}_3\text{P}_2$  569.1197; Found 569.1197.

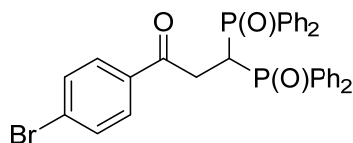

**1-(4-Bromophenyl)-3,3-bis(diphenylphosphoryl)propan-1-one (3g).** Eluent:  $V_{\text{EA}}/V_{\text{MeOH}} = 10:1$ ; White solid (101.3 mg, 83% yield); mp 172-174 °C;  $^1\text{H}$  NMR (400 MHz,  $\text{CDCl}_3$ )  $\delta$  7.84-7.72 (m, 8H), 7.41 (s, 4H), 7.36 (t,  $J = 7.1$  Hz, 2H), 7.27 (d,  $J = 12.9$  Hz, 10H), 4.75-4.68 (m, 1H), 3.59-3.51 (m, 2H);  $^{13}\text{C}$  NMR (100 MHz,  $\text{CDCl}_3$ )  $\delta$  195.1 (t,  $J = 5.0$  Hz), 134.0, 131.9, 131.7, 131.6, 131.4, 130.3, 129.4, 128.6, 128.44, 128.37, 128.3, 128.2, 36.4 (t,  $J = 59.7$  Hz), 34.3;  $^{31}\text{P}$  NMR (162 MHz,  $\text{CDCl}_3$ )  $\delta$  31.7; HRMS (ESI-TOF)  $m/z$ :  $[\text{M} + \text{H}]^+$  Calcd for  $\text{C}_{33}\text{H}_{28}\text{BrO}_3\text{P}_2$  613.0692; Found 613.0696.

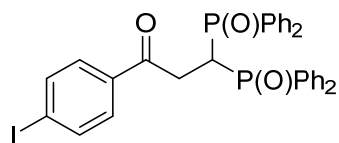

**3,3-Bis(diphenylphosphoryl)-1-(4-iodophenyl)propan-1-one (3h).** Eluent:  $V_{\text{EA}}/V_{\text{MeOH}} = 10:1$ ; White solid (117.9 mg, 89% yield); mp 144-146 °C;  $^1\text{H}$  NMR (400 MHz,  $\text{CDCl}_3$ )  $\delta$  7.88-7.72 (m, 8H), 7.58 (d,  $J = 8.0$  Hz, 2H), 7.35-7.27 (m, 4H), 7.24 (s,

10H), 4.76-4.69 (m, 1H), 3.66-3.58 (m, 2H);  $^{13}\text{C}$  NMR (100 MHz,  $\text{CDCl}_3$ )  $\delta$  195.5, 137.5, 134.4, 132.1, 131.8, 131.5, 131.4, 130.1, 129.3, 128.6, 128.44, 128.39, 128.3, 35.7, 34.1;  $^{31}\text{P}$  NMR (162 MHz,  $\text{CDCl}_3$ )  $\delta$  32.4; HRMS (ESI-TOF)  $m/z$ :  $[\text{M} + \text{H}]^+$  Calcd for  $\text{C}_{33}\text{H}_{28}\text{IO}_3\text{P}_2$  661.0553; Found 661.0553.

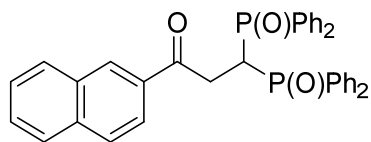

**3,3-Bis(diphenylphosphoryl)-1-(naphthalen-2-yl)propan-1-one (3i).** Eluent:  $V_{\text{EA}}/V_{\text{MeOH}} = 10:1$ ; Yellow liquid (95.5 mg, 82% yield);  $^1\text{H}$  NMR (400 MHz,  $\text{CDCl}_3$ ) ;  $\delta$  8.09 (s, 1H), 7.88-7.75 (m, 10H), 7.69 (d,  $J = 8.6$  Hz, 1H), 7.62 (d,  $J = 8.4$  Hz, 1H), 7.54 (t,  $J = 7.3$  Hz, 1H), 7.48 (t,  $J = 7.3$  Hz, 1H), 7.33 (t,  $J = 7.2$  Hz, 2H), 7.26-7.11 (m, 9H), 4.89-4.80 (m, 1H), 3.84-3.75 (m, 2H);  $^{13}\text{C}$  NMR (100 MHz,  $\text{CDCl}_3$ )  $\delta$  196.0, 135.6, 132.5, 132.1, 132.0, 131.8, 131.6, 131.52, 131.48, 130.1, 129.8, 128.7, 128.5, 128.4, 128.3, 128.0, 127.5, 126.7, 123.3, 41.8, 34.3;  $^{31}\text{P}$  NMR (162 MHz,  $\text{CDCl}_3$ )  $\delta$  32.5; HRMS (ESI-TOF)  $m/z$ :  $[\text{M} + \text{H}]^+$  Calcd for  $\text{C}_{37}\text{H}_{31}\text{O}_3\text{P}_2$  585.1743; Found 585.1749.

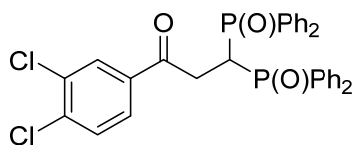

**1-(3,4-Dichlorophenyl)-3,3-bis(diphenylphosphoryl)propan-1-one (3j).** Eluent:  $V_{\text{EA}}/V_{\text{MeOH}} = 10:1$ ; Yellow liquid (110.1 mg, 91% yield);  $^1\text{H}$  NMR (400 MHz,  $\text{CDCl}_3$ )  $\delta$  7.78 (t,  $J = 16.3$  Hz, 8H), 7.57 (s, 1H), 7.44 (d,  $J = 8.1$  Hz, 1H), 7.33-7.27 (m, 6H), 7.25-7.23 (m, 7H), 4.72-4.63 (m, 1H), 3.65-5.56 (m, 2H);  $^{13}\text{C}$  NMR (100 MHz,  $\text{CDCl}_3$ )  $\delta$  194.4, 138.0, 134.8, 132.9, 132.0, 131.8, 131.6, 131.5, 131.1, 130.4, 129.7, 128.6, 128.4, 128.3, 127.2, 36.3, 34.3;  $^{31}\text{P}$  NMR (162 MHz,  $\text{CDCl}_3$ )  $\delta$  32.1; HRMS (ESI-TOF)  $m/z$ :  $[\text{M} + \text{H}]^+$  Calcd for  $\text{C}_{33}\text{H}_{27}\text{Cl}_2\text{O}_3\text{P}_2$  603.0807; Found 603.0806.

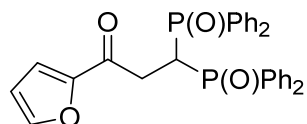

**3,3-Bis(diphenylphosphoryl)-1-(furan-2-yl)propan-1-one (3k).** Eluent:  $V_{\text{EA}}/V_{\text{MeOH}} = 10:1$ ; Black liquid (79.0 mg, 75% yield);  $^1\text{H}$  NMR (400 MHz,  $\text{CDCl}_3$ )  $\delta$  7.83-7.73 (m,

8H), 7.36-7.28 (m, 4H), 7.22 (d,  $J = 6.8$  Hz, 9H), 6.93 (s, 1H), 6.29 (s, 1H), 4.69-4.60 (m, 1H), 3.54-3.45 (m, 2H);  $^{13}\text{C}$  NMR (100 MHz,  $\text{CDCl}_3$ )  $\delta$  184.5 (t,  $J = 5.3$  Hz), 150.9, 146.8, 131.9, 131.7, 131.6, 131.5, 131.4, 128.5, 128.3, 128.2, 118.6, 112.1, 35.3 (t,  $J = 59.4$  Hz), 33.7;  $^{31}\text{P}$  NMR (162 MHz,  $\text{CDCl}_3$ )  $\delta$  32.2; HRMS (ESI-TOF)  $m/z$ :  $[\text{M} + \text{H}]^+$  Calcd for  $\text{C}_{31}\text{H}_{27}\text{O}_4\text{P}_2$  525.1379; Found 525.1378.

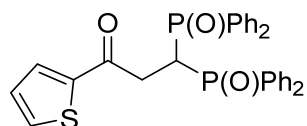

**3,3-Bis(diphenylphosphoryl)-1-(thiophen-2-yl)propan-1-one (31).** Eluent:  $V_{\text{EA}}/V_{\text{MeOH}} = 10:1$ ; Yellow liquid (84.6 mg, 78% yield);  $^1\text{H}$  NMR (400 MHz,  $\text{CDCl}_3$ )  $\delta$  8.07-7.70 (m, 9H), 7.47 (s, 1H), 7.33 (d,  $J = 22.6$  Hz, 4H), 7.23 (s, 8H), 6.83 (s, 1H), 4.75-4.67 (m, 1H), 3.62-3.53 (m, 2H);  $^{13}\text{C}$  NMR (100 MHz,  $\text{CDCl}_3$ )  $\delta$  188.8 (t,  $J = 4.7$  Hz), 141.8, 134.4, 133.1, 131.9, 131.7, 131.5, 130.3, 128.5, 128.4, 128.3, 128.2, 127.9, 35.8 (t,  $J = 59.8$  Hz), 34.4;  $^{31}\text{P}$  NMR (162 MHz,  $\text{CDCl}_3$ )  $\delta$  31.8; HRMS (ESI-TOF)  $m/z$ :  $[\text{M} + \text{H}]^+$  Calcd for  $\text{C}_{31}\text{H}_{27}\text{O}_3\text{P}_2\text{S}$  541.1151; Found 541.1152.

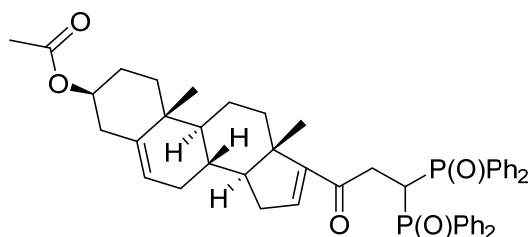

**(3S, 8R, 9S, 10R, 13S, 14S)-17-(3,3-Bis(diphenylphosphoryl)propanoyl)-10,13-dimethyl-2, 3, 4, 7, 8, 9, 10, 11, 12, 13, 14, 15-dodecahydro-1H-cyclopenta[a]phenanthren-3-yl acetate (3m).** Eluent:  $V_{\text{DCM}}/V_{\text{MeOH}} = 40:1$ ; Yellow liquid (53.7 mg, 35% yield);  $^1\text{H}$  NMR (400 MHz,  $\text{CDCl}_3$ )  $\delta$  7.87-7.79 (m, 4H), 7.77-7.69 (m, 4H), 7.39-7.28 (m, 8H), 7.27 (s, 4H), 6.30 (s, 1H), 5.34 (d,  $J = 4.5$  Hz, 1H), 4.67-4.54 (m, 2H), 3.35-3.08 (m, 2H), 2.57 (s, 1H), 2.35-2.27 (m, 2H), 2.17-2.09 (m, 2H), 2.03 (s, 3H), 1.87-1.81 (m, 2H), 1.76 (d,  $J = 16.8$  Hz, 1H), 1.55 (s, 2H), 1.53 (s, 2H), 1.38-1.23 (m, 2H), 1.13 (d,  $J = 10.5$  Hz, 2H), 1.02 (s, 3H), 0.96-0.92 (m, 1H), 0.62 (s, 3H);  $^{13}\text{C}$  NMR (100 MHz,  $\text{CDCl}_3$ )  $\delta$  193.4, 170.5, 144.9, 140.1, 131.61, 131.60, 131.54, 131.49, 128.3, 128.23, 128.20, 128.17, 128.1, 121.9, 73.7, 55.8, 50.2, 46.1, 38.1, 38.0, 36.7, 34.5, 34.3, 32.1, 31.3, 29.9, 27.6, 21.4, 21.3, 20.4, 19.1, 15.7;  $^{31}\text{P}$  NMR (162 MHz,  $\text{CDCl}_3$ )  $\delta$  31.7

(d,  $J = 85.5$  Hz); HRMS (ESI-TOF)  $m/z$ :  $[M + H]^+$  Calcd for  $C_{48}H_{53}O_5P_2$  771.3363; Found 771.3363.

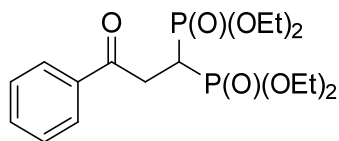

**Tetraethyl (3-oxo-3-phenylpropane-1,1-diyl)bis(phosphonate) (3n).** Eluent:  $V_{EA}/V_{PE} = 1:1$ ; Yellow liquid (32.8 mg, 40% yield);  $^1H$  NMR (400 MHz,  $CDCl_3$ )  $\delta$  7.53 (d,  $J = 7.7$  Hz, 2H), 7.34 (d,  $J = 7.4$  Hz, 3H), 5.66 (d,  $J = 8.0$  Hz, 1H), 4.29-4.01 (m, 8H), 3.11-2.88 (m, 2H), 1.33 (t,  $J = 7.0$  Hz, 6H), 1.24 (t,  $J = 7.1$  Hz, 6H);  $^{13}C$  NMR (100 MHz,  $CDCl_3$ )  $\delta$  201.8, 128.8, 128.4, 128.3, 125.7, 64.6 (d,  $J = 6.0$  Hz), 62.1 (d,  $J = 6.5$  Hz), 16.4 (d,  $J = 6.0$  Hz), 16.0 (d,  $J = 7.1$  Hz);  $^{31}P$  NMR (162 MHz,  $CDCl_3$ )  $\delta$  27.0; HRMS (ESI-TOF)  $m/z$ :  $[M + H]^+$  Calcd for  $C_{17}H_{29}O_7P_2$  407.1383; Found 407.1385.

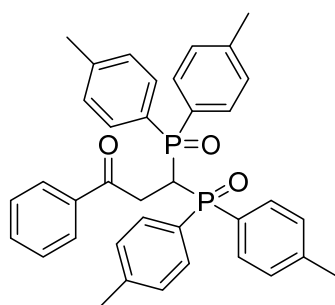

**3,3-Bis(di-*p*-tolylphosphoryl)-1-phenylpropan-1-one (3o).** Eluent:  $V_{EA}/V_{MeOH} = 10:1$ ; Yellow liquid (97.6 mg, 83% yield);  $^1H$  NMR (400 MHz,  $CDCl_3$ )  $\delta$  7.65-7.59 (m, 8H), 7.52 (d,  $J = 7.7$  Hz, 2H), 7.39 (d,  $J = 7.4$  Hz, 1H), 7.18 (t,  $J = 7.6$  Hz, 2H), 6.96 (s, 8H), 4.64-4.58 (m, 1H), 3.73-3.58 (m, 2H), 2.27 (s, 6H), 2.10 (s, 6H);  $^{13}C$  NMR (100 MHz,  $CDCl_3$ )  $\delta$  196.2 (t,  $J = 5.0$  Hz), 142.4, 142.0, 135.1, 133.2, 131.5, 131.4, 129.2, 129.1, 128.8, 128.7, 128.0, 127.1, 36.1 (t,  $J = 60.2$  Hz), 33.8, 21.5, 21.3;  $^{31}P$  NMR (162 MHz,  $CDCl_3$ )  $\delta$  33.2; HRMS (ESI-TOF)  $m/z$ :  $[M + H]^+$  Calcd for  $C_{37}H_{37}O_3P_2$  591.2212; Found 591.2211.

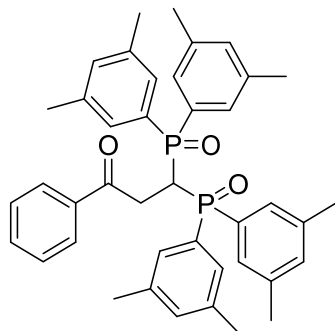

**3,3-Bis(bis(3,5-dimethylphenyl)phosphoryl)-1-phenylpropan-1-one (3p).** Eluent:  $V_{EA}/V_{MeOH} = 10:1$ ; White solid (68.9 mg, 53% yield); mp 130-132 °C;  $^1H$  NMR (400 MHz,  $CDCl_3$ )  $\delta$  7.66 (d,  $J = 7.6$  Hz, 2H), 7.42 (t,  $J = 7.3$  Hz, 1H), 7.38-7.25 (m, 10H), 6.82 (d,  $J = 23.8$  Hz, 4H), 4.57-4.50 (m, 1H), 3.74-3.65 (m, 2H), 2.16 (s, 12H), 2.09 (s, 12H);  $^{13}C$  NMR (100 MHz,  $CDCl_3$ )  $\delta$  196.3, 138.4, 138.2, 137.8, 137.7, 135.1, 133.7, 133.5, 133.4, 130.0, 128.7, 128.1, 128.0, 35.6, 33.6, 21.2, 21.0;  $^{31}P$  NMR (162 MHz,  $CDCl_3$ )  $\delta$  34.1; HRMS (ESI-TOF)  $m/z$ :  $[M + H]^+$  Calcd for  $C_{41}H_{45}O_3P_2$  647.2838; Found 647.2846.

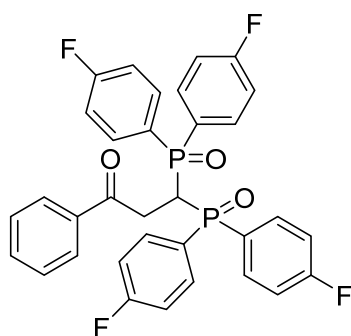

**3,3-Bis(bis(4-fluorophenyl)phosphoryl)-1-phenylpropan-1-one (3q).** Eluent:  $V_{EA}/V_{MeOH} = 10:1$ ; Yellow liquid (70.7 mg, 58% yield);  $^1H$  NMR (400 MHz,  $CDCl_3$ )  $\delta$  7.91-7.72 (m, 8H), 7.62 (d,  $J = 7.1$  Hz, 2H), 7.48 (t,  $J = 6.9$  Hz, 1H), 7.35-7.25 (m, 2H), 7.19-7.13 (m, 1H), 7.01-6.87 (m, 7H), 4.69-4.62 (m, 1H), 3.70-3.63 (m, 2H);  $^{13}C$  NMR (100 MHz,  $CDCl_3$ )  $\delta$  196.2, 166.4 (d,  $J = 4.7$  Hz), 163.9 (d,  $J = 6.0$  Hz), 134.7, 134.2, 134.1, 134.0, 128.4, 128.0, 116.3, 116.1, 116.0, 115.8, 36.4, 33.9;  $^{31}P$  NMR (162 MHz,  $CDCl_3$ )  $\delta$  32.4;  $^{19}F$  NMR (376 MHz,  $CDCl_3$ ):  $\delta$  -105.56; HRMS (ESI-TOF)  $m/z$ :  $[M + H]^+$  Calcd for  $C_{33}H_{25}F_4O_3P_2$  607.1210; Found 607.1210.

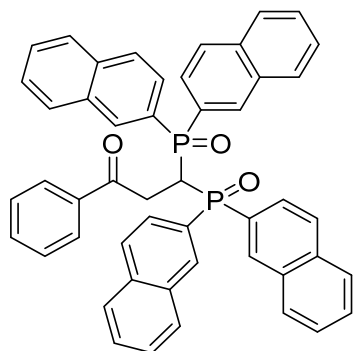

**3,3-Bis(di(naphthalen-2-yl)phosphoryl)-1-phenylpropan-1-one (3r).** Eluent:  $V_{EA}/V_{MeOH} = 10:1$ ; White solid (95.9 mg, 65% yield); mp 86-88 °C;  $^1H$  NMR (400 MHz,  $CDCl_3$ )  $\delta$  8.50 (d,  $J = 13.2$  Hz, 2H), 8.34 (d,  $J = 13.6$  Hz, 2H), 7.87 (s, 4H), 7.66 (d,  $J = 7.8$  Hz, 2H), 7.58 (d,  $J = 7.2$  Hz, 2H), 7.50-7.44 (m, 4H), 7.38-7.25 (m, 12H), 7.18 (t,  $J = 7.1$  Hz, 2H), 7.01 (t,  $J = 7.0$  Hz, 1H), 6.80 (t,  $J = 7.4$  Hz, 2H), 5.14-5.09 (m, 1H), 3.96-3.87 (m, 2H);  $^{13}C$  NMR (100 MHz,  $CDCl_3$ )  $\delta$  196.3 (t,  $J = 4.6$  Hz), 134.7, 134.4, 134.2, 134.0, 133.9, 133.1, 132.3, 132.1, 132.0, 131.9, 128.8, 128.6, 128.3, 128.1, 127.8, 127.52, 127.47, 127.3, 126.8, 126.6, 125.9, 125.8, 125.6, 125.5, 36.3 (t,  $J = 59.7$  Hz), 33.9;  $^{31}P$  NMR (162 MHz,  $CDCl_3$ )  $\delta$  32.8; HRMS (ESI-TOF)  $m/z$ :  $[M + H]^+$  Calcd for  $C_{49}H_{37}O_3P_2$  735.2212; Found 735.2217.

### General procedure for the synthesis of 4

In a 25 mL sealed tube were added enaminone **1** (0.2 mmol, 1 equiv), phosphine oxide **2** (0.8 mmol, 4 equiv),  $tBuOK$  (0.8 mmol, 4 equiv) and DMF/THF (1 mL/3 mL). After sealing the tube with Teflon cap, the mixture was stirred at 50 °C with oil bath heating for 12 h. After being cooled down to room temperature, 5 mL of water was added, and the resulting mixture was extracted with ethyl acetate ( $3 \times 10$  mL). The organic phases were collected and washed with a small amount of water for three times. After being dried with anhydrous  $Na_2SO_4$ , the solid was removed by filtration. The solvent in the resulting solution was removed at reduced pressure. The residue obtained therein was subjected to flash silica gel column chromatography to provide pure products with the elution of mixed ethyl acetate and methanol or dichloromethane and methanol ( $v/v = 10:1 \sim 200:3$ ).

### Procedure for the 1 mmol scale reaction for the synthesis of 4a

In a 50 mL sealed tube were added enaminone **1a** (1.0 mmol, 1 equiv), phosphine oxide **2a** (4.0 mmol, 4 equiv), *t*BuOK (4.0 mmol, 4 equiv) and DMF/THF (2 mL/6 mL). After sealing the tube with Teflon cap, the mixture was stirred at 50 °C with oil bath heating for 12 h. After being cooled down to room temperature, 20 mL of water was added, and the resulting mixture was extracted with ethyl acetate (3 × 40 mL). The combined organic phases were concentrated at reduced pressure. Mixed methanol (2 mL) and water (80 mL) was then added dropwise into the residue at stirring. The precipitates formed thereby were collected by filtration. The solid was washed subsequently with water and petroleum ether, dried at vacuum to give pure product **4a** (470.1 mg, 88% yield).

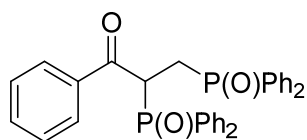

**2,3-Bis(diphenylphosphoryl)-1-phenylpropan-1-one (4a).**<sup>2</sup> Eluent:  $V_{EA}/V_{MeOH} = 10:1$ ; White solid (95.9 mg, 90% yield); mp 201-203 °C; <sup>1</sup>H NMR (400 MHz, CDCl<sub>3</sub>) δ 7.87-7.79 (m, 2H), 7.69-7.55 (m, 7H), 7.50-7.43 (m, 9H), 7.25-7.15 (m, 5H), 7.10 (t,  $J = 7.3$  Hz, 2H), 5.27-5.19 (m, 1H), 3.59-3.51 (m, 1H), 2.84-2.74 (m, 1H); <sup>13</sup>C NMR (100 MHz, CDCl<sub>3</sub>) δ 195.1 (d,  $J = 2.3$  Hz), 137.5, 132.6, 132.4, 132.1 (d,  $J = 3.9$  Hz), 131.9, 131.7, 131.6 (d,  $J = 2.6$  Hz), 131.5, 131.3, 131.2, 130.6, 130.5, 128.9, 128.85, 128.77, 128.7, 128.4, 128.3, 128.2, 127.8, 42.9 (d,  $J = 49.2$  Hz), 28.0 (d,  $J = 63.9$  Hz); <sup>31</sup>P NMR (162 MHz, CDCl<sub>3</sub>) δ 30.9 (d,  $J = 42.0$  Hz), 30.4 (d,  $J = 41.8$  Hz).

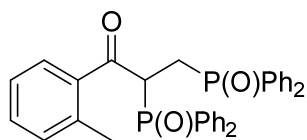

**2,3-Bis(diphenylphosphoryl)-1-(o-tolyl)propan-1-one (4b).** Eluent:  $V_{EA}/V_{MeOH} = 10:1$ ; Yellow solid (85.9 mg, 78% yield); mp 168-170 °C; <sup>1</sup>H NMR (400 MHz, CDCl<sub>3</sub>) δ 7.82 (t,  $J = 8.4$  Hz, 2H), 7.72-7.65 (m, 2H), 7.64-7.54 (m, 5H), 7.51-7.45 (m, 2H), 7.41 (d,  $J = 6.6$  Hz, 4H), 7.37-7.28 (m, 3H), 7.25 (d,  $J = 7.4$  Hz, 1H), 7.16-7.07 (m, 3H), 7.03 (t,  $J = 7.2$  Hz, 1H), 6.80 (d,  $J = 7.2$  Hz, 1H), 5.31-5.07 (m, 1H), 3.67 (s, 1H), 2.66



(d,  $J = 13.7$  Hz, 1H), 2.01 (s, 3H);  $^{13}\text{C}$  NMR (100 MHz,  $\text{CDCl}_3$ )  $\delta$  196.7 (d,  $J = 3.4$  Hz), 138.6, 138.1, 132.2, 132.0, 131.8, 131.32, 131.28, 131.2, 131.1, 130.6, 130.5, 129.3, 128.9, 128.8, 128.7, 128.5, 128.4, 128.2, 128.1, 125.1, 45.8 (d,  $J = 50.5$  Hz), 26.7 (d,  $J = 63.3$  Hz), 20.7;  $^{31}\text{P}$  NMR (162 MHz,  $\text{CDCl}_3$ )  $\delta$  31.0 (d,  $J = 41.3$  Hz), 30.5 (d,  $J = 40.5$  Hz); HRMS (ESI-TOF)  $m/z$ :  $[\text{M} + \text{H}]^+$  Calcd for  $\text{C}_{34}\text{H}_{31}\text{O}_3\text{P}_2$  549.1743; Found 549.1753.

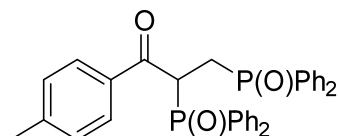

**2,3-Bis(diphenylphosphoryl)-1-(p-tolyl)propan-1-one (4c).** Eluent:  $V_{\text{EA}}/V_{\text{MeOH}} = 10:1$ ; White solid (93.5 mg, 85% yield); mp 220-222 °C;  $^1\text{H}$  NMR (400 MHz,  $\text{CDCl}_3$ )  $\delta$  7.82 (t,  $J = 9.3$  Hz, 2H), 7.67-7.48 (m, 8H), 7.46-7.28 (m, 8H), 7.23-7.17 (m, 4H), 6.90 (d,  $J = 7.7$  Hz, 2H), 5.24-5.15 (m, 1H), 3.57-3.49 (m, 1H), 2.78 (d,  $J = 14.0$  Hz, 1H), 2.26 (s, 3H);  $^{13}\text{C}$  NMR (100 MHz,  $\text{CDCl}_3$ )  $\delta$  194.6 (d,  $J = 3.2$  Hz), 143.5 (d,  $J = 3.0$  Hz), 135.0 (d,  $J = 3.3$  Hz), 132.3, 132.0, 131.9, 131.8, 131.7, 131.6, 131.4, 131.3, 130.7, 130.62 (d,  $J = 2.9$  Hz), 130.56, 128.8, 128.7, 128.6 (d,  $J = 2.8$  Hz), 128.5, 128.4, 128.3, 128.1, 42.7 (d,  $J = 50.7$  Hz), 27.9 (d,  $J = 63.9$  Hz), 21.5;  $^{31}\text{P}$  NMR (162 MHz,  $\text{CDCl}_3$ )  $\delta$  31.4 (d,  $J = 42.3$  Hz), 30.6 (d,  $J = 42.3$  Hz); HRMS (ESI-TOF)  $m/z$ :  $[\text{M} + \text{H}]^+$  Calcd for  $\text{C}_{34}\text{H}_{31}\text{O}_3\text{P}_2$  549.1743; Found 549.1750. .

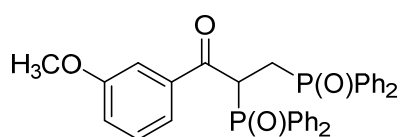

**2,3-Bis(diphenylphosphoryl)-1-(3-methoxyphenyl)propan-1-one (4d).** Eluent:  $V_{\text{EA}}/V_{\text{MeOH}} = 10:1$ ; White solid (89.5 mg, 79% yield); mp 200-202 °C;  $^1\text{H}$  NMR (400 MHz,  $\text{DMSO}-d_6$ )  $\delta$  7.81 (t,  $J = 9.1$  Hz, 2H), 7.69-7.58 (m, 6H), 7.57-7.48 (m, 6H), 7.42 (d,  $J = 7.2$  Hz, 1H), 7.36 (d,  $J = 7.4$  Hz, 3H), 7.27-7.15 (m, 4H), 7.03-6.90 (m, 2H), 5.23-4.93 (m, 1H), 3.69 (s, 3H), 3.36 (d,  $J = 11.0$  Hz, 1H), 2.69-2.57 (m, 1H);  $^{13}\text{C}$  NMR (100 MHz,  $\text{DMSO}-d_6$ )  $\delta$  195.1 (d,  $J = 3.1$  Hz), 159.1, 139.5, 132.8, 132.5, 132.3, 131.9, 131.8, 131.6, 131.5, 131.04, 130.95, 130.86, 129.5, 129.4, 129.3 (d,  $J = 2.9$  Hz), 129.0, 128.9, 128.8, 128.7, 121.5, 119.3, 113.1, 55.6, 43.7 (d,  $J = 51.7$  Hz), 28.2 (d,  $J = 65.3$

Hz);  $^{31}\text{P}$  NMR (162 MHz, DMSO-*d*<sub>6</sub>)  $\delta$  29.3 (d,  $J$  = 44.3 Hz), 28.4 (d,  $J$  = 44.4 Hz); HRMS (ESI-TOF)  $m/z$ :  $[\text{M} + \text{H}]^+$  Calcd for C<sub>34</sub>H<sub>31</sub>O<sub>4</sub>P<sub>2</sub> 565.1692; Found 565.1690.

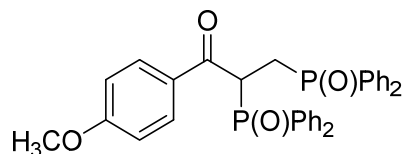

**2,3-Bis(diphenylphosphoryl)-1-(4-methoxyphenyl)propan-1-one (4e).** Eluent:  $V_{\text{EA}}/V_{\text{MeOH}} = 10:1$ ; White solid (90.6 mg, 80% yield); mp 198-200 °C;  $^1\text{H}$  NMR (400 MHz, CDCl<sub>3</sub>)  $\delta$  7.83 (t,  $J$  = 9.3 Hz, 2H), 7.66 (s, 4H), 7.58-7.49 (m, 6H), 7.46-7.39 (m, 5H), 7.37-7.27 (m, 2H), 7.24-7.13 (m, 3H), 6.59 (d,  $J$  = 8.4 Hz, 2H), 5.22-5.13 (m, 1H), 3.76 (s, 3H), 3.56-3.47 (m, 1H), 2.83-2.76 (m, 1H);  $^{13}\text{C}$  NMR (100 MHz, CDCl<sub>3</sub>)  $\delta$  193.2 (d,  $J$  = 2.9 Hz), 163.2, 132.4, 132.1, 131.9, 131.8, 131.69, 131.67, 131.6, 131.4, 131.3, 130.9, 130.6, 130.5, 128.8, 128.7, 128.4, 128.3, 128.2, 128.1, 113.0, 55.4, 42.4 (d,  $J$  = 53.0 Hz), 28.0 (d,  $J$  = 65.9 Hz);  $^{31}\text{P}$  NMR (162 MHz, CDCl<sub>3</sub>)  $\delta$  31.7 (d,  $J$  = 42.6 Hz), 30.8 (d,  $J$  = 42.6 Hz); HRMS (ESI-TOF)  $m/z$ :  $[\text{M} + \text{H}]^+$  Calcd for C<sub>34</sub>H<sub>31</sub>O<sub>4</sub>P<sub>2</sub> 565.1692; Found 565.1699.

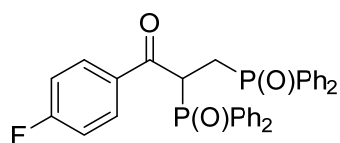

**2,3-Bis(diphenylphosphoryl)-1-(4-fluorophenyl)propan-1-one (4f).** Eluent:  $V_{\text{EA}}/V_{\text{MeOH}} = 10:1$ ; White solid (66.5 mg, 60% yield); mp 223-225 °C;  $^1\text{H}$  NMR (400 MHz, CDCl<sub>3</sub>)  $\delta$  7.85-7.78 (m, 2H), 7.69-7.55 (m, 6H), 7.53-7.50 (m, 4H), 7.47-7.40 (m, 5H), 7.34 (t,  $J$  = 8.0 Hz, 1H), 7.27-7.24 (m, 2H), 7.22-7.15 (m, 2H), 6.79 (t,  $J$  = 8.6 Hz, 2H), 5.21-5.12 (m, 1H), 3.62-3.38 (m, 1H), 2.81-2.71 (m, 1H);  $^{13}\text{C}$  NMR (100 MHz, CDCl<sub>3</sub>)  $\delta$  193.6 (d,  $J$  = 3.2 Hz), 132.5 (d,  $J$  = 2.0 Hz), 132.2 (d,  $J$  = 2.3 Hz), 132.1 (d,  $J$  = 2.1 Hz), 132.0 (d,  $J$  = 2.1 Hz), 131.8, 131.7, 131.6, 131.5, 131.3 (d,  $J$  = 9.2 Hz), 131.1 (d,  $J$  = 9.4 Hz), 130.6, 130.5, 128.9 (d,  $J$  = 3.1 Hz), 128.8 (d,  $J$  = 2.9 Hz), 128.5, 128.4, 128.3, 128.2, 115.0 (d,  $J$  = 21.4 Hz), 114.9 (d,  $J$  = 21.9 Hz), 43.1 (d,  $J$  = 49.4 Hz), 28.1 (d,  $J$  = 60.7 Hz);  $^{31}\text{P}$  NMR (162 MHz, CDCl<sub>3</sub>)  $\delta$  31.1 (d,  $J$  = 41.8 Hz), 30.5 (d,  $J$  = 41.8 Hz);  $^{19}\text{F}$  NMR (376 MHz, CDCl<sub>3</sub>)  $\delta$  -105.39; HRMS (ESI-TOF)  $m/z$ :  $[\text{M} + \text{H}]^+$  Calcd for C<sub>33</sub>H<sub>28</sub>FO<sub>3</sub>P<sub>2</sub> 553.1492; Found 553.1491.

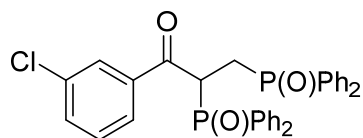

**1-(3-Chlorophenyl)-2,3-bis(diphenylphosphoryl)propan-1-one (4g).** Eluent:  $V_{EA}/V_{MeOH} = 10:1$ ; White solid (85.5 mg, 75% yield); mp 210-212 °C;  $^1H$  NMR (400 MHz,  $CDCl_3$ )  $\delta$  7.82 (t,  $J = 9.0$  Hz, 2H), 7.69-7.60 (m, 4H), 7.60-7.50 (m, 4H), 7.45 (t,  $J = 6.6$  Hz, 5H), 7.36-7.30 (m, 2H), 7.27 (s, 1H), 7.26-7.18 (m, 5H), 7.07 (t,  $J = 8.1$  Hz, 1H), 5.11 (d,  $J = 10.8$  Hz, 1H), 3.55-3.48 (m, 1H), 2.77 (d,  $J = 15.2$  Hz, 1H);  $^{13}C$  NMR (100 MHz,  $CDCl_3$ )  $\delta$  194.2 (d,  $J = 2.5$  Hz), 139.1, 134.1, 132.6, 132.4, 132.3, 132.2, 132.0, 131.7 (d,  $J = 1.9$  Hz), 131.6 (d,  $J = 1.9$  Hz), 131.55 (d,  $J = 1.9$  Hz), 131.48 (d,  $J = 2.1$  Hz), 131.4 (d,  $J = 2.2$  Hz), 131.3 (d,  $J = 2.2$  Hz), 130.7 (d,  $J = 2.2$  Hz), 130.6 (d,  $J = 2.3$  Hz), 129.1, 129.0-128.8 (m), 128.5 (d,  $J = 2.8$  Hz), 128.4-128.4 (m), 128.3 (d,  $J = 2.8$  Hz), 128.2, 126.5, 43.6 (d,  $J = 50.5$  Hz), 28.1 (d,  $J = 65.3$  Hz);  $^{31}P$  NMR (162 MHz,  $CDCl_3$ )  $\delta$  30.7 (d,  $J = 41.2$  Hz), 30.4 (d,  $J = 41.3$  Hz); HRMS (ESI-TOF)  $m/z$ :  $[M + H]^+$  Calcd for  $C_{33}H_{28}ClO_3P_2$  569.1197; Found 569.1199.

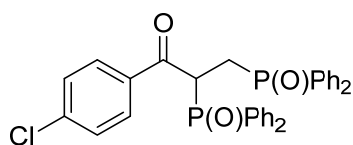

**1-(4-Chlorophenyl)-2,3-bis(diphenylphosphoryl)propan-1-one (4h).** Eluent:  $V_{EA}/V_{MeOH} = 10:1$ ; White solid (77.6 mg, 68% yield); mp 222-224 °C;  $^1H$  NMR (400 MHz,  $CDCl_3$ )  $\delta$  7.81 (t,  $J = 9.2$  Hz, 2H), 7.68-7.50 (m, 8H), 7.43 (t,  $J = 8.0$  Hz, 6H), 7.35 (t,  $J = 7.4$  Hz, 1H), 7.29-7.18 (m, 5H), 7.09 (d,  $J = 8.2$  Hz, 2H), 5.19-5.11 (m, 1H), 3.62-3.43 (m, 1H), 2.81-2.71 (m, 1H);  $^{13}C$  NMR (100 MHz,  $CDCl_3$ )  $\delta$  194.1 (d,  $J = 3.0$  Hz), 139.1, 135.9, 132.5, 132.3 (d,  $J = 2.7$  Hz), 132.1 (d,  $J = 14.9$  Hz), 131.8, 131.7, 131.6, 131.5, 131.3 (d,  $J = 9.1$  Hz), 130.6, 130.5, 129.8, 128.9 (d,  $J = 4.5$  Hz), 128.8 (d,  $J = 4.4$  Hz), 128.6, 128.44, 128.36, 128.2, 128.1, 43.2 (d,  $J = 49.6$  Hz), 28.1 (d,  $J = 64.2$  Hz);  $^{31}P$  NMR (162 MHz,  $CDCl_3$ )  $\delta$  31.0 (d,  $J = 41.8$  Hz), 30.5 (d,  $J = 41.8$  Hz); HRMS (ESI-TOF)  $m/z$ :  $[M + H]^+$  Calcd for  $C_{33}H_{28}ClO_3P_2$  569.1197; Found 569.1192.

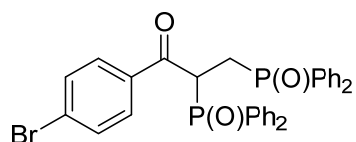

**1-(4-Bromophenyl)-2,3-bis(diphenylphosphoryl)propan-1-one (4i).** Eluent:  $V_{\text{DCM}}/V_{\text{MeOH}} = 200:3$ ; Yellow liquid (48.8 mg, 40% yield);  $^1\text{H NMR}$  (400 MHz,  $\text{CDCl}_3$ )  $\delta$  7.83 (s, 3H), 7.71-7.49 (m, 10H), 7.48-7.41 (m, 4H), 7.38-7.28 (m, 5H), 7.25 (s, 2H), 5.27-5.04 (m, 1H), 2.83-2.72 (m, 1H), 2.47-2.33 (m, 1H);  $^{13}\text{C NMR}$  (100 MHz,  $\text{CDCl}_3$ )  $\delta$  194.3 (d,  $J = 3.0$  Hz), 136.3, 132.5, 132.3 (d,  $J = 2.1$  Hz), 132.1, 132.0 (d,  $J = 2.3$  Hz), 131.7, 131.6 (d,  $J = 6.8$  Hz), 131.5, 131.4, 131.3, 131.1, 130.6 (d,  $J = 8.8$  Hz), 129.9, 128.9 (d,  $J = 4.9$  Hz), 128.8 (d,  $J = 5.0$  Hz), 128.6, 128.5, 128.4, 128.3, 127.9, 43.3 (d,  $J = 44.0$  Hz), 29.5 (d,  $J = 37.5$  Hz);  $^{31}\text{P NMR}$  (162 MHz,  $\text{CDCl}_3$ )  $\delta$  31.0 (d,  $J = 41.8$  Hz), 30.5 (d,  $J = 42.0$  Hz); HRMS (ESI-TOF)  $m/z$ :  $[\text{M} + \text{H}]^+$  Calcd for  $\text{C}_{33}\text{H}_{28}\text{BrO}_3\text{P}_2$  613.0692; Found 613.0698.

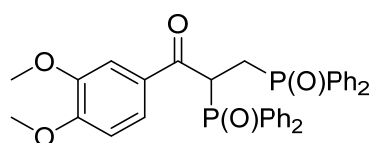

**1-(3,4-Dimethoxyphenyl)-2,3-bis(diphenylphosphoryl)propan-1-one (4j).** Eluent:  $V_{\text{EA}}/V_{\text{MeOH}} = 10:1$ ; White solid (94.8 mg, 80% yield); mp 215-217 °C;  $^1\text{H NMR}$  (400 MHz,  $\text{CDCl}_3$ )  $\delta$  7.87-7.79 (m, 2H), 7.71-7.63 (m, 4H), 7.60-7.53 (m, 2H), 7.52-7.47 (m, 2H), 7.42 (d,  $J = 6.7$  Hz, 4H), 7.35 (t,  $J = 7.3$  Hz, 1H), 7.30 (s, 2H), 7.25 (d,  $J = 4.4$  Hz, 2H), 7.19 (t,  $J = 6.6$  Hz, 2H), 6.92 (d,  $J = 1.9$  Hz, 1H), 6.59 (d,  $J = 8.4$  Hz, 1H), 5.31-5.05 (m, 1H), 3.80 (d,  $J = 39.8$  Hz, 6H), 3.55-3.44 (m, 1H), 2.79 (d,  $J = 14.4$  Hz, 1H);  $^{13}\text{C NMR}$  (100 MHz,  $\text{CDCl}_3$ )  $\delta$  193.4 (d,  $J = 3.5$  Hz), 153.0, 148.2, 132.3, 132.1, 131.8, 131.70, 131.67, 131.6, 131.3 (d,  $J = 9.4$  Hz), 130.8, 130.6, 130.5, 128.8, 128.7, 128.4, 128.3, 128.2, 128.1, 123.7, 110.4, 109.4, 55.9, 55.7, 42.7 (d,  $J = 52.9$  Hz), 28.0 (d,  $J = 66.5$  Hz);  $^{31}\text{P NMR}$  (162 MHz,  $\text{CDCl}_3$ )  $\delta$  31.4 (d,  $J = 42.6$  Hz), 30.6 (d,  $J = 42.6$  Hz); HRMS (ESI-TOF)  $m/z$ :  $[\text{M} + \text{H}]^+$  Calcd for  $\text{C}_{35}\text{H}_{33}\text{O}_5\text{P}_2$  595.1798; Found 595.1800.

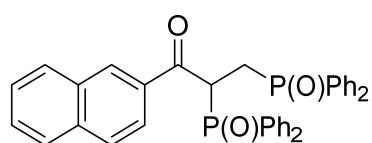

**2,3-Bis(diphenylphosphoryl)-1-(naphthalen-2-yl)propan-1-one (4k).** Eluent:  $V_{EA}/V_{MeOH} = 10:1$ ; White solid (95.5 mg, 82% yield); mp 196-198 °C;  $^1H$  NMR (400 MHz,  $CDCl_3$ )  $\delta$  7.96 (s, 1H), 7.88 (t,  $J = 9.1$  Hz, 2H), 7.78-7.64 (m, 6H), 7.62-7.54 (m, 3H), 7.53-7.41 (m, 10H), 7.11 (d,  $J = 20.3$  Hz, 5H), 5.46-5.30 (m, 1H), 3.69-3.50 (m, 1H), 2.86 (d,  $J = 14.0$  Hz, 1H);  $^{13}C$  NMR (100 MHz,  $CDCl_3$ )  $\delta$  195.0 (d,  $J = 2.9$  Hz), 135.1, 134.8, 132.5, 132.1, 131.9, 131.81, 131.77, 131.7, 131.6, 131.5, 131.4, 131.3, 130.7, 130.6, 130.5, 129.7, 128.9 (d,  $J = 2.7$  Hz), 128.8 (d,  $J = 2.8$  Hz), 128.44, 128.40, 128.3, 128.2, 127.7, 127.4, 126.4, 123.9, 43.2 (d,  $J = 50.3$  Hz), 28.0 (d,  $J = 64.1$  Hz);  $^{31}P$  NMR (162 MHz,  $CDCl_3$ )  $\delta$  31.6 (d,  $J = 42.0$  Hz), 31.0 (d,  $J = 42.0$  Hz); HRMS (ESI-TOF)  $m/z$ :  $[M + H]^+$  Calcd for  $C_{37}H_{31}O_3P_2$  585.1743; Found 585.1749.

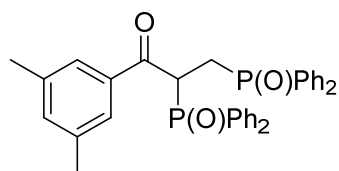

**1-(3,5-Dimethylphenyl)-2,3-bis(diphenylphosphoryl)propan-1-one (4l).** Eluent:  $V_{EA}/V_{MeOH} = 10:1$ ; White solid (87.5 mg, 78% yield); mp 144-146 °C;  $^1H$  NMR (400 MHz,  $CDCl_3$ )  $\delta$  7.84 (t,  $J = 9.1$  Hz, 2H), 7.71-7.56 (m, 6H), 7.53-7.41 (m, 7H), 7.34-7.27 (m, 2H), 7.21 (d,  $J = 8.7$  Hz, 3H), 6.91 (d,  $J = 14.4$  Hz, 3H), 5.30-5.04 (m, 1H), 3.65-3.36 (m, 1H), 2.81 (t,  $J = 13.5$  Hz, 1H), 2.13 (s, 6H);  $^{13}C$  NMR (100 MHz,  $CDCl_3$ )  $\delta$  195.5 (d,  $J = 2.8$  Hz), 137.6, 137.2, 134.3, 132.4, 132.1, 131.79, 131.75, 131.7, 131.6, 131.4, 131.3, 130.7, 130.6, 128.8, 128.7, 128.6, 128.3 (d,  $J = 2.0$  Hz), 128.2, 126.1, 123.6, 43.4 (d,  $J = 49.7$  Hz), 27.8 (d,  $J = 65.2$  Hz), 21.0;  $^{31}P$  NMR (162 MHz,  $CDCl_3$ )  $\delta$  31.5 (d,  $J = 42.1$  Hz), 31.0 (d,  $J = 42.0$  Hz); HRMS (ESI-TOF)  $m/z$ :  $[M + H]^+$  Calcd for  $C_{35}H_{33}O_3P_2$  563.1899; Found 563.1912.

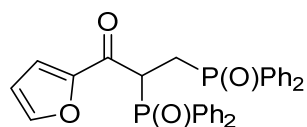

**2,3-Bis(diphenylphosphoryl)-1-(furan-2-yl)propan-1-one (4m).** Eluent:  $V_{EA}/V_{MeOH} = 10:1$ ; White solid (81.5 mg, 78% yield); mp 233-235 °C;  $^1H$  NMR (400 MHz,  $CDCl_3$ )  $\delta$  7.86 (t,  $J = 9.2$  Hz, 2H), 7.73-7.63 (m, 4H), 7.58 (t,  $J = 9.5$  Hz, 2H), 7.52 (d,  $J = 6.6$

Hz, 2H), 7.44 (d,  $J = 9.5$  Hz, 4H), 7.36-7.19 (m, 7H), 6.73 (d,  $J = 2.8$  Hz, 1H), 6.24-6.13 (m, 1H), 5.17-4.90 (m, 1H), 3.58-3.38 (m, 1H), 2.81-2.70 (m, 1H);  $^{13}\text{C}$  NMR (100 MHz,  $\text{CDCl}_3$ )  $\delta$  182.5 (d,  $J = 3.2$  Hz), 152.3, 146.2, 132.4, 132.1, 131.9, 131.7, 131.6, 131.5, 131.4, 131.3, 131.2, 130.8, 130.7, 128.9, 128.8, 128.7, 128.3, 128.2, 128.1, 117.7, 112.5, 43.0 (d,  $J = 49.8$  Hz), 27.1 (d,  $J = 63.7$  Hz);  $^{31}\text{P}$  NMR (162 MHz,  $\text{CDCl}_3$ )  $\delta$  31.3 (d,  $J = 41.7$  Hz), 30.7 (d,  $J = 41.7$  Hz); HRMS (ESI-TOF)  $m/z$ :  $[\text{M} + \text{H}]^+$  Calcd for  $\text{C}_{31}\text{H}_{27}\text{O}_4\text{P}_2$  525.1379; Found 525.1379.

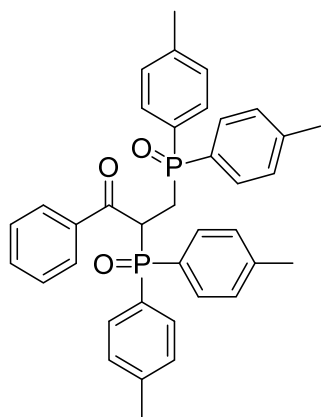

**2,3-Bis(di-p-tolylphosphoryl)-1-phenylpropan-1-one (4n).** Eluent:  $V_{\text{DCM}}/V_{\text{MeOH}} = 40:1$ ; White solid (101.3 mg, 86% yield); mp 210-212 °C;  $^1\text{H}$  NMR (400 MHz,  $\text{CDCl}_3$ )  $\delta$  7.72-7.65 (m, 2H), 7.57-7.48 (m, 4H), 7.47-7.38 (m, 4H), 7.31 (d,  $J = 6.1$  Hz, 1H), 7.21 (d,  $J = 7.1$  Hz, 4H), 7.10 (t,  $J = 7.8$  Hz, 2H), 7.05-6.98 (m, 2H), 6.93 (d,  $J = 8.0$  Hz, 2H), 5.26-5.04 (m, 1H), 3.45 (t,  $J = 16.3$  Hz, 1H), 2.81-2.68 (m, 1H), 2.35 (s, 6H), 2.18 (d,  $J = 30.3$  Hz, 6H);  $^{13}\text{C}$  NMR (100 MHz,  $\text{CDCl}_3$ )  $\delta$  195.5 (d,  $J = 3.3$  Hz), 142.8 (d,  $J = 2.4$  Hz), 142.5 (d,  $J = 2.6$  Hz), 142.4, 142.2 (d,  $J = 2.5$  Hz), 137.6, 132.2, 131.8, 131.70, 131.66, 131.6, 131.4, 131.3, 130.7, 130.6, 129.5 (d,  $J = 2.0$  Hz), 129.4 (d,  $J = 1.7$  Hz), 129.1, 129.0, 128.8, 128.5, 127.5, 43.3 (d,  $J = 52.0$  Hz), 28.4 (d,  $J = 66.0$  Hz), 21.5, 21.4, 21.3;  $^{31}\text{P}$  NMR (162 MHz,  $\text{CDCl}_3$ )  $\delta$  31.8 (d,  $J = 41.3$  Hz), 31.0 (d,  $J = 41.8$  Hz); HRMS (ESI-TOF)  $m/z$ :  $[\text{M} + \text{H}]^+$  Calcd for  $\text{C}_{37}\text{H}_{37}\text{O}_3\text{P}_2$  591.2212; Found 591.2221.

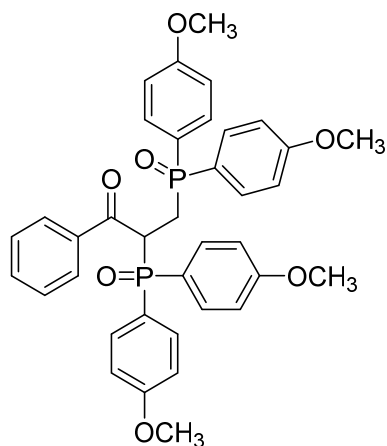

**2,3-Bis(bis(4-methoxyphenyl)phosphoryl)-1-phenylpropan-1-one (4o).** Eluent:  $V_{\text{DCM}}/V_{\text{MeOH}} = 40:1$ ; Yellow liquid (65.8 mg, 50% yield);  $^1\text{H NMR}$  (400 MHz,  $\text{CDCl}_3$ )  $\delta$  7.75-7.69 (m, 2H), 7.60-7.53 (m, 4H), 7.51-7.40 (m, 4H), 7.32 (d,  $J = 7.4$  Hz, 1H), 7.13 (t,  $J = 7.7$  Hz, 3H), 6.92 (d,  $J = 7.3$  Hz, 4H), 6.80-6.53 (m, 3H), 5.21-5.08 (m, 1H), 3.81 (d,  $J = 1.7$  Hz, 6H), 3.72 (s, 3H), 3.64 (s, 3H), 3.43-3.34 (m, 1H), 2.79-2.62 (m, 1H);  $^{13}\text{C NMR}$  (100 MHz,  $\text{CDCl}_3$ )  $\delta$  195.6 (d,  $J = 3.1$  Hz), 162.7 (d,  $J = 2.7$  Hz), 162.5 (t,  $J = 2.5$  Hz), 162.3 (d,  $J = 2.6$  Hz), 137.6, 133.7, 133.6, 133.5, 133.4, 133.2, 132.9, 132.8, 132.5, 132.43, 132.37, 128.5, 127.6, 114.3, 114.2, 114.0, 113.9, 113.8, 113.7, 55.3, 55.2, 55.1, 43.3 (d,  $J = 52.1$  Hz), 28.7 (d,  $J = 65.7$  Hz);  $^{31}\text{P NMR}$  (162 MHz,  $\text{CDCl}_3$ )  $\delta$  31.6 (d,  $J = 41.7$  Hz), 30.9 (d,  $J = 41.9$  Hz); HRMS (ESI-TOF)  $m/z$ :  $[\text{M} + \text{H}]^+$  Calcd for  $\text{C}_{37}\text{H}_{37}\text{O}_7\text{P}_2$  655.2009; Found 655.2022.

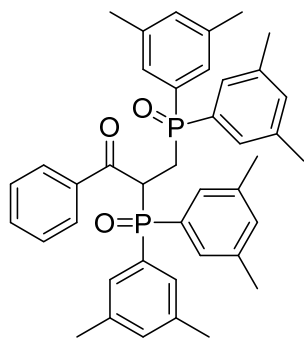

**2,3-Bis(bis(3,5-dimethylphenyl)phosphoryl)-1-phenylpropan-1-one (4p).** Eluent:  $V_{\text{DCM}}/V_{\text{MeOH}} = 40:1$ ; Yellow solid (107.7 mg, 83% yield); mp 202-204 °C;  $^1\text{H NMR}$  (400 MHz,  $\text{DMSO}-d_6$ )  $\delta$  7.61-7.51 (m, 2H), 7.48-7.37 (m, 3H), 7.28-7.08 (m, 10H), 6.94 (s, 1H), 6.84 (s, 1H), 5.10 (d,  $J = 10.0$  Hz, 1H), 3.35 (d,  $J = 11.8$  Hz, 1H), 2.59 (t,  $J = 12.9$  Hz, 1H), 2.25 (s, 12H), 2.07 (d,  $J = 31.3$  Hz, 12H);  $^{13}\text{C NMR}$  (100 MHz,  $\text{CDCl}_3$ )

$\delta$  195.0 (d,  $J = 3.3$  Hz), 138.6, 138.5, 138.4, 138.3, 138.0, 137.9, 137.84, 137.79, 137.6, 134.0, 133.6, 133.5 (d,  $J = 2.3$  Hz), 133.3 (d,  $J = 2.2$  Hz), 132.2, 129.2, 129.14, 129.07 (d,  $J = 3.5$  Hz), 129.0 (d,  $J = 3.3$  Hz), 128.2, 128.1, 128.0, 127.3, 42.5 (d,  $J = 49.8$  Hz), 27.9 (d,  $J = 64.1$  Hz), 21.3, 21.2, 21.0, 20.9 ;  $^{31}\text{P}$  NMR (162 MHz, DMSO- $d_6$ )  $\delta$  29.5 (d,  $J = 42.6$  Hz), 28.5 (d,  $J = 42.8$  Hz); HRMS (ESI-TOF)  $m/z$ :  $[\text{M} + \text{H}]^+$  Calcd for  $\text{C}_{41}\text{H}_{45}\text{O}_3\text{P}_2$  647.2838; Found 647.2847.

### General procedure for the synthesis of **5**

In a 25 mL sealed tube were added enaminone **1** (0.2 mmol, 1 equiv), dialkyl phosphonate/phosphine oxide **2** (0.3 mmol, 1.5 equiv),  $\text{CH}_3\text{COOH}$  (0.4 mmol, 2 equiv),  $\text{I}_2$  (20 mol%) and DMF (2 mL, 0.1 M). After sealing the tube with Teflon cap, the mixture was stirred at 50 °C with oil bath heating for 12 h. After being cooled down to room temperature, 5 mL of water was added, and the resulting mixture was extracted with ethyl acetate ( $3 \times 10$  mL). The organic phases were collected and washed with a small amount of water for three times. After being dried with anhydrous  $\text{Na}_2\text{SO}_4$ , the solid was removed by filtration. The solvent in the resulting solution was removed at reduced pressure. The residue obtained therein was subjected to flash silica gel column chromatography to provide pure products with the elution of mixed ethyl acetate and petroleum ether (v/v = 1:1~2:1).

### Procedure for the 1 mmol scale reaction for the synthesis of **5a**

In a 50 mL sealed tube were added enaminone **1a** (1 mmol, 1 equiv), diphenyl phosphine oxide **2a** (1.5 mmol, 1.5 equiv),  $\text{CH}_3\text{COOH}$  (2 mmol, 2 equiv),  $\text{I}_2$  (0.2 mmol, 20 mol%) and DMF (6 mL, 0.17 M). After sealing the tube with Teflon cap, the mixture was stirred at 50 °C with oil bath heating for 12 h. After being cooled down to room temperature, 20 mL of water was added, and the resulting mixture was extracted with ethyl acetate ( $3 \times 40$  mL). The organic phases were collected and washed with a small amount of water for three times. After being dried with anhydrous  $\text{Na}_2\text{SO}_4$ , the solid was removed by filtration. The solvent in the resulting solution was removed at reduced pressure. The residue obtained therein was subjected to flash silica gel column



chromatography to provide pure product **5a** (166.0 mg, 50% yield) with the elution of mixed ethyl acetate and petroleum ether (v/v = 1:2).

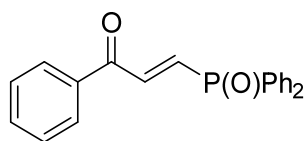

**(E)-3-(Diphenylphosphoryl)-1-phenylprop-2-en-1-one (5a)**. Eluent:  $V_{EA}/V_{PE} = 1:2$ ; White solid (36.8 mg, 55% yield); mp 108-110 °C;  $^1\text{H NMR}$  (400 MHz,  $\text{CDCl}_3$ )  $\delta$  8.13-8.01 (m, 3H), 7.79-7.70 (m, 4H), 7.69-7.62 (m, 1H), 7.62-7.55 (m, 3H), 7.50 (t,  $J = 7.4$  Hz, 6H);  $^{13}\text{C NMR}$  (100 MHz,  $\text{CDCl}_3$ )  $\delta$  188.1 (d,  $J = 16.5$  Hz), 139.3, 137.3, 136.4 (d,  $J = 6.2$  Hz), 133.9, 132.4, 131.3 (d,  $J = 9.9$  Hz), 129.0, 128.94, 128.89, 128.8;  $^{31}\text{P NMR}$  (162 MHz,  $\text{CDCl}_3$ )  $\delta$  22.6; HRMS (ESI-TOF)  $m/z$ :  $[\text{M} + \text{H}]^+$  Calcd for  $\text{C}_{21}\text{H}_{18}\text{O}_2\text{P}$  333.1039; Found 333.1043.

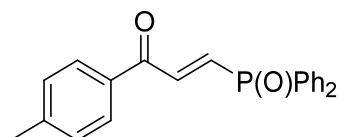

**(E)-3-(Diphenylphosphoryl)-1-(p-tolyl)prop-2-en-1-one (5b)**. Eluent:  $V_{EA}/V_{PE} = 1:2$ ; White solid (34.8 mg, 50% yield); mp 176-178 °C;  $^1\text{H NMR}$  (400 MHz,  $\text{CDCl}_3$ )  $\delta$  8.06 (t,  $J = 17.0$  Hz, 1H), 7.96 (d,  $J = 8.0$  Hz, 2H), 7.80-7.70 (m, 4H), 7.69-7.60 (m, 1H), 7.59-7.47 (m, 6H), 7.29 (d,  $J = 7.9$  Hz, 2H), 2.42 (s, 3H);  $^{13}\text{C NMR}$  (100 MHz,  $\text{CDCl}_3$ )  $\delta$  187.5, 145.1, 139.5, 136.8, 135.9, 134.0, 132.3, 131.3 (d,  $J = 9.4$  Hz), 129.6, 129.2, 128.9 (d,  $J = 11.9$  Hz), 21.8;  $^{31}\text{P NMR}$  (162 MHz,  $\text{CDCl}_3$ )  $\delta$  22.6; HRMS (ESI-TOF)  $m/z$ :  $[\text{M} + \text{H}]^+$  Calcd for  $\text{C}_{22}\text{H}_{20}\text{O}_2\text{P}$  347.1195; Found 347.1205.

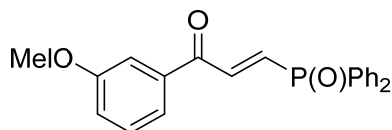

**(E)-3-(Diphenylphosphoryl)-1-(3-methoxyphenyl)prop-2-en-1-one (5c)**. Eluent:  $V_{EA}/V_{PE} = 2:3$ ; Yellow liquid (32.4 mg, 45% yield);  $^1\text{H NMR}$  (400 MHz,  $\text{CDCl}_3$ )  $\delta$  8.04 (t,  $J = 16.9$  Hz, 1H), 7.79-7.71 (m, 4H), 7.71-7.61 (m, 2H), 7.60-7.48 (m, 7H), 7.40 (t,  $J = 7.9$  Hz, 1H), 7.20-7.10 (m, 1H), 3.86 (s, 3H);  $^{13}\text{C NMR}$  (100 MHz,  $\text{CDCl}_3$ )  $\delta$  187.9 (d,  $J = 16.1$  Hz), 160.1, 139.4, 137.8, 137.3, 136.3, 132.4, 131.3 (d,  $J = 9.6$  Hz), 129.9,

128.9 (d,  $J = 12.1$  Hz), 121.8, 120.8, 112.8, 55.5;  $^{31}\text{P}$  NMR (162 MHz,  $\text{CDCl}_3$ )  $\delta$  22.7; HRMS (ESI-TOF)  $m/z$ :  $[\text{M} + \text{H}]^+$  Calcd for  $\text{C}_{22}\text{H}_{20}\text{O}_3\text{P}$  363.1145; Found 363.1146.

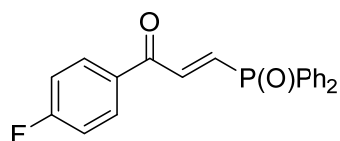

**(E)-3-(Diphenylphosphoryl)-1-(4-fluorophenyl)prop-2-en-1-one (5d).** Eluent:  $V_{\text{EA}}/V_{\text{PE}} = 1:2$ ; White solid (42.3 mg, 60% yield); mp 143-145 °C;  $^1\text{H}$  NMR (400 MHz,  $\text{CDCl}_3$ )  $\delta$  8.14-7.98 (m, 3H), 7.75 (t,  $J = 9.6$  Hz, 4H), 7.70-7.60 (m, 1H), 7.57 (t,  $J = 7.3$  Hz, 2H), 7.50 (t,  $J = 7.4$  Hz, 4H), 7.17 (t,  $J = 8.4$  Hz, 2H);  $^{13}\text{C}$  NMR (100 MHz,  $\text{CDCl}_3$ )  $\delta$  186.5 (d,  $J = 18.1$  Hz), 166.2 (d,  $J = 256.8$  Hz), 138.9, 137.6, 136.7 (d,  $J = 2.8$  Hz), 132.9 (d,  $J = 2.3$  Hz), 132.4, 131.8 (d,  $J = 9.6$  Hz), 131.3 (d,  $J = 9.2$  Hz), 128.9 (d,  $J = 11.6$  Hz), 116.1 (d,  $J = 22.0$  Hz);  $^{31}\text{P}$  NMR (162 MHz,  $\text{CDCl}_3$ )  $\delta$  22.4;  $^{19}\text{F}$  NMR (376 MHz,  $\text{CDCl}_3$ )  $\delta$  -103.20; HRMS (ESI-TOF)  $m/z$ :  $[\text{M} + \text{H}]^+$  Calcd for  $\text{C}_{21}\text{H}_{17}\text{FO}_2\text{P}$  351.0945; Found 351.0945.

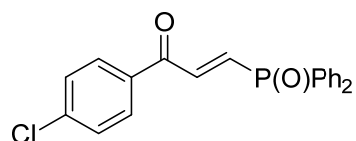

**(E)-1-(4-Chlorophenyl)-3-(diphenylphosphoryl)prop-2-en-1-one (5e).** Eluent:  $V_{\text{EA}}/V_{\text{PE}} = 1:2$ ; White solid (42.3 mg, 58% yield); mp 177-179 °C;  $^1\text{H}$  NMR (400 MHz,  $\text{CDCl}_3$ )  $\delta$  8.10-7.96 (m, 3H), 7.78-7.71 (m, 4H), 7.69-7.54 (m, 3H), 7.54-7.43 (m, 6H);  $^{13}\text{C}$  NMR (100 MHz,  $\text{CDCl}_3$ )  $\delta$  186.9 (d,  $J = 16.6$  Hz), 140.6, 138.7, 137.8, 136.9, 134.7, 132.5, 131.3 (d,  $J = 10.0$  Hz), 130.4, 129.3, 128.9 (d,  $J = 12.4$  Hz);  $^{31}\text{P}$  NMR (162 MHz,  $\text{CDCl}_3$ )  $\delta$  22.3; HRMS (ESI-TOF)  $m/z$ :  $[\text{M} + \text{H}]^+$  Calcd for  $\text{C}_{21}\text{H}_{17}\text{ClO}_2\text{P}$  367.0649; Found 367.0651.

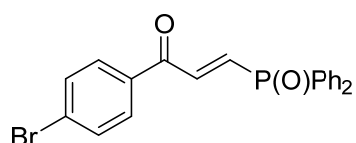

**(E)-1-(4-Bromophenyl)-3-(diphenylphosphoryl)prop-2-en-1-one (5f).** Eluent:  $V_{\text{EA}}/V_{\text{PE}} = 2:3$ ; White solid (45.7 mg, 56% yield); mp 182-184 °C;  $^1\text{H}$  NMR (400 MHz,  $\text{CDCl}_3$ )  $\delta$  8.03 (t,  $J = 16.8$  Hz, 1H), 7.91 (d,  $J = 8.2$  Hz, 2H), 7.78-7.71 (m, 4H), 7.64

(d,  $J = 8.1$  Hz, 3H), 7.60-7.55 (m, 2H), 7.50 (t,  $J = 7.1$  Hz, 4H);  $^{13}\text{C}$  NMR (100 MHz,  $\text{CDCl}_3$ )  $\delta$  187.1 (d,  $J = 16.5$  Hz), 138.7, 137.9, 137.0, 135.1, 132.4, 132.2, 131.3 (d,  $J = 9.7$  Hz), 130.5, 129.3, 128.9 (d,  $J = 12.0$  Hz);  $^{31}\text{P}$  NMR (162 MHz,  $\text{CDCl}_3$ )  $\delta$  22.4; HRMS (ESI-TOF)  $m/z$ :  $[\text{M} + \text{H}]^+$  Calcd for  $\text{C}_{21}\text{H}_{17}\text{BrO}_2\text{P}$  411.0144; Found 411.0143.

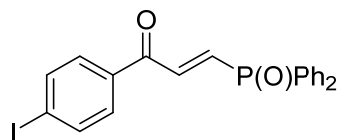

**(E)-3-(Diphenylphosphoryl)-1-(4-iodophenyl)prop-2-en-1-one (5g).** Eluent:  $V_{\text{EA}}/V_{\text{PE}} = 2:3$ ; White solid (48.8 mg, 53% yield); mp 204-206 °C;  $^1\text{H}$  NMR (400 MHz,  $\text{CDCl}_3$ )  $\delta$  8.02 (t,  $J = 16.1$  Hz, 1H), 7.87 (d,  $J = 8.2$  Hz, 2H), 7.75 (d,  $J = 8.4$  Hz, 7H), 7.58 (t,  $J = 7.3$  Hz, 2H), 7.50 (t,  $J = 7.2$  Hz, 4H);  $^{13}\text{C}$  NMR (100 MHz,  $\text{CDCl}_3$ )  $\delta$  187.3 (d,  $J = 14.0$  Hz), 138.6, 138.3, 138.0, 135.7, 132.5, 132.2, 131.3 (d,  $J = 7.7$  Hz), 130.3, 128.9 (d,  $J = 10.3$  Hz), 102.3;  $^{31}\text{P}$  NMR (162 MHz,  $\text{CDCl}_3$ )  $\delta$  22.7; HRMS (ESI-TOF)  $m/z$ :  $[\text{M} + \text{H}]^+$  Calcd for  $\text{C}_{21}\text{H}_{17}\text{IO}_2\text{P}$  459.0005; Found 459.0009.

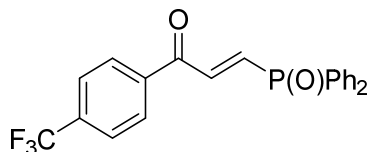

**(E)-3-(Diphenylphosphoryl)-1-(4-(trifluoromethyl)phenyl)prop-2-en-1-one (5h).** Eluent:  $V_{\text{EA}}/V_{\text{PE}} = 2:3$ ; White solid (46.6 mg, 58% yield); mp 155-157 °C;  $^1\text{H}$  NMR (400 MHz,  $\text{CDCl}_3$ )  $\delta$  8.15 (d,  $J = 8.0$  Hz, 2H), 8.06 (t,  $J = 16.3$  Hz, 1H), 7.76 (t,  $J = 9.2$  Hz, 7H), 7.61-7.56 (m, 2H), 7.52 (t,  $J = 7.1$  Hz, 4H);  $^{13}\text{C}$  NMR (100 MHz,  $\text{CDCl}_3$ )  $\delta$  187.3 (d,  $J = 16.1$  Hz), 139.1, 138.8, 138.5, 137.9, 135.0 (d,  $J = 33.0$  Hz), 132.5, 131.3 (d,  $J = 7.7$  Hz), 129.3, 129.0 (d,  $J = 10.7$  Hz), 126.0 – 125.8 (m), 123.4 (d,  $J = 272.8$  Hz);  $^{31}\text{P}$  NMR (162 MHz,  $\text{CDCl}_3$ )  $\delta$  22.4;  $^{19}\text{F}$  NMR (376 MHz,  $\text{CDCl}_3$ )  $\delta$  -63.24; HRMS (ESI-TOF)  $m/z$ :  $[\text{M} + \text{H}]^+$  Calcd for  $\text{C}_{22}\text{H}_{17}\text{F}_3\text{O}_2\text{P}$  401.0913; Found 401.0914.

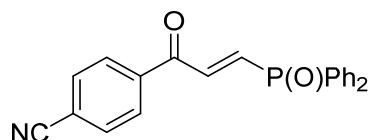

**(E)-4-(3-(Diphenylphosphoryl)acryloyl)benzonitrile (5i).** Eluent:  $V_{\text{EA}}/V_{\text{PE}} = 1:1$ ; Yellow liquid (37.3 mg, 52% yield);  $^1\text{H}$  NMR (400 MHz,  $\text{CDCl}_3$ )  $\delta$  8.18-7.98 (m, 3H),

7.85-7.64 (m, 7H), 7.61-7.52 (m, 6H);  $^{13}\text{C}$  NMR (100 MHz,  $\text{CDCl}_3$ )  $\delta$  186.9 (d,  $J = 16.8$  Hz), 139.3 (d,  $J = 22.7$  Hz), 138.1 (d,  $J = 16.4$  Hz), 132.7, 132.6, 131.7, 131.2 (d,  $J = 10.1$  Hz), 130.6, 129.3, 129.0 (d,  $J = 12.4$  Hz), 117.7, 117.0;  $^{31}\text{P}$  NMR (162 MHz,  $\text{CDCl}_3$ )  $\delta$  22.2; HRMS (ESI-TOF)  $m/z$ :  $[\text{M} + \text{H}]^+$  Calcd for  $\text{C}_{22}\text{H}_{17}\text{NO}_2\text{P}$  358.0991; Found 358.0996.

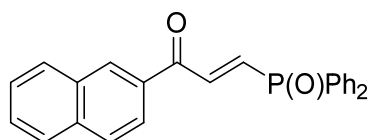

**(E)-3-(Diphenylphosphoryl)-1-(naphthalen-2-yl)prop-2-en-1-one (5j).** Eluent:  $V_{\text{EA}}/V_{\text{PE}} = 2:3$ ; White solid (38.5 mg, 50% yield); mp 175-177 °C;  $^1\text{H}$  NMR (400 MHz,  $\text{CDCl}_3$ )  $\delta$  8.63 (s, 1H), 8.30 (t,  $J = 16.7$  Hz, 1H), 8.10 (d,  $J = 8.6$  Hz, 1H), 7.98 (d,  $J = 8.0$  Hz, 1H), 7.94-7.85 (m, 2H), 7.82-7.69 (m, 5H), 7.62 (t,  $J = 7.5$  Hz, 1H), 7.60-7.54 (m, 3H), 7.51 (t,  $J = 7.1$  Hz, 4H);  $^{13}\text{C}$  NMR (100 MHz,  $\text{CDCl}_3$ )  $\delta$  187.8 (d,  $J = 14.3$  Hz), 139.3, 137.1, 136.2 (d,  $J = 2.4$  Hz), 135.9, 133.8, 132.5, 132.4, 131.5, 131.3 (d,  $J = 8.6$  Hz), 129.8, 129.1, 129.0, 128.9, 127.8, 127.1, 124.1;  $^{31}\text{P}$  NMR (162 MHz,  $\text{CDCl}_3$ )  $\delta$  22.7; HRMS (ESI-TOF)  $m/z$ :  $[\text{M} + \text{H}]^+$  Calcd for  $\text{C}_{25}\text{H}_{20}\text{O}_2\text{P}$  383.1195; Found 383.1205.

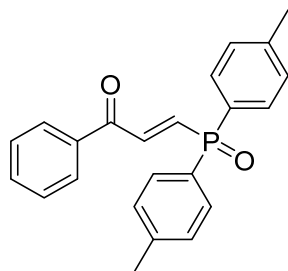

**(E)-3-(Di-p-tolylphosphoryl)-1-phenylprop-2-en-1-one (5k).** Eluent:  $V_{\text{EA}}/V_{\text{PE}} = 1:1$ ; Yellow liquid (36.3 mg, 50% yield);  $^1\text{H}$  NMR (400 MHz,  $\text{CDCl}_3$ )  $\delta$  8.04 (d,  $J = 8.4$  Hz, 3H), 7.67-7.58 (m, 6H), 7.49 (t,  $J = 7.6$  Hz, 2H), 7.30 (d,  $J = 7.4$  Hz, 4H), 2.40 (s, 6H);  $^{13}\text{C}$  NMR (100 MHz,  $\text{CDCl}_3$ )  $\delta$  188.3 (d,  $J = 16.5$  Hz), 142.9, 138.9, 137.9, 136.9, 136.5, 133.8, 131.3 (d,  $J = 10.1$  Hz), 129.6 (d,  $J = 12.5$  Hz), 128.9 (d,  $J = 17.6$  Hz), 128.0, 21.6;  $^{31}\text{P}$  NMR (162 MHz,  $\text{CDCl}_3$ )  $\delta$  23.0; HRMS (ESI-TOF)  $m/z$ :  $[\text{M} + \text{H}]^+$  Calcd for  $\text{C}_{23}\text{H}_{22}\text{O}_2\text{P}$  361.1352; Found 361.1359.

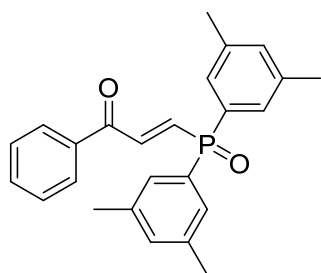

**(E)-3-(Bis(3,5-dimethylphenyl)phosphoryl)-1-phenylprop-2-en-1-one (5l).** Eluent:  $V_{EA}/V_{PE} = 2:3$ ; White solid (40.6 mg, 52% yield); mp 133-135 °C;  $^1\text{H}$  NMR (400 MHz,  $\text{CDCl}_3$ )  $\delta$  8.06 (d,  $J = 7.7$  Hz, 3H), 7.61 (t,  $J = 7.4$  Hz, 2H), 7.49 (t,  $J = 7.5$  Hz, 2H), 7.35 (d,  $J = 9.0$  Hz, 4H), 7.17 (s, 2H), 2.34 (s, 12H);  $^{13}\text{C}$  NMR (100 MHz,  $\text{CDCl}_3$ )  $\delta$  188.3 (d,  $J = 11.5$  Hz), 138.9, 138.81, 138.77, 136.5, 134.2, 134.1, 133.8, 129.1, 128.9, 128.8, 21.3;  $^{31}\text{P}$  NMR (162 MHz,  $\text{CDCl}_3$ )  $\delta$  22.9; HRMS (ESI-TOF)  $m/z$ :  $[\text{M} + \text{H}]^+$  Calcd for  $\text{C}_{25}\text{H}_{26}\text{O}_2\text{P}$  389.1665; Found 389.1667.

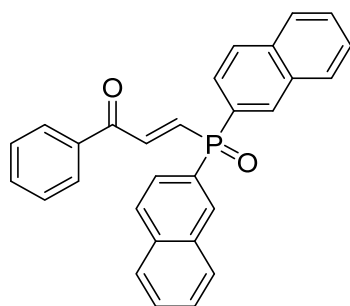

**(E)-3-(Di(naphthalen-2-yl)phosphoryl)-1-phenylprop-2-en-1-one (5m).** Eluent:  $V_{EA}/V_{PE} = 1:1$ ; White solid (38.7 mg, 45% yield); mp 173-175 °C;  $^1\text{H}$  NMR (400 MHz,  $\text{CDCl}_3$ )  $\delta$  8.42 (d,  $J = 13.1$  Hz, 2H), 8.18 (t,  $J = 16.8$  Hz, 1H), 8.07 (d,  $J = 7.7$  Hz, 2H), 7.95-7.81 (m, 7H), 7.71 (t,  $J = 8.4$  Hz, 2H), 7.63-7.55 (m, 5H), 7.49 (t,  $J = 7.5$  Hz, 2H);  $^{13}\text{C}$  NMR (100 MHz,  $\text{CDCl}_3$ )  $\delta$  188.2 (d,  $J = 15.0$  Hz), 139.6, 137.3, 136.5, 134.9, 133.9, 133.4 (d,  $J = 7.5$  Hz), 132.6 (d,  $J = 12.2$  Hz), 129.4, 129.1, 129.0, 128.9, 128.8, 128.5, 127.9, 127.2, 125.9 (d,  $J = 9.5$  Hz);  $^{31}\text{P}$  NMR (162 MHz,  $\text{CDCl}_3$ )  $\delta$  23.0; HRMS (ESI-TOF)  $m/z$ :  $[\text{M} + \text{H}]^+$  Calcd for  $\text{C}_{29}\text{H}_{22}\text{O}_2\text{P}$  433.1352; Found 433.1351.

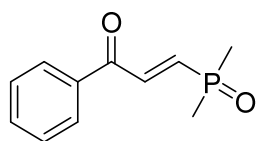

**(E)-3-(Dimethylphosphoryl)-1-phenylprop-2-en-1-one (5n).** Eluent:  $V_{EA}/V_{PE} = 1:2$ ; Yellow liquid (25.1 mg, 60% yield);  $^1\text{H}$  NMR (400 MHz,  $\text{CDCl}_3$ )  $\delta$  8.11-8.01 (m, 2H),

8.00-7.90 (m, 1H), 7.63 (t,  $J = 7.4$  Hz, 1H), 7.51 (t,  $J = 7.7$  Hz, 2H), 7.26-7.13 (m, 1H), 1.68 (d,  $J = 13.2$  Hz, 6H);  $^{13}\text{C}$  NMR (100 MHz,  $\text{CDCl}_3$ )  $\delta$  188.2 (d,  $J = 16.3$  Hz), 138.9, 138.5, 137.6, 136.3, 133.9, 128.9 (d,  $J = 9.5$  Hz), 17.2 (d,  $J = 73.4$  Hz);  $^{31}\text{P}$  NMR (162 MHz,  $\text{CDCl}_3$ )  $\delta$  32.0; HRMS (ESI-TOF)  $m/z$ :  $[\text{M} + \text{H}]^+$  Calcd for  $\text{C}_{11}\text{H}_{14}\text{O}_2\text{P}$  209.0726; Found 209.0726.

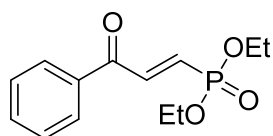

**Diethyl (*E*)-(3-oxo-3-phenylprop-1-en-1-yl)phosphonate (5o).**<sup>3</sup> Eluent:  $V_{\text{EA}}/V_{\text{PE}}=1:3$ ; Colorless liquid (21.3 mg, 40% yield);  $^1\text{H}$  NMR (400 MHz,  $\text{CDCl}_3$ )  $\delta$  8.01 (d,  $J = 7.7$  Hz, 2H), 7.90-7.78 (m, 1H), 7.63 (t,  $J = 7.3$  Hz, 1H), 7.52 (t,  $J = 7.6$  Hz, 2H), 7.04-6.87 (m, 1H), 4.31-4.08 (m, 4H), 1.37 (t,  $J = 7.0$  Hz, 6H);  $^{13}\text{C}$  NMR (100 MHz,  $\text{CDCl}_3$ )  $\delta$  188.5 (d,  $J = 22.9$  Hz), 140.2 (d,  $J = 6.2$  Hz), 136.3, 133.9, 131.6, 129.8, 128.9 (d,  $J = 3.3$  Hz), 62.5 (d,  $J = 5.5$  Hz), 16.4 (d,  $J = 6.2$  Hz);  $^{31}\text{P}$  NMR (162 MHz,  $\text{CDCl}_3$ )  $\delta$  15.8.

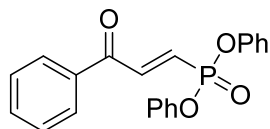

**Diphenyl (*E*)-(3-oxo-3-phenylprop-1-en-1-yl)phosphonate (5p).** Eluent:  $V_{\text{EA}}/V_{\text{PE}}=1:8$ ; Yellow liquid (29.3 mg, 40% yield);  $^1\text{H}$  NMR (400 MHz,  $\text{CDCl}_3$ )  $\delta$  8.04-7.91 (m, 3H), 7.61 (t,  $J = 7.4$  Hz, 1H), 7.48 (t,  $J = 7.7$  Hz, 2H), 7.34 (t,  $J = 7.9$  Hz, 4H), 7.27-7.10 (m, 7H);  $^{13}\text{C}$  NMR (100 MHz,  $\text{CDCl}_3$ )  $\delta$  187.9 (d,  $J = 23.1$  Hz), 149.9 (d,  $J = 7.7$  Hz), 142.5 (d,  $J = 6.7$  Hz), 136.0, 134.1, 130.0, 129.9, 129.0 (d,  $J = 4.5$  Hz), 128.0, 125.6, 120.6 (d,  $J = 4.5$  Hz);  $^{31}\text{P}$  NMR (162 MHz,  $\text{CDCl}_3$ )  $\delta$  8.9 (t,  $J = 21.8$  Hz); HRMS (ESI-TOF)  $m/z$ :  $[\text{M} + \text{H}]^+$  Calcd for  $\text{C}_{21}\text{H}_{18}\text{O}_4\text{P}$  365.0937; Found 365.0950.

### Procedure for the synthesis of 7

In a 25 mL sealed tube were added enamine **6** (0.2 mmol, 1 equiv), phosphine oxide **2a** (0.6 mmol, 3 equiv), TFA (0.6 mmol, 3 equiv) and  $\text{CH}_3\text{CN}$  (2 mL, 0.1 M). After sealing the tube with Teflon cap, the mixture was stirred at 60 °C with oil bath heating for 12 h. Upon completion (TLC), the reaction mixture was diluted with ethyl

acetate, and transferred into a round bottom flask. After removing the solvent at reduced temperature, the resulting mixture was purified by silica gel column chromatography with the elution of mixed dichloromethane and methanol (v: v=40:1).

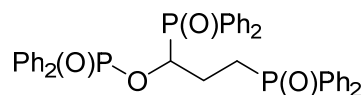

**1,3-Bis(diphenylphosphoryl)propyl diphenylphosphinate (7).** Eluent:  $V_{\text{DCM}}/V_{\text{MeOH}} = 40:1$ ; Yellow liquid (79.7 mg, 60% yield);  $^1\text{H NMR}$  (400 MHz,  $\text{CDCl}_3$ ) ;  $\delta$  7.89-7.79 (m, 2H), 7.76-7.65 (m, 4H), 7.57-7.43 (m, 8H), 7.43-7.33 (m, 10H), 7.33-7.28 (m, 4H), 7.23-7.17 (m, 2H), 5.68-5.49 (m, 1H), 2.60-2.35 (m, 2H), 2.28-2.12 (m, 2H);  $^{13}\text{C NMR}$  (100 MHz,  $\text{CDCl}_3$ )  $\delta$  132.51, 132.49, 132.46, 132.4, 132.0, 131.9, 131.8, 131.4, 131.33, 131.30, 131.2, 131.1, 131.0, 130.8, 130.72, 130.69, 130.6, 128.9, 128.8, 128.6, 128.5, 128.4, 128.2, 100.0, 25.8 (d,  $J = 64.6$  Hz), 23.1;  $^{31}\text{P NMR}$  (162 MHz,  $\text{CDCl}_3$ )  $\delta$  34.7, 33.5, 31.2; HRMS (ESI-TOF)  $m/z$ :  $[\text{M} + \text{H}]^+$  Calcd for  $\text{C}_{39}\text{H}_{36}\text{O}_4\text{P}_3$  661.1821; Found 661.1835.

### Procedure for the synthesis of 8

Compound **4a** (0.2 mmol) was dissolved in MeOH (2 mL) in a 25 mL round-bottom flask. To this solution was slowly added  $\text{NaBH}_4$  (0.4 mmol) in 3 mins. The mixture was stirred at room temperature for 12 h. The pH was then adjusted to 3 with 10% (m/m) aqueous HCl solution. The mixture was extracted with ethyl acetate ( $3 \times 10$  mL). The combined organic phase was successively washed with saturated sodium bicarbonate solution and brine for three times and dried with anhydrous  $\text{Na}_2\text{SO}_4$ . After filtration, the solvent was removed under reduced pressure, and the resulting residue was purified by flash column chromatography to give pure product by using mixed ethyl acetate and petroleum ether (v/v = 1:1) as eluent.

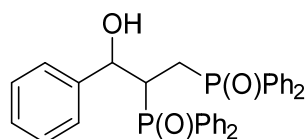

**(3-Hydroxy-3-phenylpropane-1,2-diyl)bis(diphenylphosphine oxide) (8).** Eluent:  $V_{EA}/V_{PE} = 1:1$ ; White solid (66.9 mg, 62% yield); mp 201-203 °C;  $^1\text{H}$  NMR (400 MHz,  $\text{CDCl}_3$ )  $\delta$  7.78-7.71 (m, 2H), 7.58-7.51 (m, 5H), 7.47 (d,  $J = 7.6$  Hz, 3H), 7.43-7.32 (m, 10H), 7.31-7.27 (m, 2H), 7.16 (t,  $J = 7.6$  Hz, 2H), 7.06 (t,  $J = 7.3$  Hz, 1H), 6.74 (d,  $J = 9.8$  Hz, 1H), 5.34-5.11 (m, 1H), 3.45-3.25 (m, 1H), 2.97-2.82 (m, 1H), 2.40-2.28 (m, 1H);  $^{13}\text{C}$  NMR (100 MHz,  $\text{CDCl}_3$ )  $\delta$  140.9, 132.3 (d,  $J = 2.4$  Hz), 132.0 (d,  $J = 3.0$  Hz), 131.7 (d,  $J = 2.4$  Hz), 131.6 (d,  $J = 2.5$  Hz), 131.1, 131.0, 130.7, 130.64, 130.57, 128.93, 128.90, 128.84, 128.81, 128.78, 128.72, 128.67, 127.8, 127.1, 126.9, 72.7, 40.4 (d,  $J = 64.0$  Hz), 25.0 (d,  $J = 67.5$  Hz);  $^{31}\text{P}$  NMR (162 MHz,  $\text{CDCl}_3$ )  $\delta$  35.9 (d,  $J = 33.5$  Hz), 33.9 (d,  $J = 33.6$  Hz); HRMS (ESI-TOF)  $m/z$ :  $[\text{M} + \text{H}]^+$  Calcd for  $\text{C}_{33}\text{H}_{31}\text{O}_3\text{P}_2$  537.1743; Found 537.1746.

### Procedure for the synthesis of 10

In a 15 mL reaction tube was equipped with **5a** (0.2 mmol), morpholine **9** (0.4 mmol) and MeCN (2 mL). The mixture was then stirred at room temperature for 4 h. Upon completion (TLC), the reaction mixture was diluted with ethyl acetate, and transferred into a round bottom flask. After removing the solvent at reduced temperature, the resulting mixture was purified by silica gel column chromatography with the elution of mixed petroleum ether and ethyl acetate (v:v = 1:2).

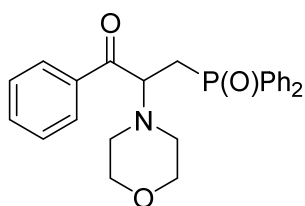

**3-(Diphenylphosphoryl)-2-morpholino-1-phenylpropan-1-one (10).** Eluent:  $V_{EA}/V_{PE}=1:2$ ; White solid (73.5 mg, 88% yield); mp 167-169 °C;  $^1\text{H}$  NMR (400 MHz,  $\text{CDCl}_3$ )  $\delta$  7.98-7.82 (m, 6H), 7.57-7.47 (m, 4H), 7.42 (d,  $J = 15.3$  Hz, 5H), 4.52-4.47 (m, 1H), 3.78-3.70 (m, 1H), 3.45 (s, 4H), 3.16-3.08 (m, 1H), 2.96-2.89 (m, 2H), 2.56-2.50 (m, 2H);  $^{13}\text{C}$  NMR (100 MHz,  $\text{CDCl}_3$ )  $\delta$  197.8 (d,  $J = 11.8$  Hz), 136.2, 133.5, 131.9 (d,  $J = 2.8$  Hz), 131.6 (d,  $J = 2.8$  Hz), 131.5, 131.4, 131.0 (d,  $J = 8.5$  Hz), 128.8, 128.6, 128.3, 128.2, 128.1, 67.2, 59.5 (d,  $J = 89.2$  Hz), 51.4 (d,  $J = 6.5$  Hz), 31.5 (d,  $J = 8.1$



Hz);  $^{31}\text{P}$  NMR (162 MHz,  $\text{CDCl}_3$ )  $\delta$  32.9; HRMS (ESI-TOF)  $m/z$ :  $[\text{M} + \text{H}]^+$  Calcd for  $\text{C}_{25}\text{H}_{27}\text{NO}_3\text{P}$  420.1723; Found 420.1727.

### Procedure for the synthesis of 12

In a 15 mL reaction tube was equipped with **5a** (0.2 mmol), hydrazine hydrate (0.4 mmol) and toluene (2 mL). The mixture was then stirred at room temperature for 12 h. Upon completion (TLC), the reaction mixture was diluted with ethyl acetate, and transferred into a round bottom flask. After removing the solvent at reduced pressure, the resulting mixture was purified by silica gel column chromatography with the election of mixed petroleum ether and ethyl acetate (v: v=1:1).

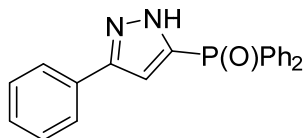

**Diphenyl(3-phenyl-1H-pyrazol-5-yl)phosphine oxide (12)**. Eluent:  $V_{\text{EA}}/V_{\text{PE}}=1:1$ ; White solid (48.2 mg, 70% yield); mp 179-181 °C;  $^1\text{H}$  NMR (400 MHz,  $\text{CDCl}_3$ )  $\delta$  7.80 – 7.71 (m, 6H), 7.54 (t,  $J = 7.3$  Hz, 2H), 7.47 – 7.41 (m, 4H), 7.38 (t,  $J = 7.4$  Hz, 2H), 7.31 (t,  $J = 7.3$  Hz, 1H), 6.79 (s, 1H);  $^{13}\text{C}$  NMR (100 MHz,  $\text{CDCl}_3$ )  $\delta$  132.2 (d,  $J = 2.9$  Hz), 131.8 (d,  $J = 10.6$  Hz), 130.8 (d,  $J = 9.5$  Hz), 128.9, 128.8, 128.6, 128.5, 128.3, 128.1, 125.9, 109.6 (d,  $J = 17.3$  Hz);  $^{31}\text{P}$  NMR (162 MHz,  $\text{CDCl}_3$ )  $\delta$  19.6; HRMS (ESI-TOF)  $m/z$ :  $[\text{M} + \text{H}]^+$  Calcd for  $\text{C}_{21}\text{H}_{18}\text{N}_2\text{OP}$  345.1151; Found 345.1154.

### References

1. (a) H. Guo, L. Tian, Y. Liu and J.-P. Wan, *Org. Lett.*, 2022, **24**, 228-233. (b) J. Ying, T. Liu, Y. Liu and J.-P. Wan, *Org. Lett.*, 2022, **24**, 2404-2408.
2. E. T. Glotova, M. Y. Dvorko, N. S. Arbuzova, A. I. Ushakov, I. S. Verkhoturova, K. N. Gusarova and A. B. Trofimov, *Lett. Org. Chem.*, 2007, **4**, 109-111.
3. T. Liu, L. Wei, B. Zhao, Y. Liu and J.-P. Wan, *J. Org. Chem.*, 2021, **86**, 9861-9868.

# NMR spectra of all products

xzr-254. 1. fid

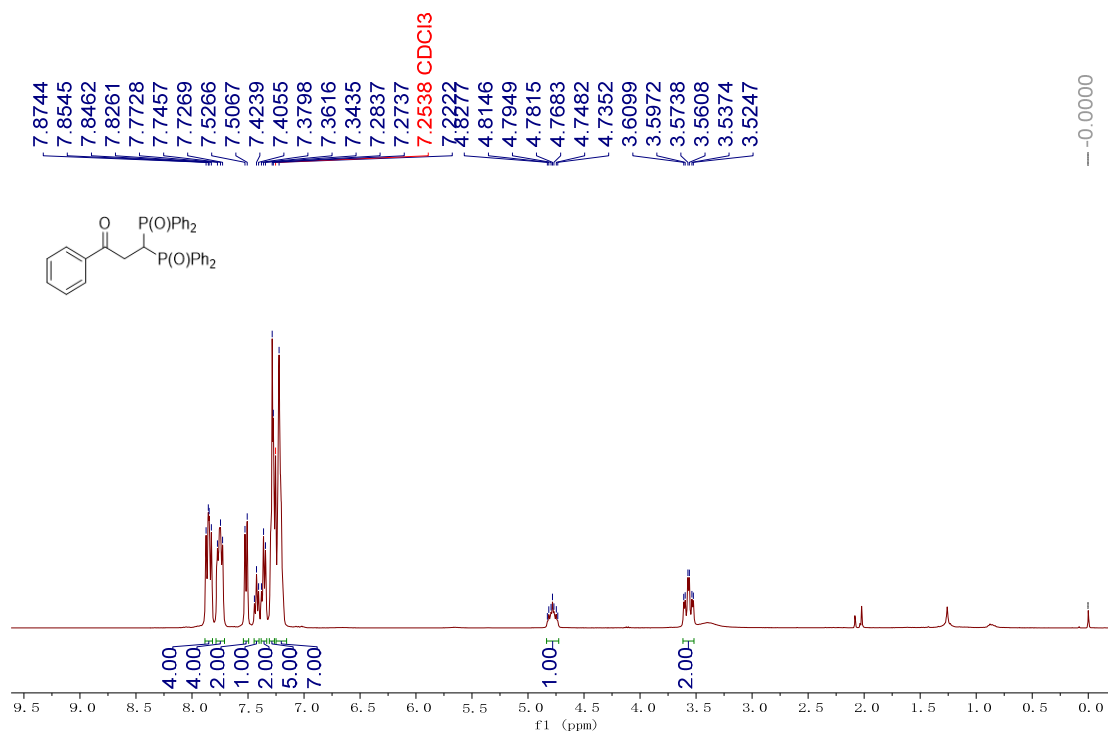

<sup>1</sup>H NMR spectrum of 3a (400 MHz, CDCl<sub>3</sub>)

xzr-254-c. 1. fid

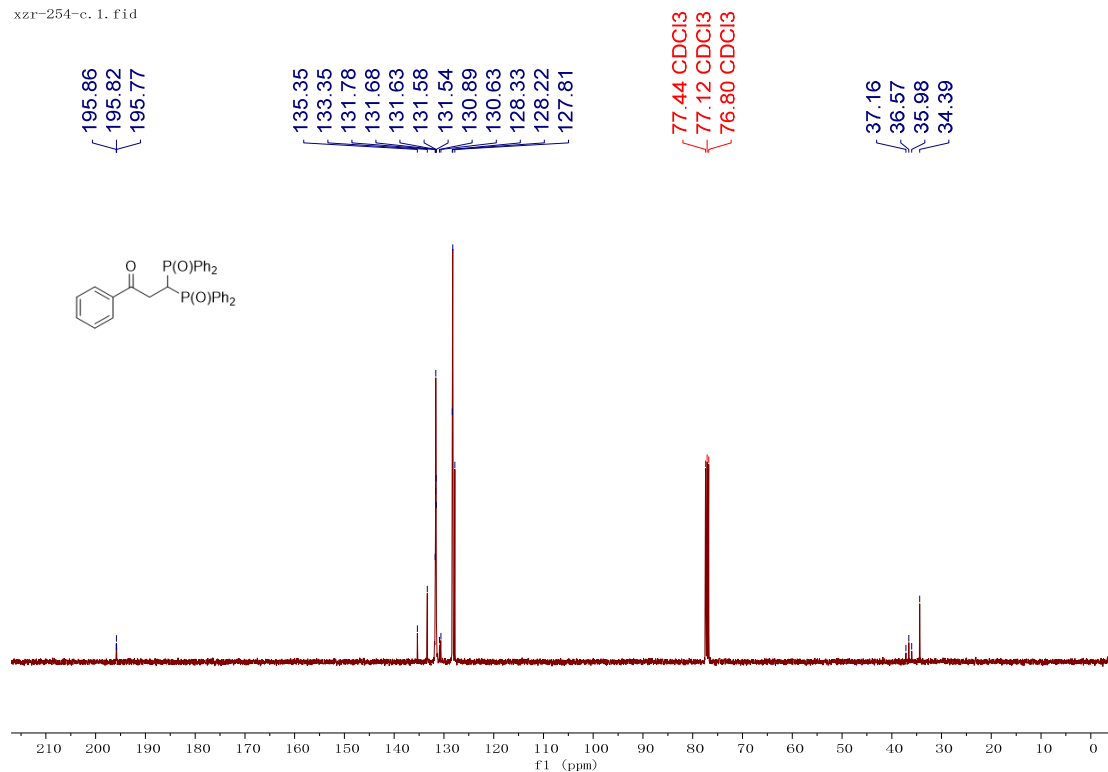

<sup>13</sup>C NMR spectrum of 3a (100 MHz, CDCl<sub>3</sub>)

xz1-254.2.fid

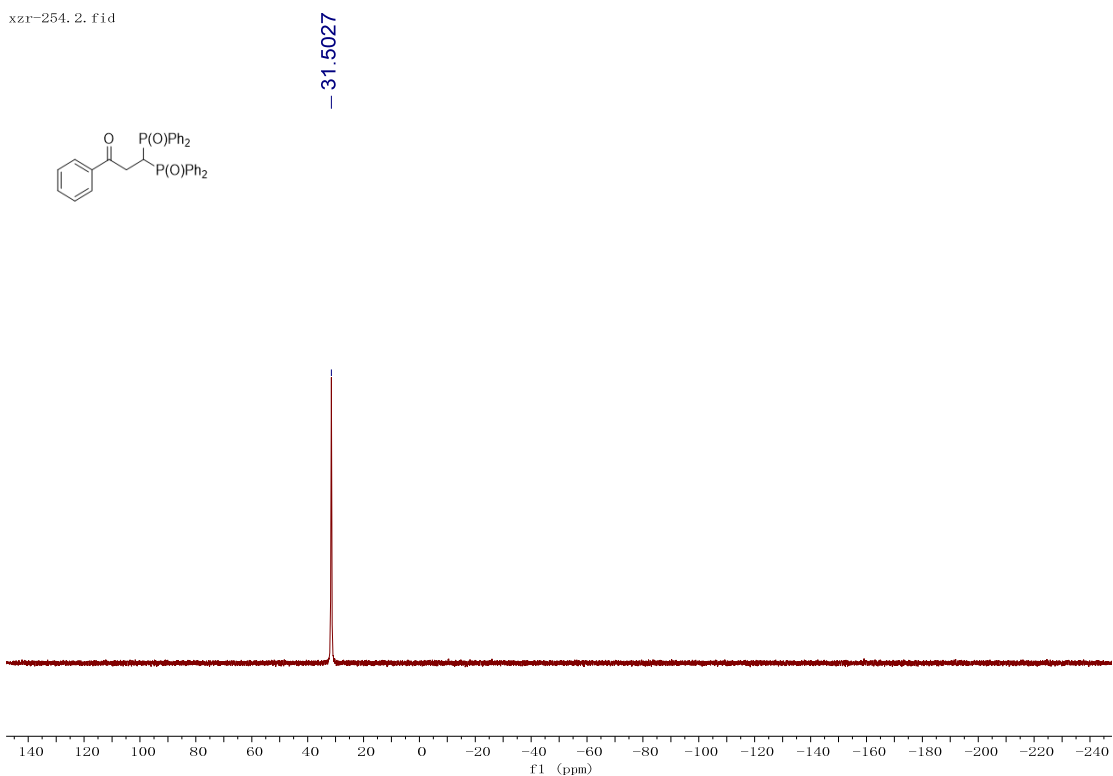

<sup>31</sup>P NMR spectrum of **3a** (162 MHz, CDCl<sub>3</sub>)

cds-16.1.fid

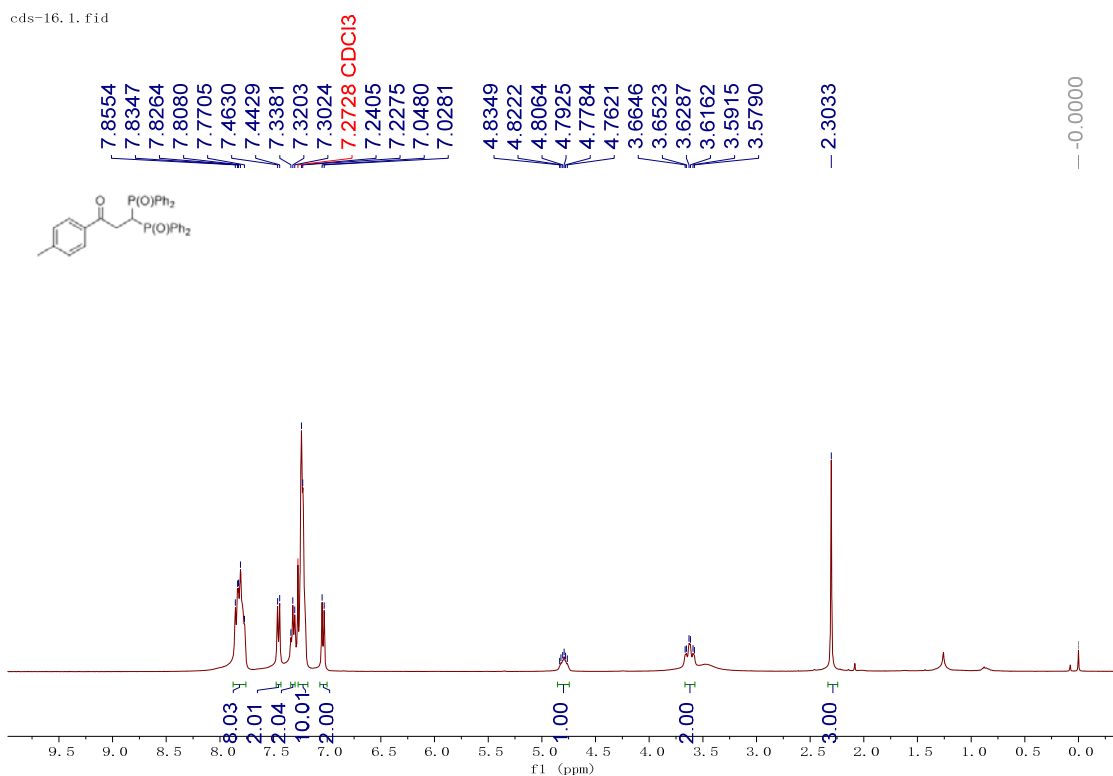

<sup>1</sup>H NMR spectrum of **3b** (400 MHz, CDCl<sub>3</sub>)

cds-17-2-c. 1. fid

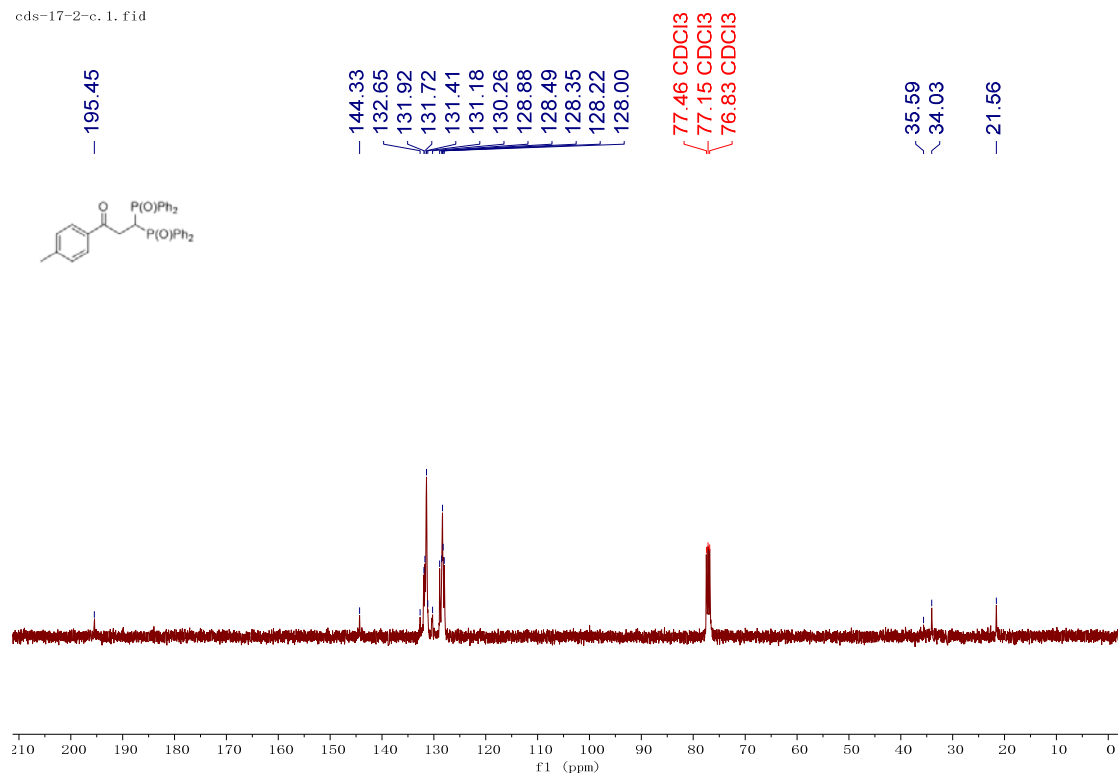

<sup>13</sup>C NMR spectrum of **3b** (100 MHz, CDCl<sub>3</sub>)

cds-16.2. fid

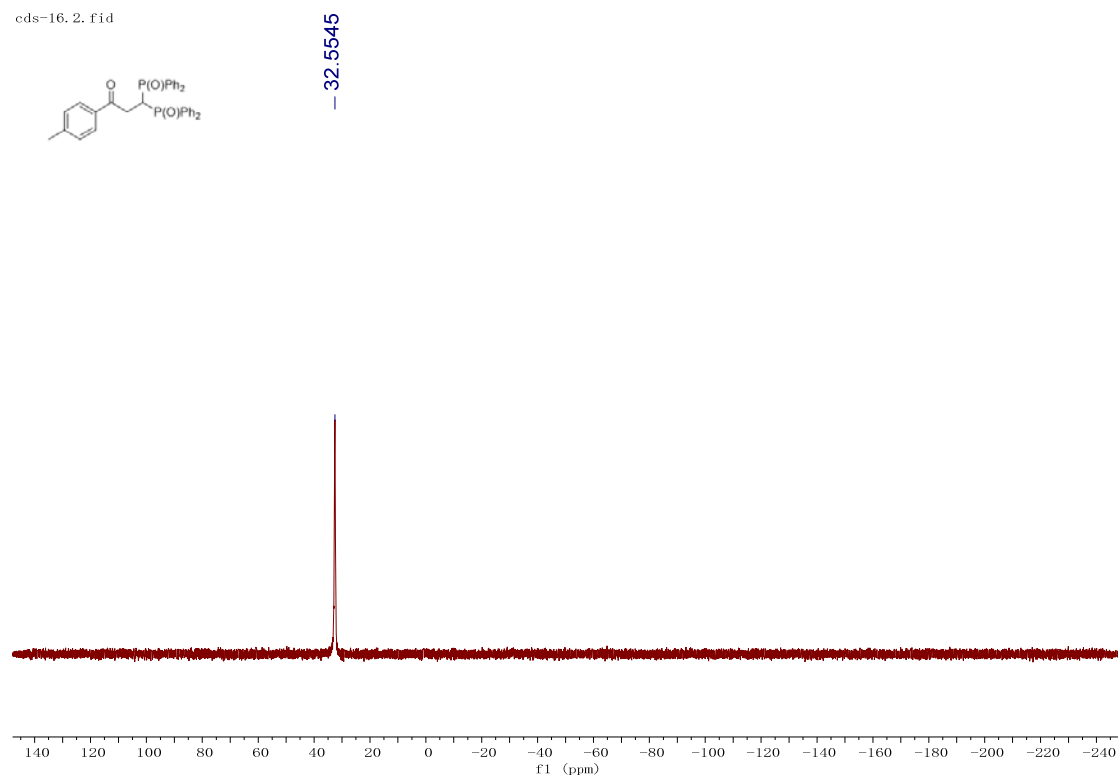

<sup>31</sup>P NMR spectrum of **3b** (162 MHz, CDCl<sub>3</sub>)

cds-17.1.fid

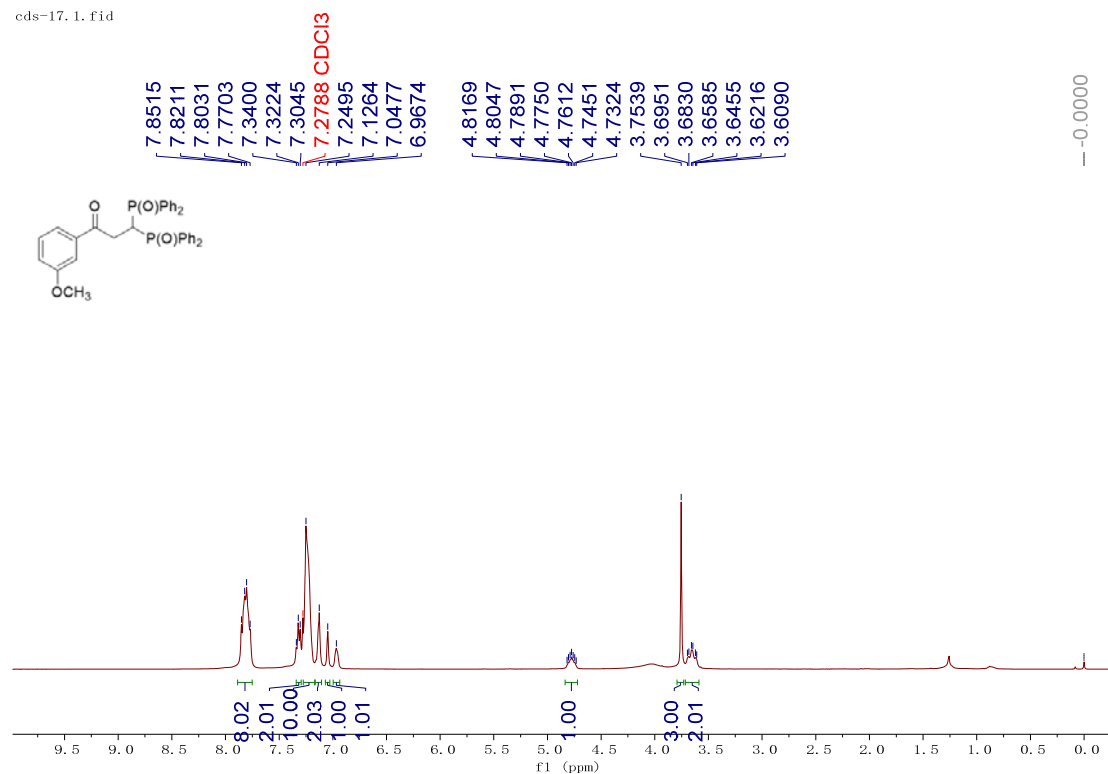

<sup>1</sup>H NMR spectrum of **3c** (400 MHz, CDCl<sub>3</sub>)

cds-17-c.1.fid

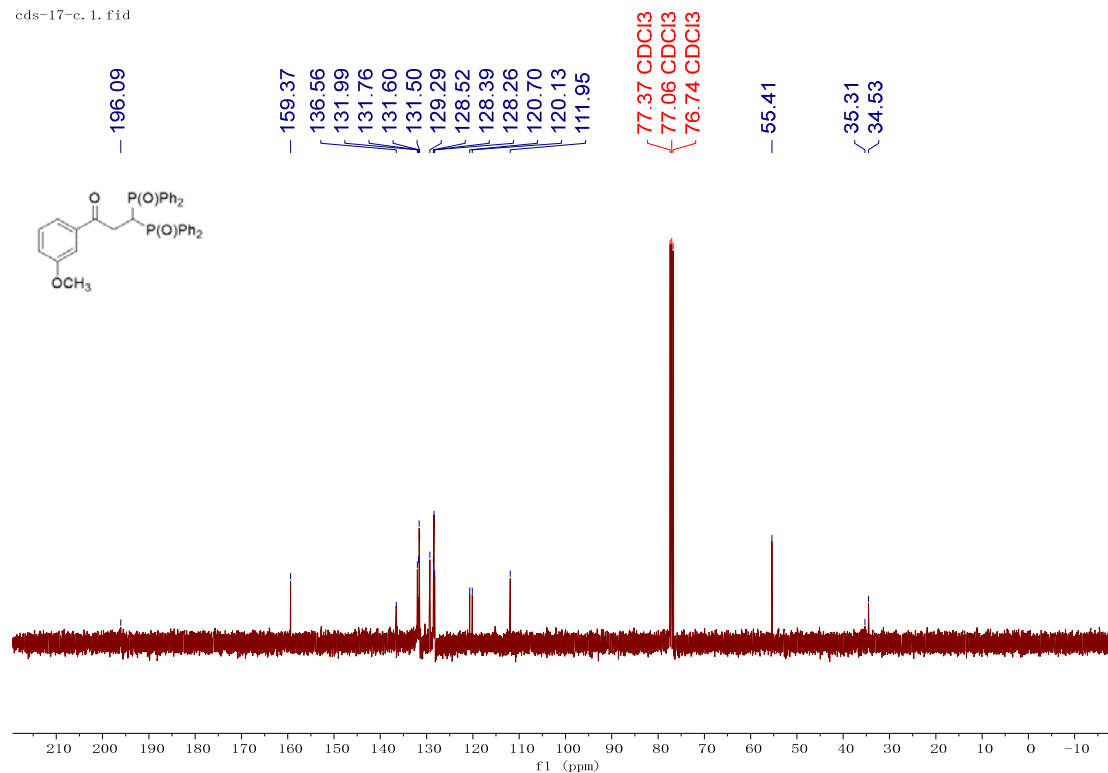

<sup>13</sup>C NMR spectrum of **3c** (100 MHz, CDCl<sub>3</sub>)

cds-17.2.fid

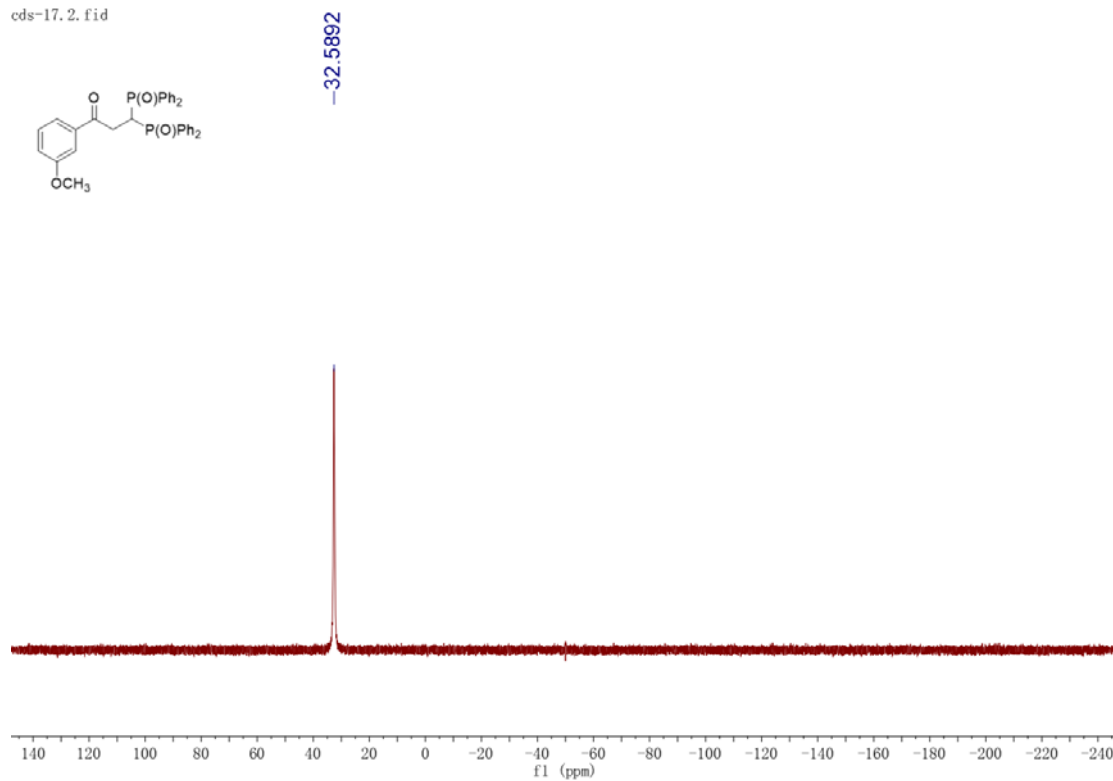

<sup>31</sup>P NMR spectrum of **3c** (162 MHz, CDCl<sub>3</sub>)

cds-21.1.fid

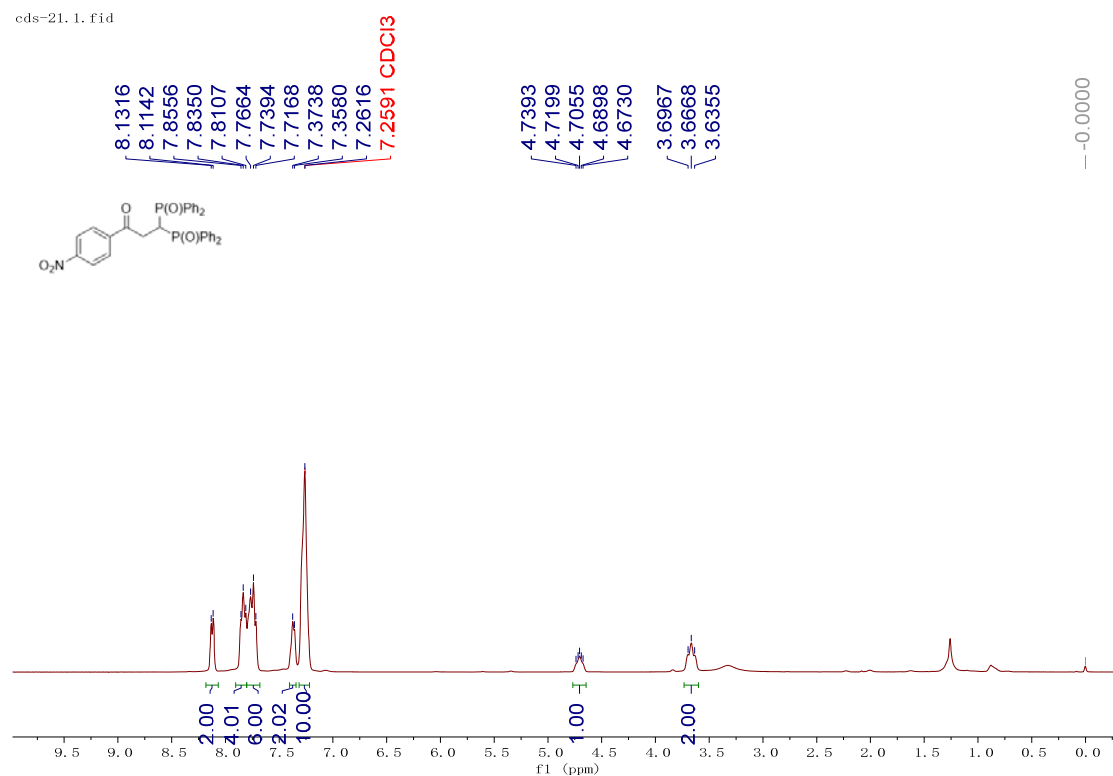

<sup>1</sup>H NMR spectrum of **3d** (400 MHz, CDCl<sub>3</sub>)

eds-21-c. 1. fid

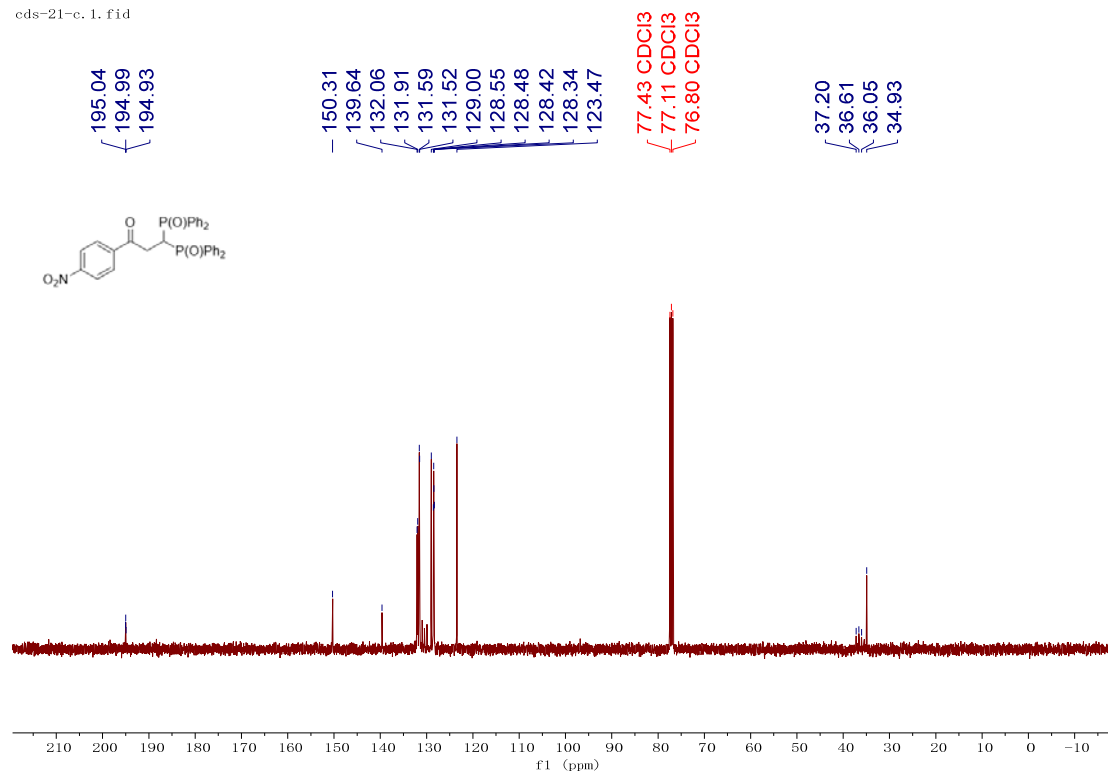

$^{13}\text{C}$  NMR spectrum of **3d** (100 MHz,  $\text{CDCl}_3$ )

eds-21. 2. fid

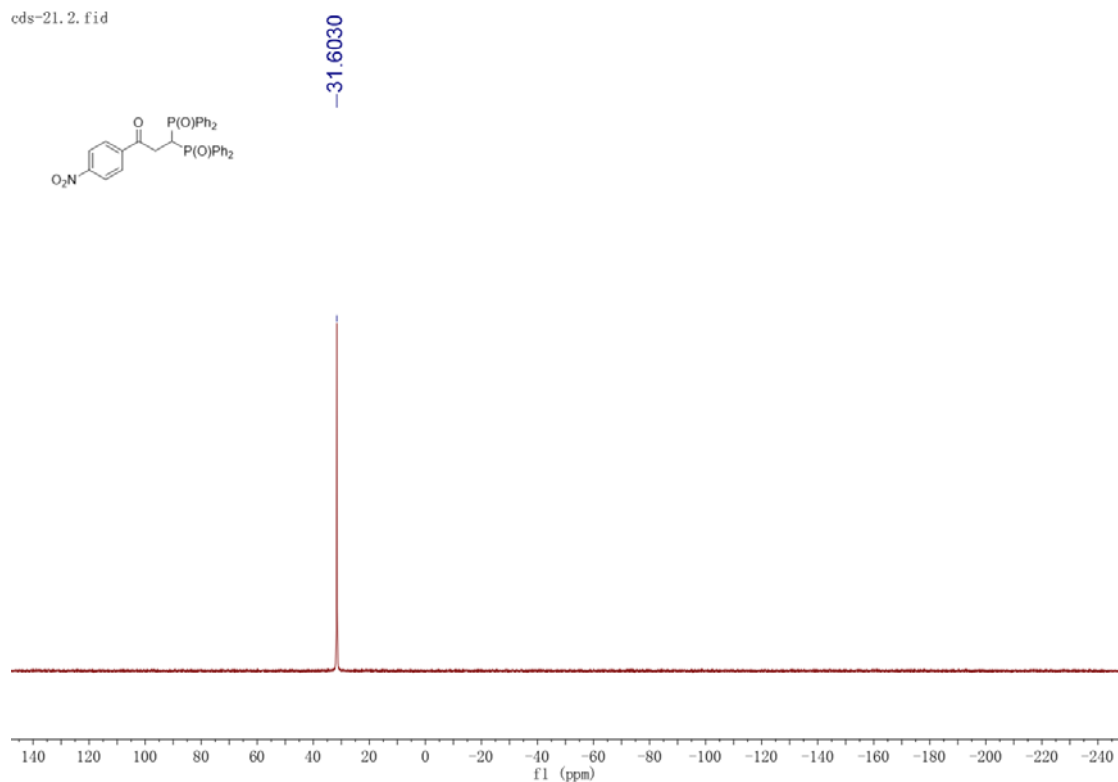

$^{31}\text{P}$  NMR spectrum of **3d** (162 MHz,  $\text{CDCl}_3$ )

cds-39.1.fid

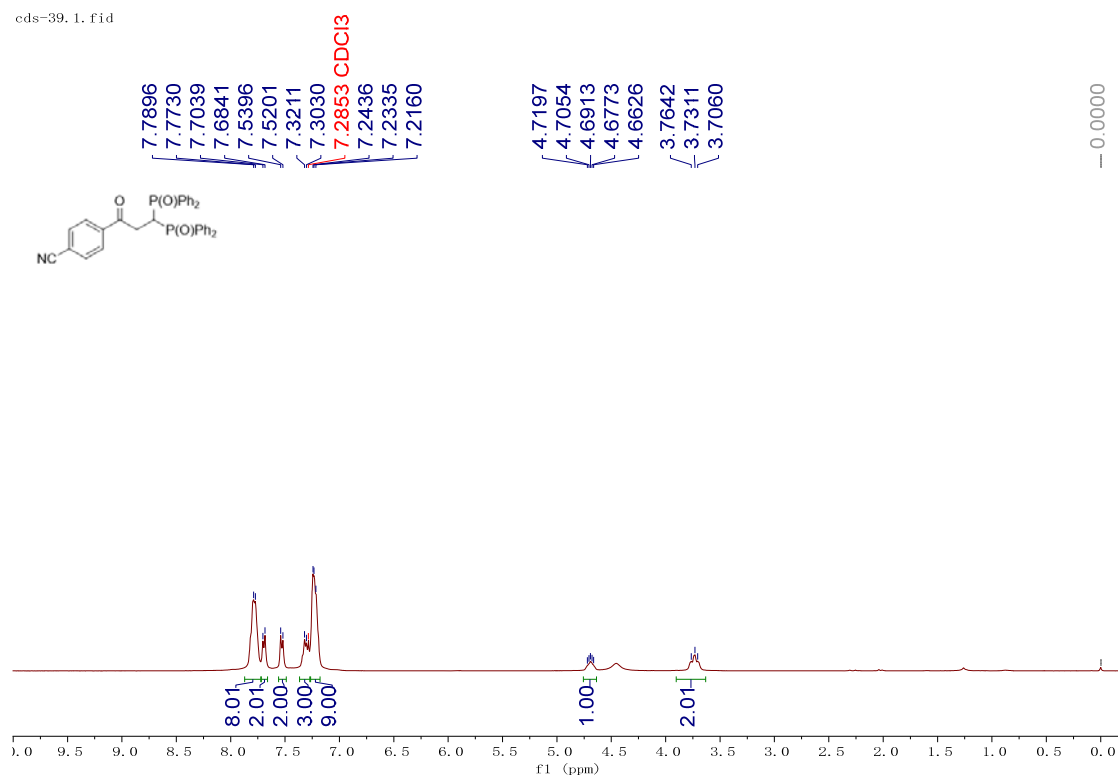

<sup>1</sup>H NMR spectrum of **3e** (400 MHz, CDCl<sub>3</sub>)

csd-39-c.1.fid

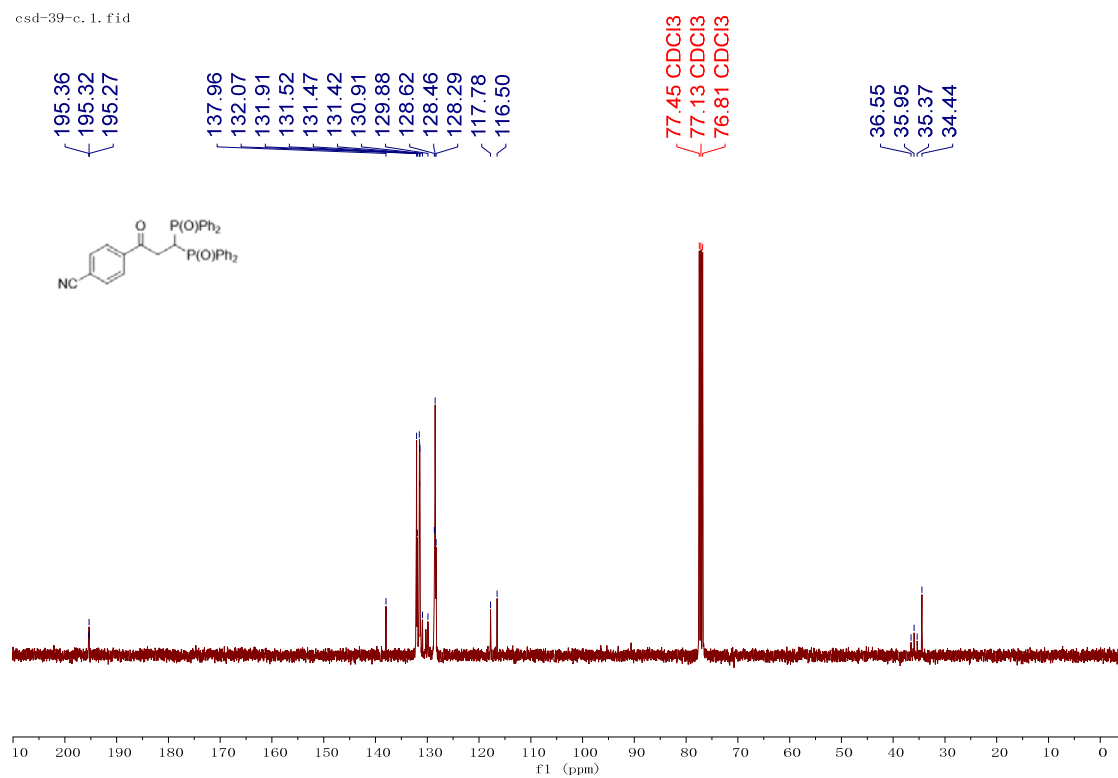

<sup>13</sup>C NMR spectrum of **3e** (100 MHz, CDCl<sub>3</sub>)



cds-39. 2. fid

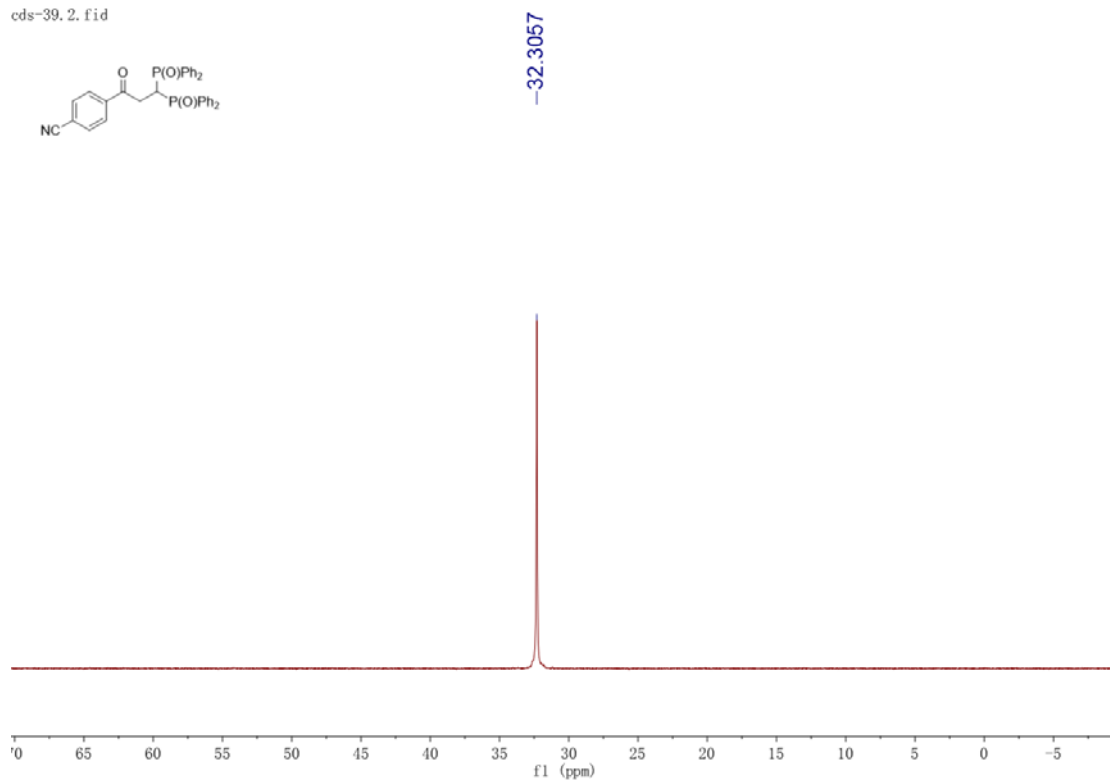

$^{31}\text{P}$  NMR spectrum of **3e** (162 MHz,  $\text{CDCl}_3$ )

cds-22. 1. fid

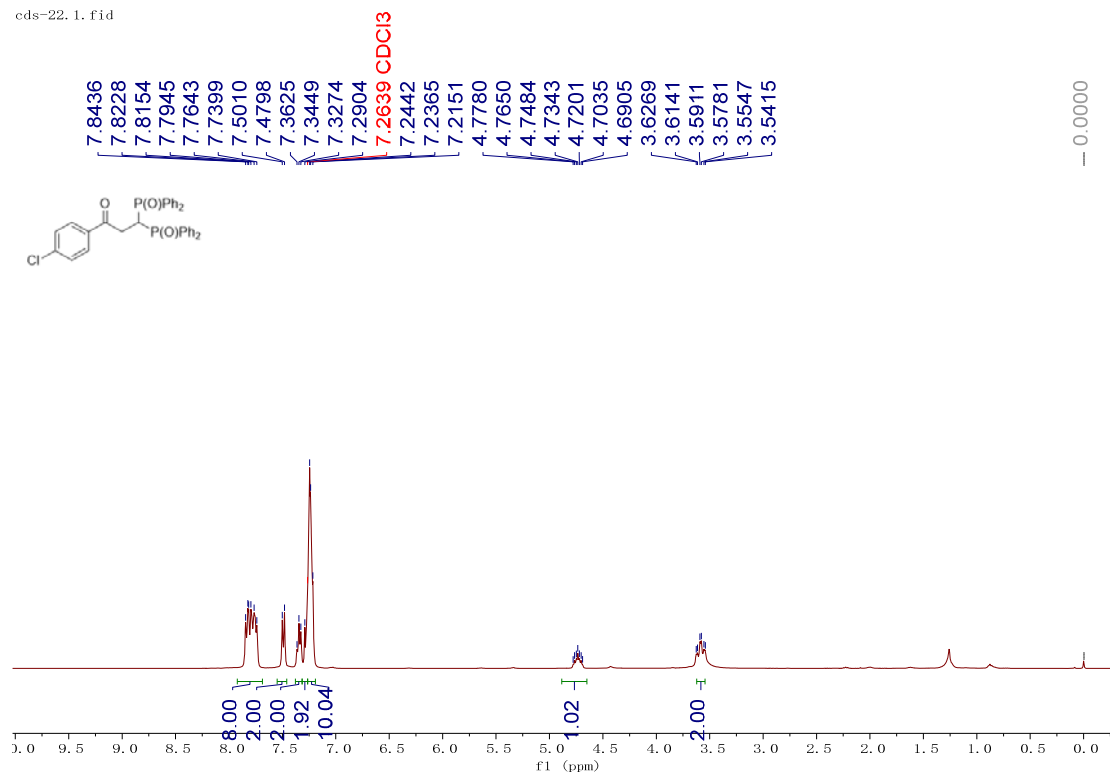

$^1\text{H}$  NMR spectrum of **3f** (400 MHz,  $\text{CDCl}_3$ )

cds-22-c. 1. fid

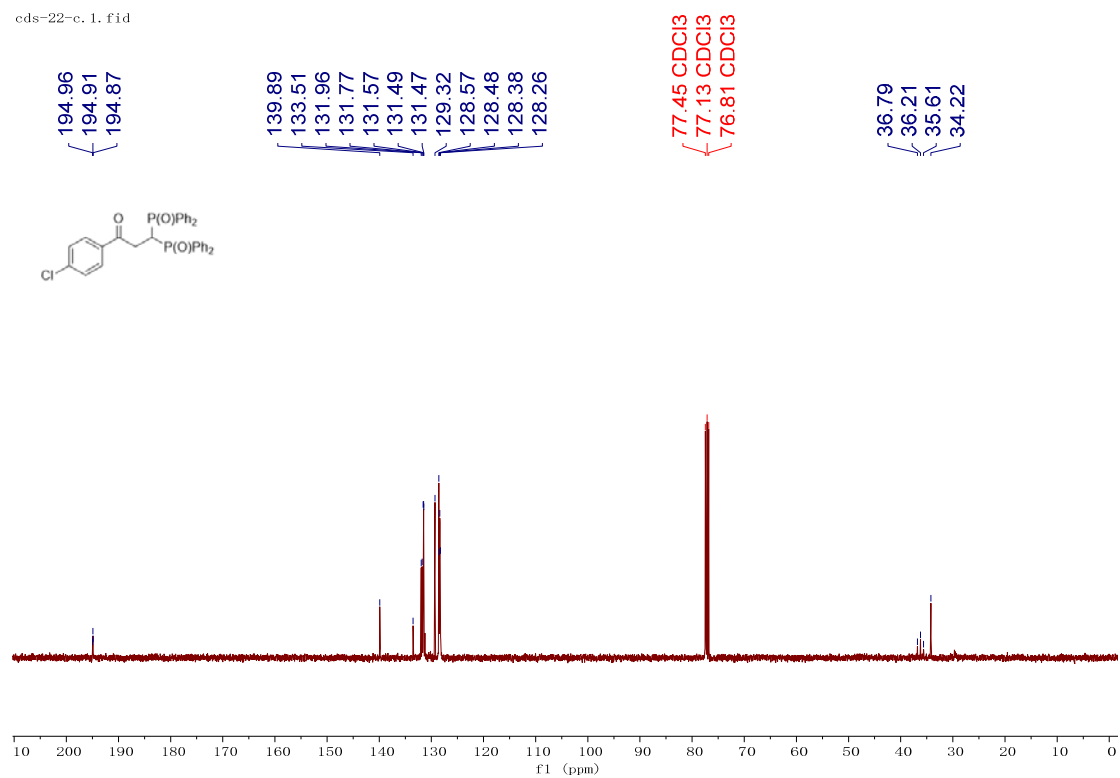

<sup>13</sup>C NMR spectrum of **3f** (100 MHz, CDCl<sub>3</sub>)

cds-22. 2. fid

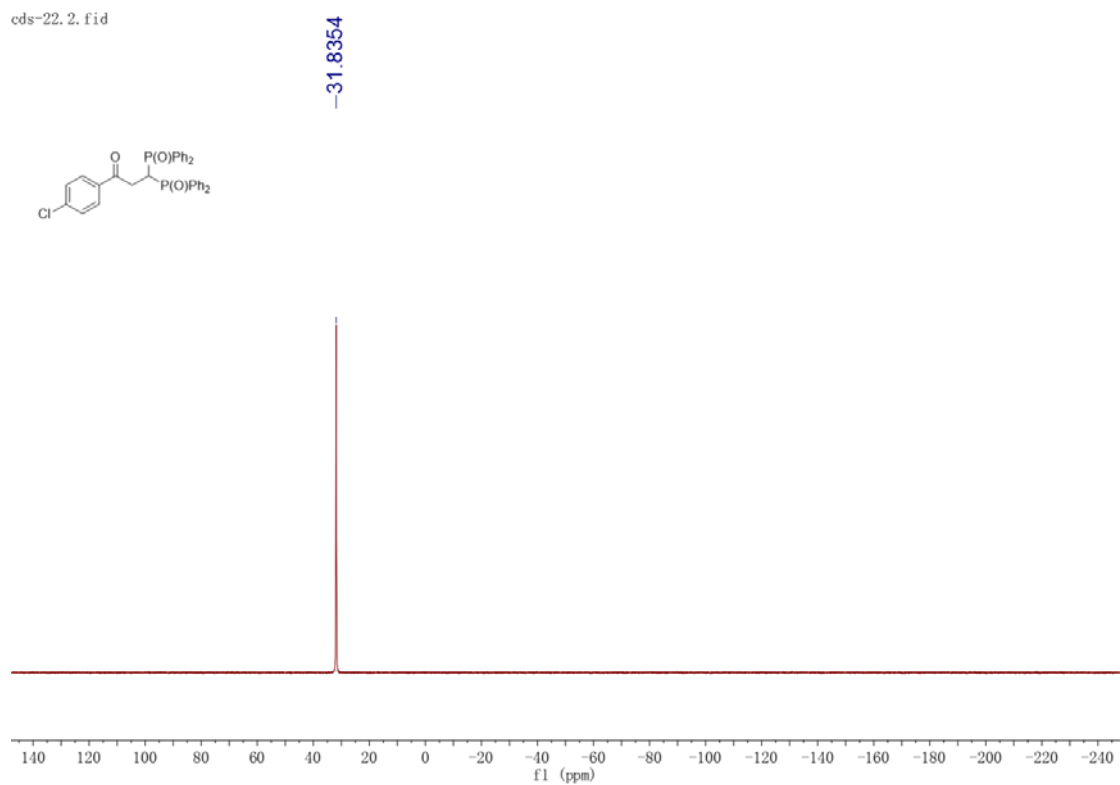

<sup>31</sup>P NMR spectrum of **3f** (162 MHz, CDCl<sub>3</sub>)

cds-18.1.fid

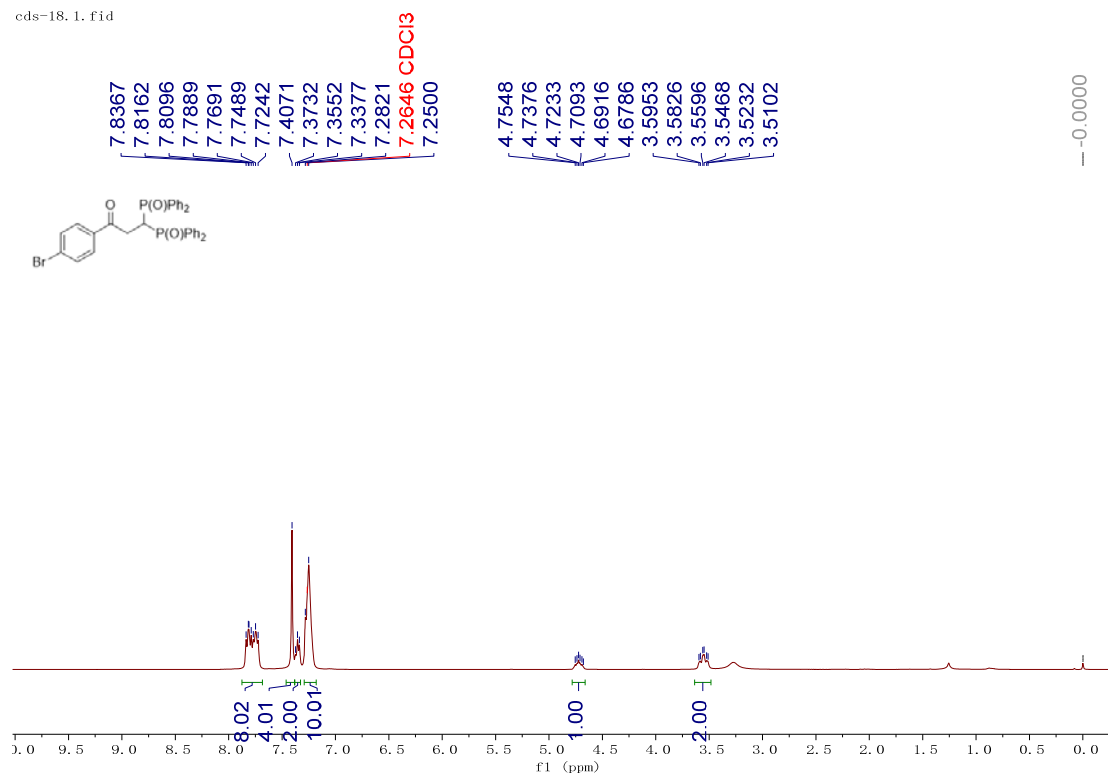

<sup>1</sup>H NMR spectrum of **3g** (400 MHz, CDCl<sub>3</sub>)

cds-18-c.10.fid

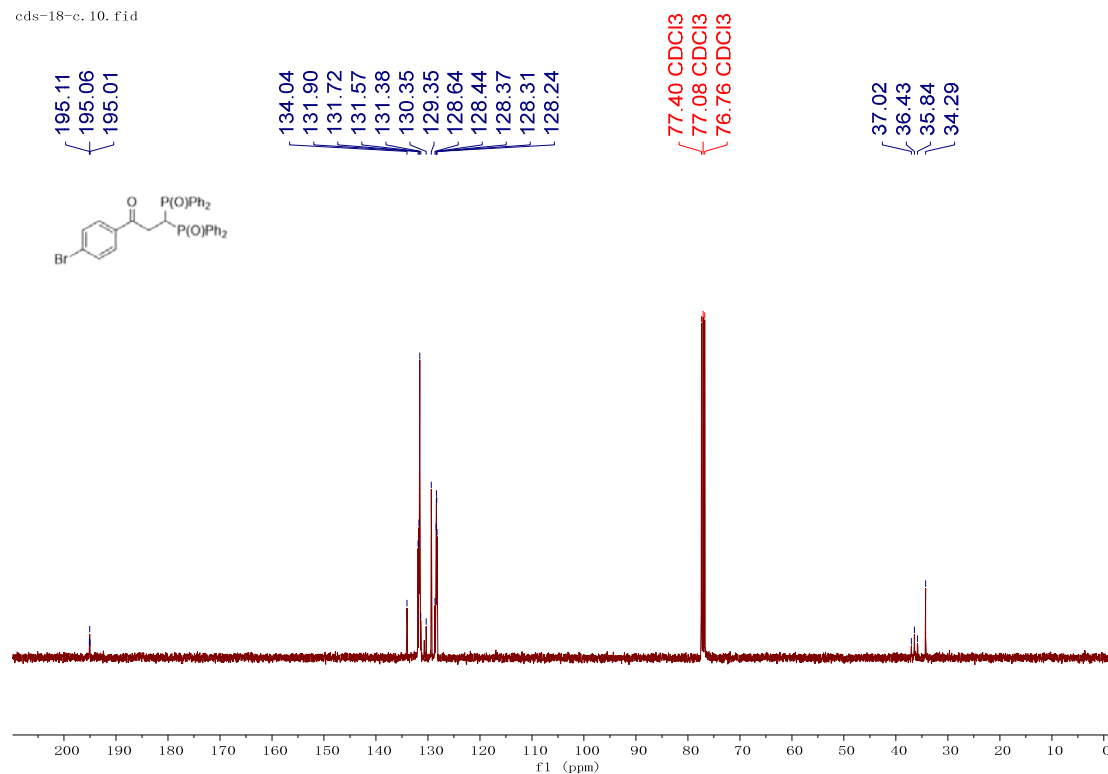

<sup>13</sup>C NMR spectrum of **3g** (100 MHz, CDCl<sub>3</sub>)

cds-18. 2. fid

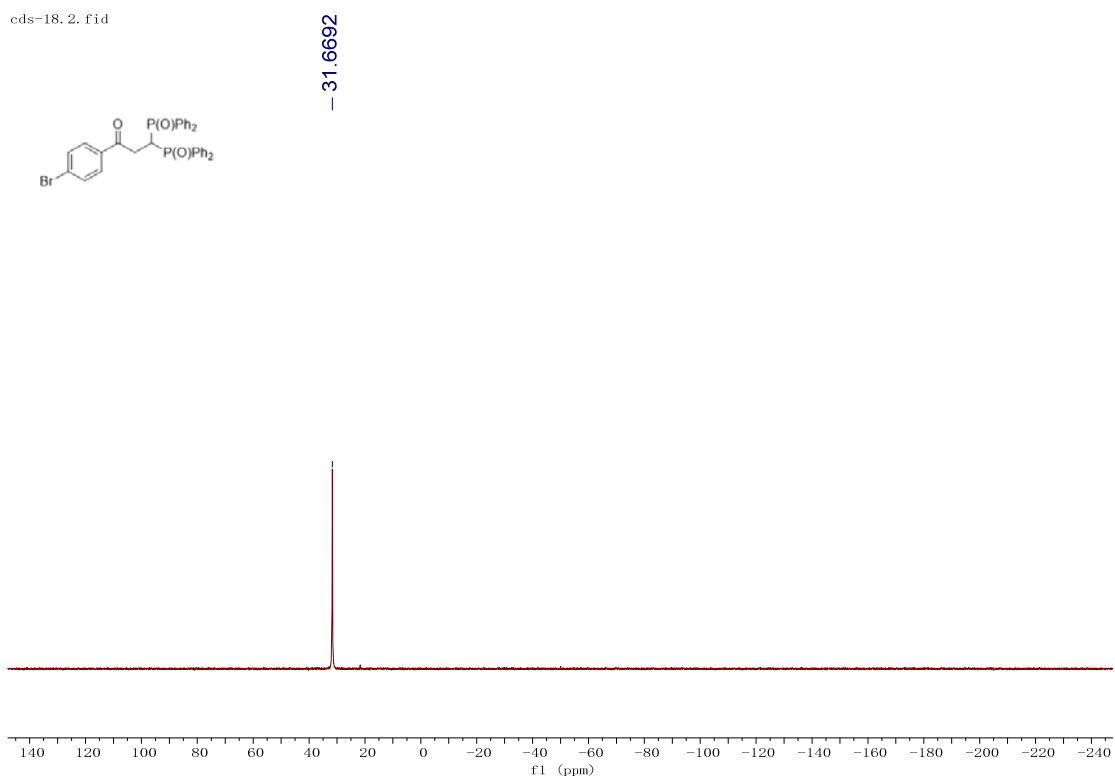

<sup>31</sup>P NMR spectrum of **3g** (162 MHz, CDCl<sub>3</sub>)

cds-23. 1. fid

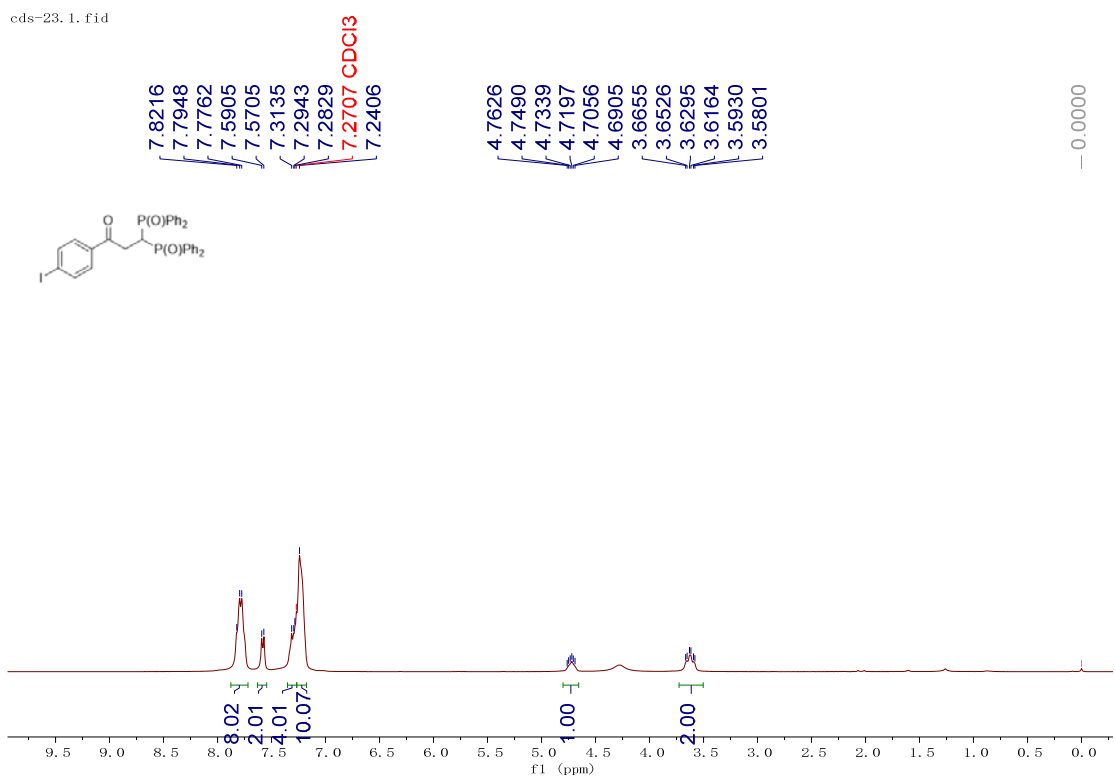

<sup>1</sup>H NMR spectrum of **3h** (400 MHz, CDCl<sub>3</sub>)

cds-23-c. 1. fid

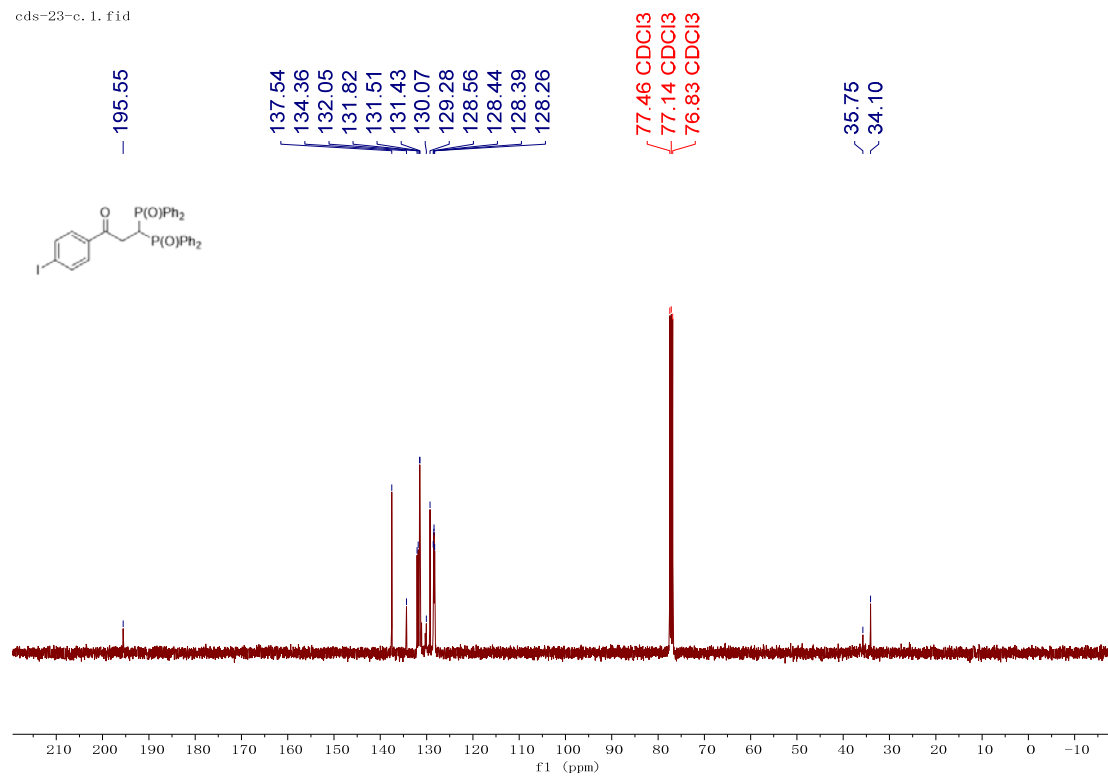

$^{13}\text{C}$  NMR spectrum of **3h** (100 MHz,  $\text{CDCl}_3$ )

cds-23. 2. fid

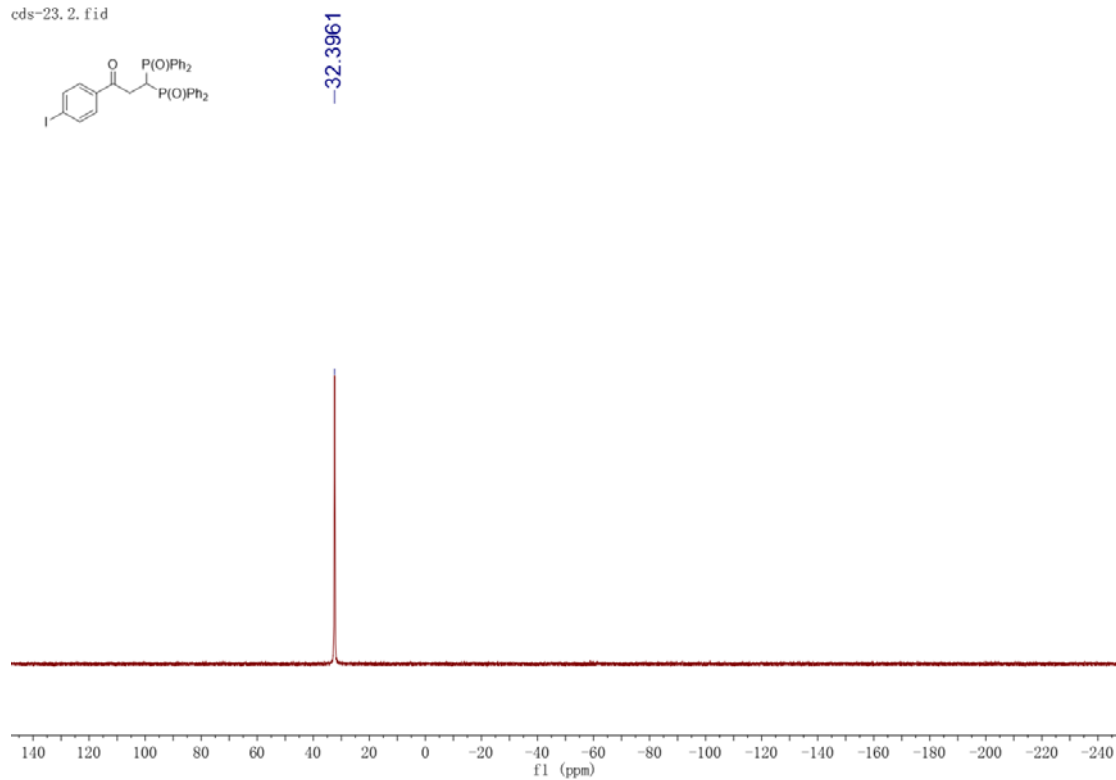

$^{31}\text{P}$  NMR spectrum of **3h** (162 MHz,  $\text{CDCl}_3$ )

cds-19-1.fid

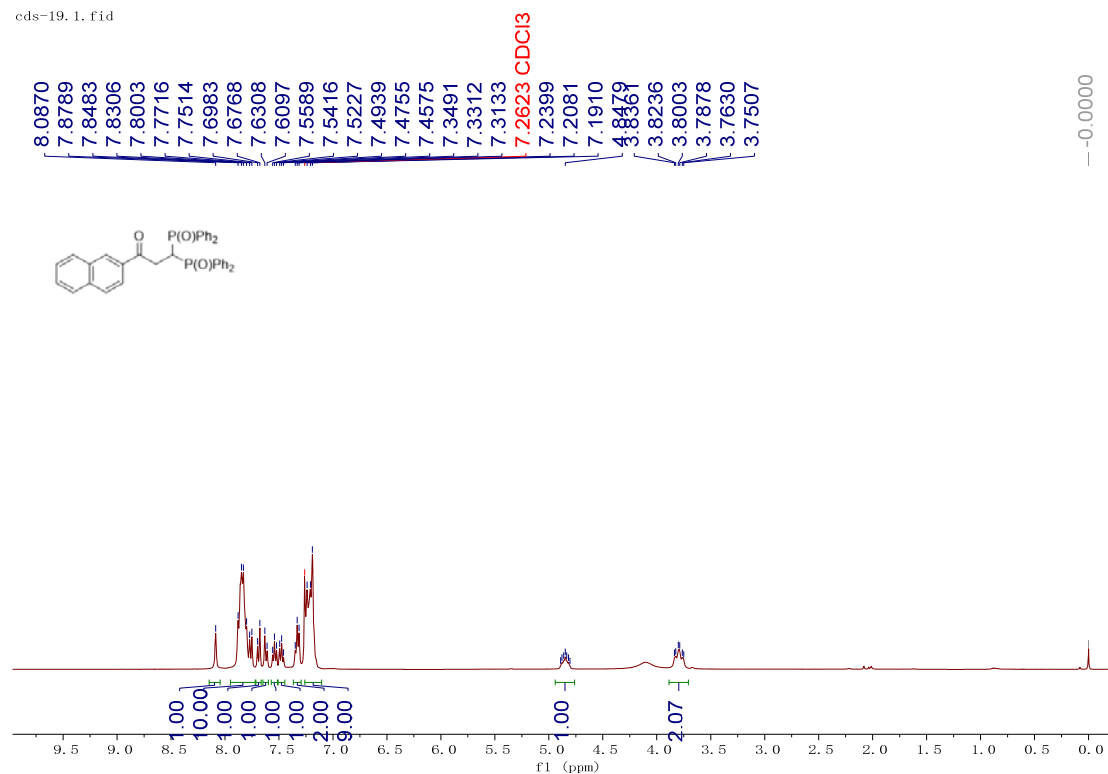

<sup>1</sup>H NMR spectrum of **3i** (400 MHz, CDCl<sub>3</sub>)

cds-19-c.1.fid

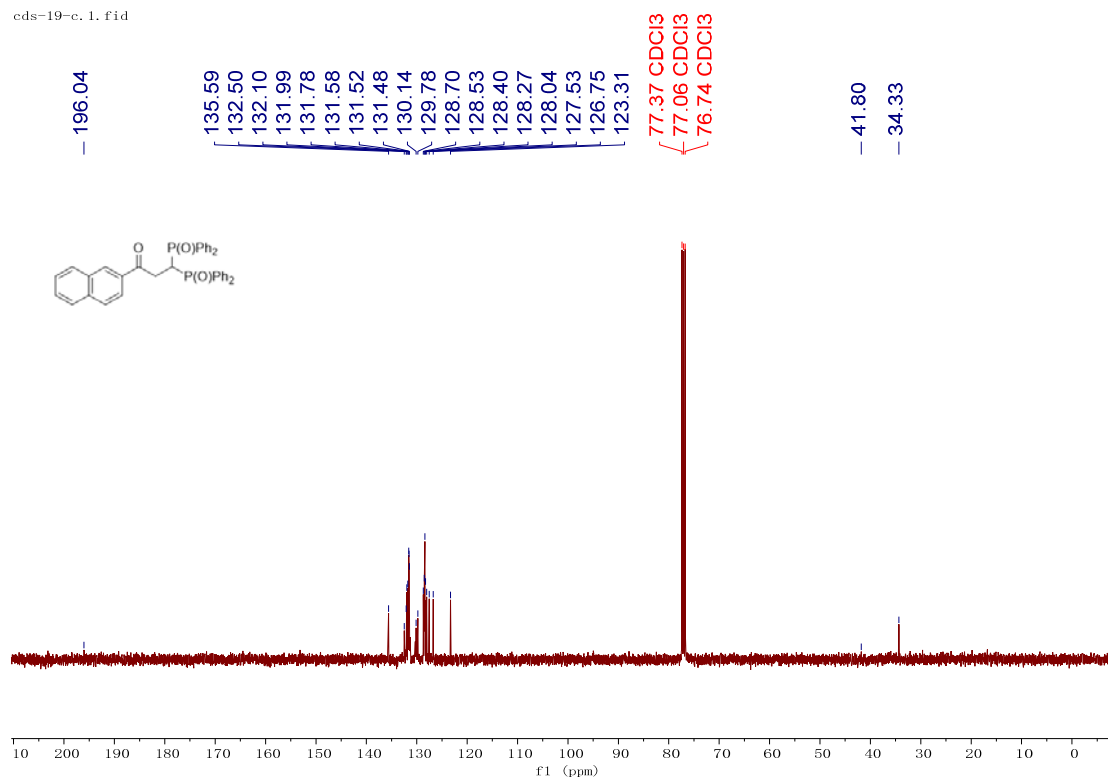

<sup>13</sup>C NMR spectrum of **3i** (100 MHz, CDCl<sub>3</sub>)

cds-19.2.fid

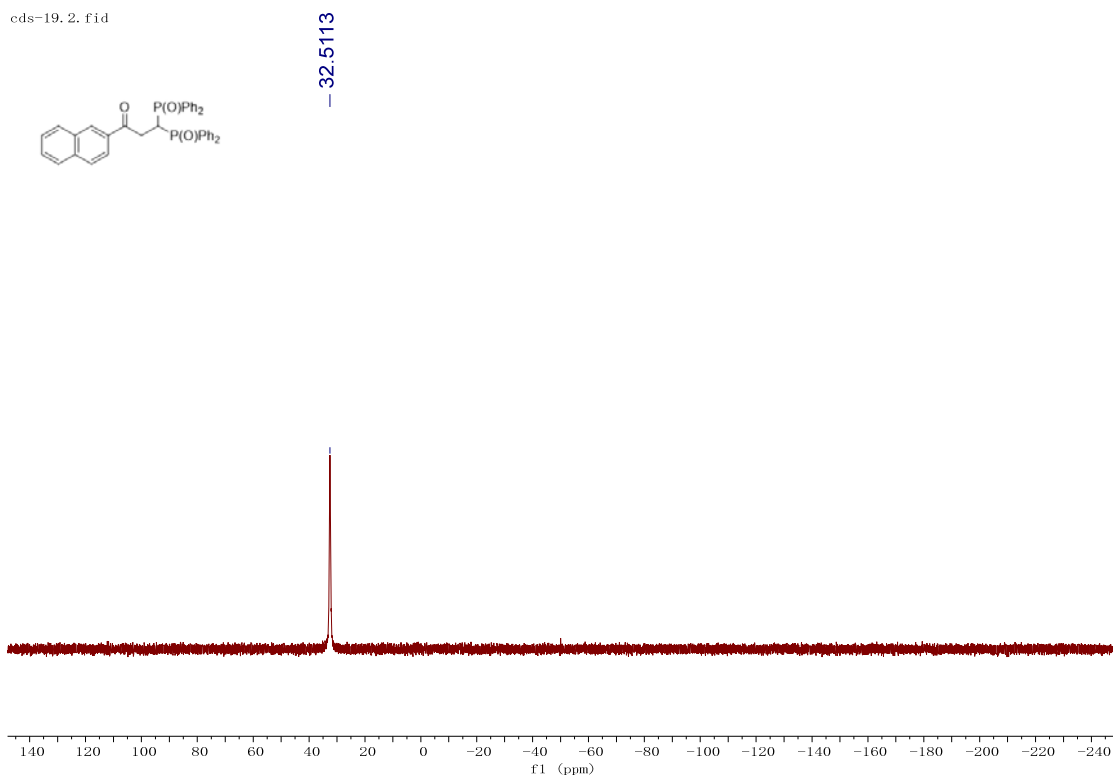

<sup>31</sup>P NMR spectrum of **3i** (162 MHz, CDCl<sub>3</sub>)

cds-28.1.fid

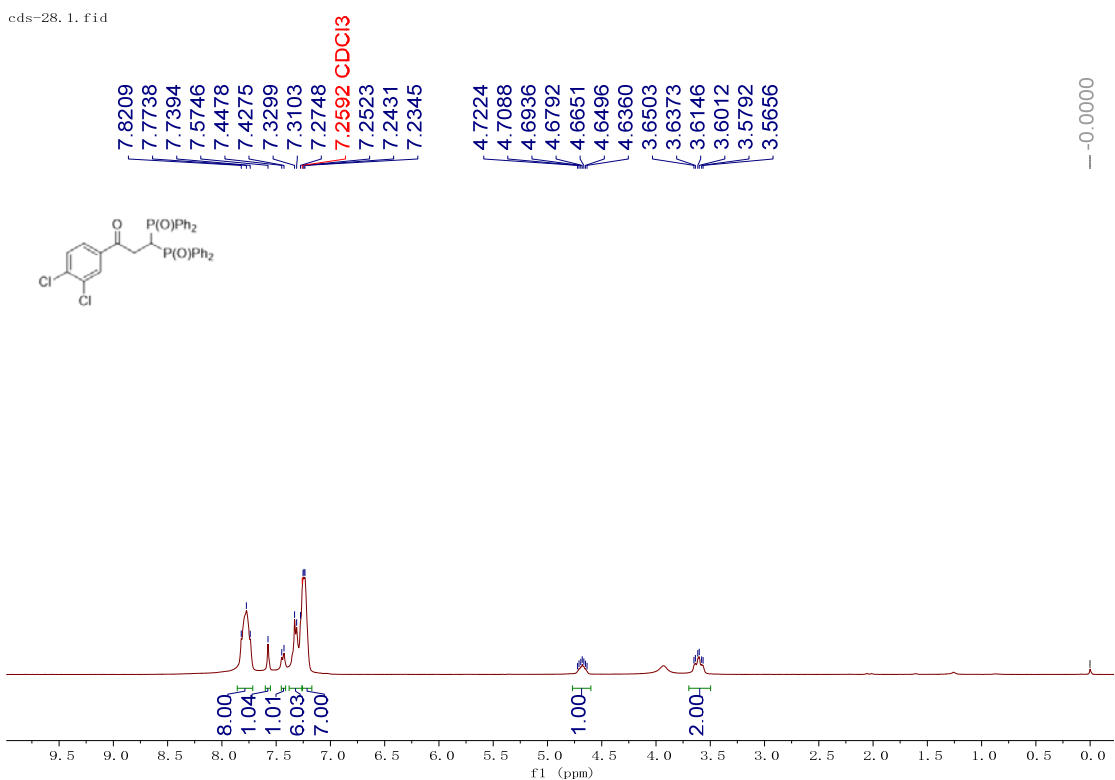

<sup>1</sup>H NMR spectrum of **3j** (400 MHz, CDCl<sub>3</sub>)

cds-28-1.1.fid

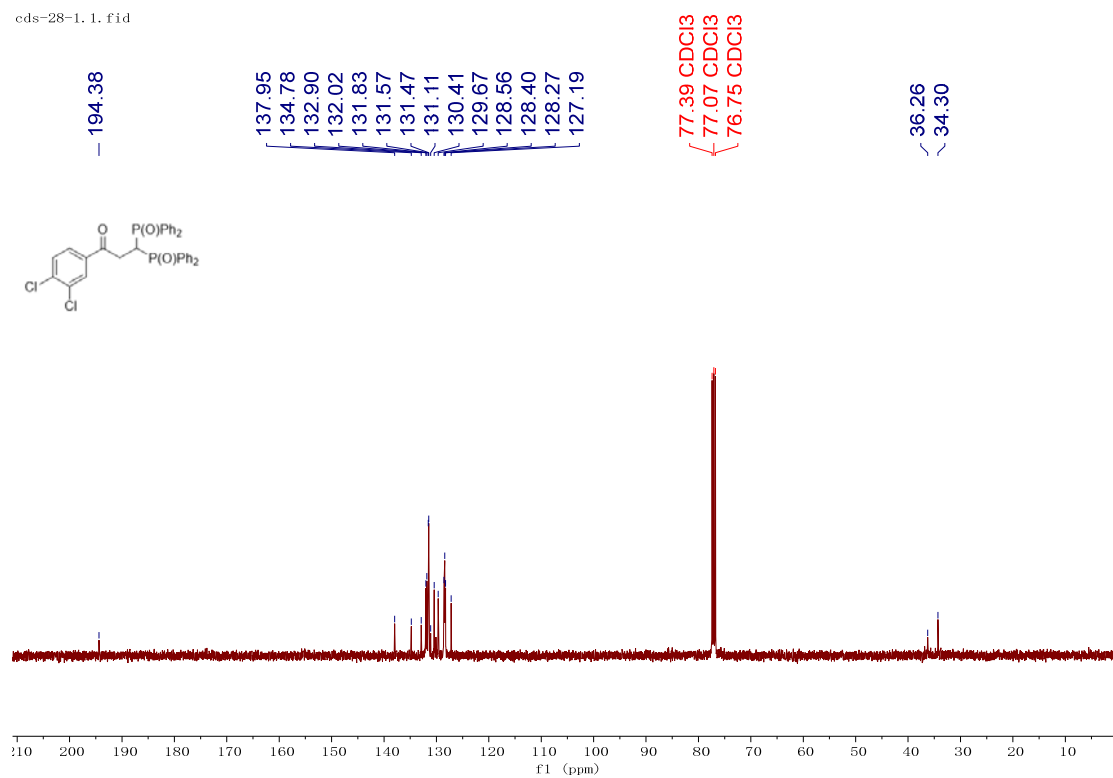

$^{13}\text{C}$  NMR spectrum of **3j** (100 MHz,  $\text{CDCl}_3$ )

cds-28.2.fid

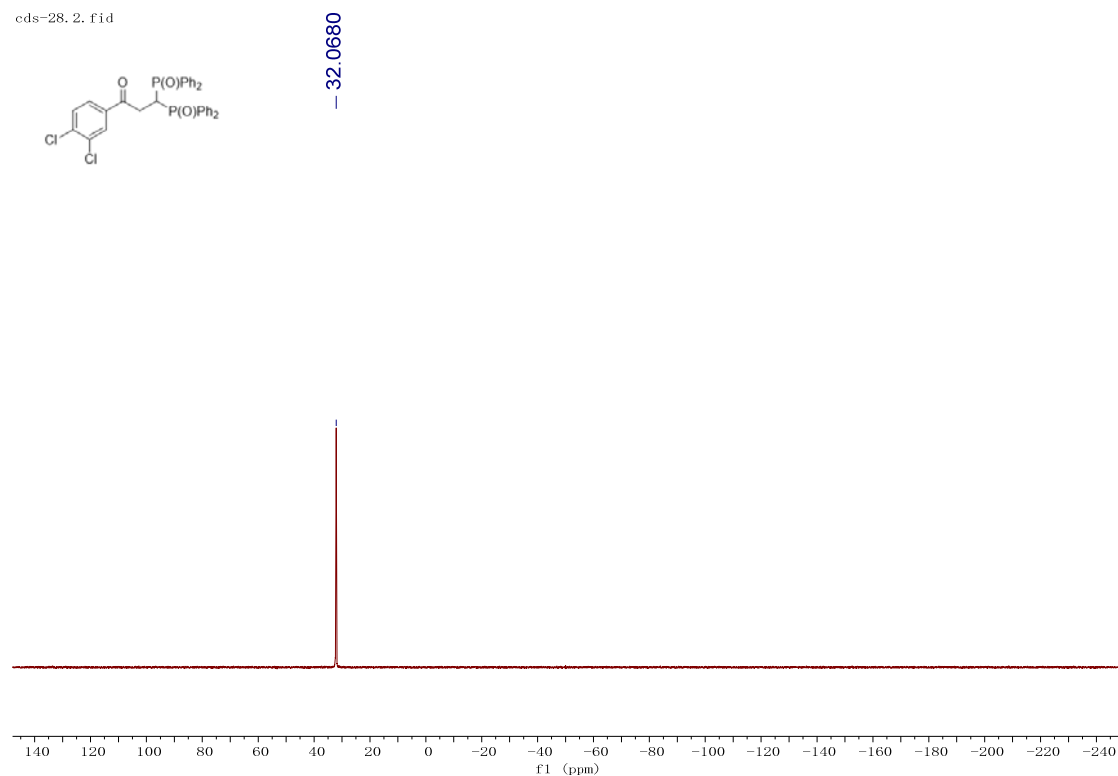

$^{31}\text{P}$  NMR spectrum of **3j** (162 MHz,  $\text{CDCl}_3$ )



cds-29.1.fid

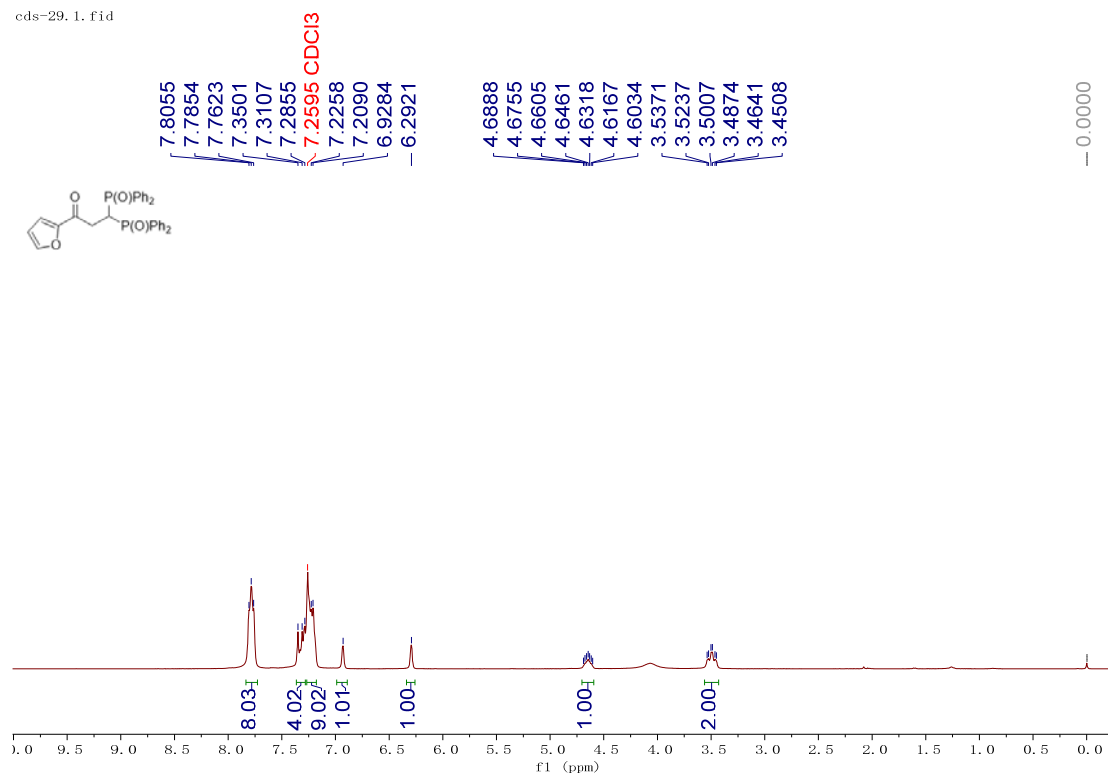

<sup>1</sup>H NMR spectrum of **3k** (400 MHz, CDCl<sub>3</sub>)

cds-29-1.1.fid

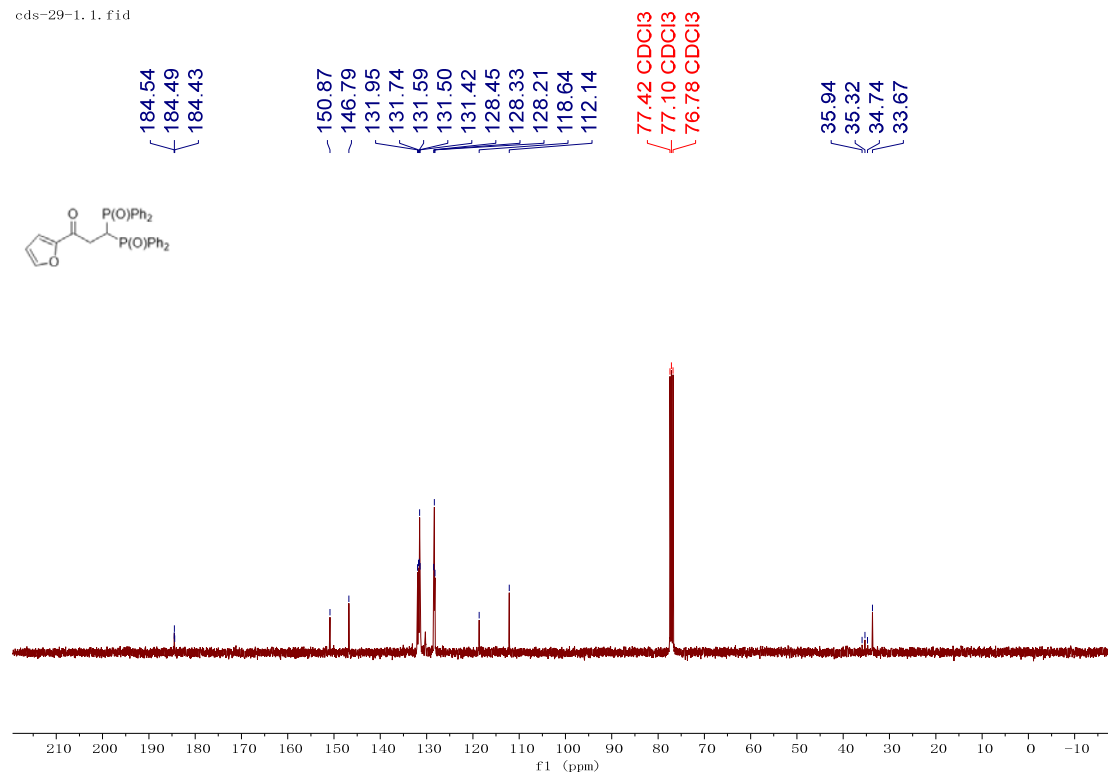

<sup>13</sup>C NMR spectrum of **3k** (100 MHz, CDCl<sub>3</sub>)

cds-29.2.fid

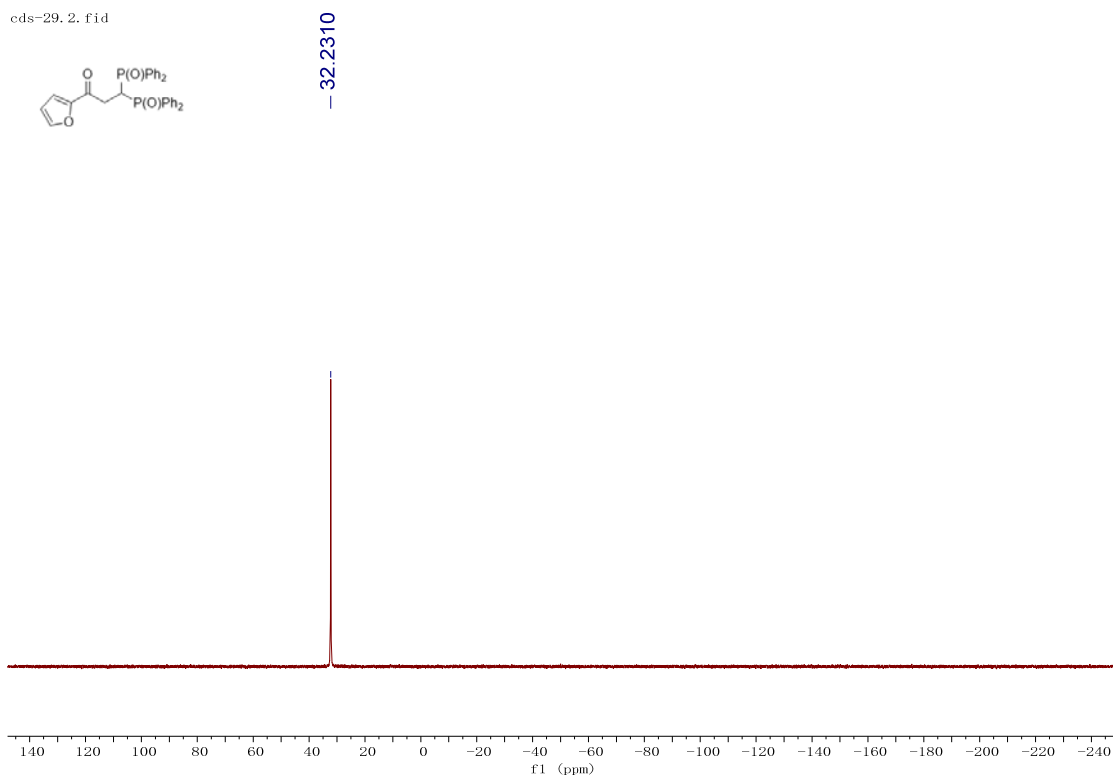

$^{31}\text{P}$  NMR spectrum of **3k** (162 MHz,  $\text{CDCl}_3$ )

cds-30-1.1.fid

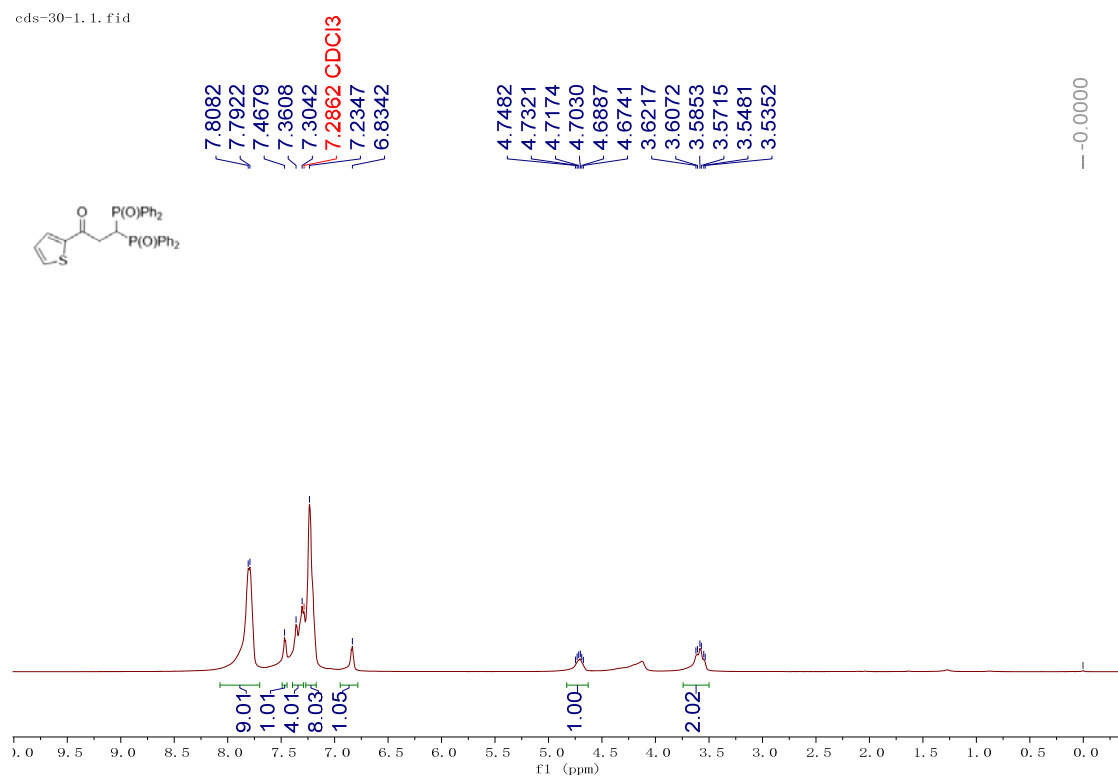

$^1\text{H}$  NMR spectrum of **3l** (400 MHz,  $\text{CDCl}_3$ )

cds-30-1.2.fid

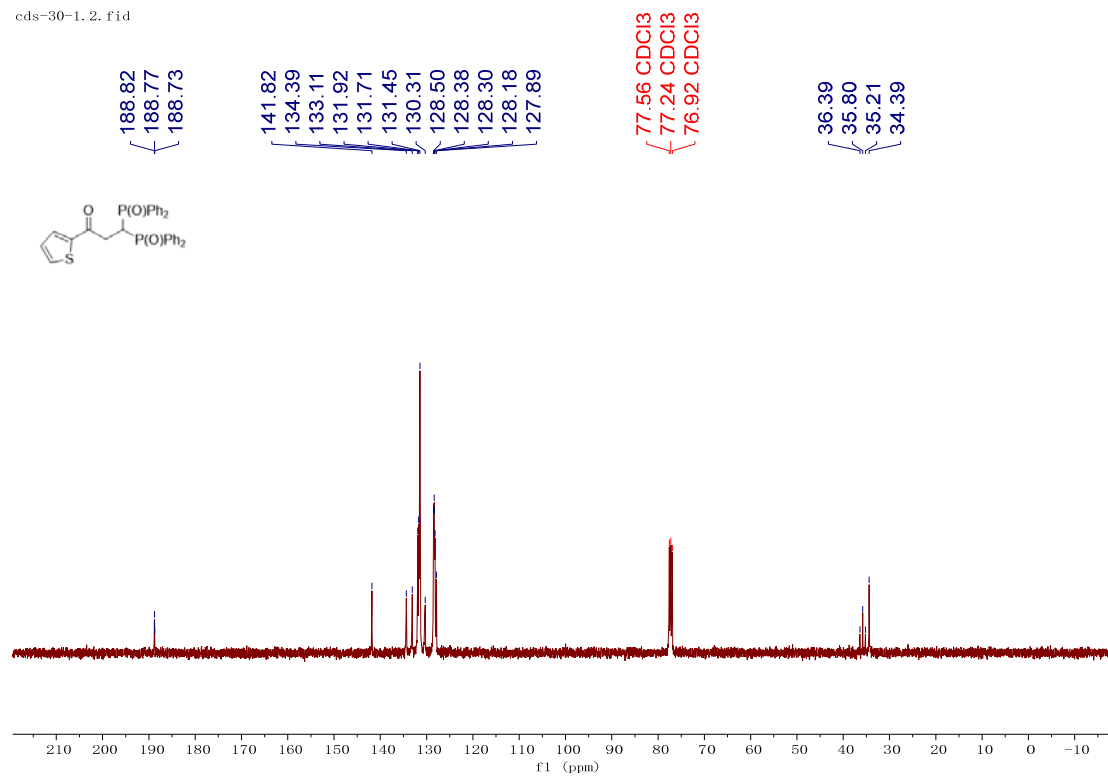

<sup>13</sup>C NMR spectrum of **31** (100 MHz, CDCl<sub>3</sub>)

cds-30.1.fid

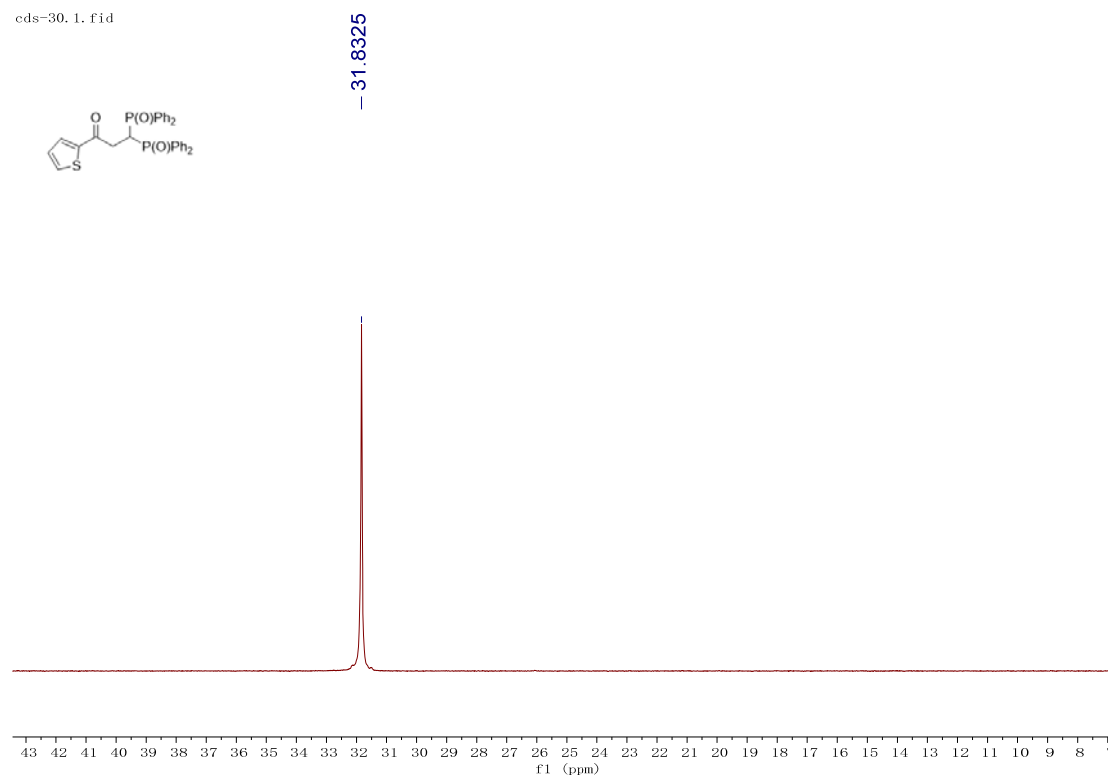

<sup>31</sup>P NMR spectrum of **31** (162 MHz, CDCl<sub>3</sub>)

cds-69.1.1.fid

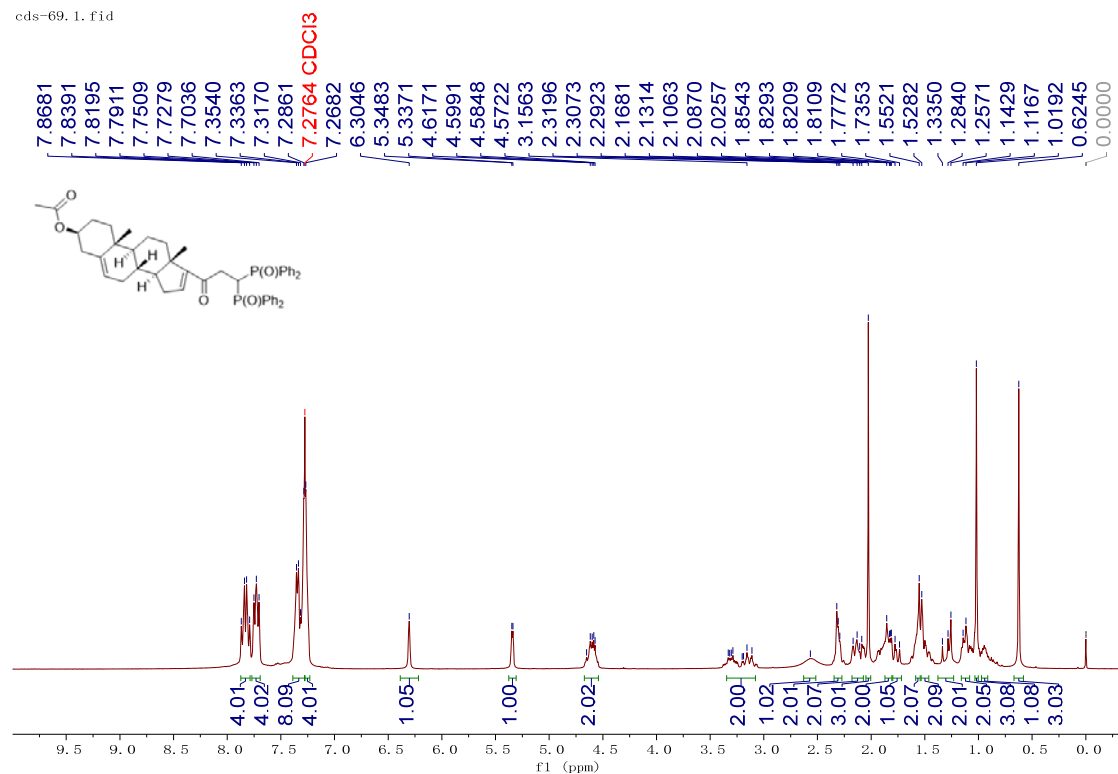

<sup>1</sup>H NMR spectrum of **3m** (400 MHz, CDCl<sub>3</sub>)

cds-69-c.1.fid

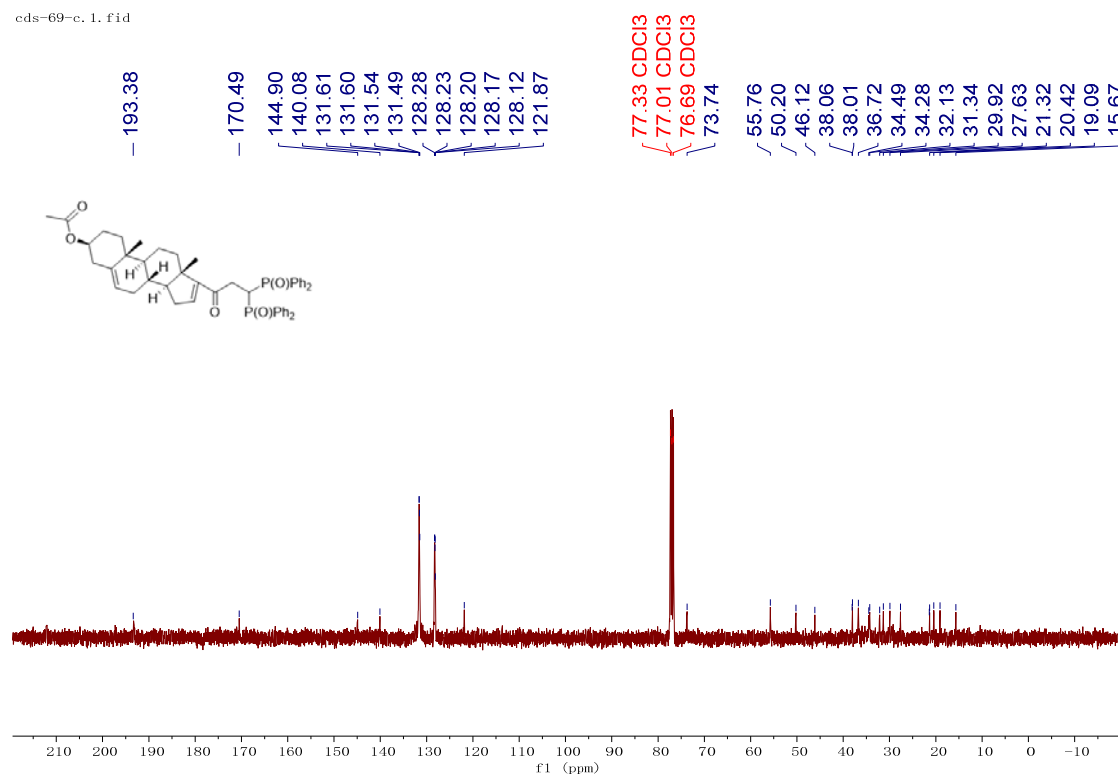

<sup>13</sup>C NMR spectrum of **3m** (100 MHz, CDCl<sub>3</sub>)

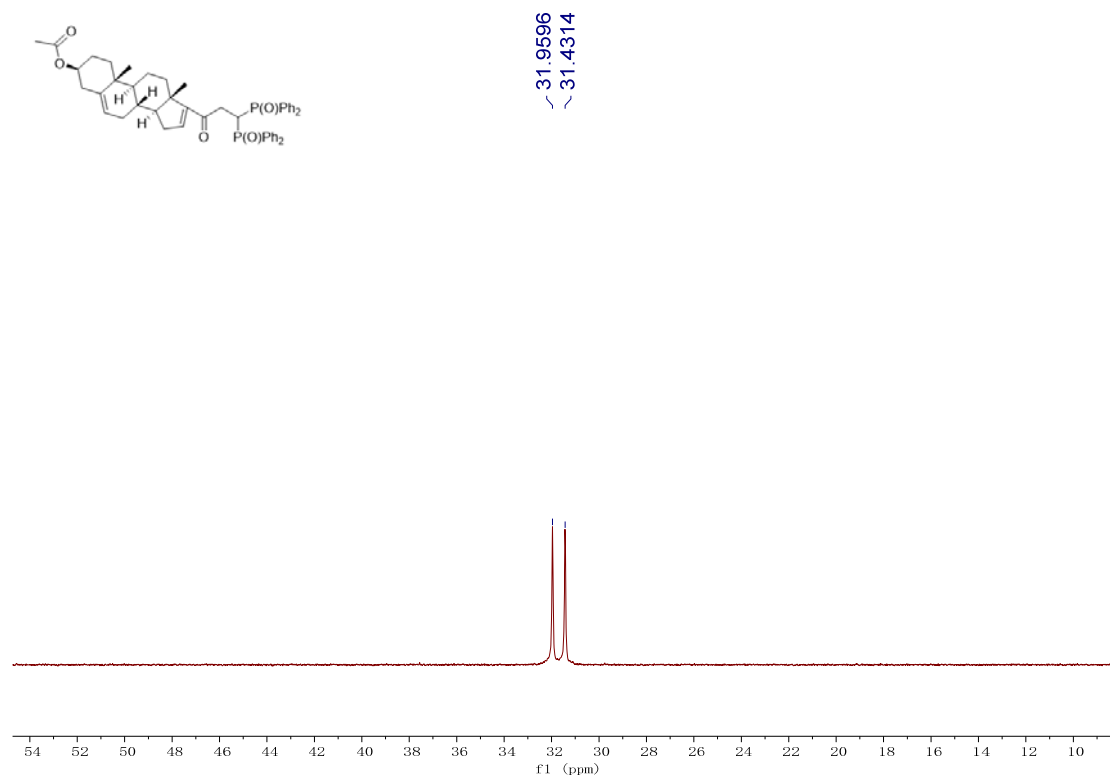

$^{31}\text{P}$  NMR spectrum of **3m** (162 MHz,  $\text{CDCl}_3$ )

cds-51.1.fid

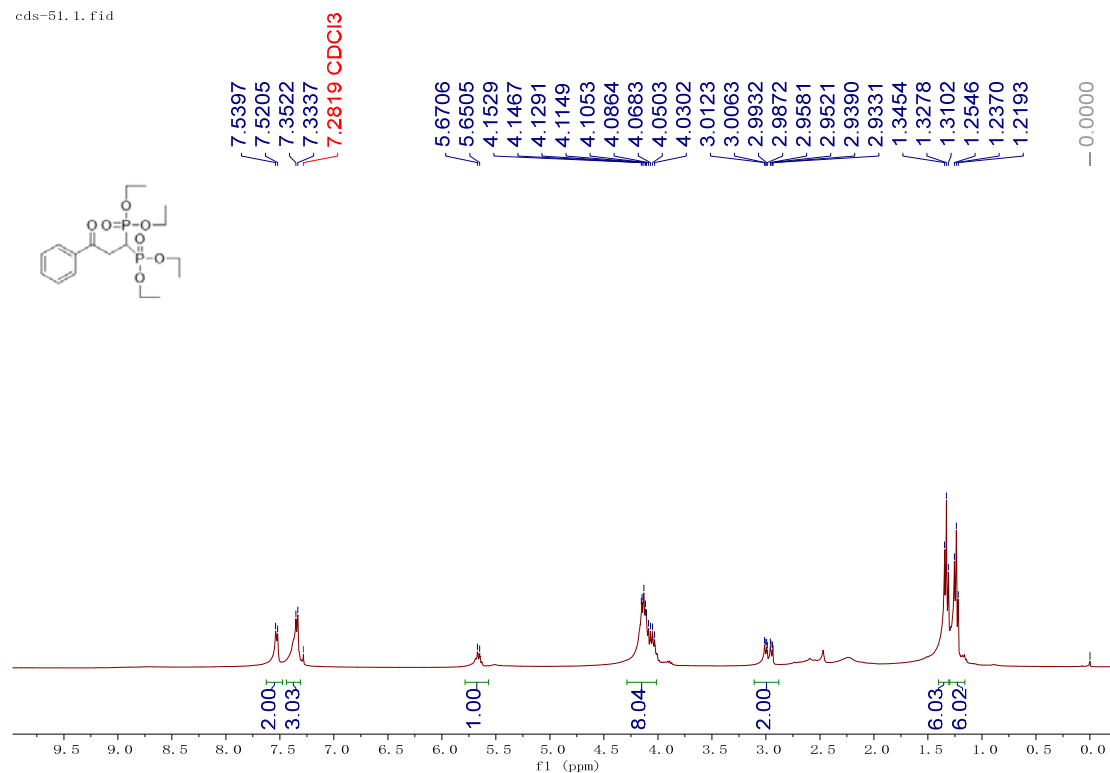

$^1\text{H}$  NMR spectrum of **3n** (400 MHz,  $\text{CDCl}_3$ )

cds-51-c. 1. fid

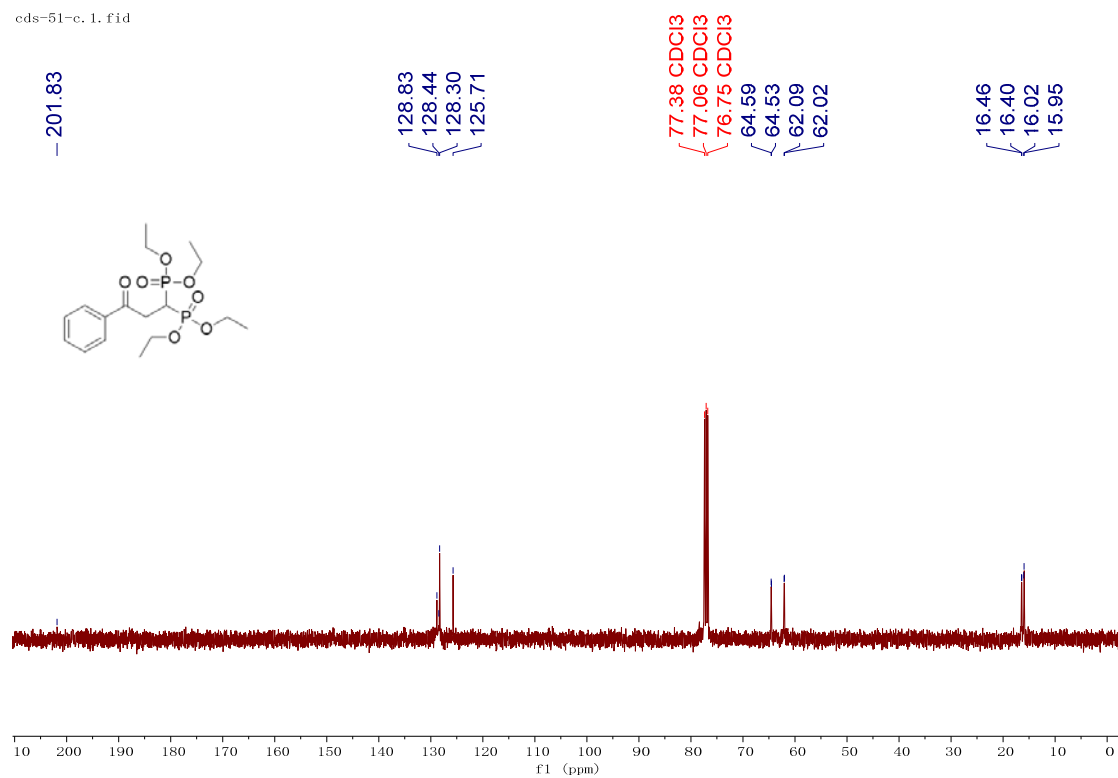

<sup>13</sup>C NMR spectrum of **3n** (100 MHz, CDCl<sub>3</sub>)

cds-51. 2. fid

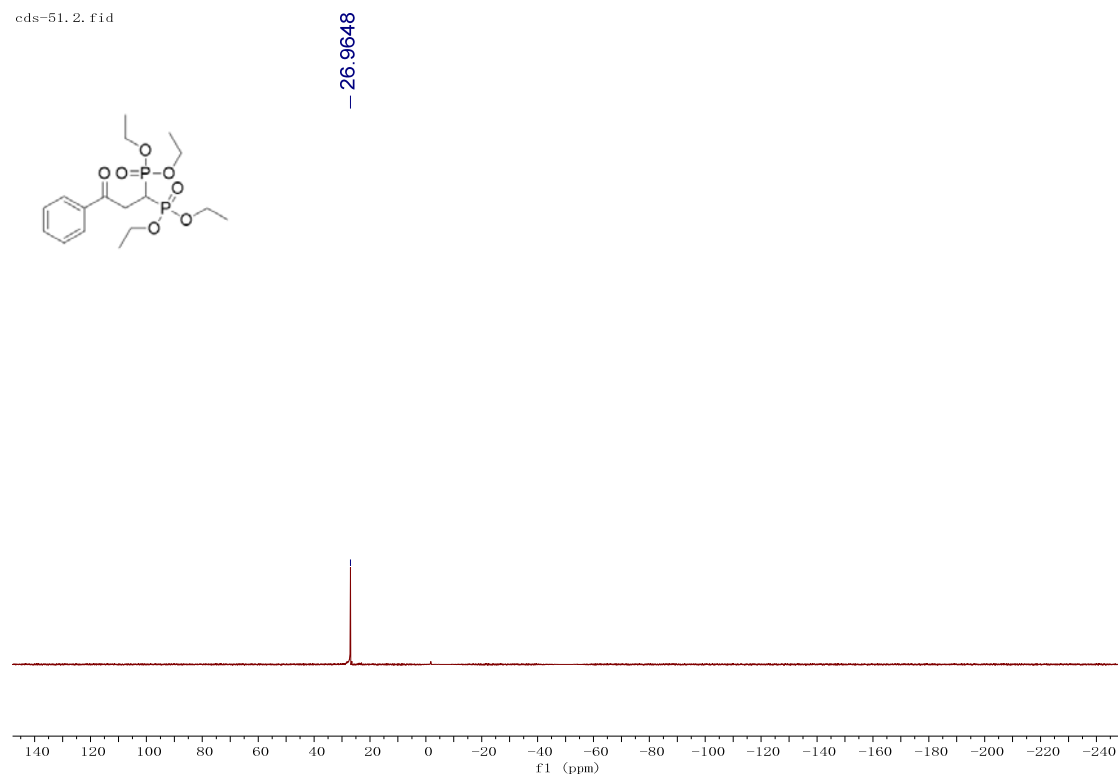

<sup>31</sup>P NMR spectrum of **3n** (162 MHz, CDCl<sub>3</sub>)

cds-31-1.1.fid

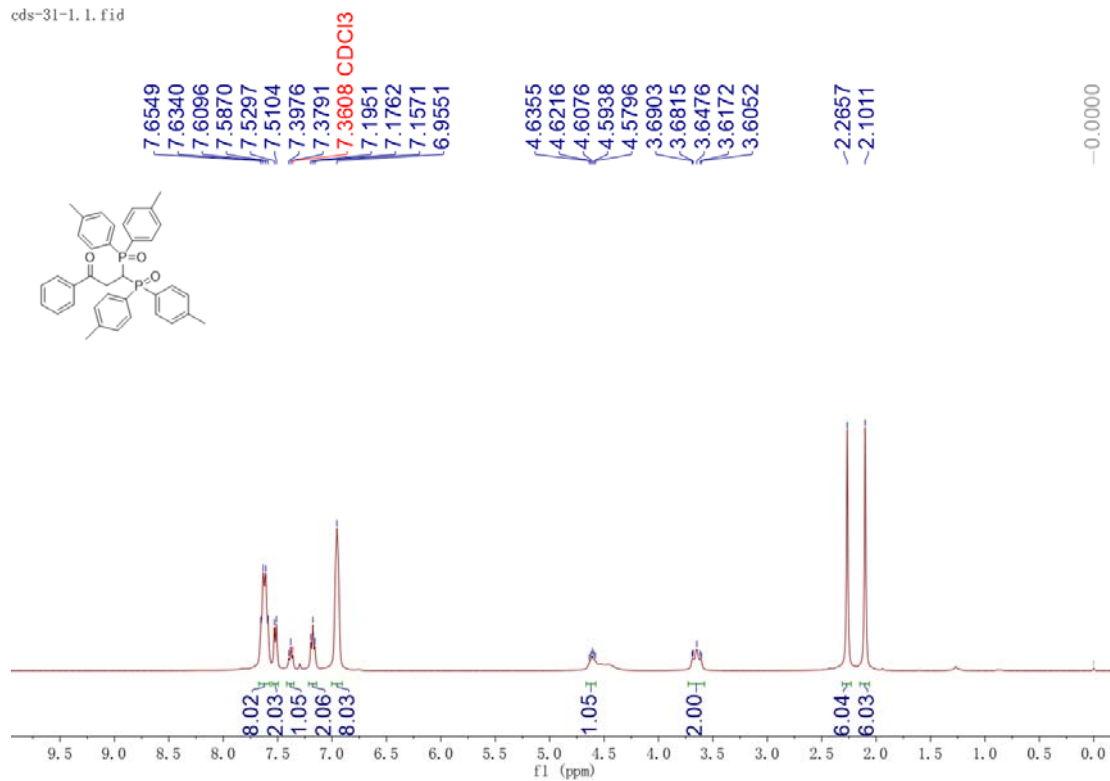

<sup>1</sup>H NMR spectrum of **3o** (400 MHz, CDCl<sub>3</sub>)

cds-31-1.2.fid

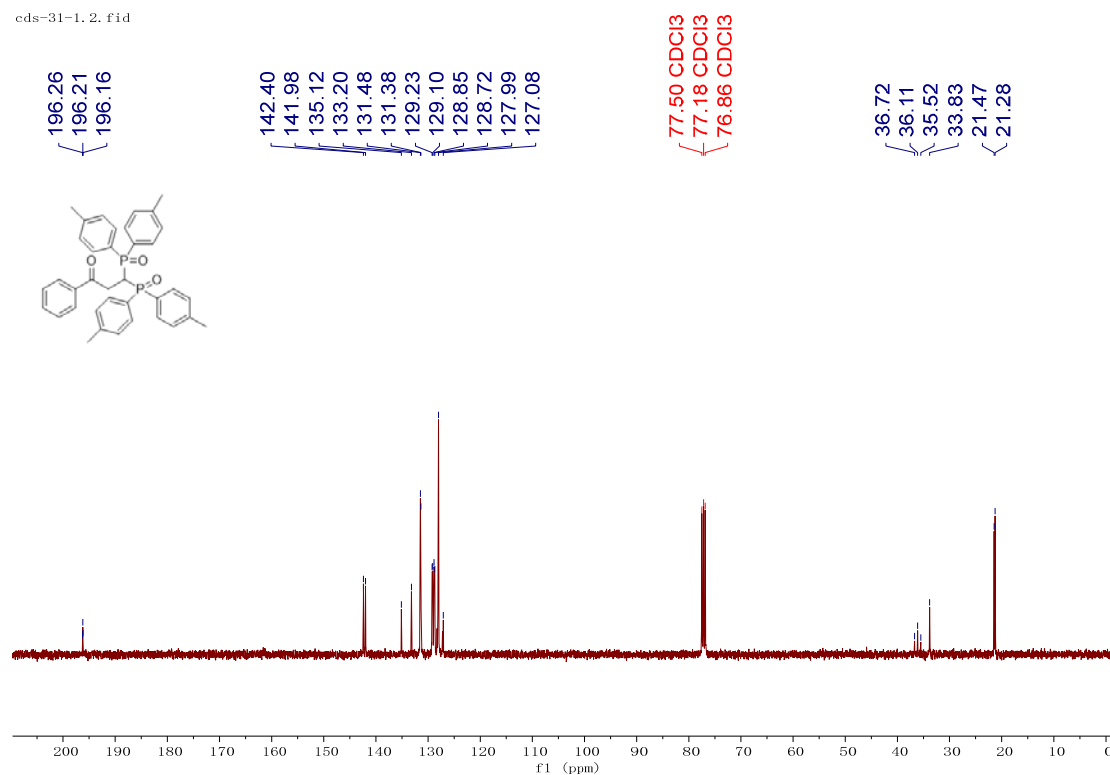

<sup>13</sup>C NMR spectrum of **3o** (100 MHz, CDCl<sub>3</sub>)

cds-31.2.fid

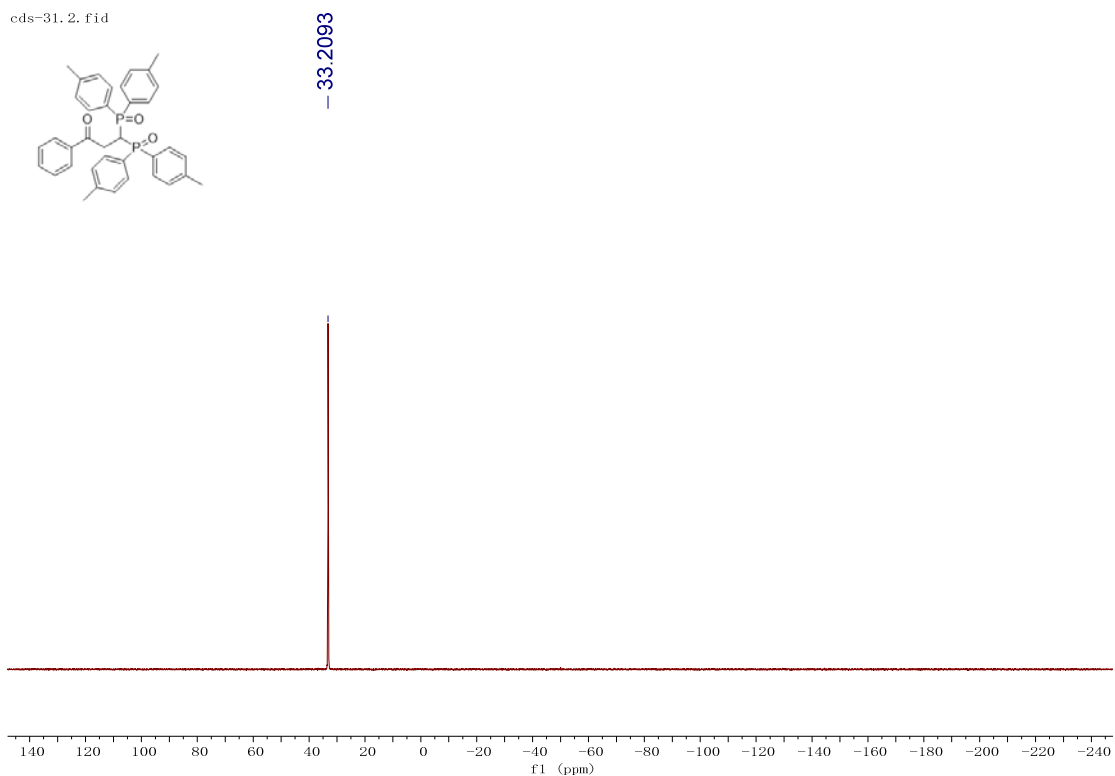

<sup>31</sup>P NMR spectrum of **3o** (162 MHz, CDCl<sub>3</sub>)

cds-32-1.1.fid

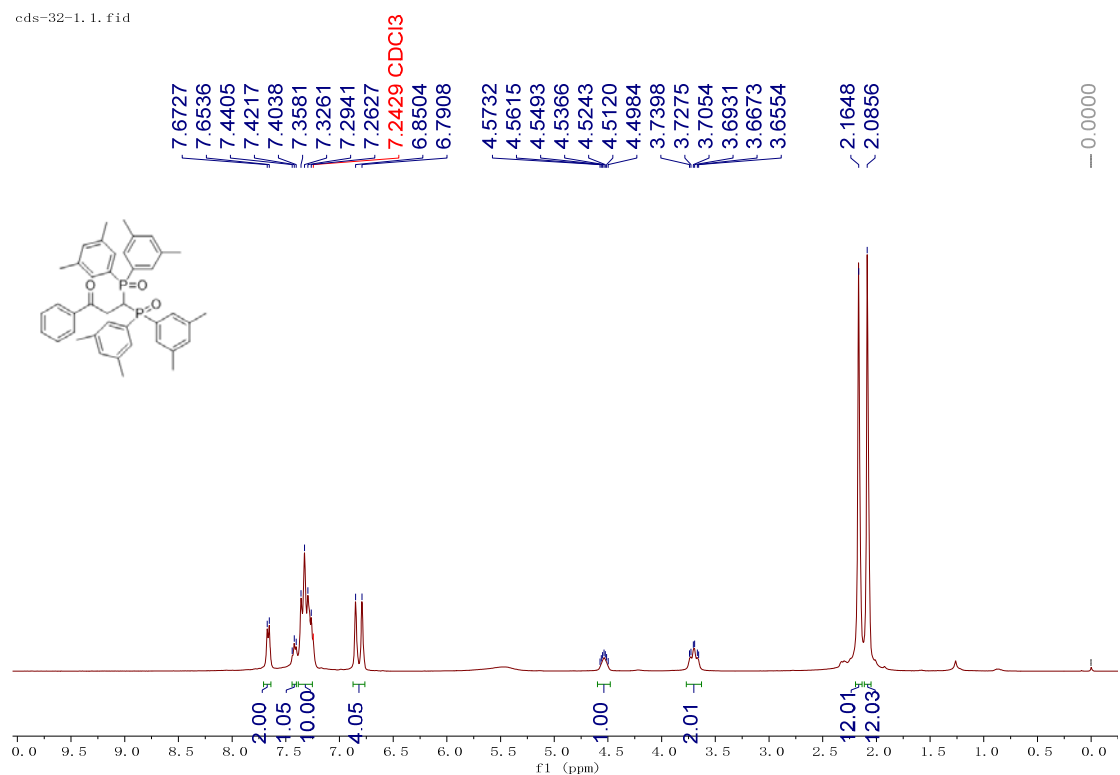

<sup>1</sup>H NMR spectrum of **3p** (400 MHz, CDCl<sub>3</sub>)



cds-32-1.2.fid

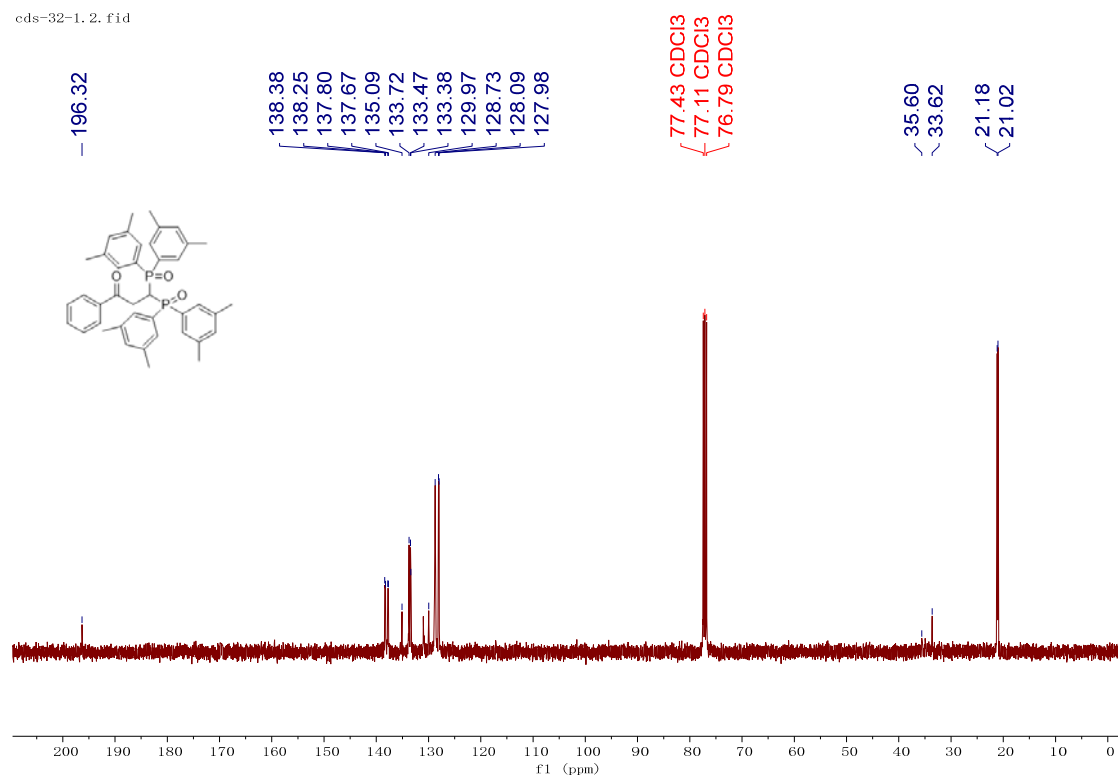

$^{13}\text{C}$  NMR spectrum of **3p** (100 MHz,  $\text{CDCl}_3$ )

cds-32.2.fid

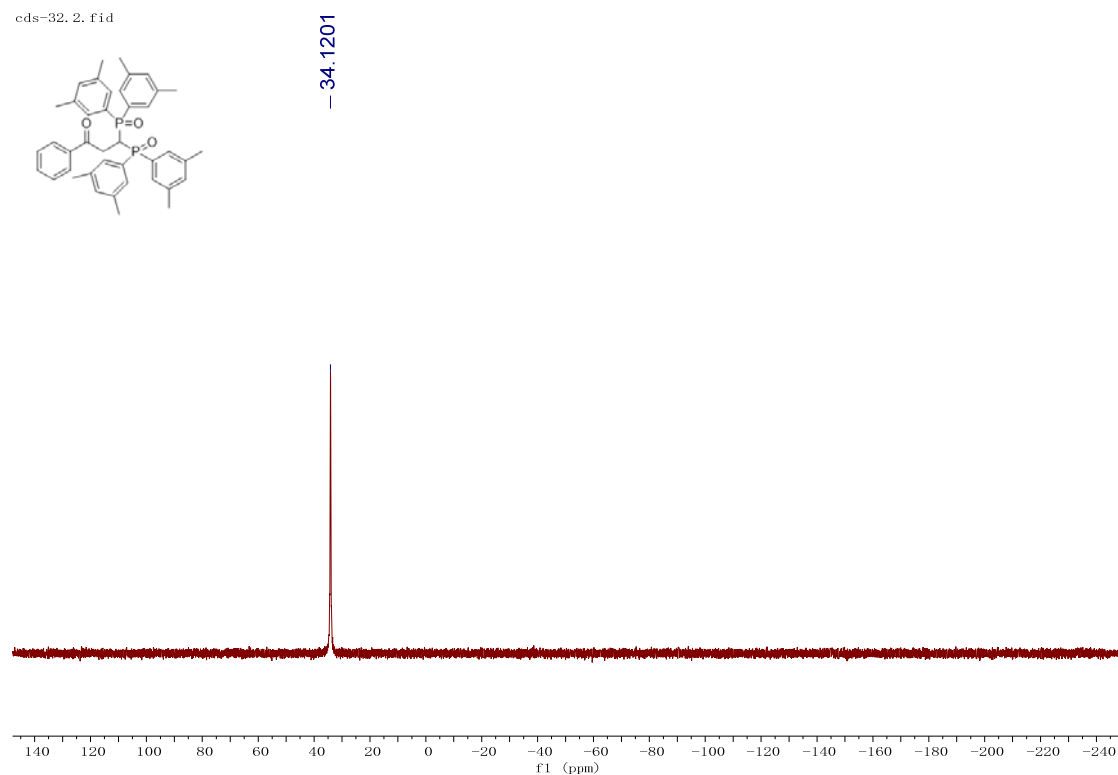

$^{31}\text{P}$  NMR spectrum of **3p** (162 MHz,  $\text{CDCl}_3$ )

cds-34.1.fid

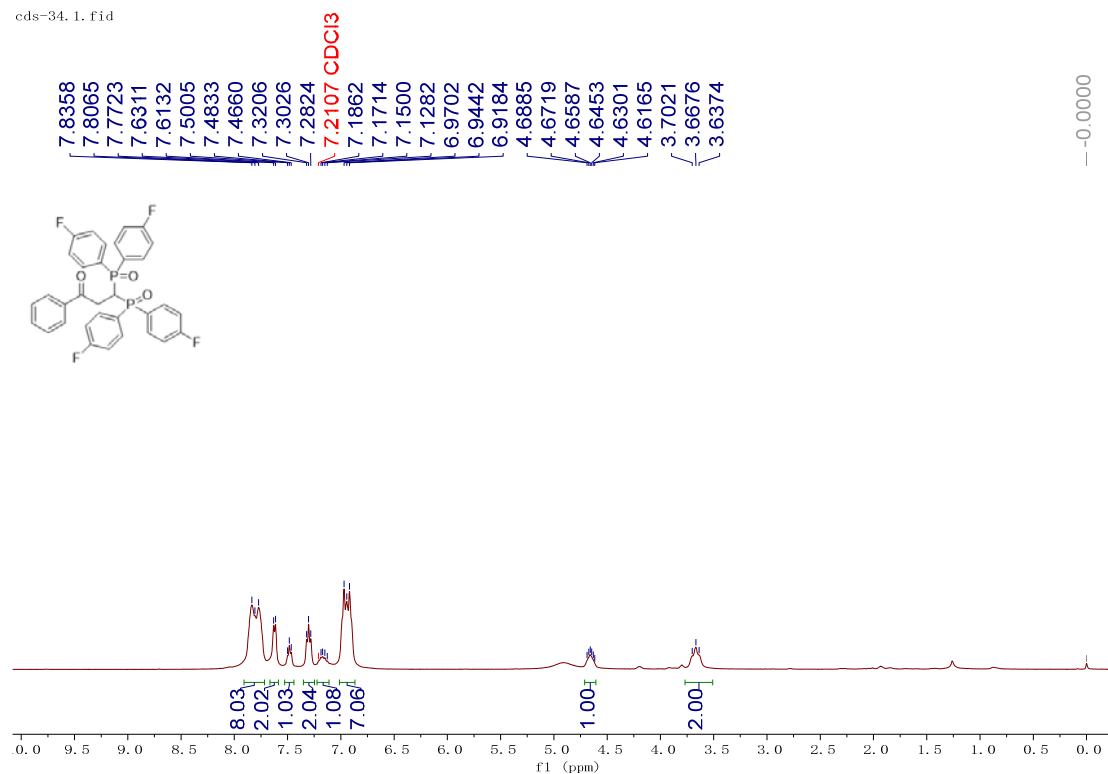

<sup>1</sup>H NMR spectrum of **3q** (400 MHz, CDCl<sub>3</sub>)

cds-43-1.1.fid

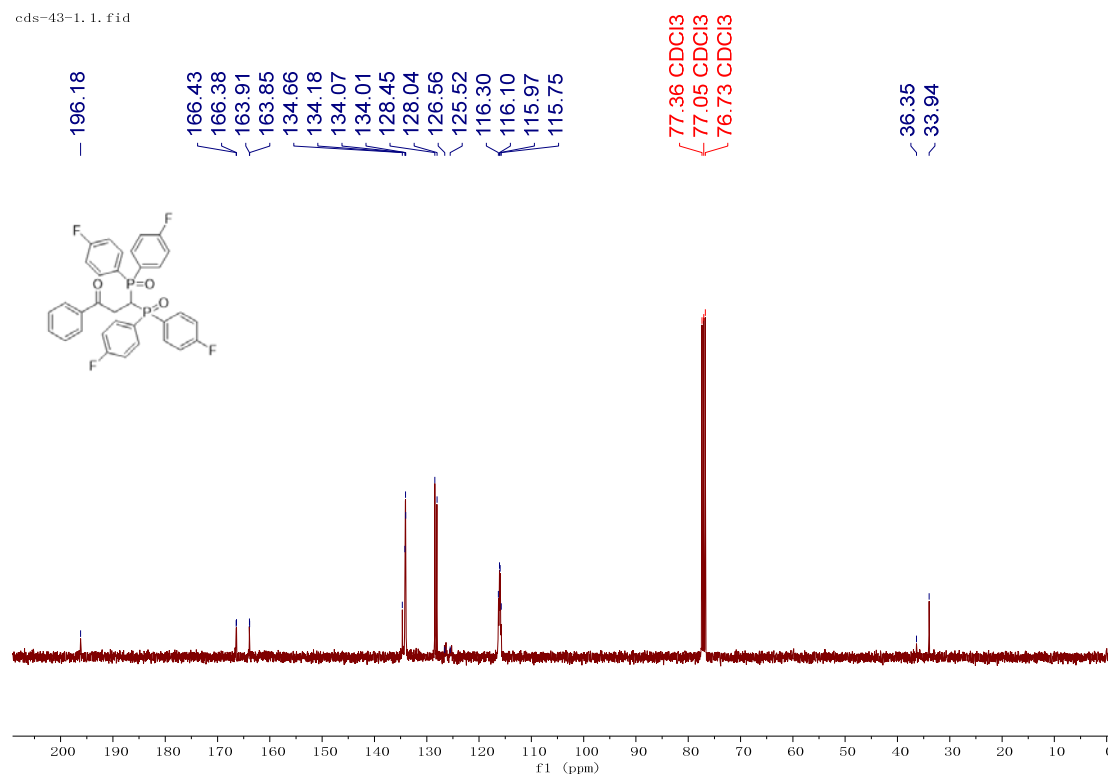

<sup>13</sup>C NMR spectrum of **3q** (100 MHz, CDCl<sub>3</sub>)

cds-34.2.fid

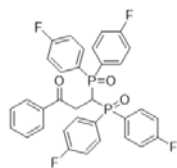

-32.3508

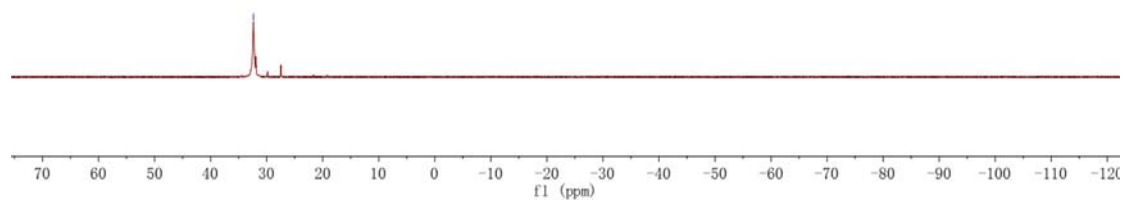

$^{31}\text{P}$  NMR spectrum of **3q** (162 MHz,  $\text{CDCl}_3$ )

cds-34-f.1.fid

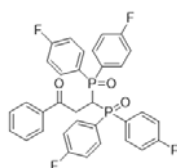

-105.56

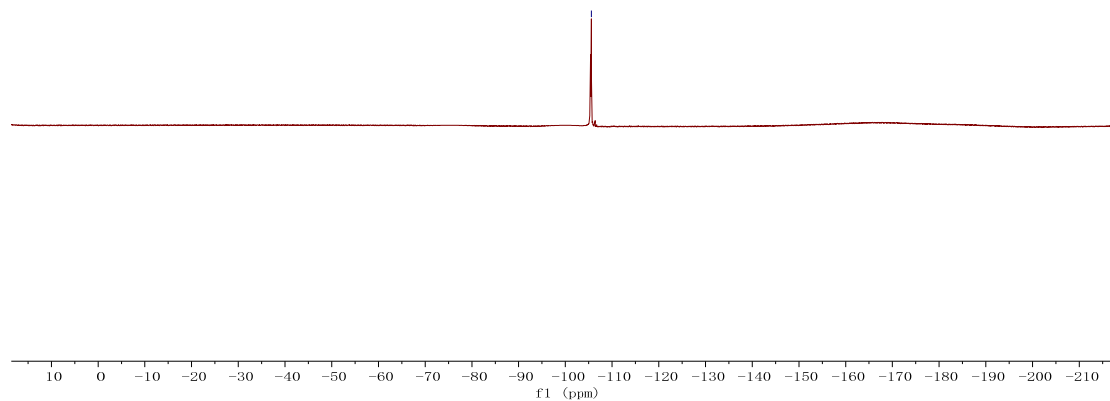

$^{19}\text{F}$  NMR spectrum of **3q** (376 MHz,  $\text{CDCl}_3$ )

cds-33.1.fid

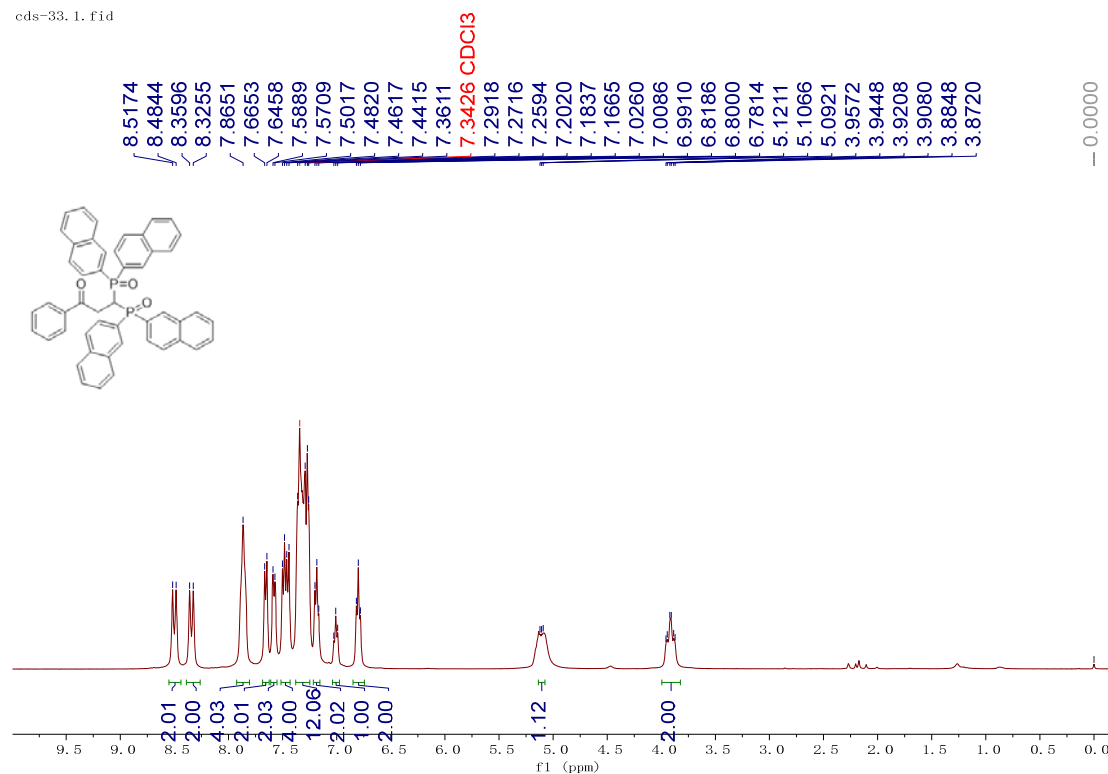

<sup>1</sup>H NMR spectrum of **3r** (400 MHz, CDCl<sub>3</sub>)

cds-33-1.2.fid

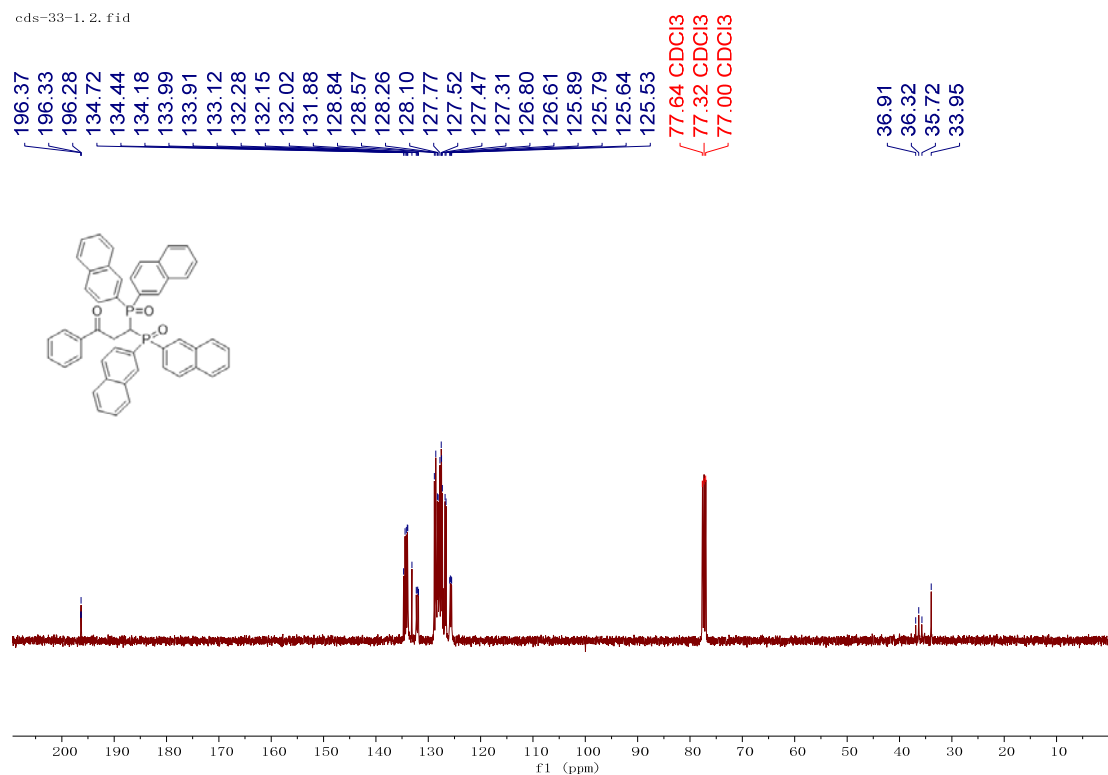

<sup>13</sup>C NMR spectrum of **3r** (100 MHz, CDCl<sub>3</sub>)

cds-33.2.fid

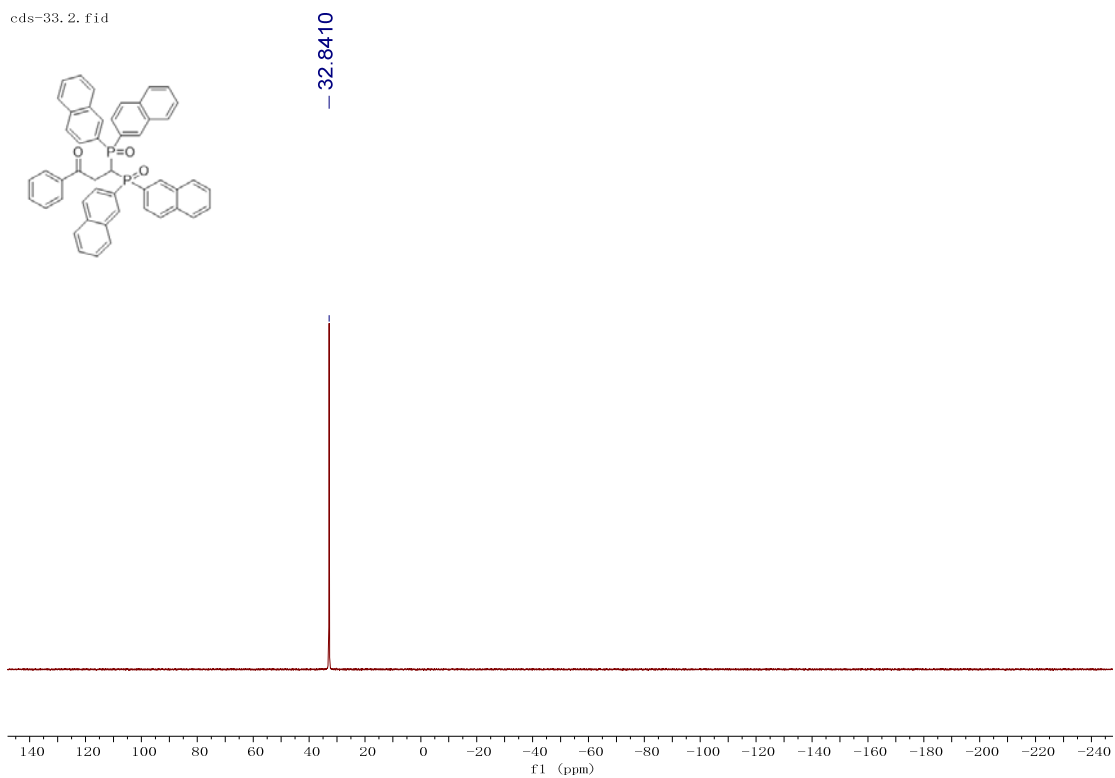

<sup>31</sup>P NMR spectrum of **3r** (162 MHz, CDCl<sub>3</sub>)

cds-27-1.1.fid

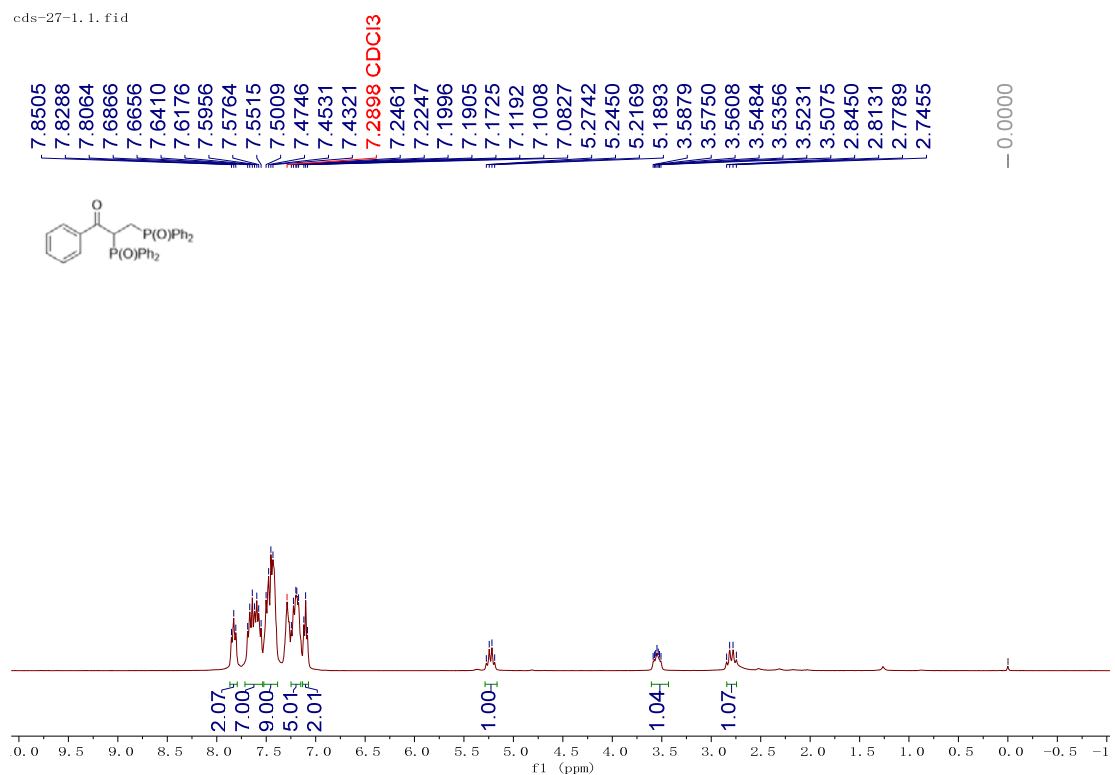

<sup>1</sup>H NMR spectrum of **4a** (400 MHz, CDCl<sub>3</sub>)

cds-27-1-1.2.fid

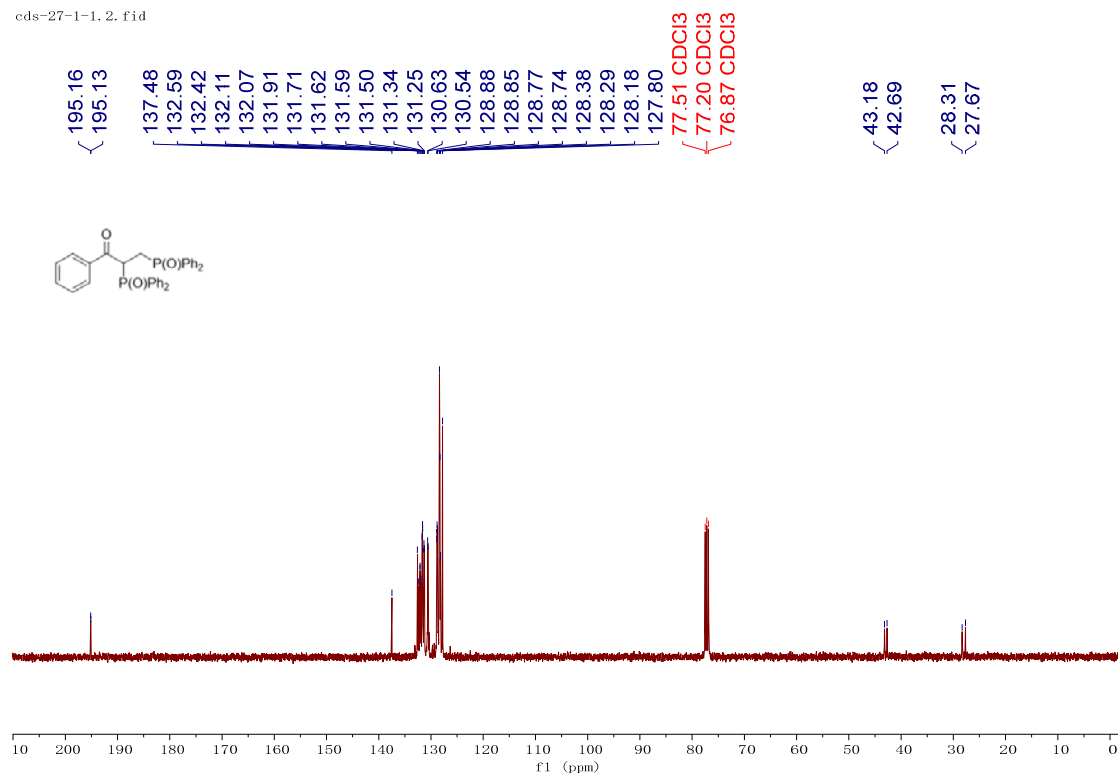

<sup>13</sup>C NMR spectrum of **4a** (100 MHz, CDCl<sub>3</sub>)

cds-27-1.2.fid

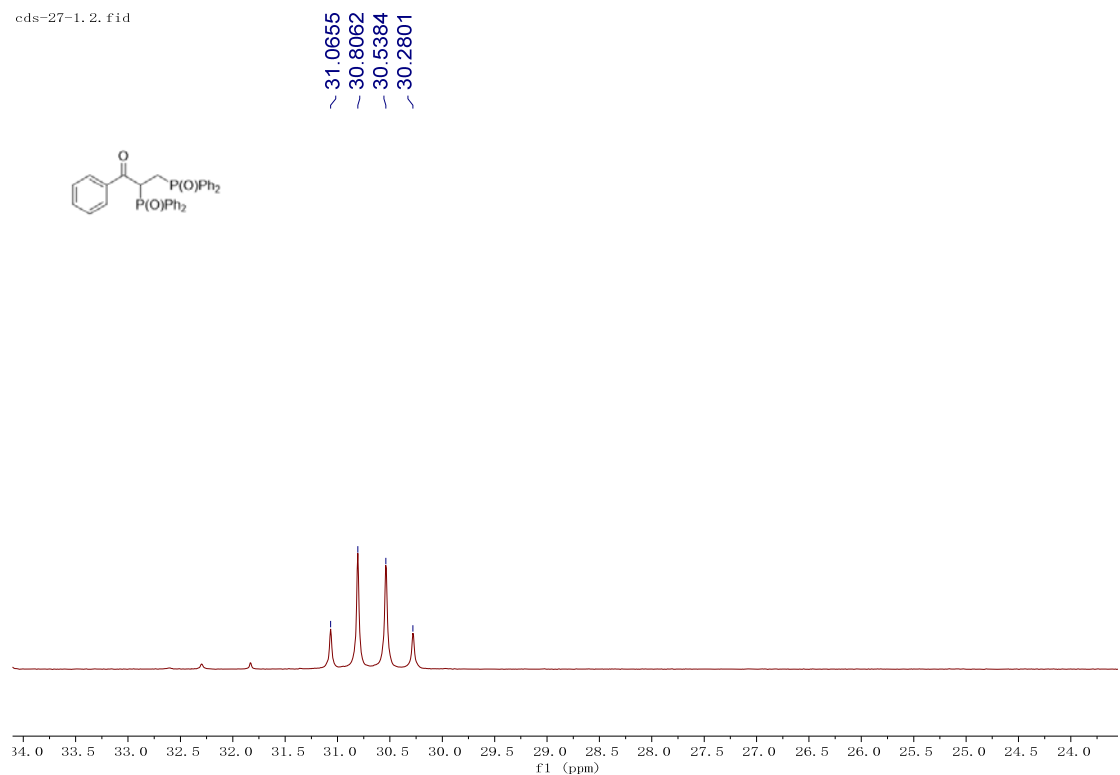

<sup>31</sup>P NMR spectrum of **4a** (162 MHz, CDCl<sub>3</sub>)

cds-56-1-1.1.fid

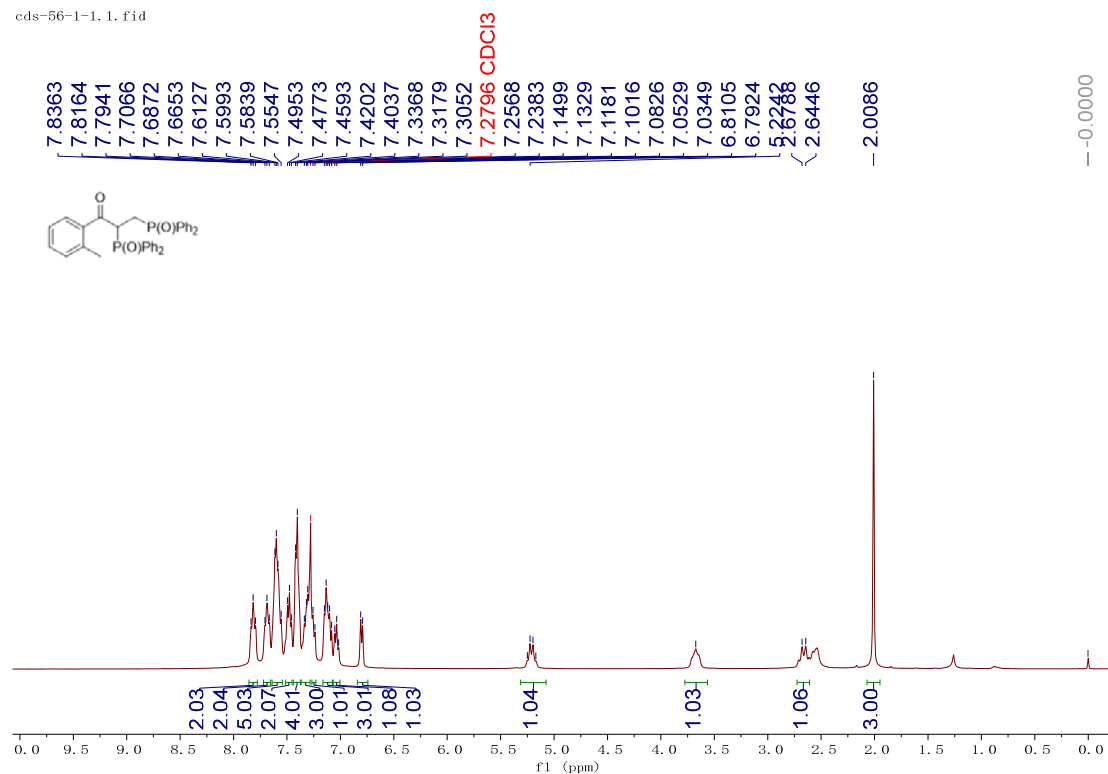

cds-56-1.1.fid

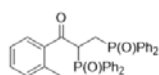

31.0903  
30.8356  
30.5969  
30.3469

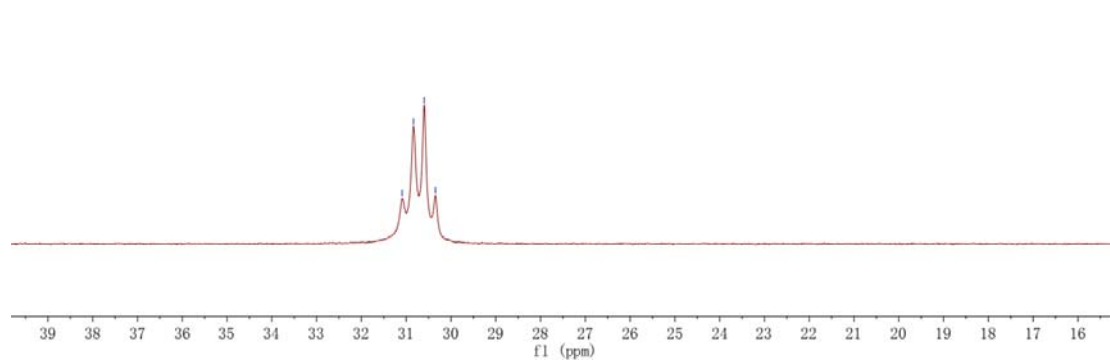

<sup>31</sup>P NMR spectrum of **4b** (162 MHz, CDCl<sub>3</sub>)

cds-35.1.fid

7.8225  
7.7989  
7.6817  
7.6448  
7.6324  
7.5953  
7.5845  
7.5638  
7.5374  
7.5037  
7.4862  
7.4318  
7.3678  
7.3483  
7.3150  
7.2952  
7.2527 CDC13  
7.2347  
7.2161  
7.1907  
7.1686  
6.9061  
6.8868  
6.8682  
3.5514  
3.5382  
3.5262  
3.5134  
3.5008  
3.4854  
2.8297  
2.7949  
2.7599  
2.7245  
2.2570

-0.0000

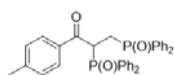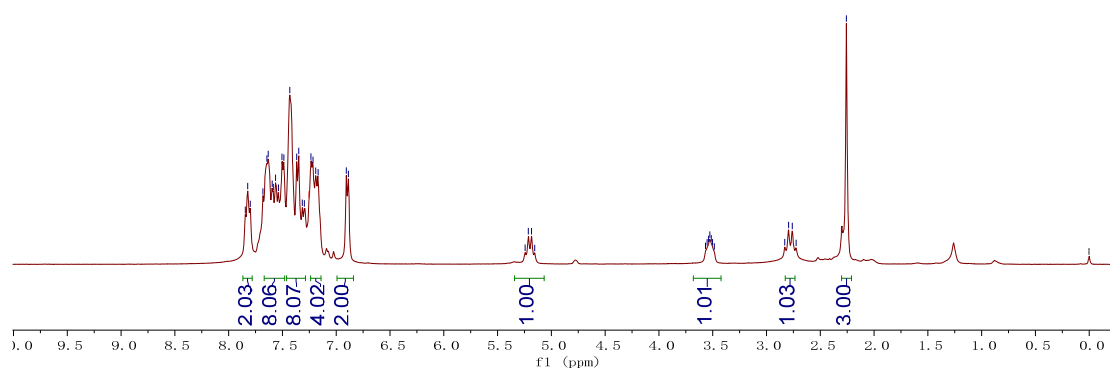

<sup>1</sup>H NMR spectrum of **4c** (400 MHz, CDCl<sub>3</sub>)



csd-35-c. 1. fid

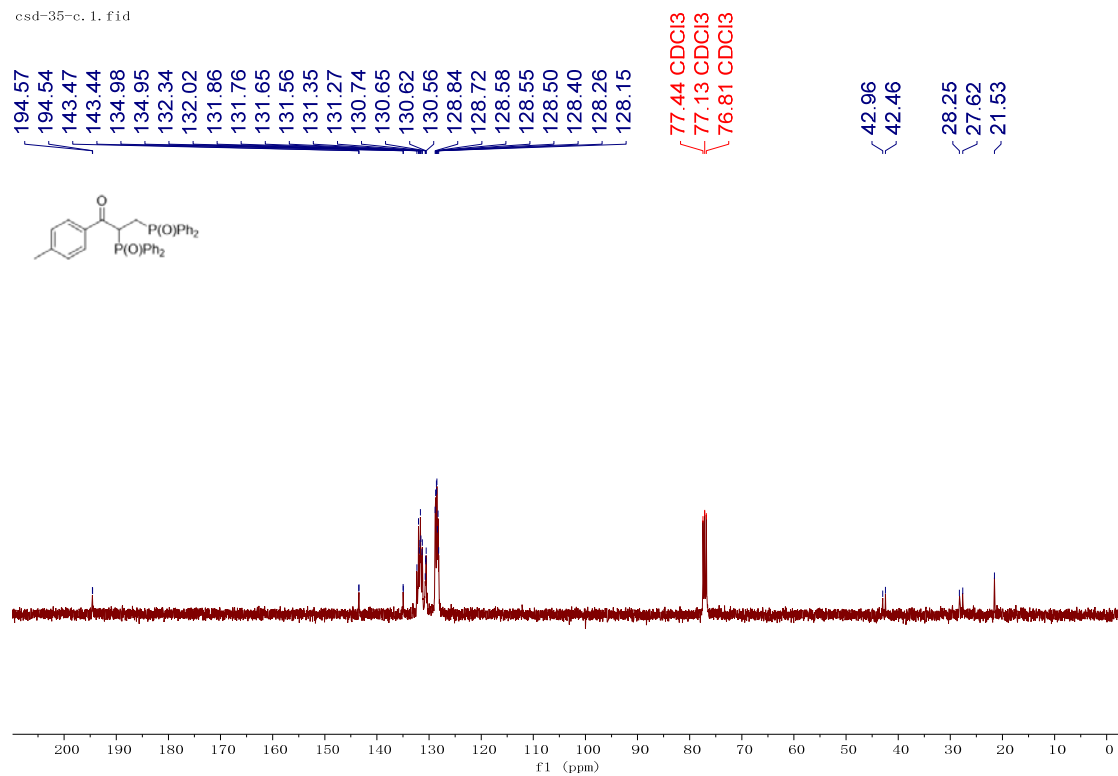

<sup>13</sup>C NMR spectrum of **4c** (100 MHz, CDCl<sub>3</sub>)

cds-35.2. fid

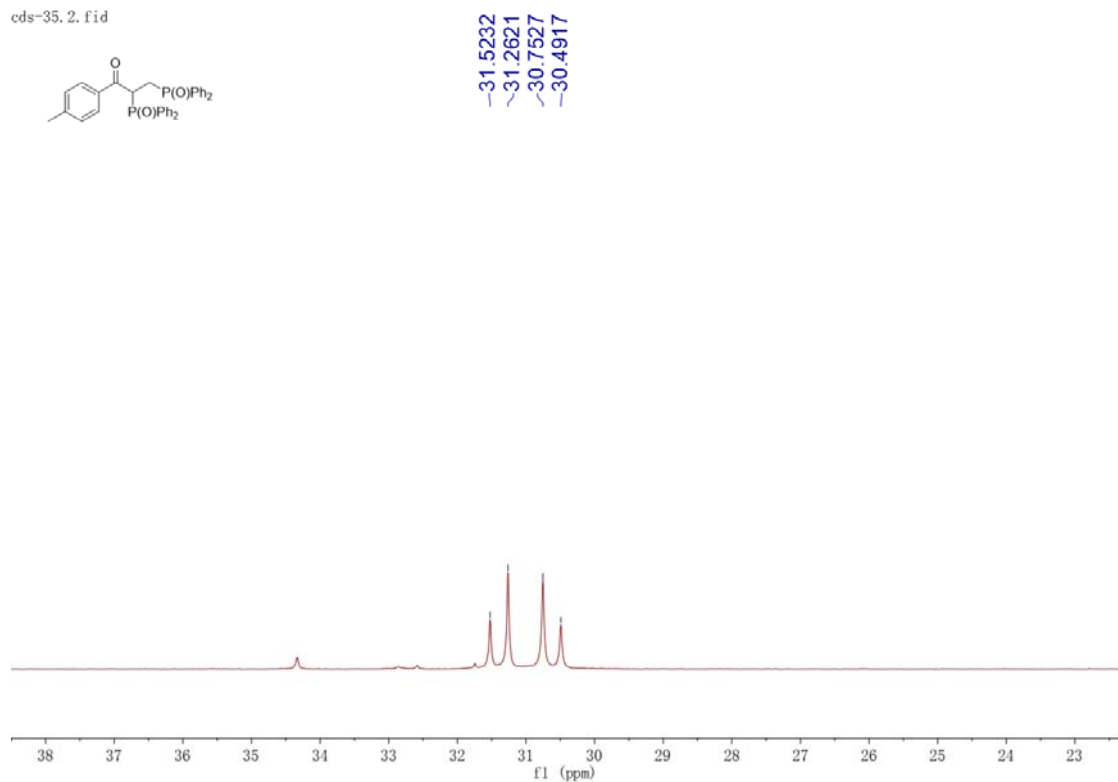

<sup>31</sup>P NMR spectrum of **4c** (162 MHz, CDCl<sub>3</sub>)

cds-41. 1. fid

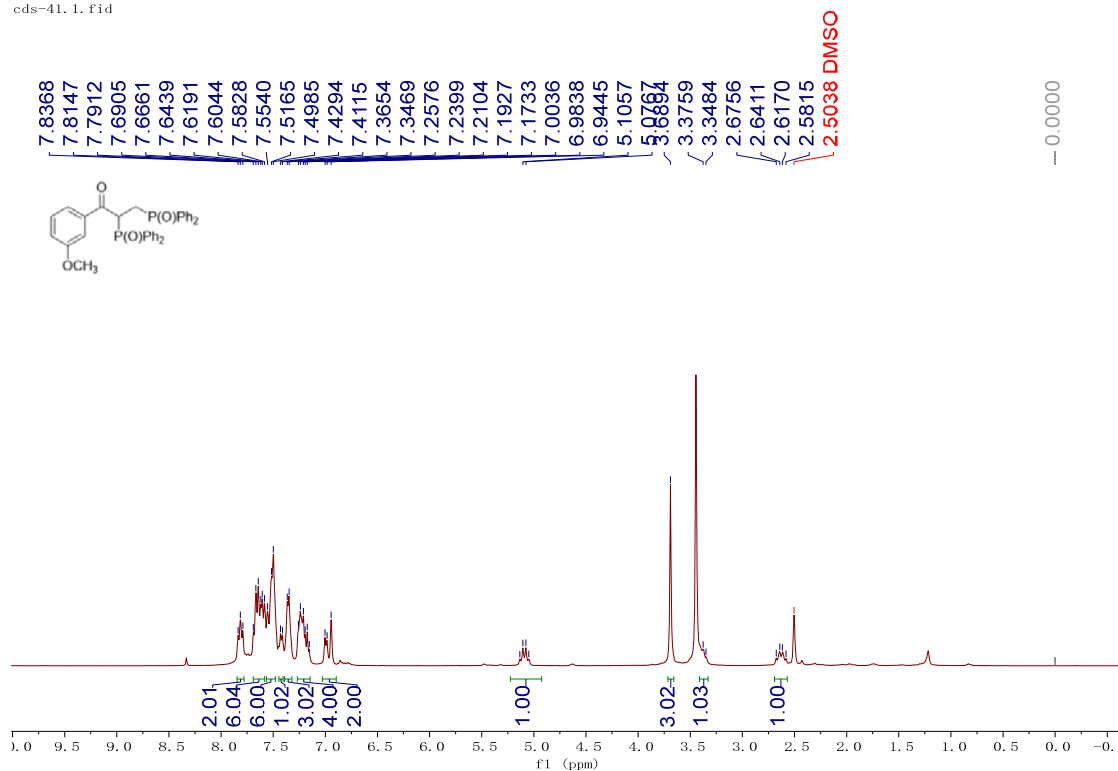

<sup>1</sup>H NMR spectrum of **4d** (400 MHz, DMSO-*d*<sub>6</sub>)

cds-41c. 10. fid

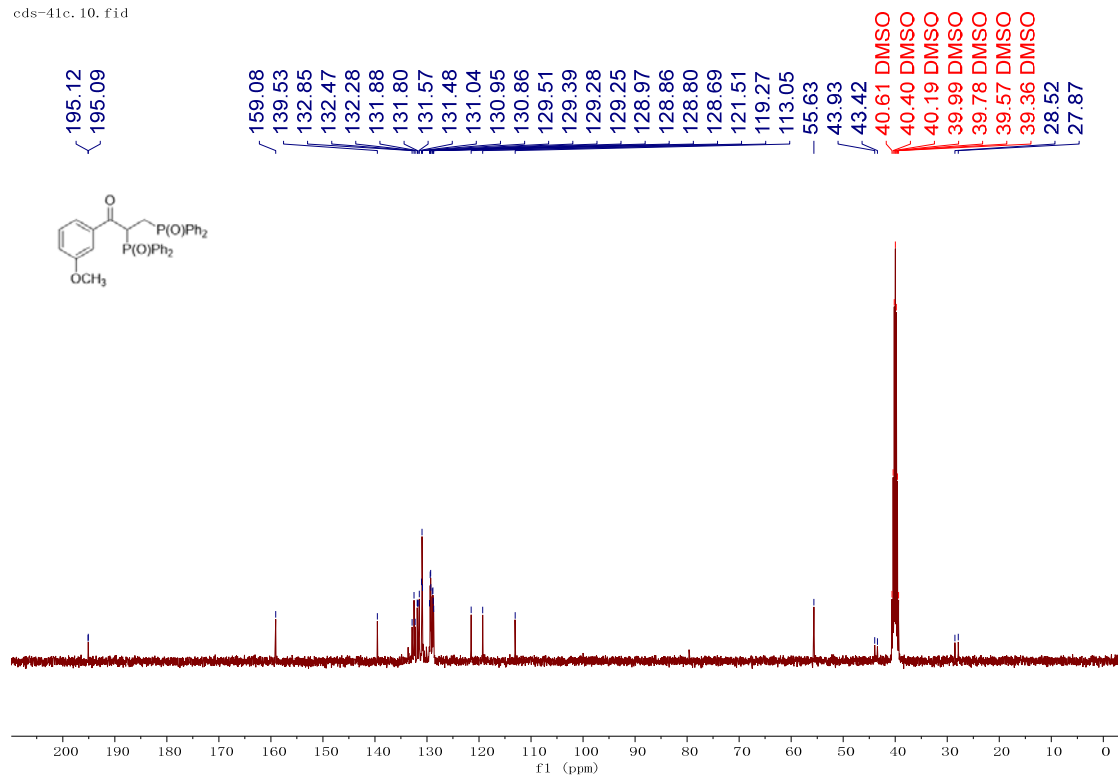

<sup>13</sup>C NMR spectrum of **4d** (100 MHz, DMSO-*d*<sub>6</sub>)

cds-41.2.fid

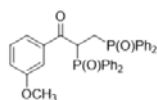

~29.4116  
~29.1381  
~28.5823  
~28.3081

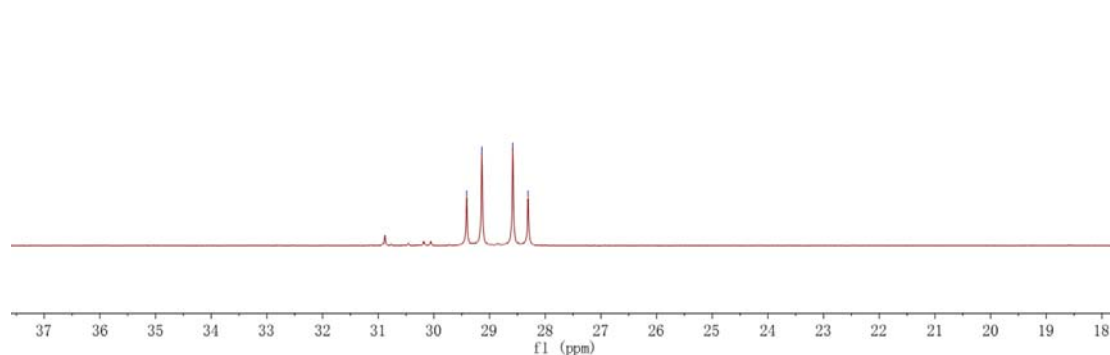

$^{31}\text{P}$  NMR spectrum of **4d** (162 MHz, DMSO- $d_6$ )

cds-36.1.fid

7.8291  
7.6591  
7.5582  
7.5311  
7.5064  
7.4873  
7.4714  
7.4494  
7.4421  
7.4227  
7.2513 CDCl<sub>3</sub>  
7.2353  
7.1832  
6.5988  
6.5779  
5.2209  
5.1904  
5.1601  
5.1295  
3.7610  
3.5552  
3.5398  
3.5136  
3.4897  
3.4743  
2.8277  
2.7921  
2.7566  
-0.0000

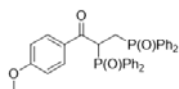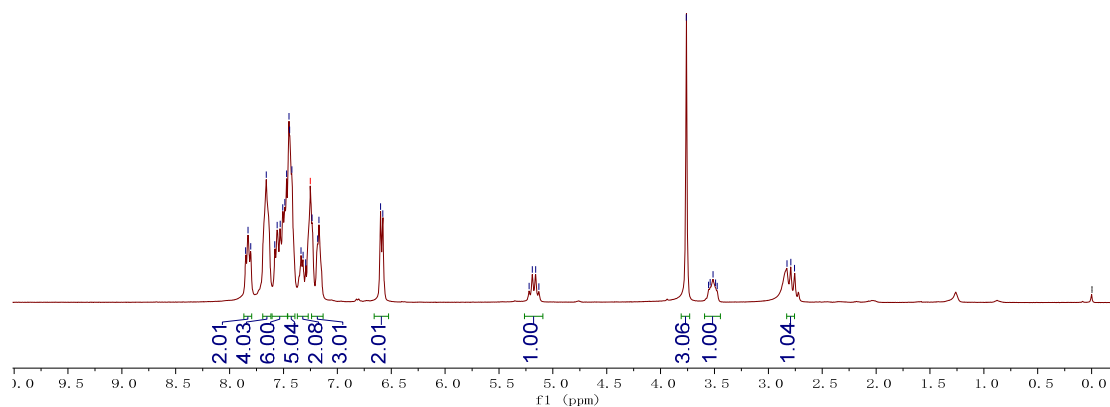

$^1\text{H}$  NMR spectrum of **4e** (400 MHz, CDCl<sub>3</sub>)

csd-36-c. 1. fid

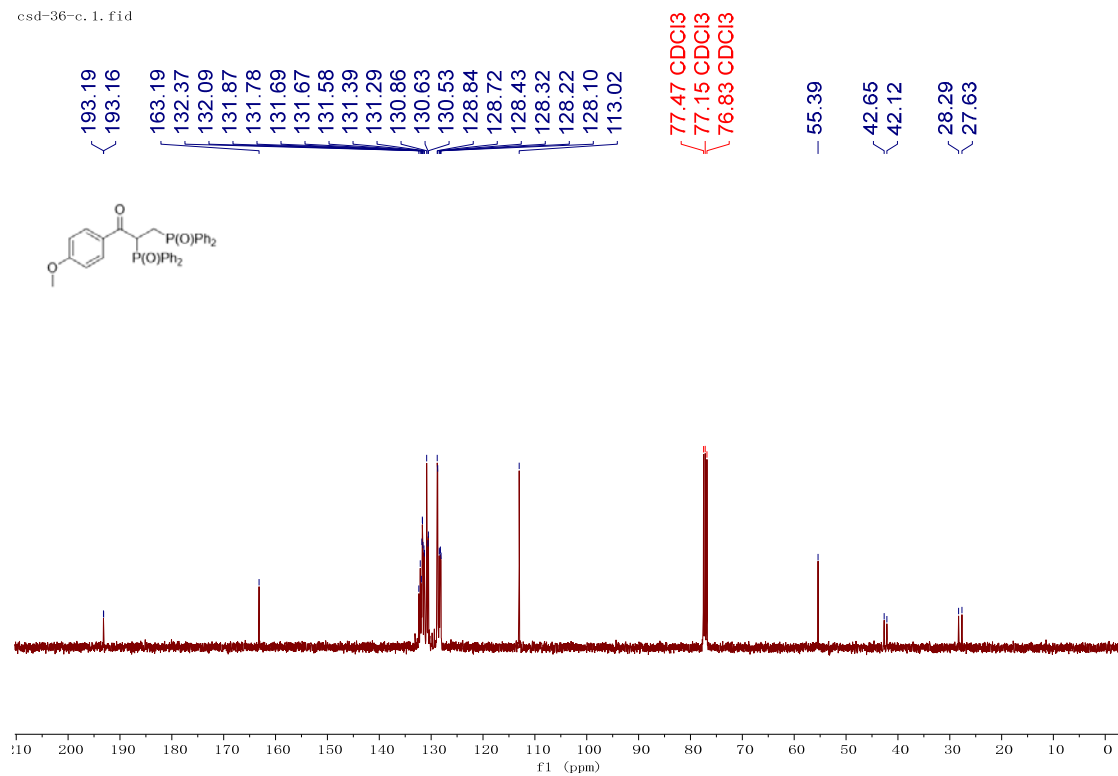

<sup>13</sup>C NMR spectrum of **4e** (100 MHz, CDCl<sub>3</sub>)

cds-36.2. fid

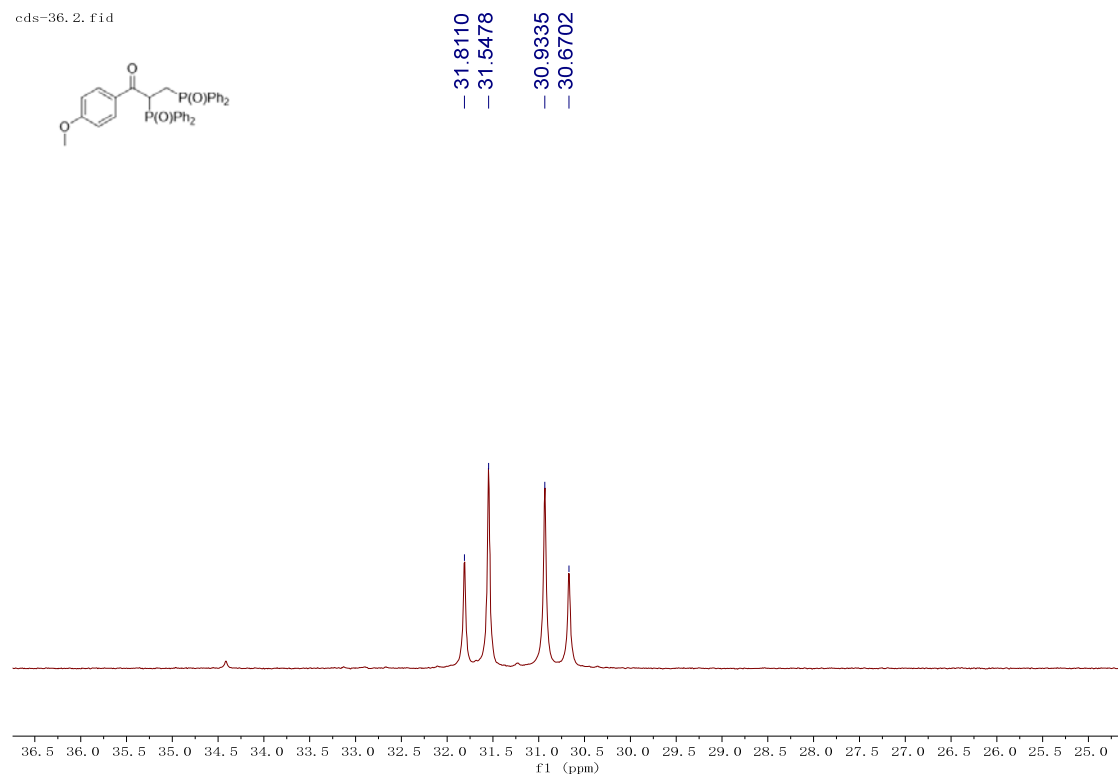

<sup>31</sup>P NMR spectrum of **4e** (162 MHz, CDCl<sub>3</sub>)

CDS-50.1.fid

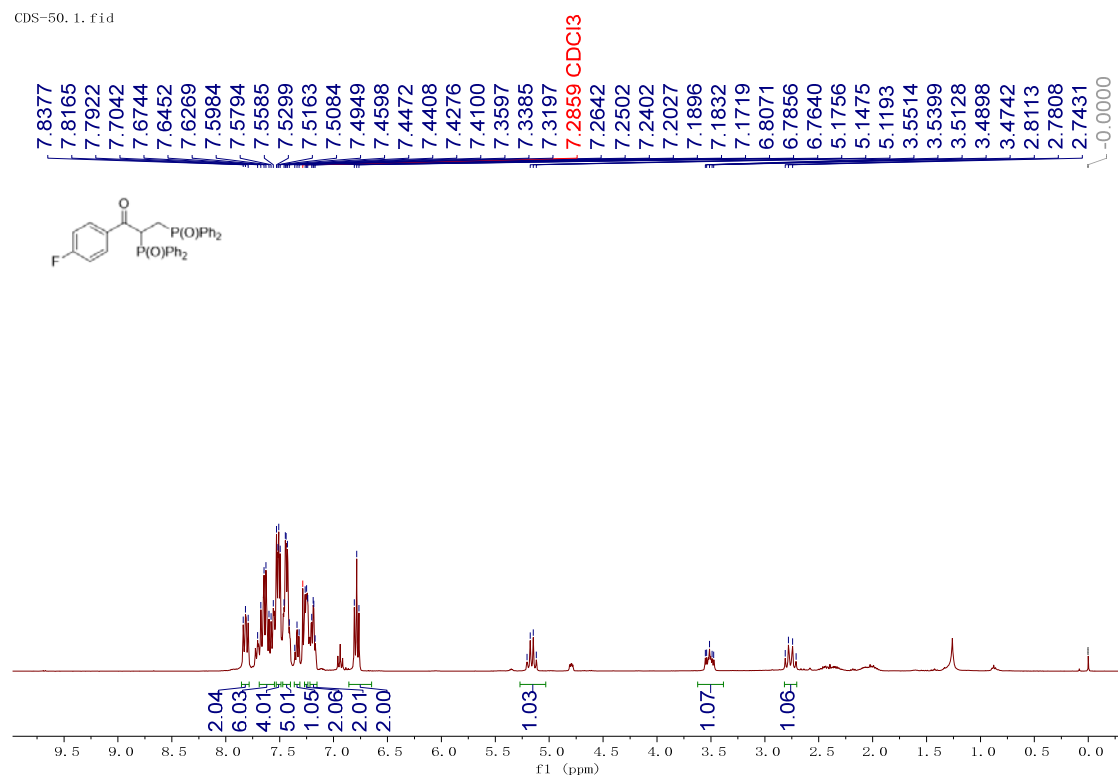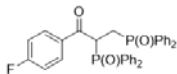

<sup>1</sup>H NMR spectrum of **4f** (400 MHz, CDCl<sub>3</sub>)

eds-50-c.1.fid

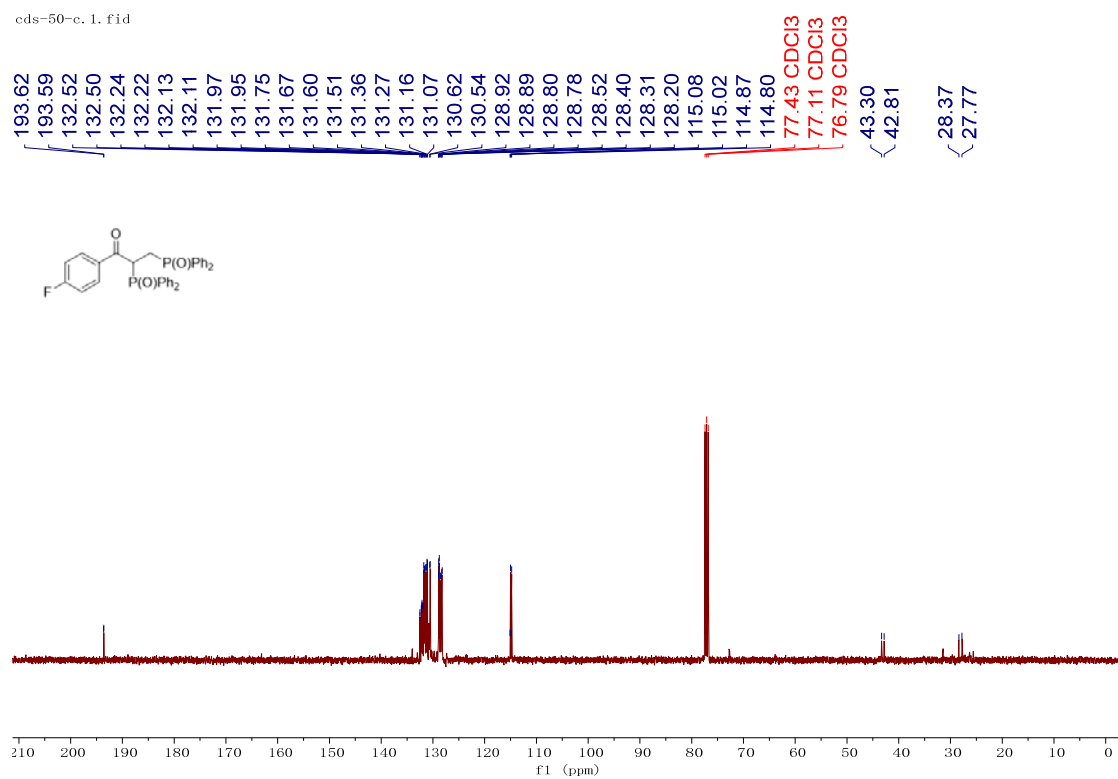

<sup>13</sup>C NMR spectrum of **4f** (100 MHz, CDCl<sub>3</sub>)

CDS-50. 2. fid

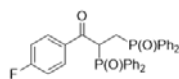

31.1990  
30.9411  
30.6667  
30.3913

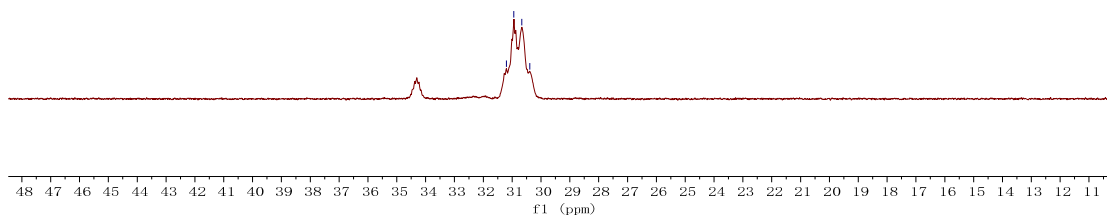

<sup>31</sup>P NMR spectrum of **4f** (162 MHz, CDCl<sub>3</sub>)

cds-50-f. 1. fid

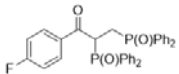

-105.39

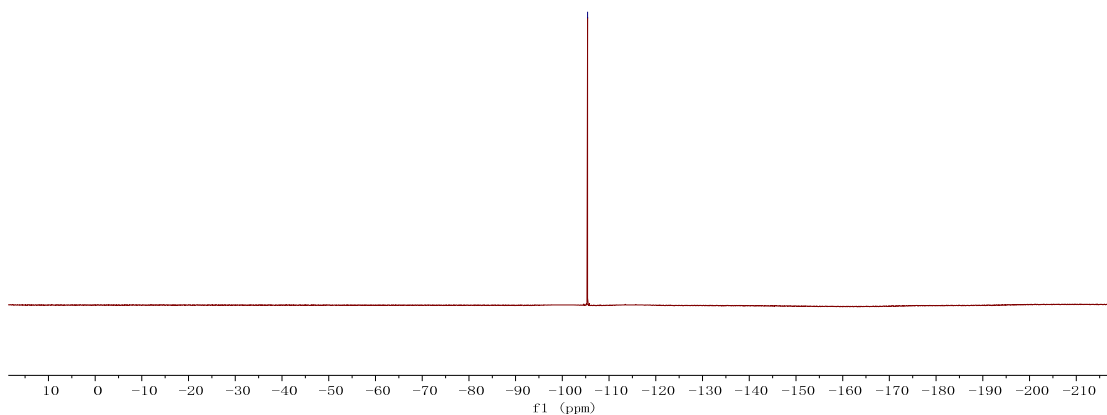

<sup>19</sup>F NMR spectrum of **4f** (376 MHz, CDCl<sub>3</sub>)

cds-68-1.1.fid

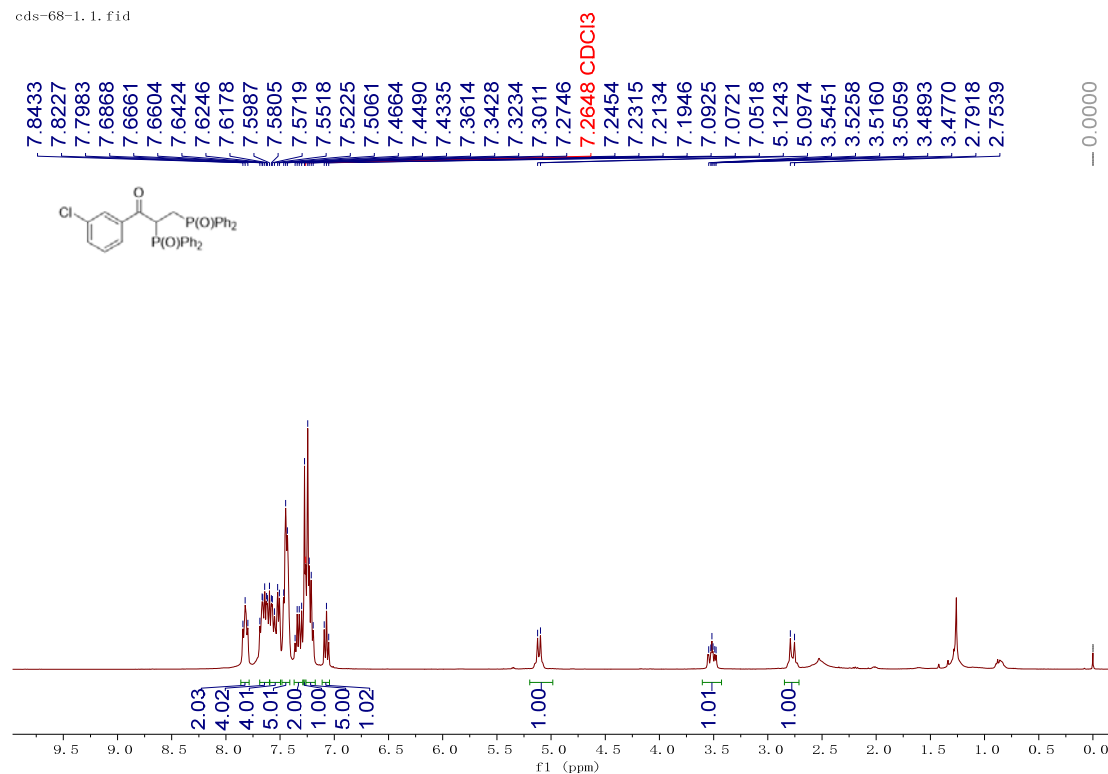

<sup>1</sup>H NMR spectrum of **4g** (400 MHz, CDCl<sub>3</sub>)

cds-68-c.1.fid

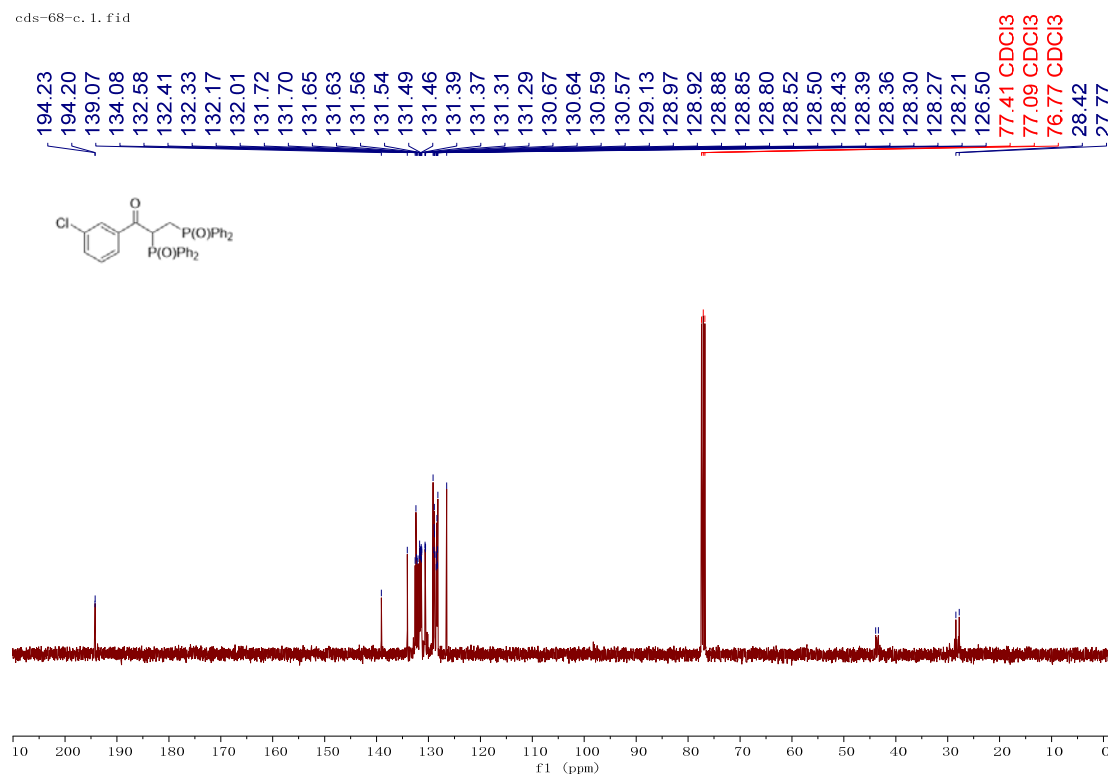

<sup>13</sup>C NMR spectrum of **4g** (100 MHz, CDCl<sub>3</sub>)

cds-68-1.2.fid

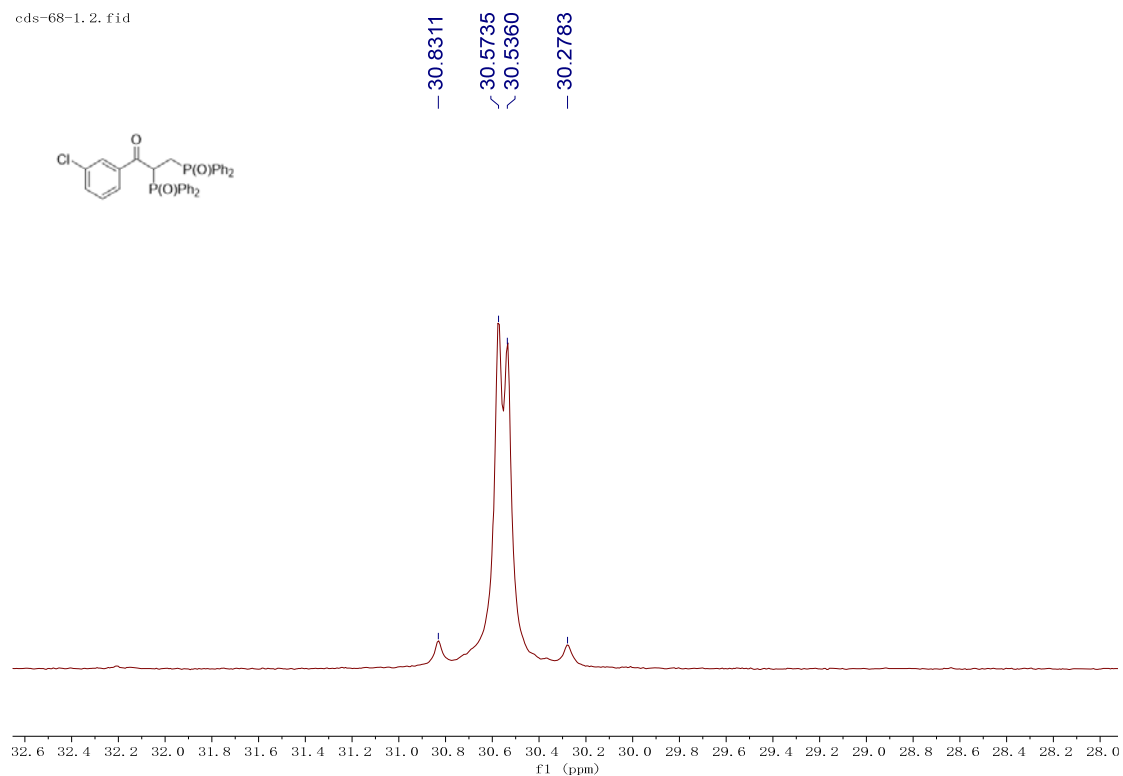

$^{31}\text{P}$  NMR spectrum of **4g** (162 MHz,  $\text{CDCl}_3$ )

cds-43.1.fid

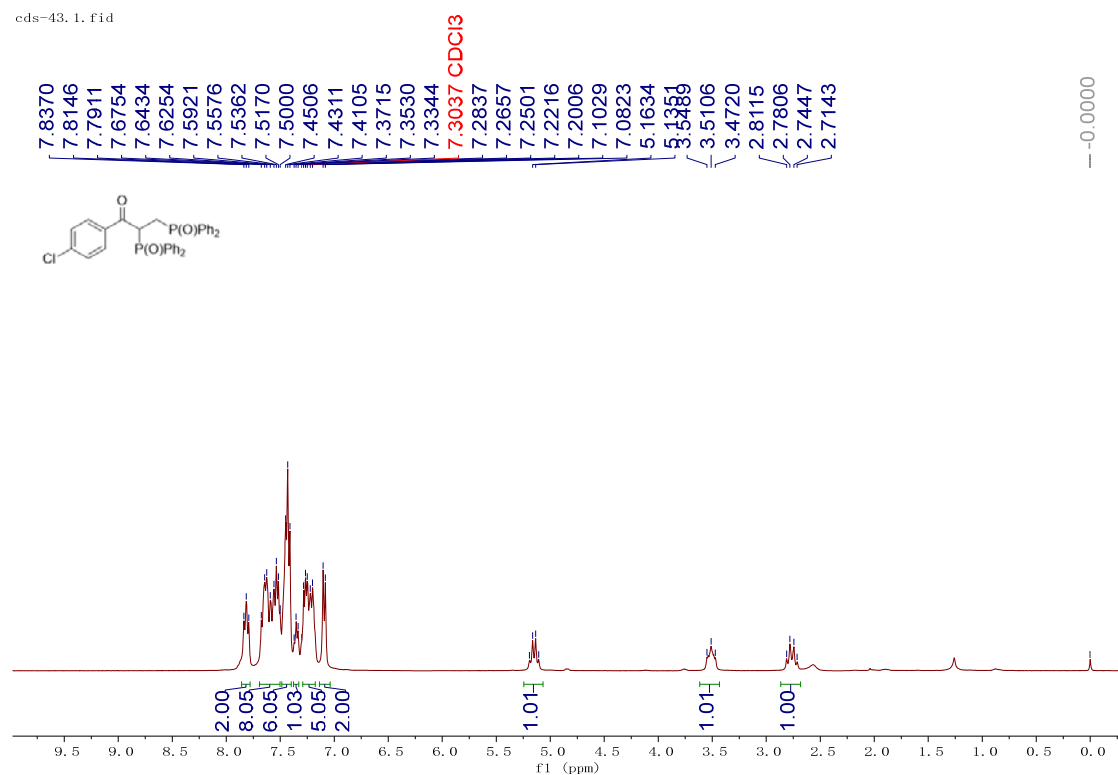

$^1\text{H}$  NMR spectrum of **4h** (400 MHz,  $\text{CDCl}_3$ )



cds-43c.10.fid

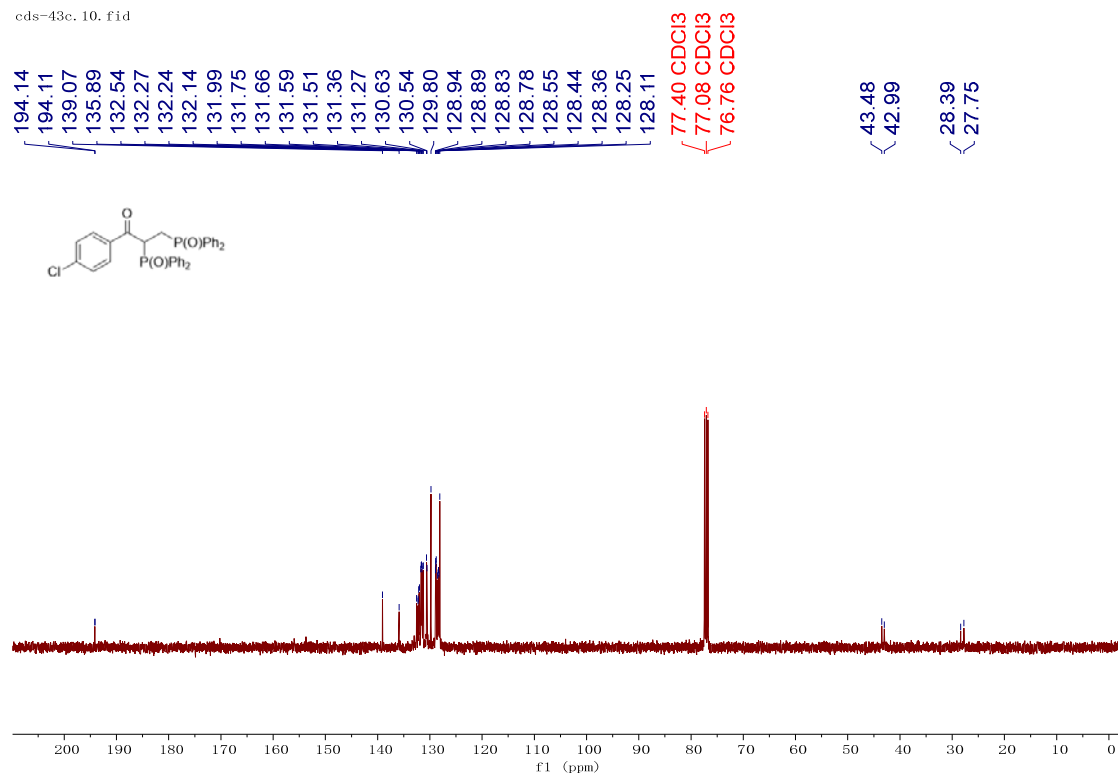

cds-43.2.fid

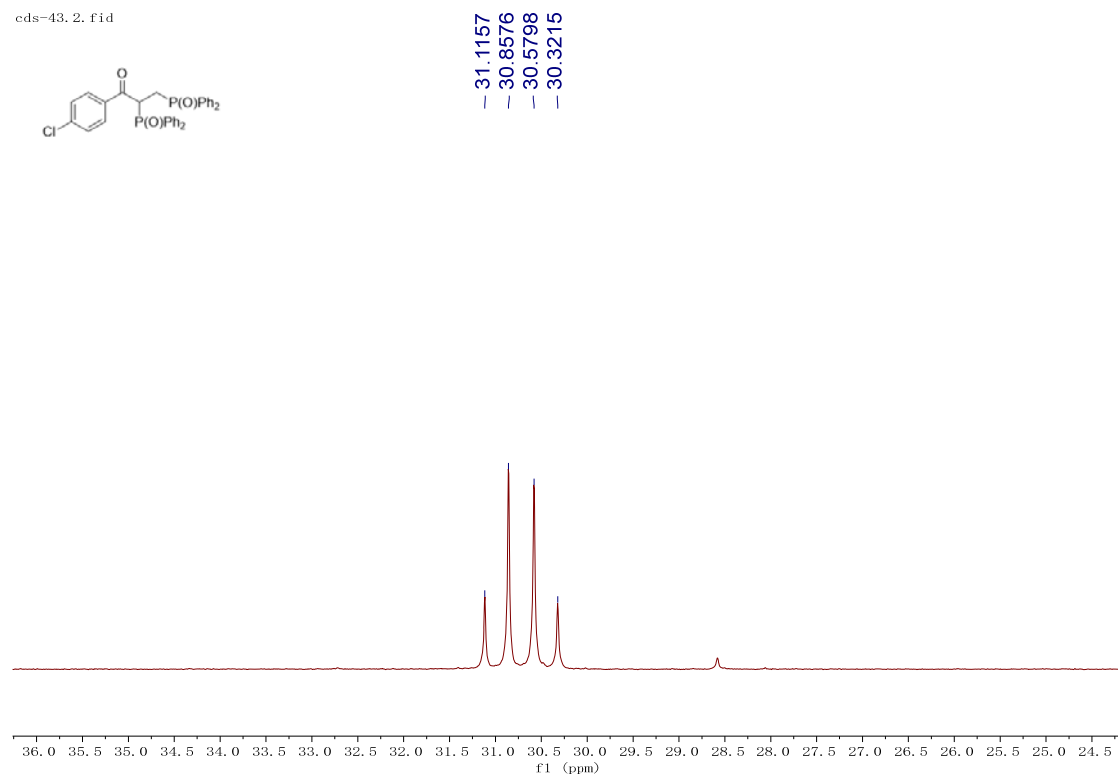

cds-55.1.fid

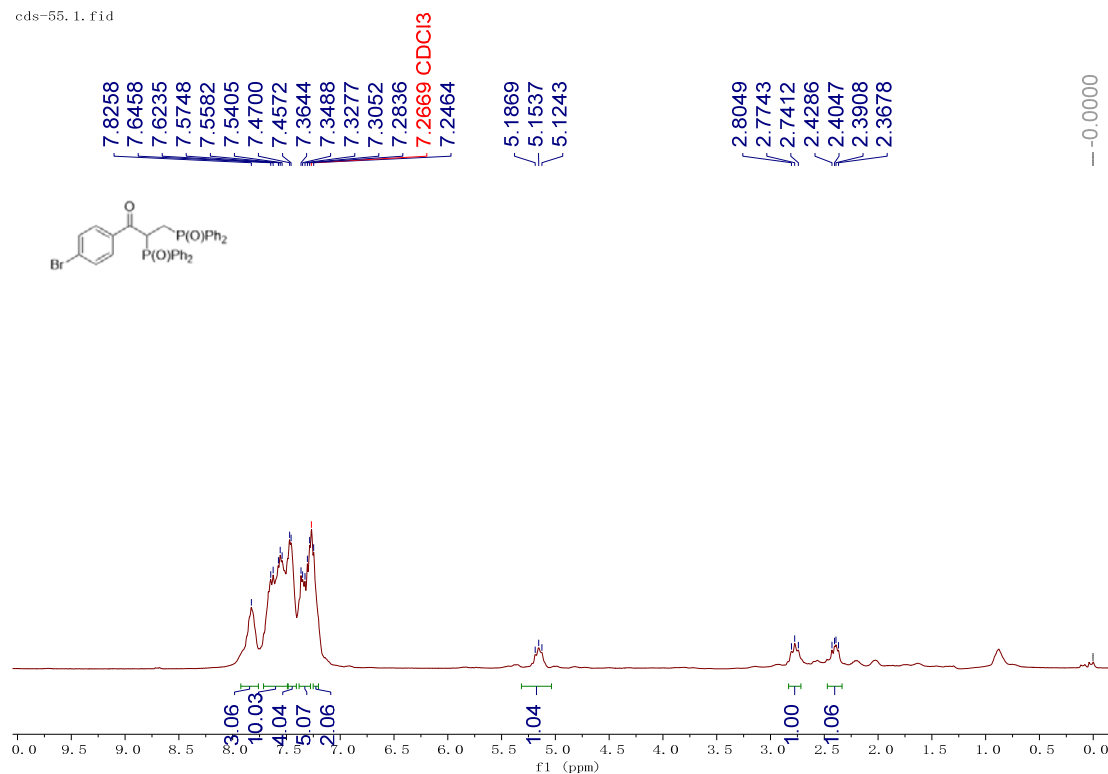

<sup>1</sup>H NMR spectrum of **4i** (400 MHz, CDCl<sub>3</sub>)

CDS-55C.1.fid

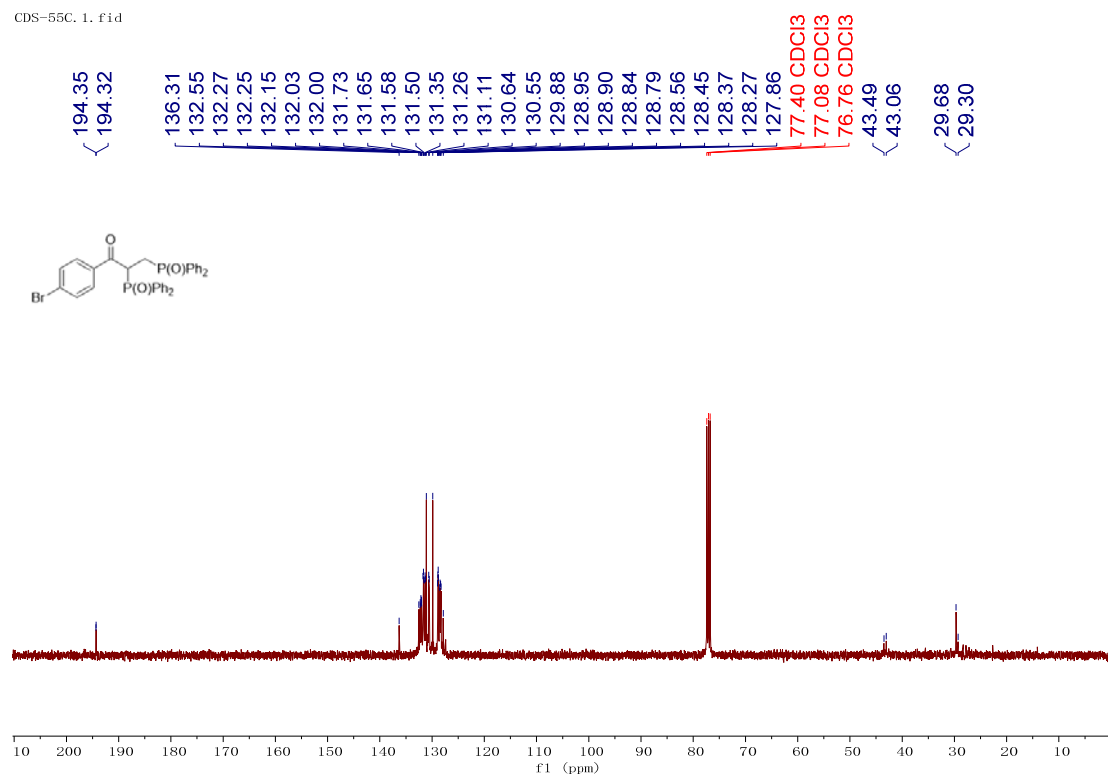

<sup>13</sup>C NMR spectrum of **4i** (100 MHz, CDCl<sub>3</sub>)

cds-55.2.fid

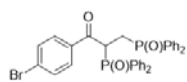

31.1396  
30.8812  
30.6443  
30.3849

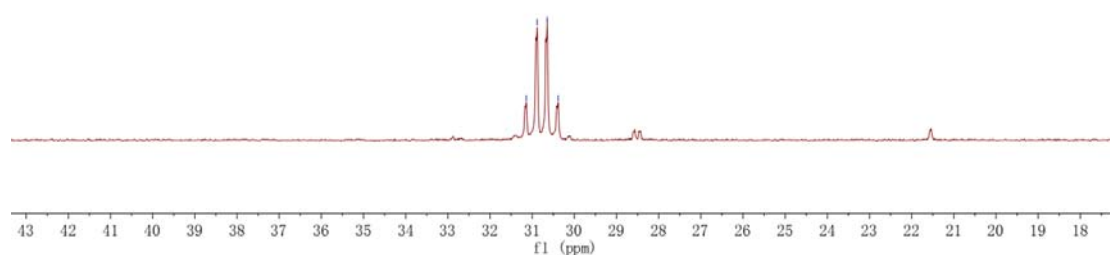

<sup>31</sup>P NMR spectrum of **4i** (162 MHz, CDCl<sub>3</sub>)

cds-67-1.1.fid

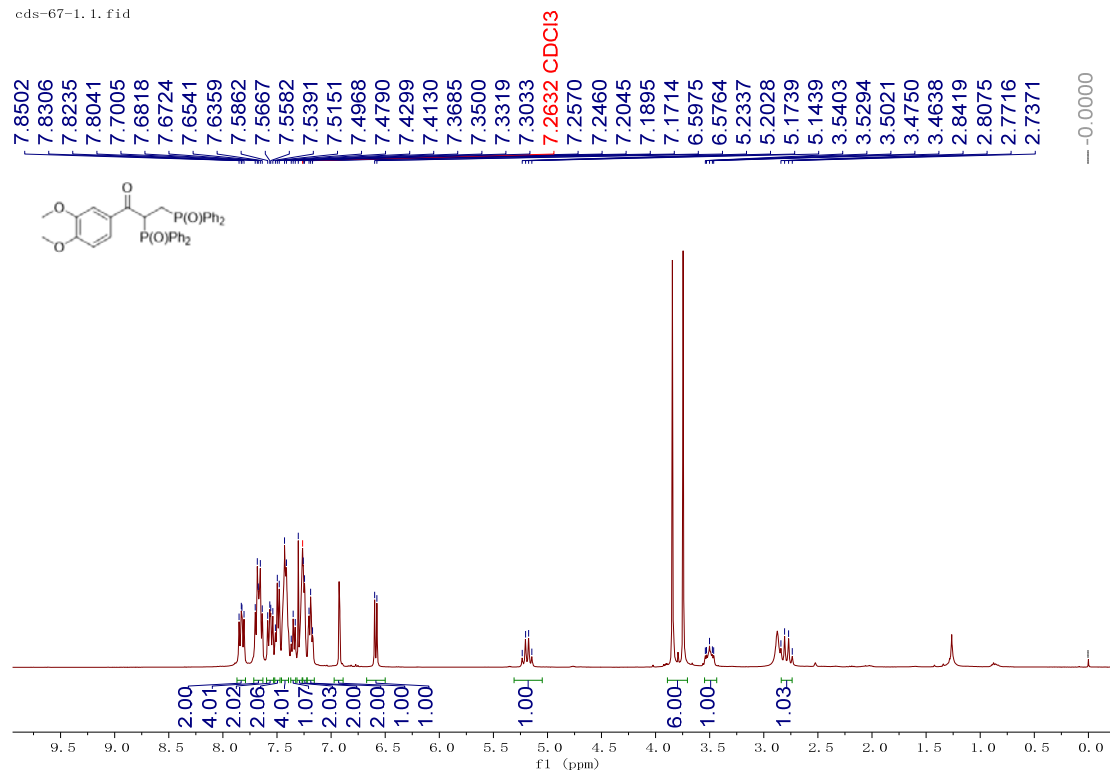

<sup>1</sup>H NMR spectrum of **4j** (400 MHz, CDCl<sub>3</sub>)

cds-67-c.1.fid

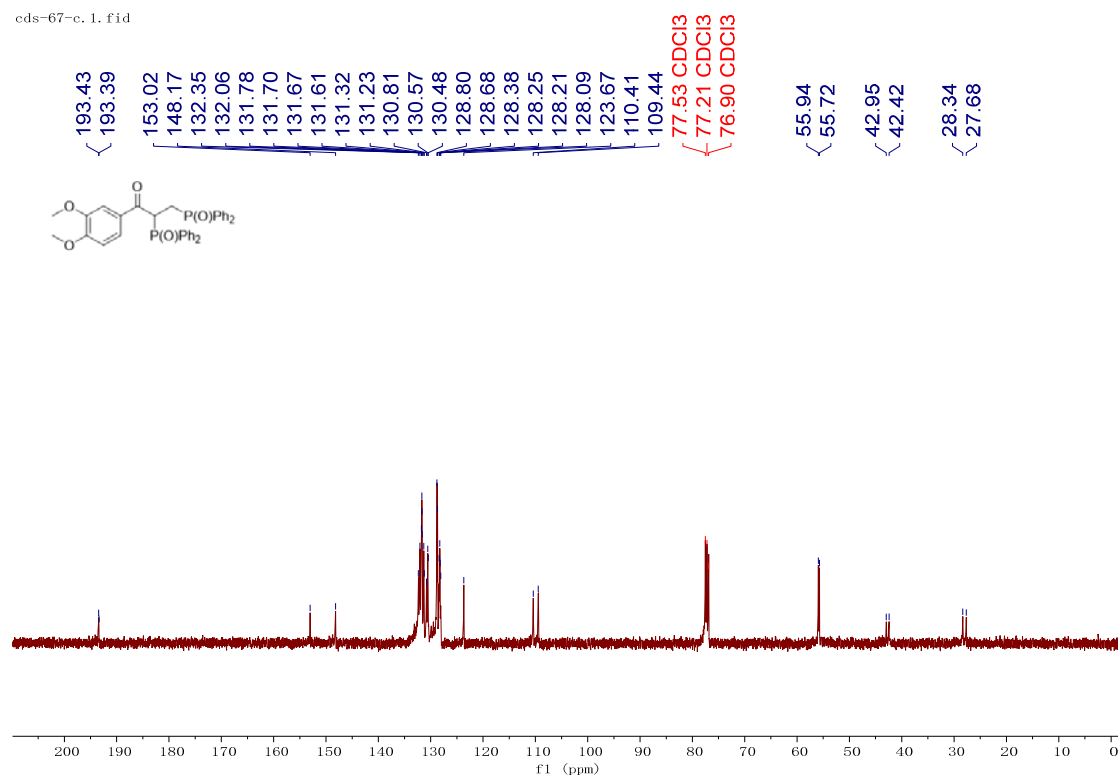

$^{13}\text{C}$  NMR spectrum of **4j** (100 MHz,  $\text{CDCl}_3$ )

cds-67-1.2.fid

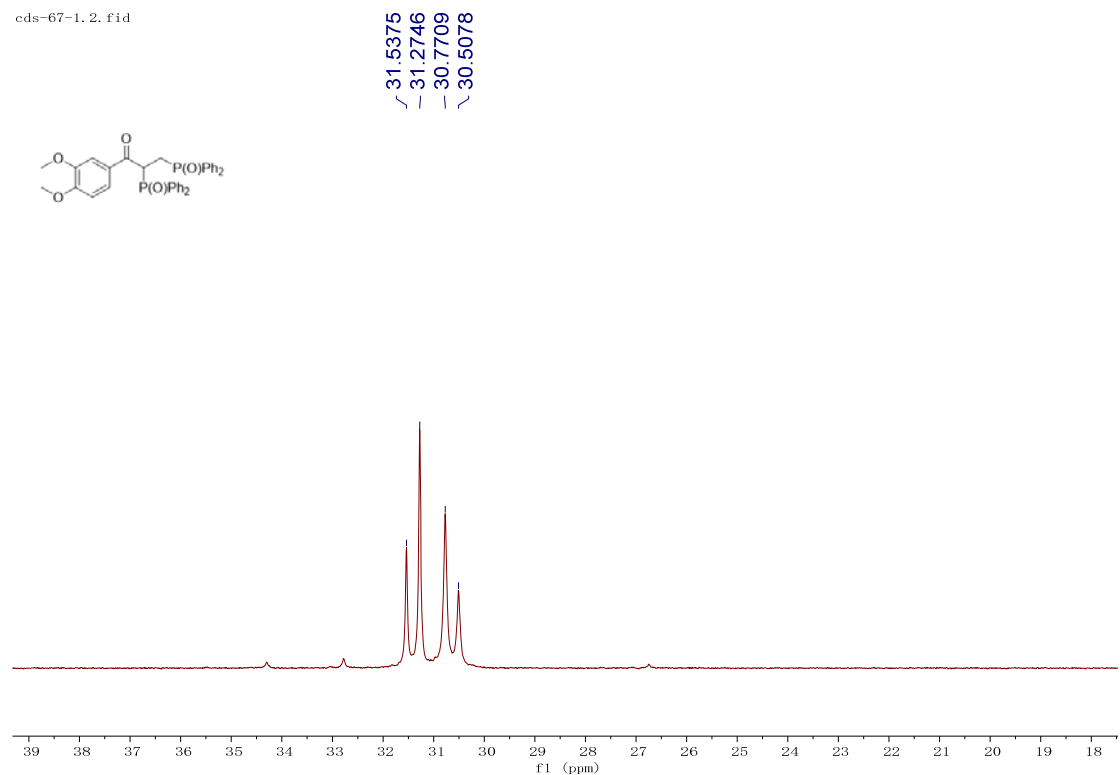

$^{31}\text{P}$  NMR spectrum of **4j** (162 MHz,  $\text{CDCl}_3$ )

cds-38.1.fid

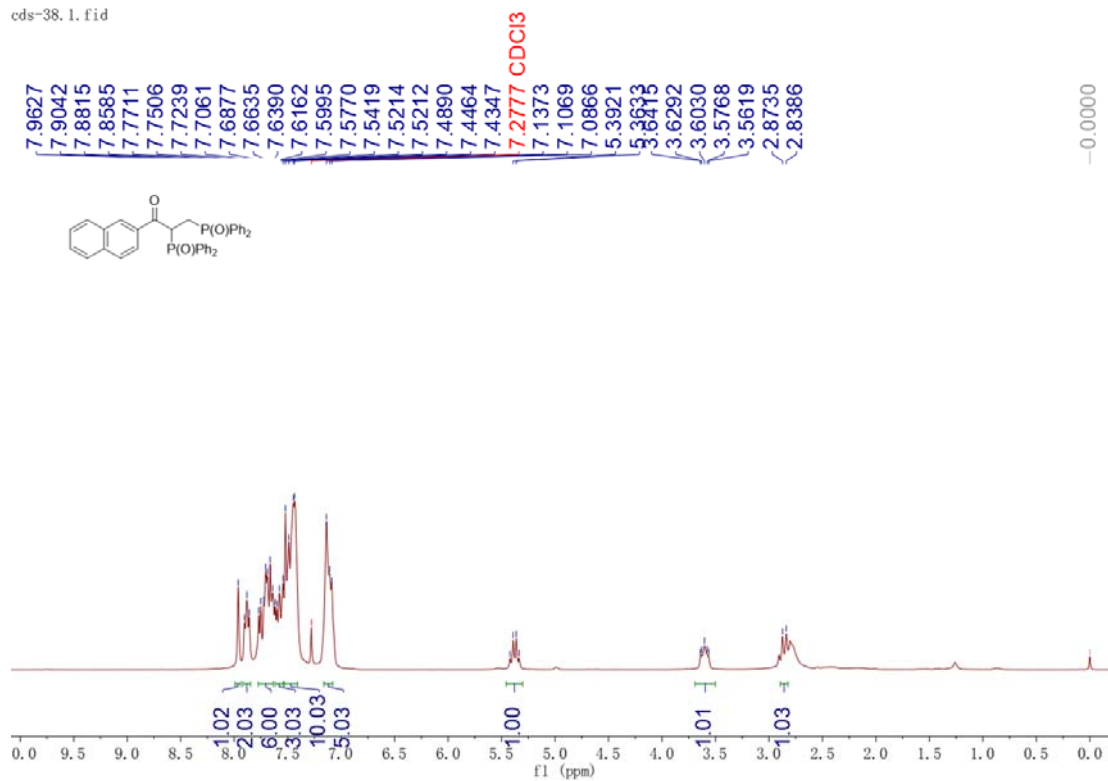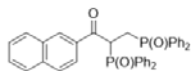

<sup>1</sup>H NMR spectrum of **4k** (400 MHz, CDCl<sub>3</sub>)

csd-38-c.1.fid

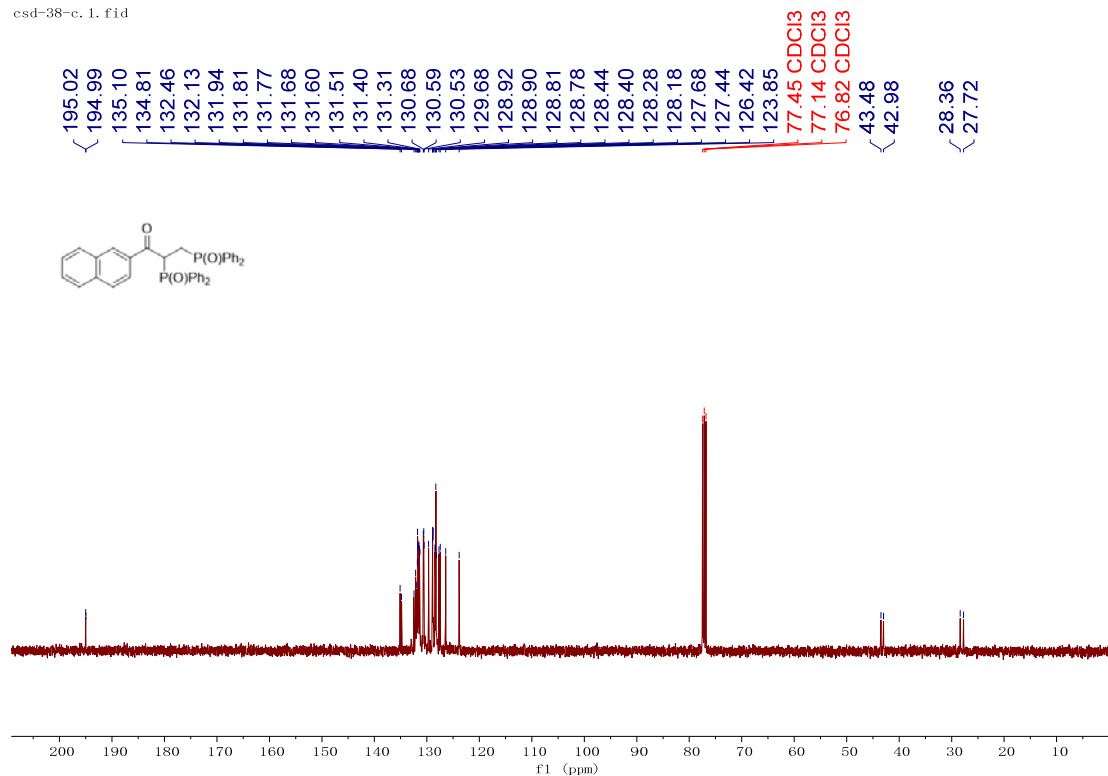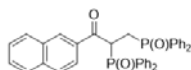

<sup>13</sup>C NMR spectrum of **4k** (100 MHz, CDCl<sub>3</sub>)

cds-38.2.fid

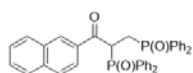

31.6897  
31.4305  
31.0897  
30.8303

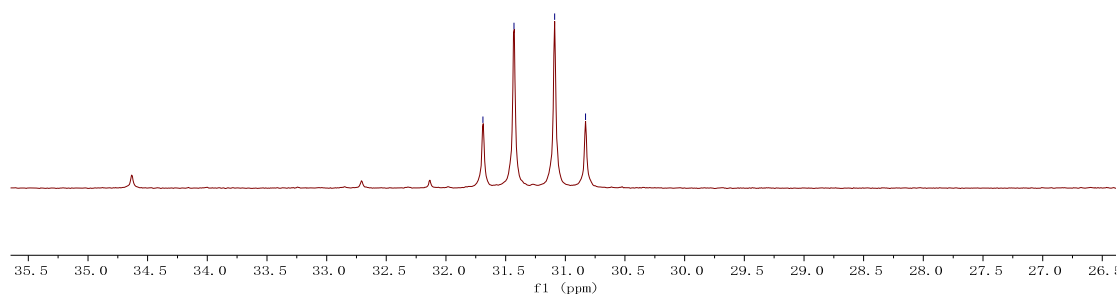

<sup>31</sup>P NMR spectrum of **4k** (162 MHz, CDCl<sub>3</sub>)

cds-37.1.fid

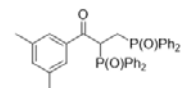

7.8374  
7.8150  
7.6946  
7.6730  
7.6444  
7.6120  
7.5926  
7.5634  
7.5090  
7.4904  
7.4332  
7.2853  
7.2740  
7.2575 CDCl<sub>3</sub>  
7.2487  
7.2218  
7.2000  
6.9307  
6.8947  
6.8835  
5.1646  
5.1363  
5.1086  
3.5785  
3.5668  
3.5400  
3.5161  
3.5001  
2.8387  
2.8064  
2.7712  
2.7378  
2.1344  
-0.0000

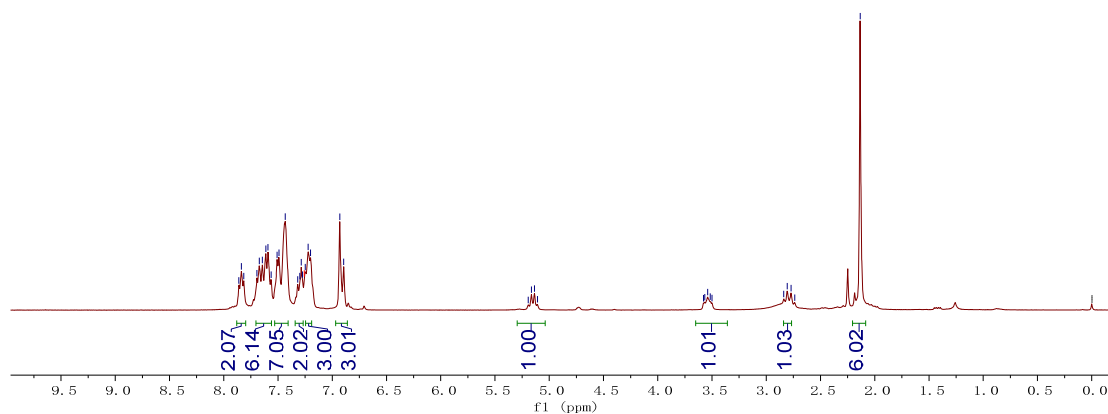

<sup>1</sup>H NMR spectrum of **4l** (400 MHz, CDCl<sub>3</sub>)

csd-37-c. 1. fid

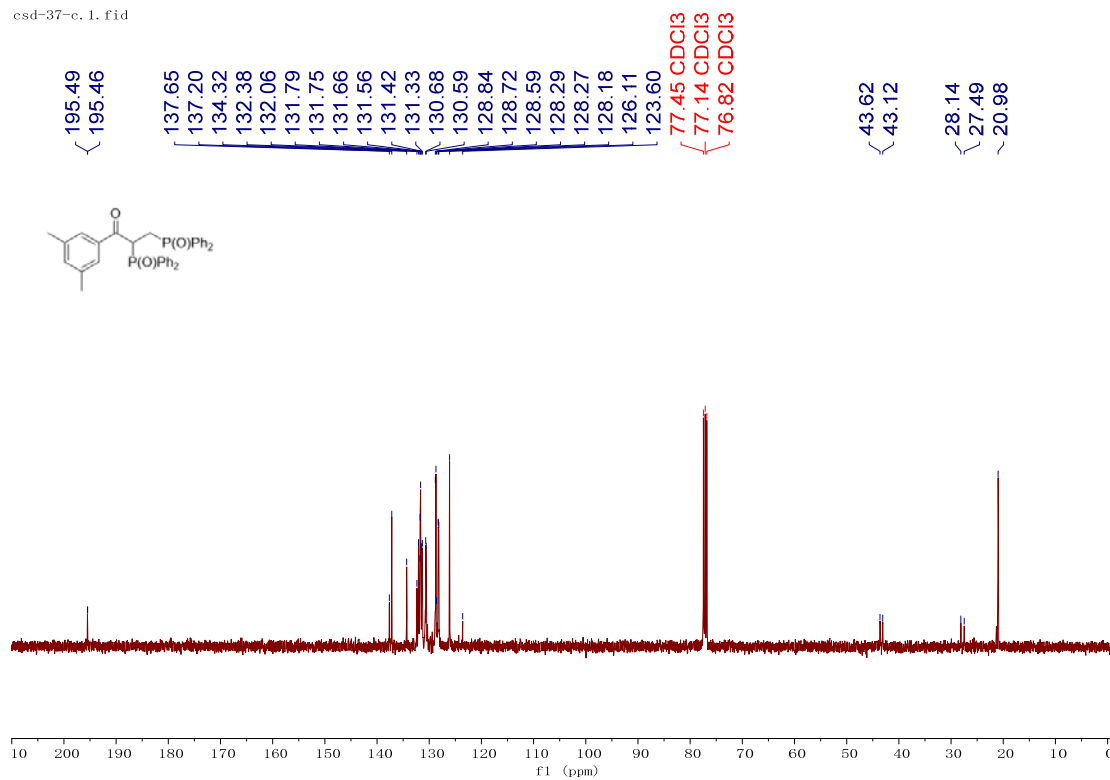

<sup>13</sup>C NMR spectrum of **4I** (100 MHz, CDCl<sub>3</sub>)

cds-37.2. fid

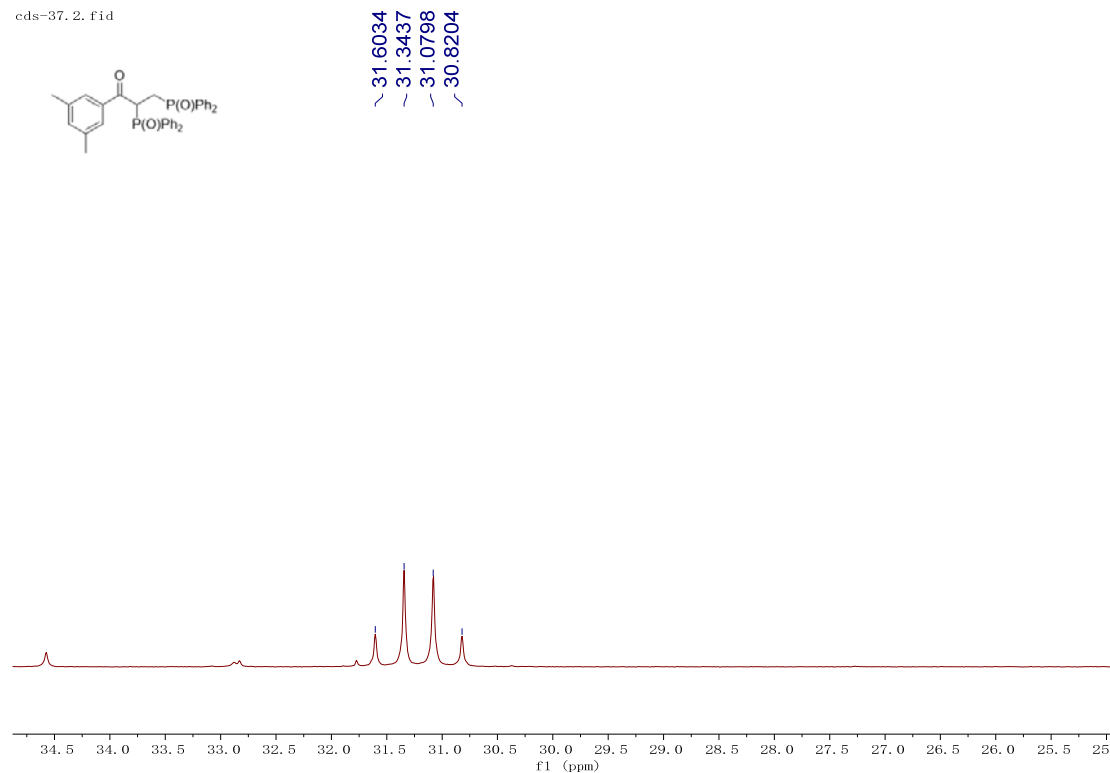

<sup>31</sup>P NMR spectrum of **4I** (162 MHz, CDCl<sub>3</sub>)

cds-40.1.fid

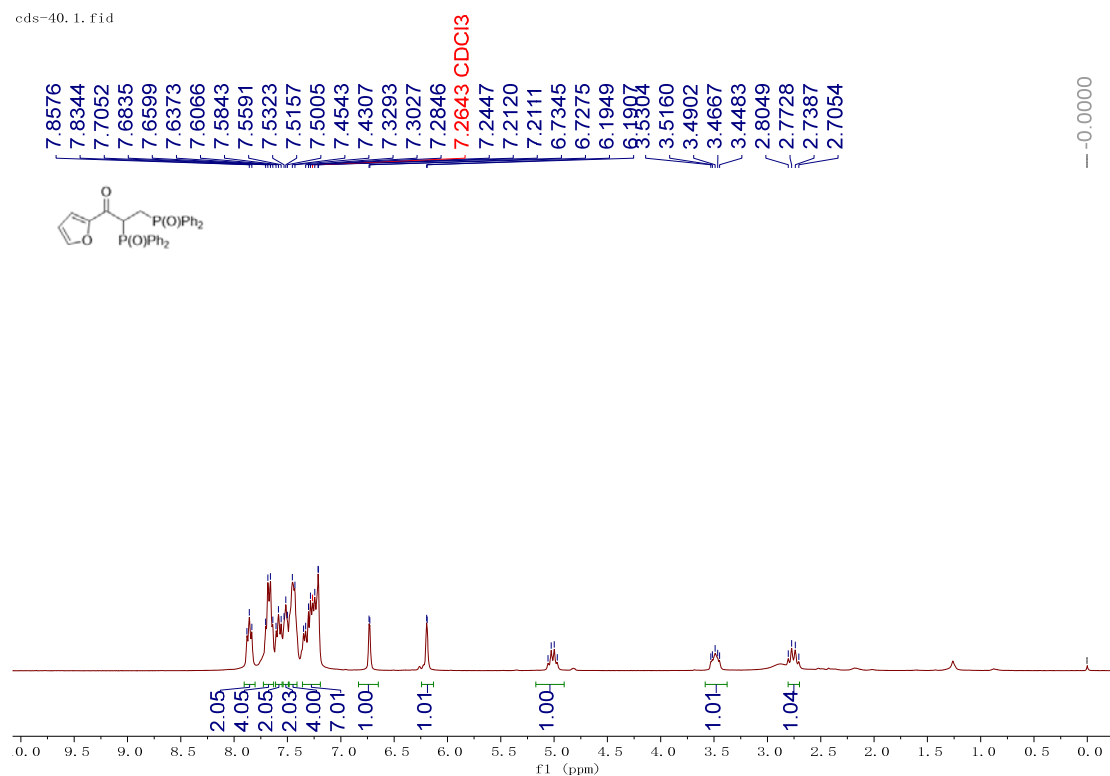

<sup>1</sup>H NMR spectrum of **4m** (400 MHz, CDCl<sub>3</sub>)

cds-40-c.1.fid

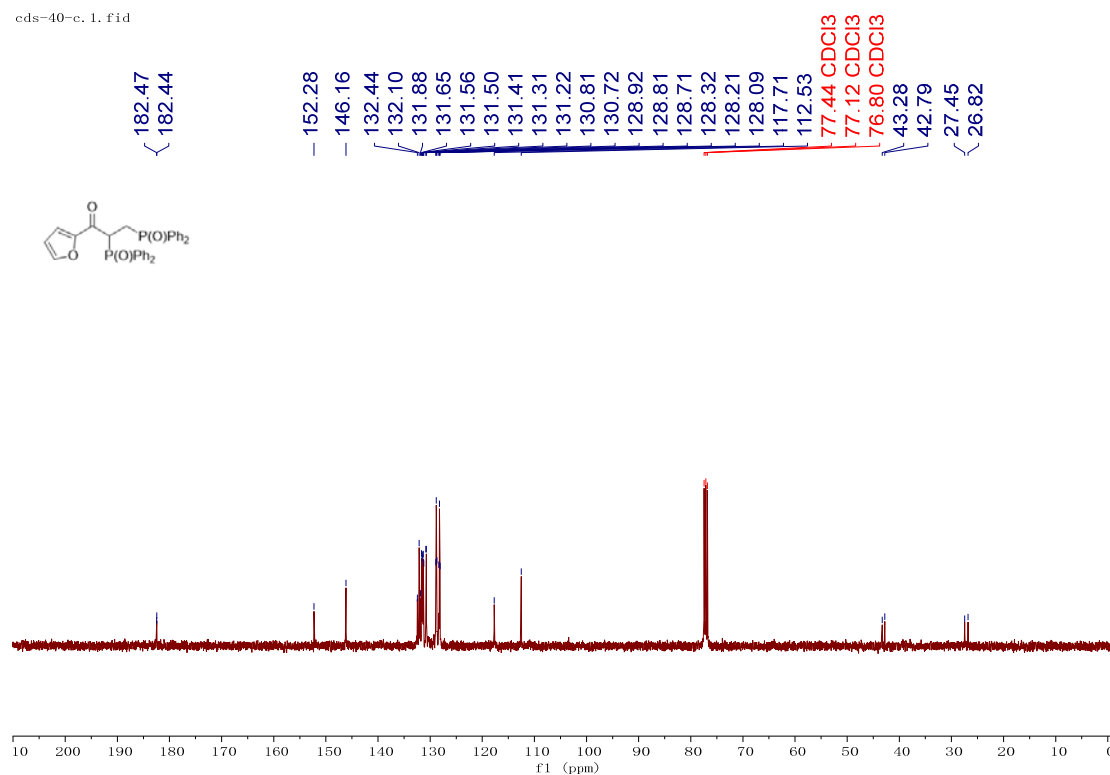

<sup>13</sup>C NMR spectrum of **4m** (100 MHz, CDCl<sub>3</sub>)



cds-40.2.fid

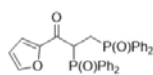

31.4212  
31.1635  
30.8601  
30.6025

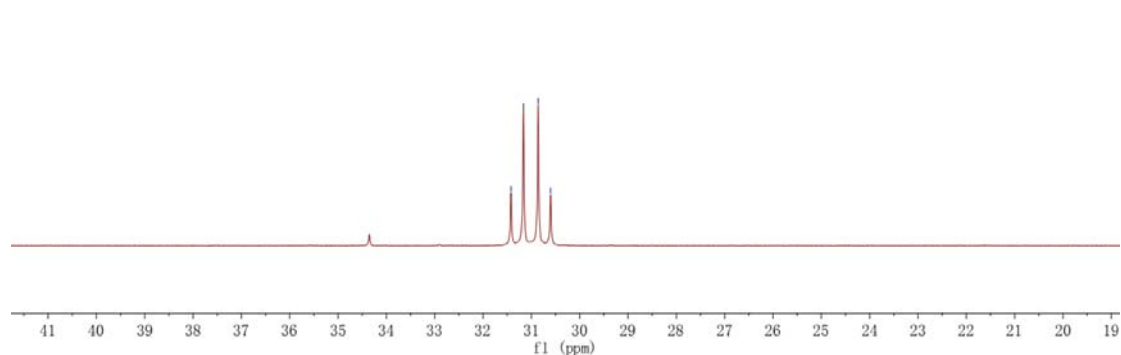

$^{31}\text{P}$  NMR spectrum of **4m** (162 MHz,  $\text{CDCl}_3$ )

cds-63.1.fid

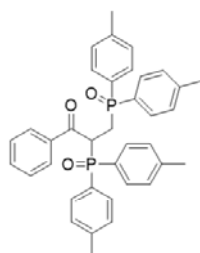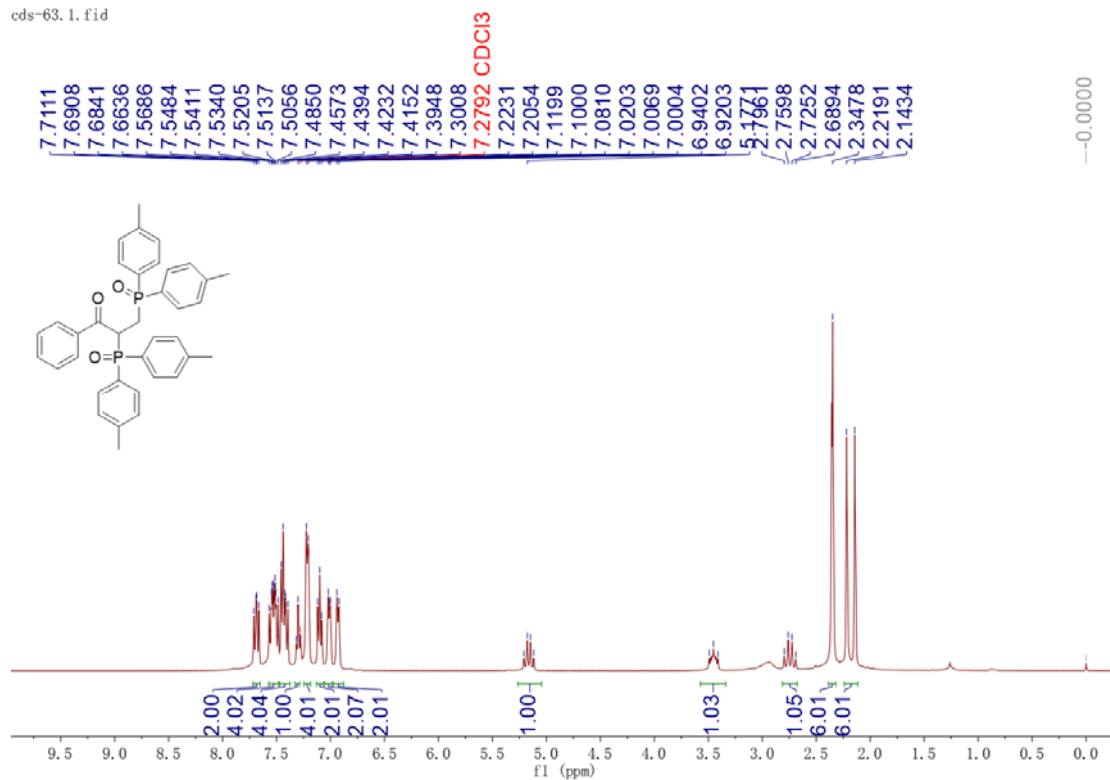

$^1\text{H}$  NMR spectrum of **4n** (400 MHz,  $\text{CDCl}_3$ )

cds-63-c. 1. fid

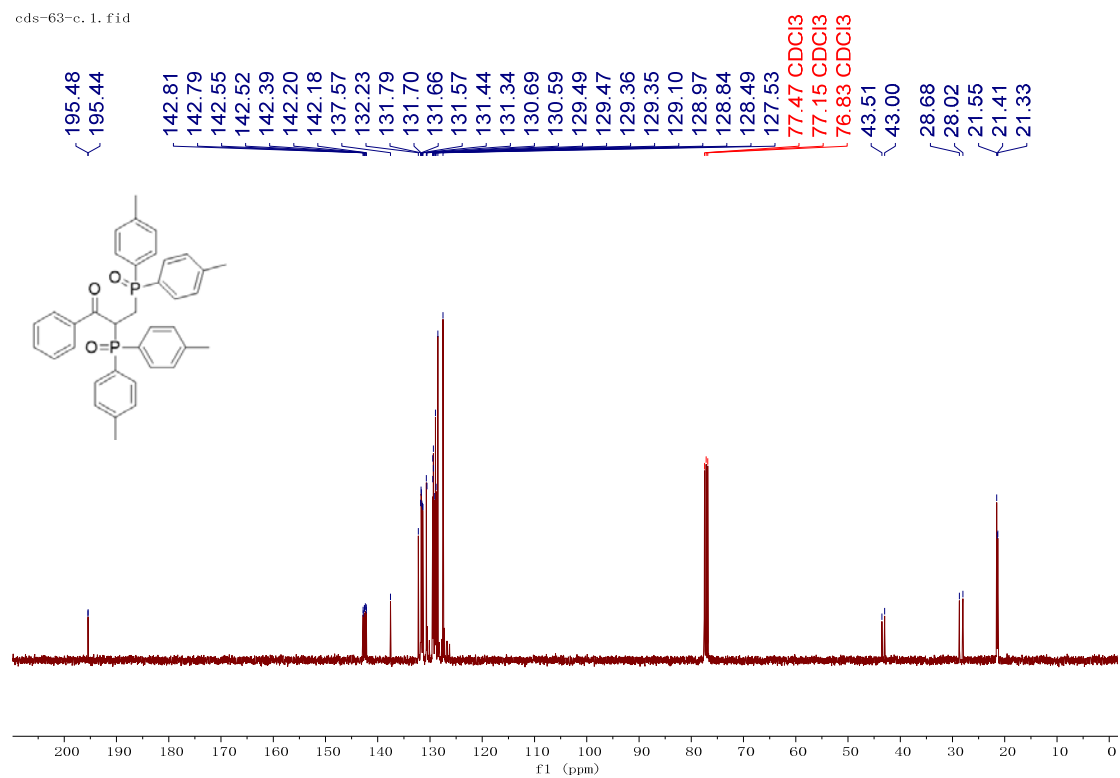

<sup>13</sup>C NMR spectrum of **4n** (100 MHz, CDCl<sub>3</sub>)

cds-63.2. fid

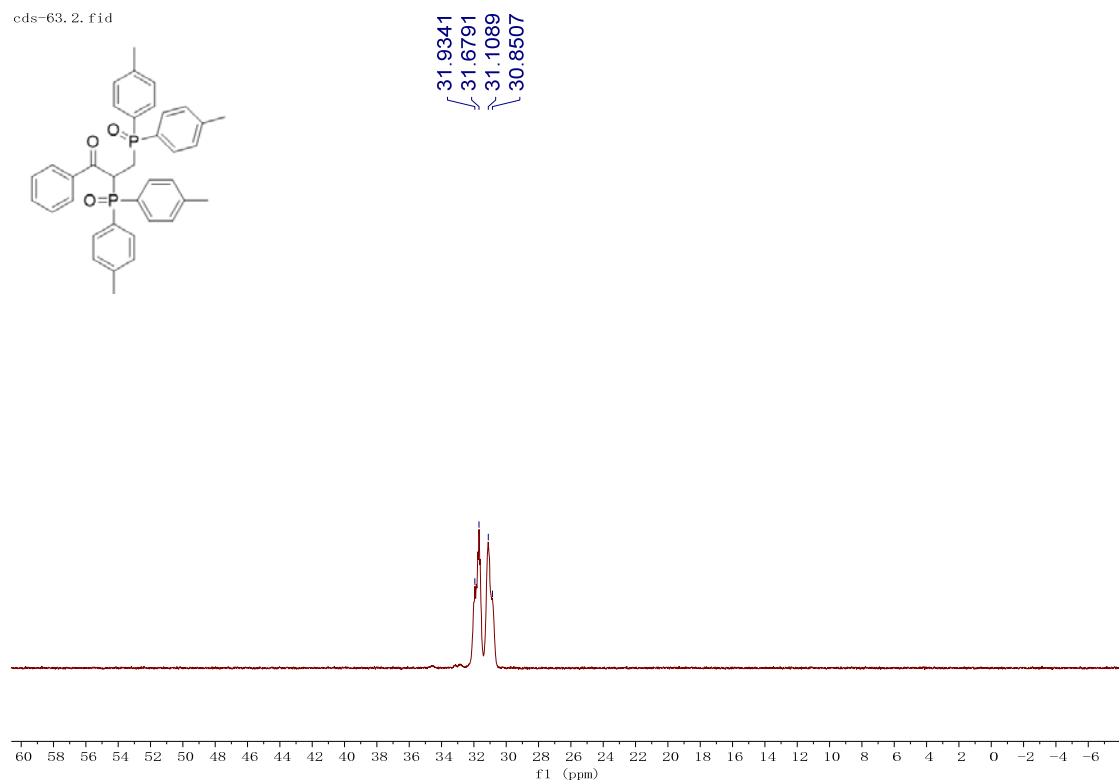

<sup>31</sup>P NMR spectrum of **4n** (162 MHz, CDCl<sub>3</sub>)

cds-65.1.1.fid

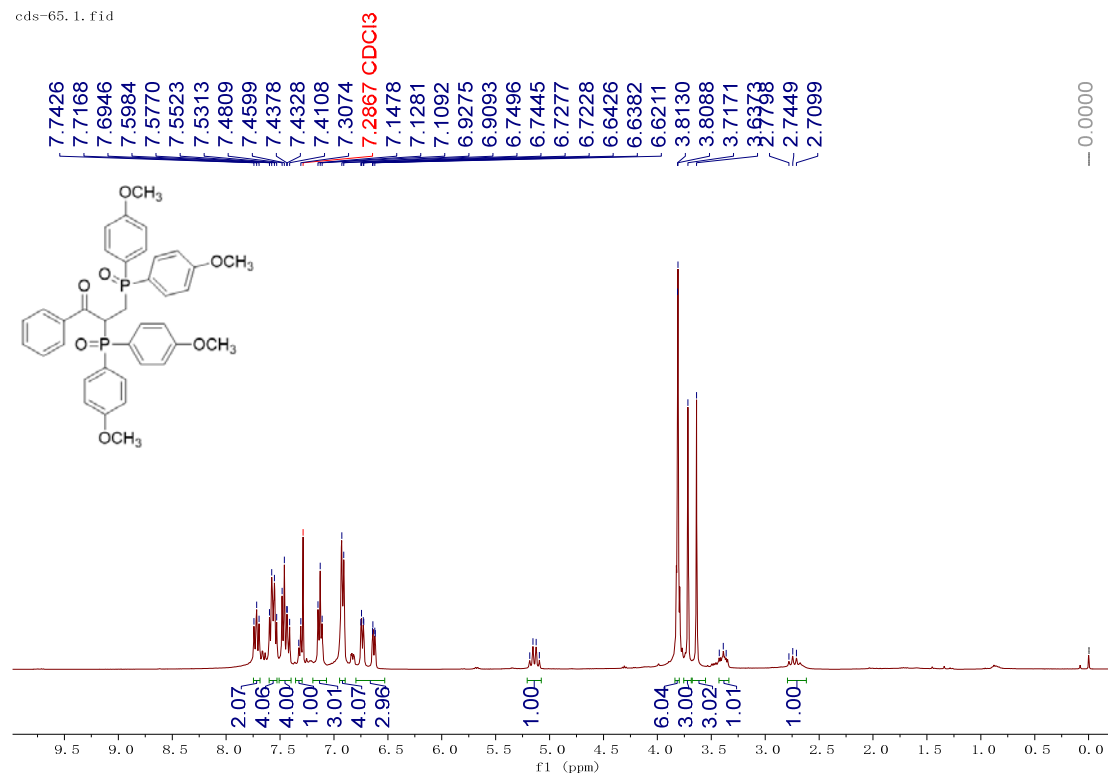

<sup>1</sup>H NMR spectrum of **4o** (400 MHz, CDCl<sub>3</sub>)

cds-65-c.1.fid

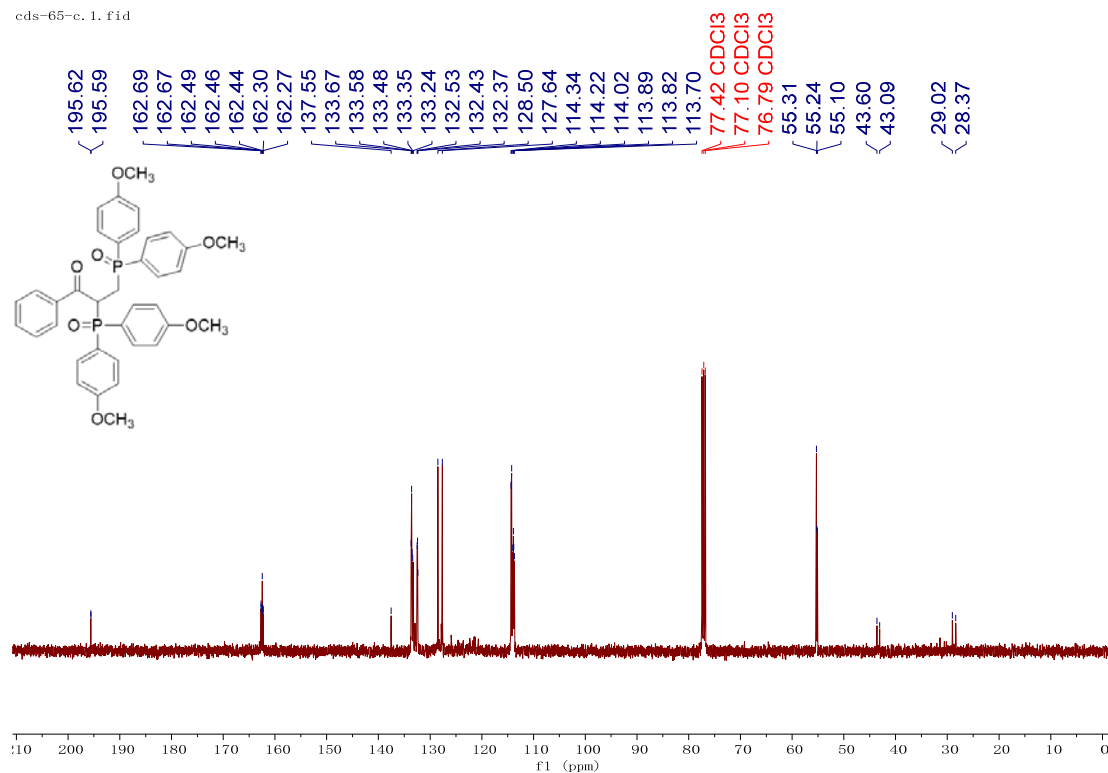

<sup>13</sup>C NMR spectrum of **4o** (100 MHz, CDCl<sub>3</sub>)

cds-65.2.fid

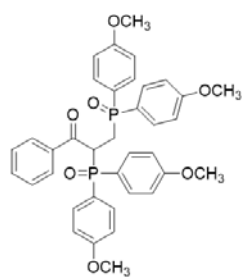

31.7008  
31.4433  
31.0331  
30.7747

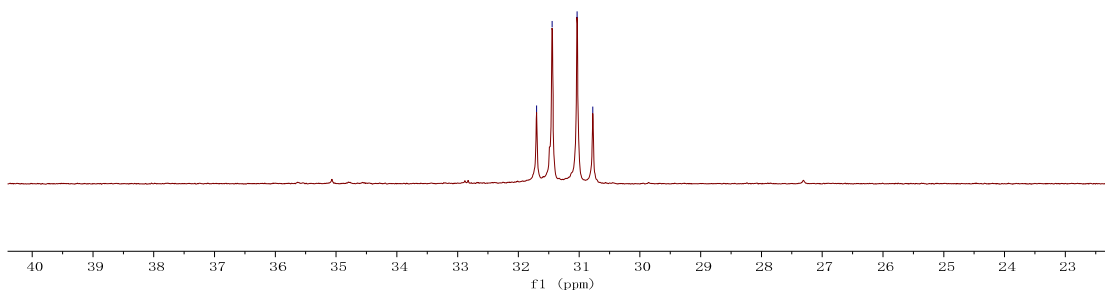

<sup>31</sup>P NMR spectrum of **4o** (162 MHz, CDCl<sub>3</sub>)

CDS-64.1.fid

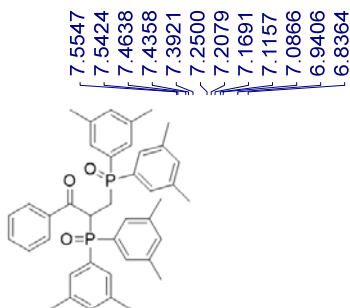

7.5547  
7.5424  
7.4638  
7.4358  
7.3921  
7.2500  
7.2079  
7.1691  
7.1157  
7.0866  
6.9406  
6.8364

5.1162  
5.0911

3.3635  
3.3341  
2.6226  
2.5899  
2.5579  
2.5027 DMSO  
2.2455  
2.1111  
2.0329

-0.0000

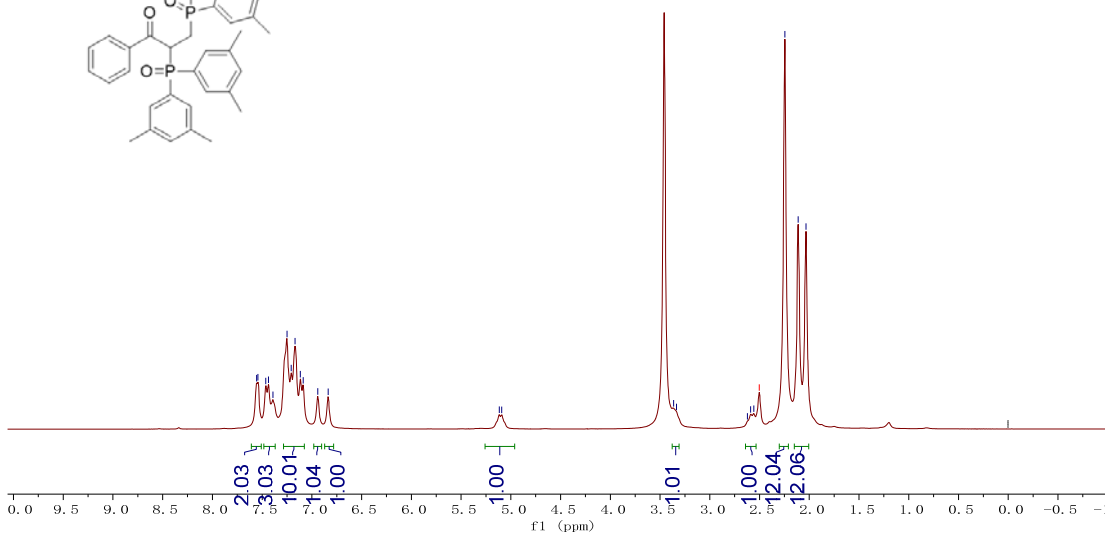

<sup>1</sup>H NMR spectrum of **4p** (400 MHz, DMSO-*d*<sub>6</sub>)

cds-64-1-c. 1. f1d

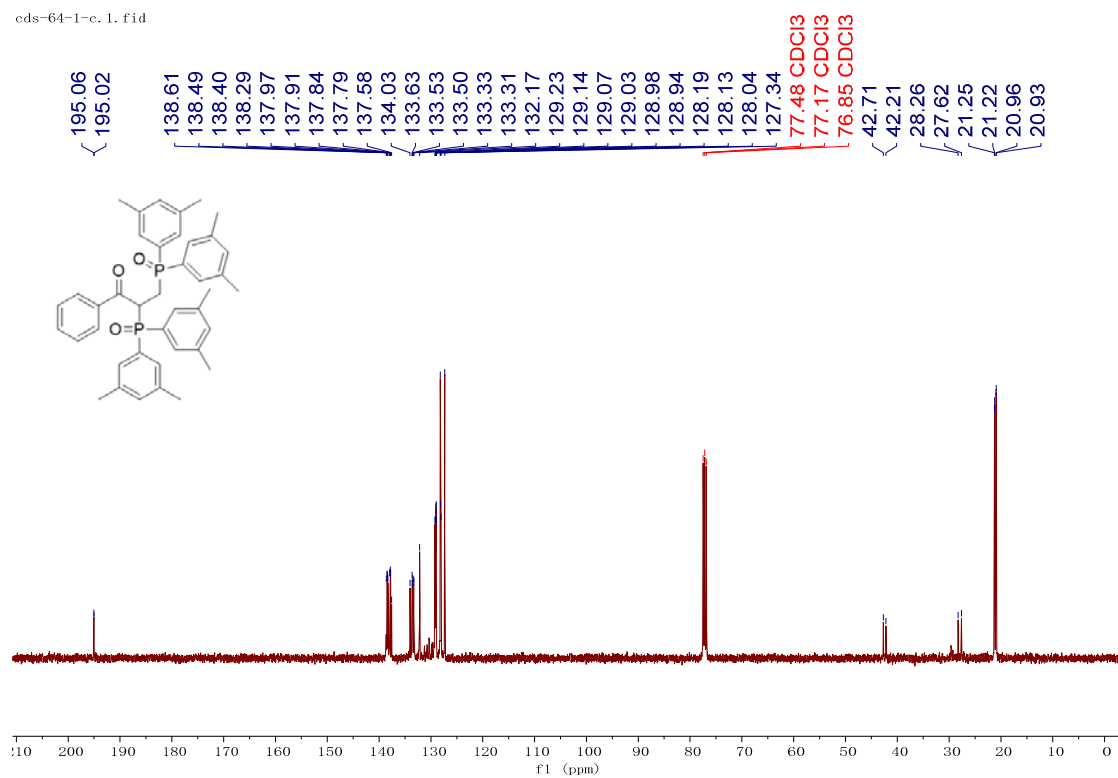

<sup>13</sup>C NMR spectrum of **4p** (100 MHz, CDCl<sub>3</sub>)

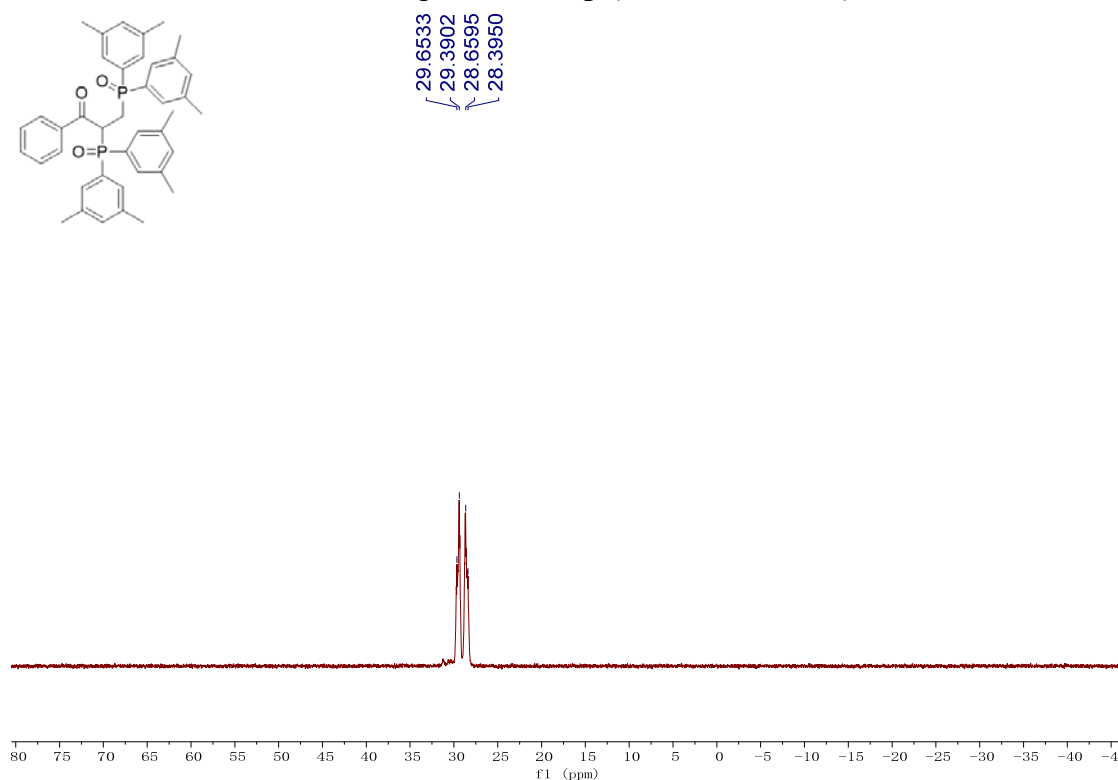

<sup>31</sup>P NMR spectrum of **4p** (162 MHz, DMSO-*d*<sub>6</sub>)

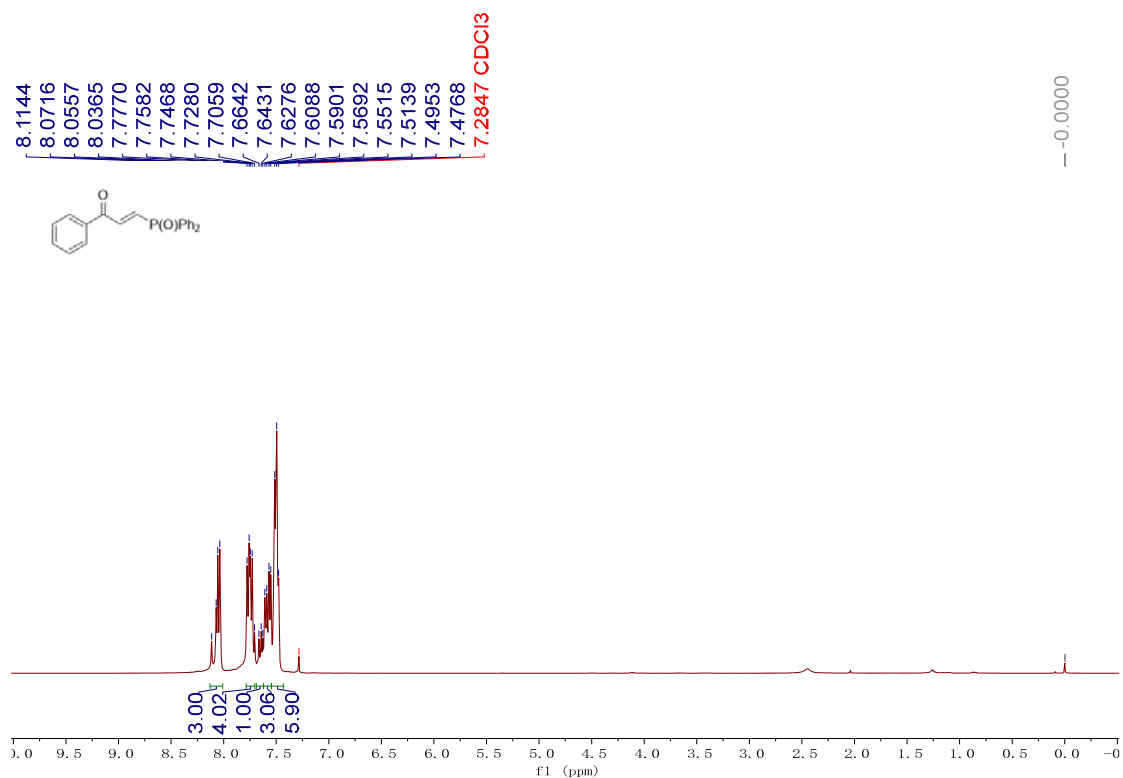

<sup>1</sup>H NMR spectrum of **5a** (400 MHz, CDCl<sub>3</sub>)

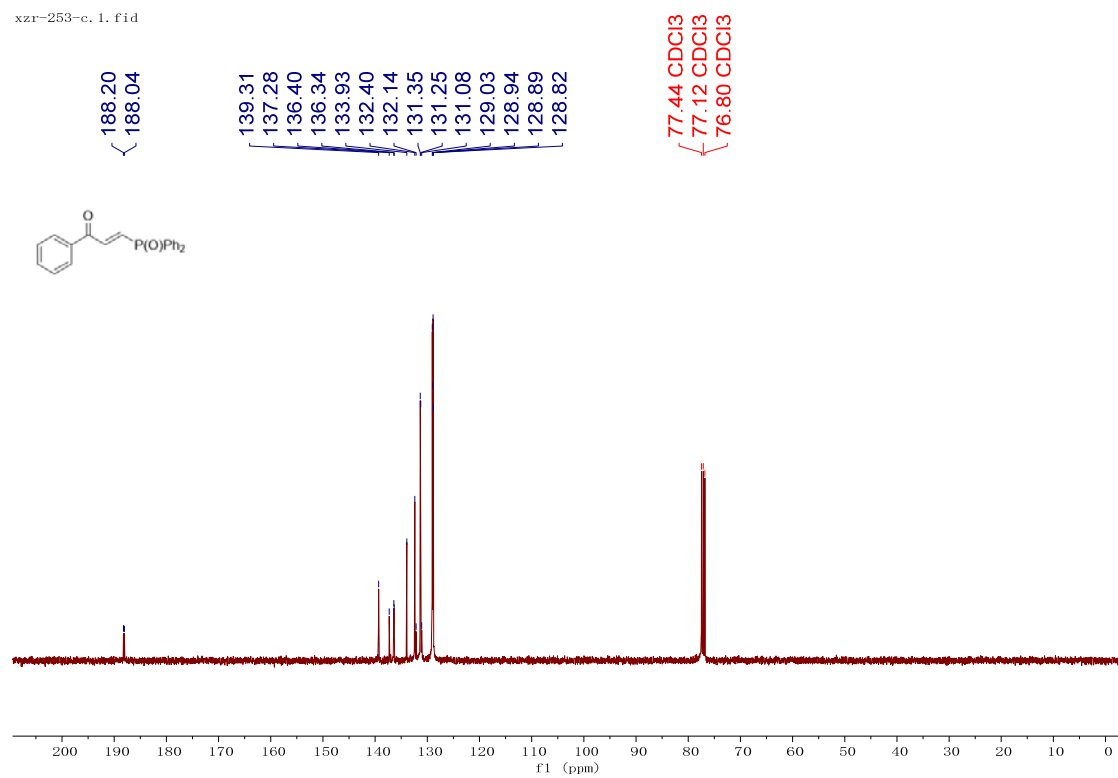

<sup>13</sup>C NMR spectrum of **5a** (100 MHz, CDCl<sub>3</sub>)

cds-49.2.fid

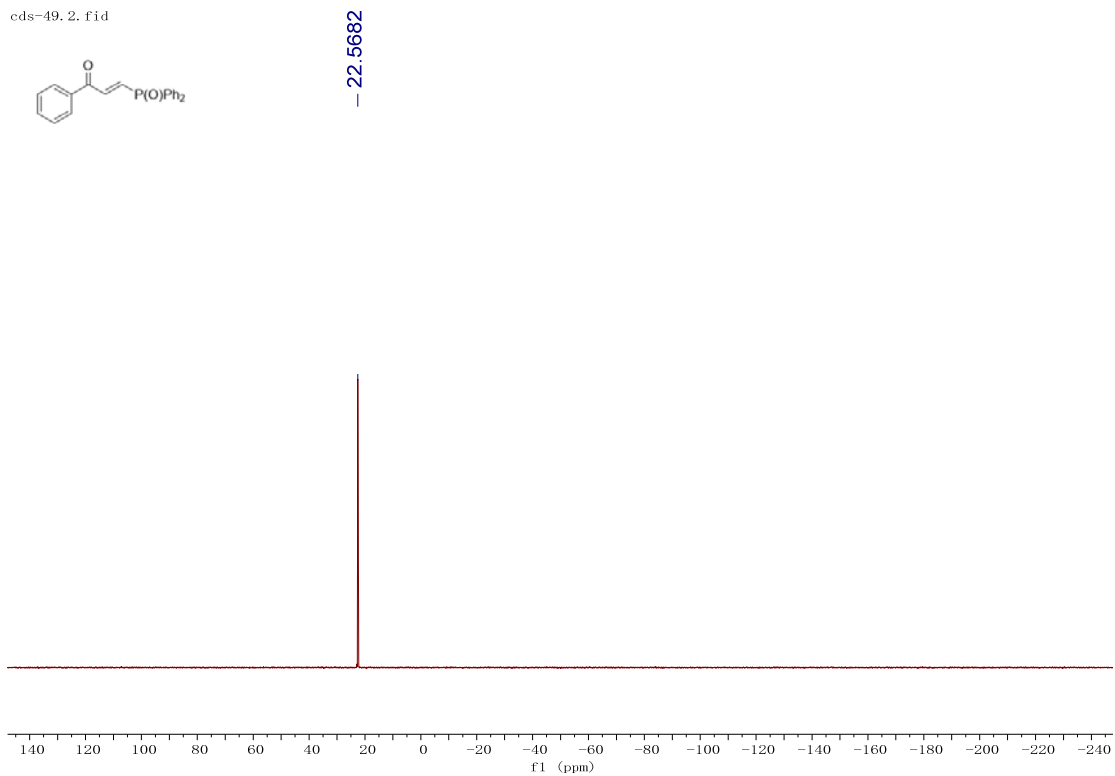

<sup>31</sup>P NMR spectrum of **5a** (162 MHz, CDCl<sub>3</sub>)

cds-66.1.fid

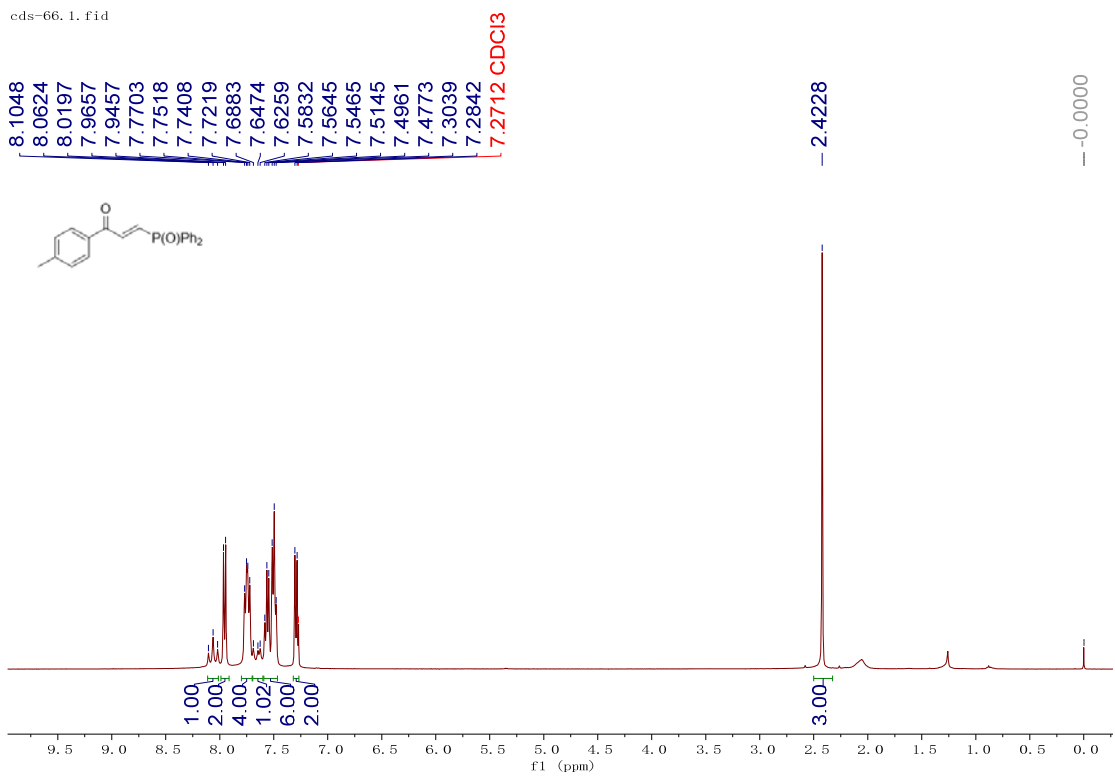

<sup>1</sup>H NMR spectrum of **5b** (400 MHz, CDCl<sub>3</sub>)

cds-66-c. 1. fid

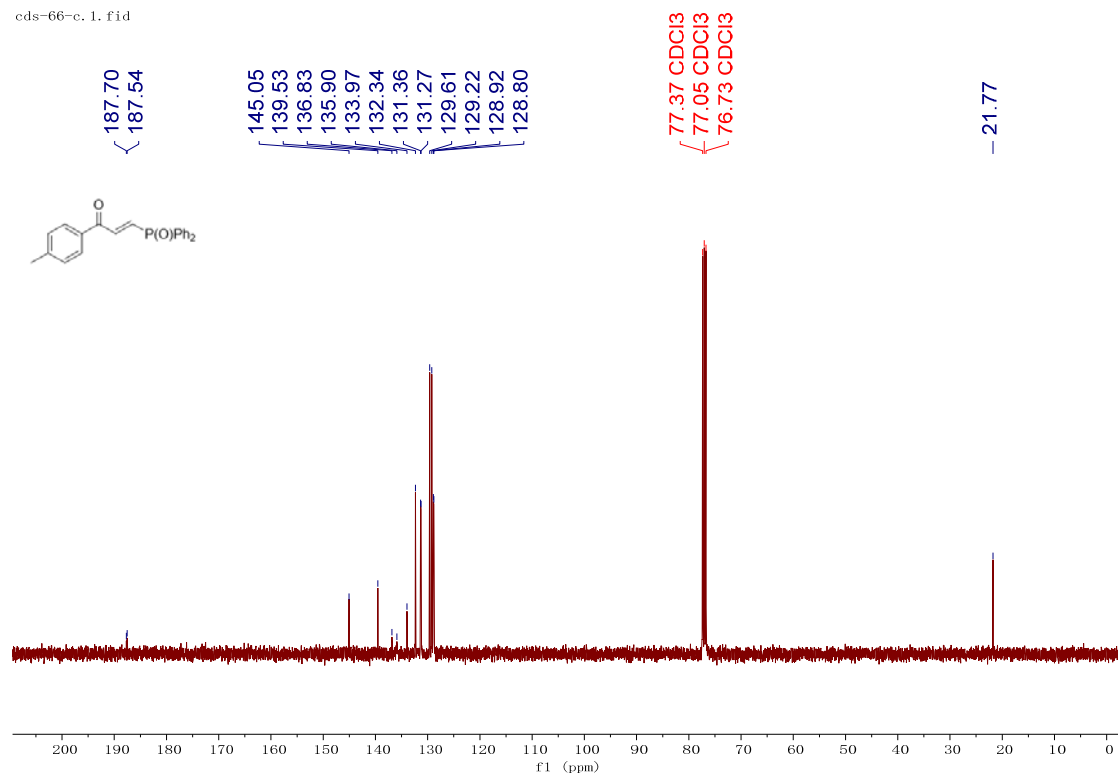

<sup>13</sup>C NMR spectrum of **5b** (100 MHz, CDCl<sub>3</sub>)

cds-66.2. fid

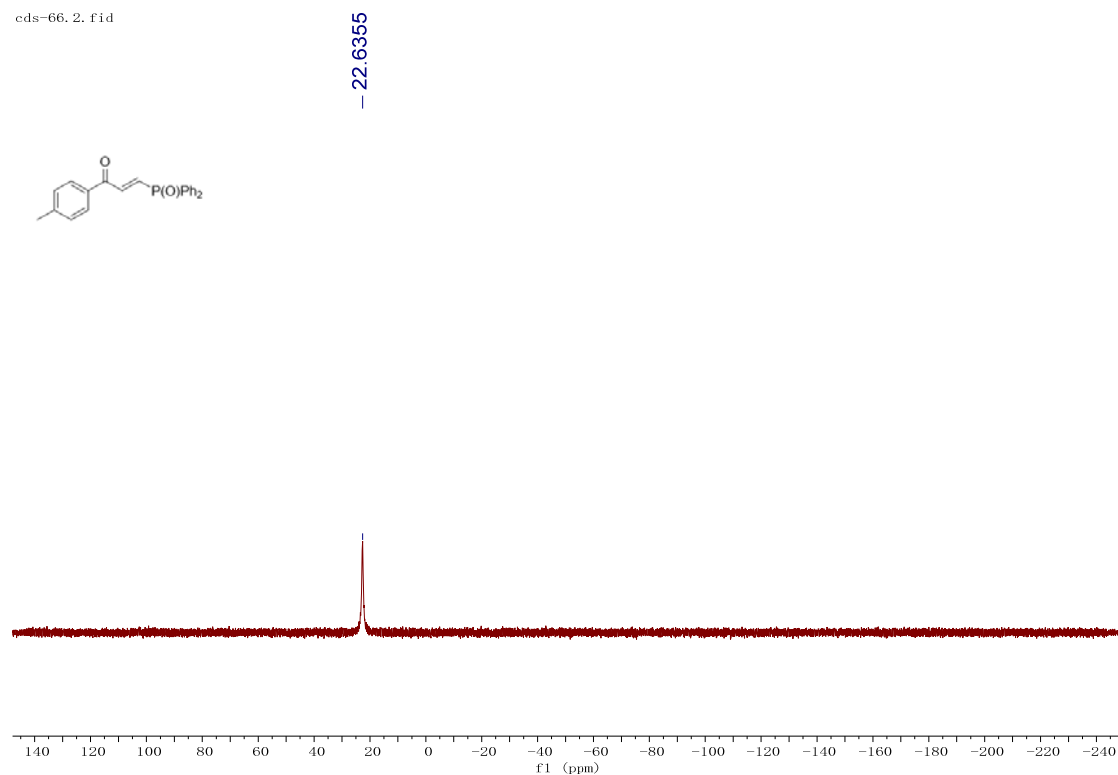

<sup>31</sup>P NMR spectrum of **5b** (162 MHz, CDCl<sub>3</sub>)



cds-75.1.fid

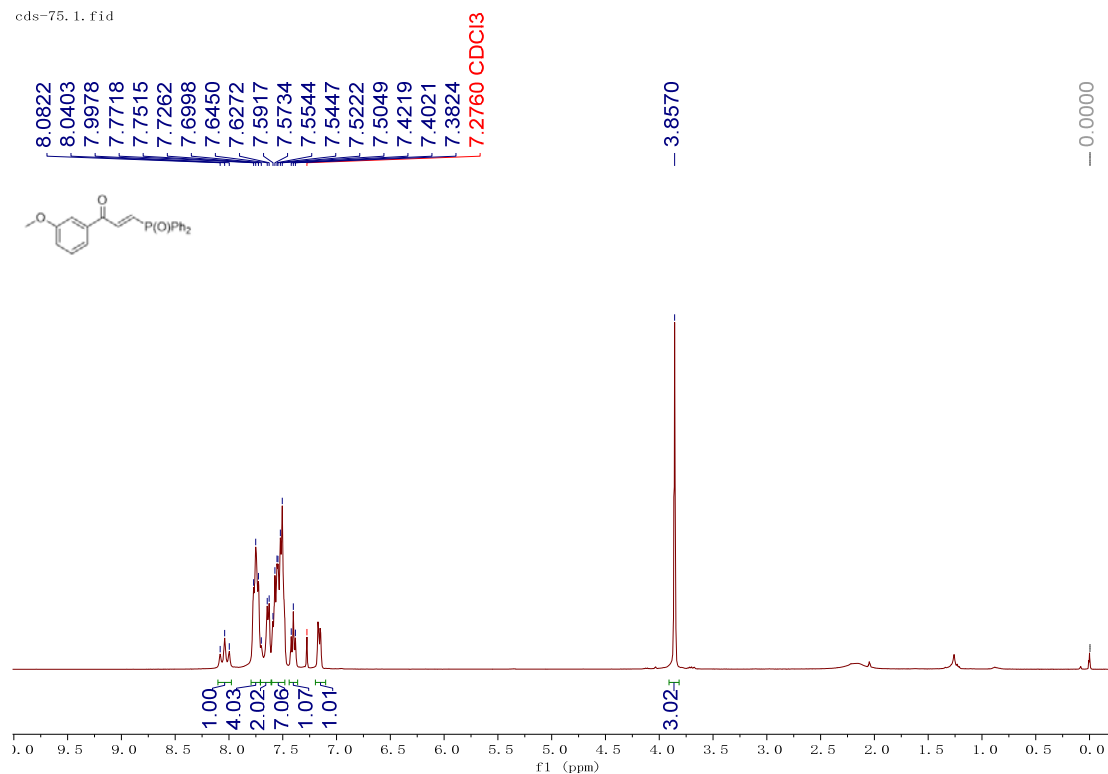

<sup>1</sup>H NMR spectrum of 5c (400 MHz, CDCl<sub>3</sub>)

cds-75-c.1.fid

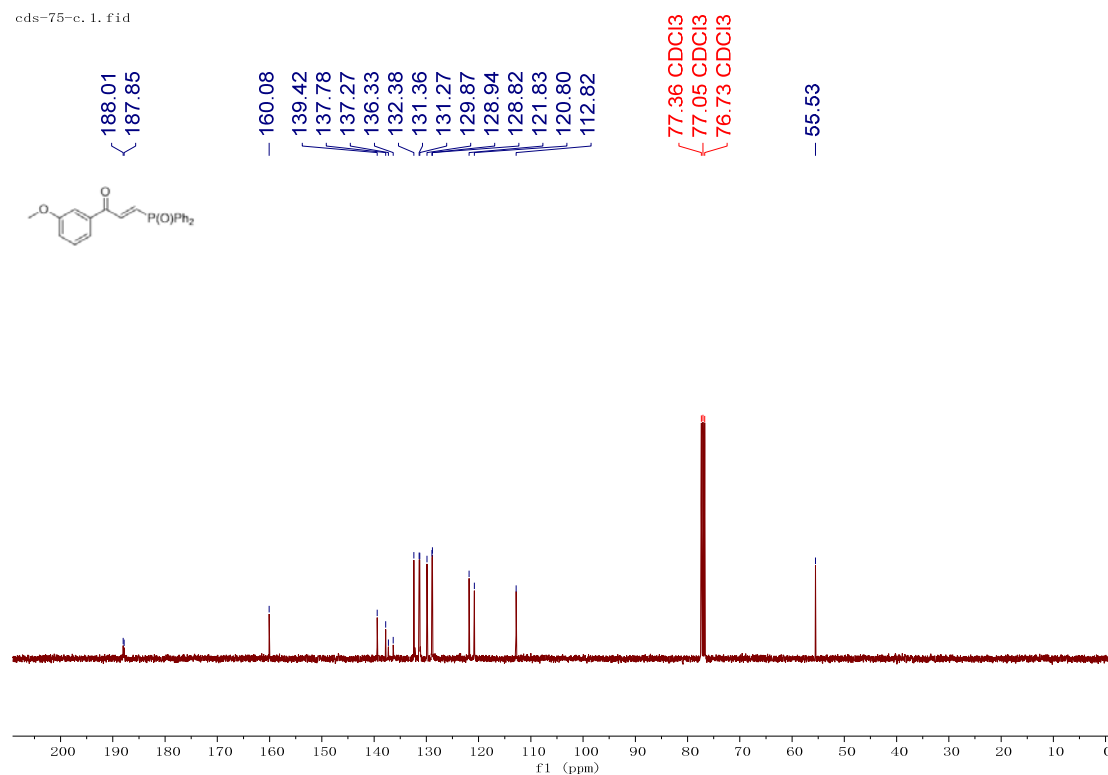

<sup>13</sup>C NMR spectrum of 5c (100 MHz, CDCl<sub>3</sub>)

cds-75.2.fid

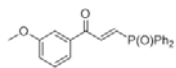

-22.7194

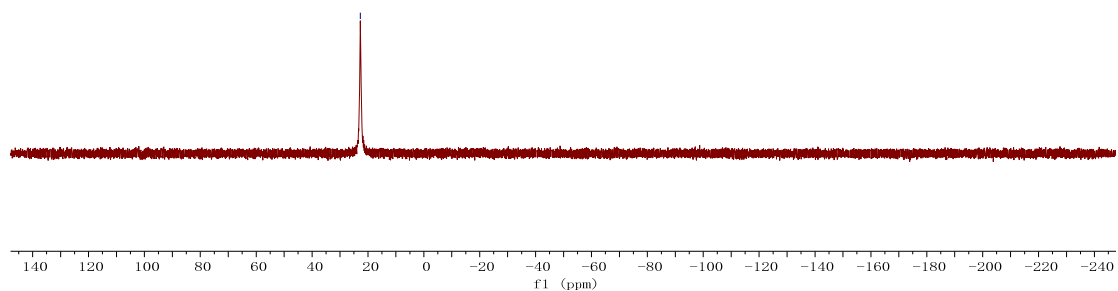

31P NMR spectrum of 5c (162 MHz, CDCl<sub>3</sub>)

cds-71.1.fid

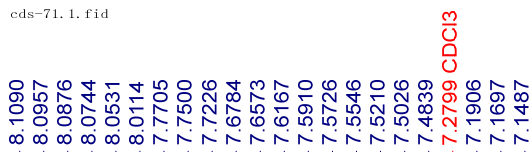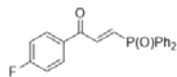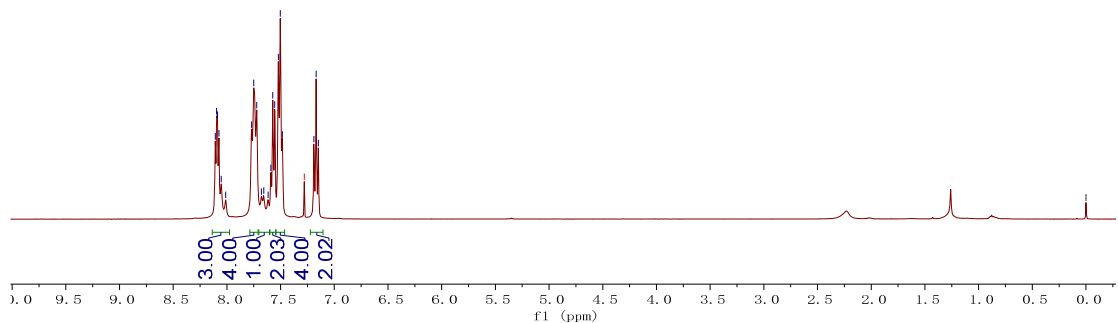

1H NMR spectrum of 5d (400 MHz, CDCl<sub>3</sub>)

cds-71-c. 1. fid

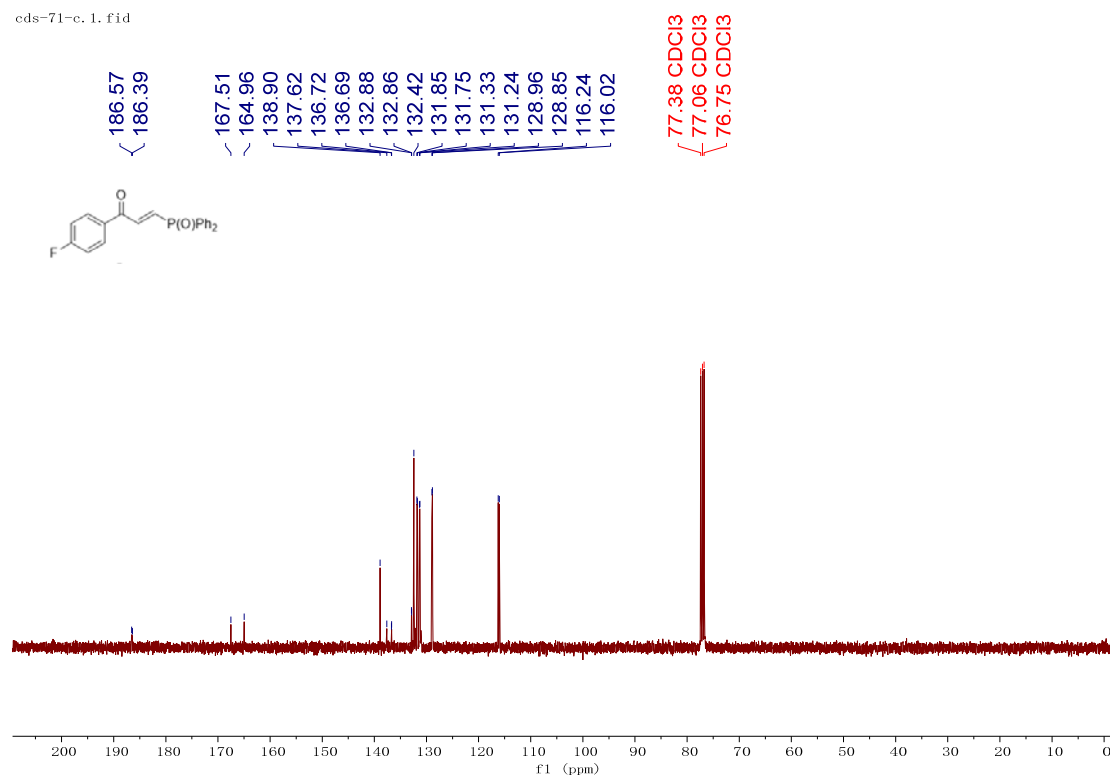

$^{13}\text{C}$  NMR spectrum of **5d** (100 MHz,  $\text{CDCl}_3$ )

cds-71. 2. fid

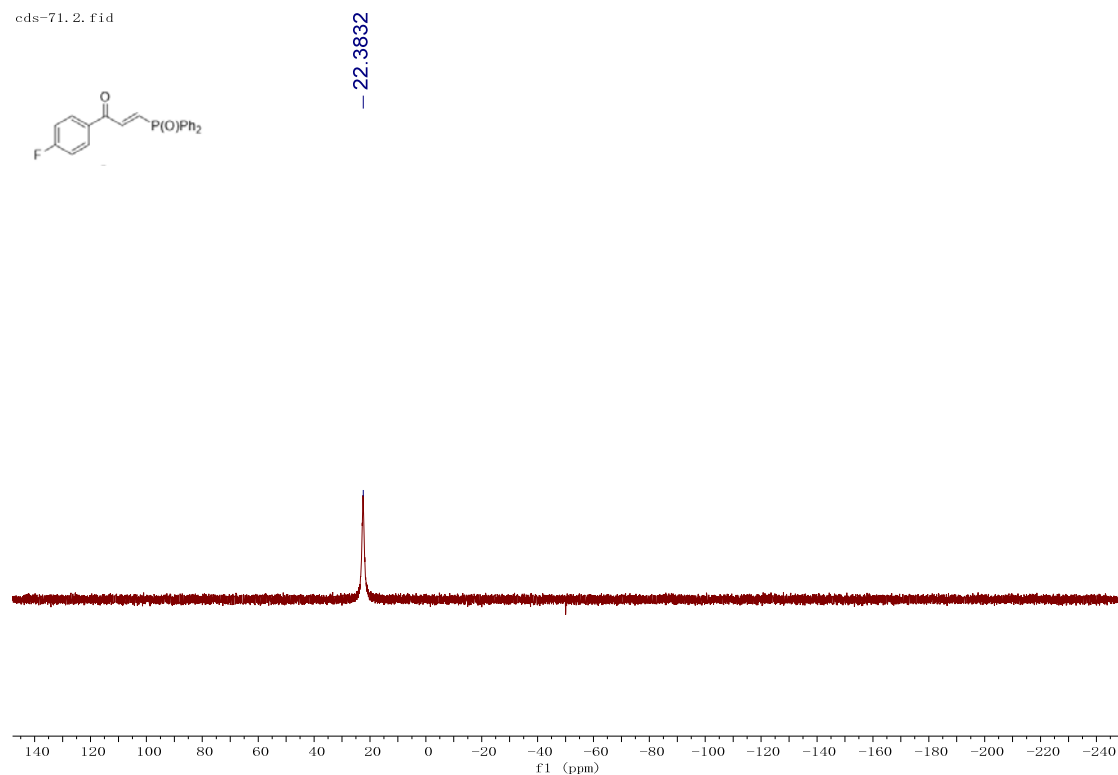

$^{31}\text{P}$  NMR spectrum of **5d** (162 MHz,  $\text{CDCl}_3$ )

cds-71-f. 1. fid

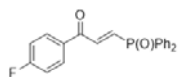

-103.20

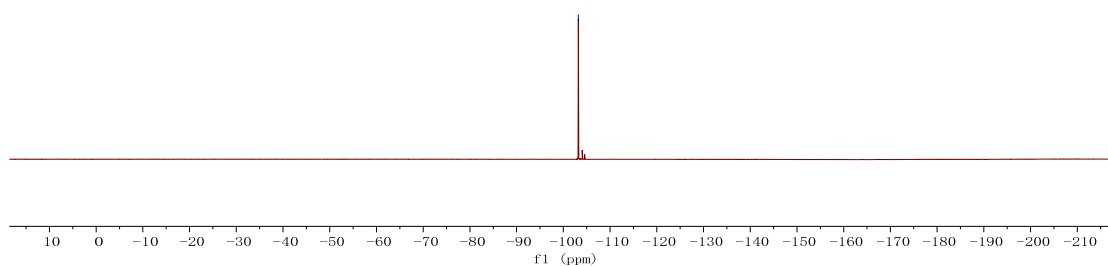

<sup>19</sup>F NMR spectrum of **5d** (376 MHz, CDCl<sub>3</sub>)

cds-70. 1. fid

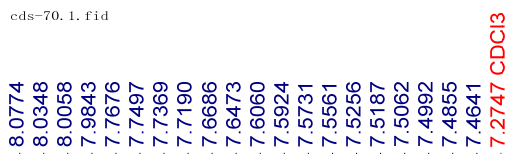

-0.0000

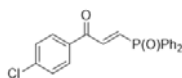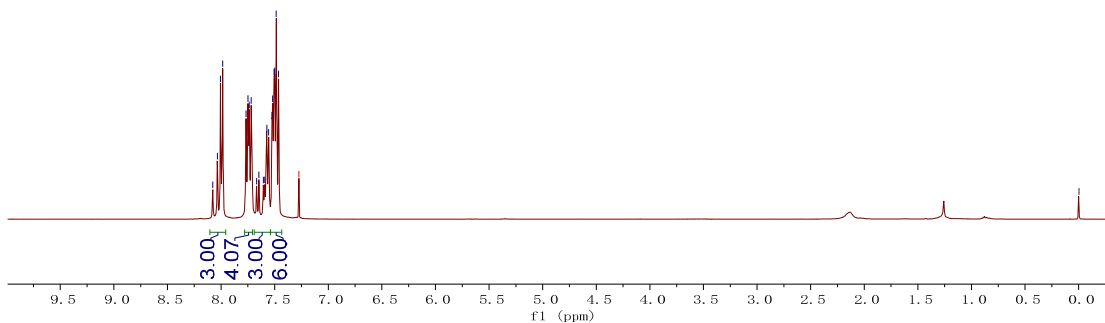

<sup>1</sup>H NMR spectrum of **5e** (400 MHz, CDCl<sub>3</sub>)

cds-70-c. 1. fid

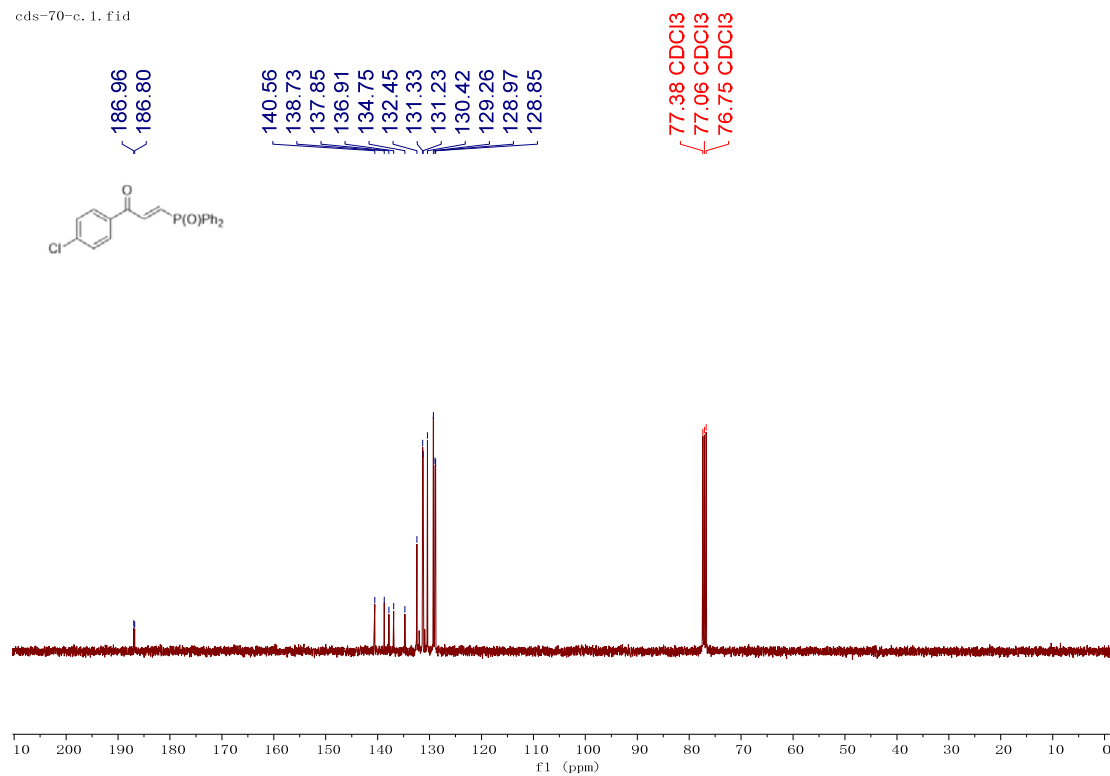

cds-70. 2. fid

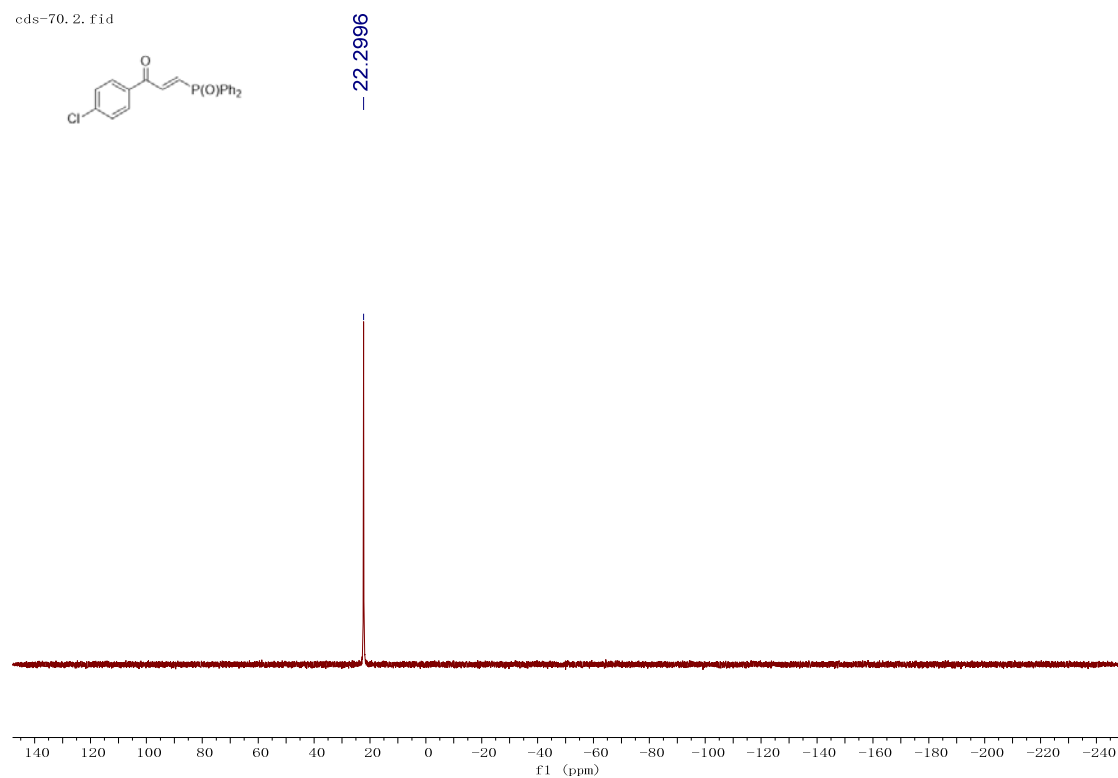

cds-72.1.fid

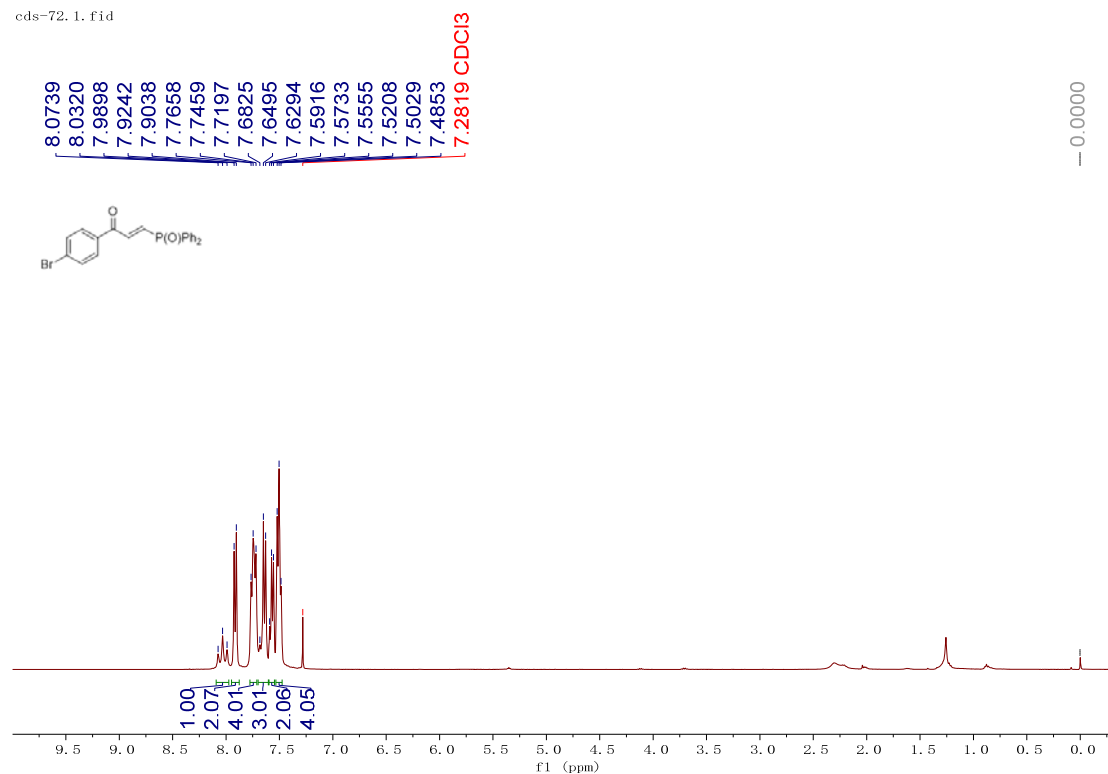

<sup>1</sup>H NMR spectrum of **5f** (400 MHz, CDCl<sub>3</sub>)

cds-72-c.1.fid

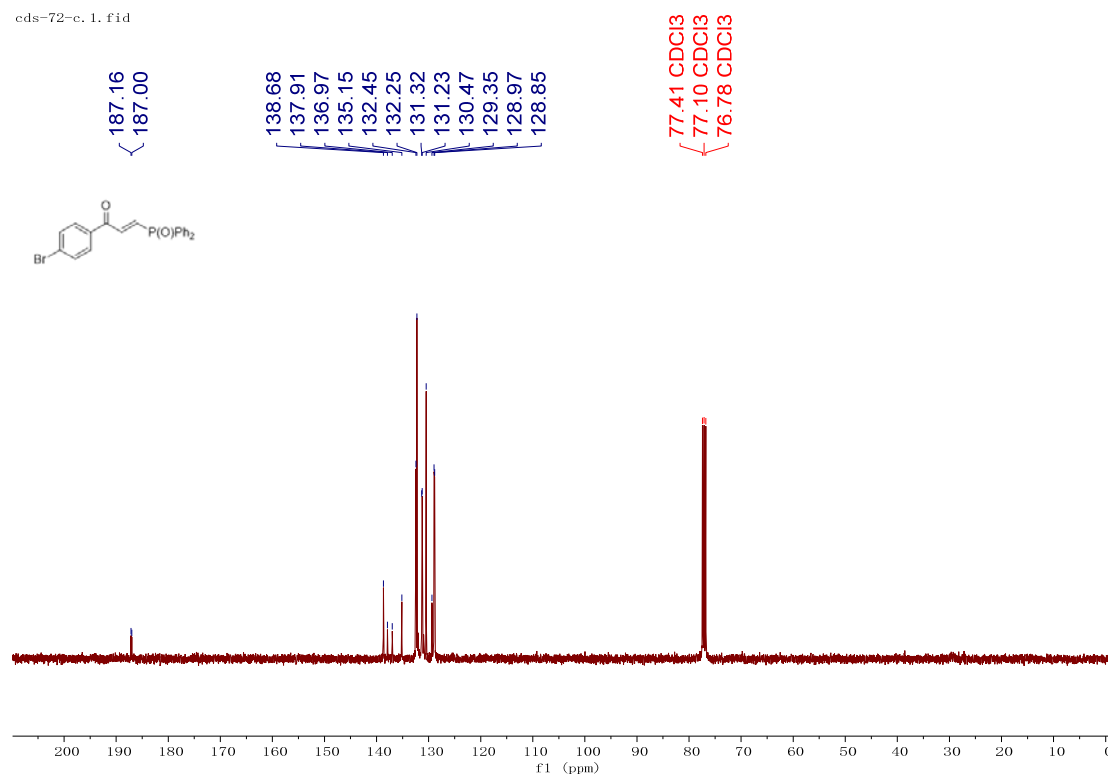

<sup>13</sup>C NMR spectrum of **5f** (100 MHz, CDCl<sub>3</sub>)

cds-72.2.fid

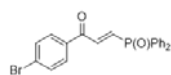

22.4384

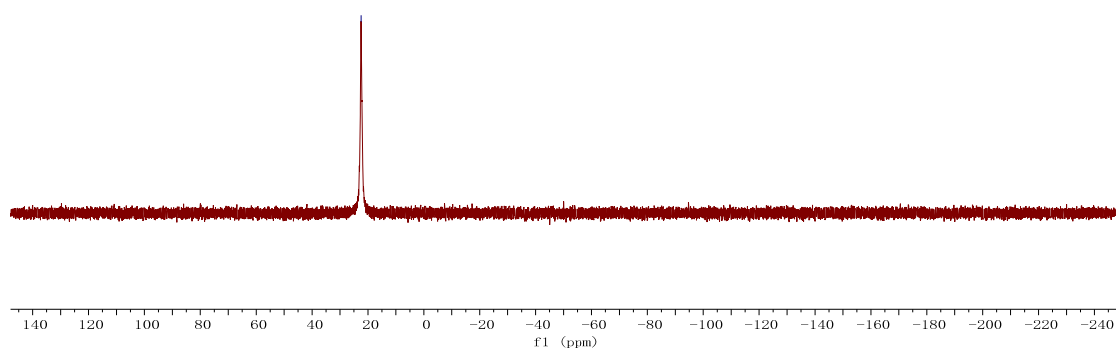

$^{31}\text{P}$  NMR spectrum of **5f** (162 MHz,  $\text{CDCl}_3$ )

cds-73.1.fid

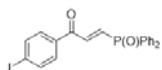

8.0571  
8.0168  
7.9765  
7.8793  
7.8588  
7.7632  
7.7423  
7.5933  
7.5750  
7.5570  
7.5230  
7.5048  
7.4869  
7.2742  $\text{CDCl}_3$

0.0000

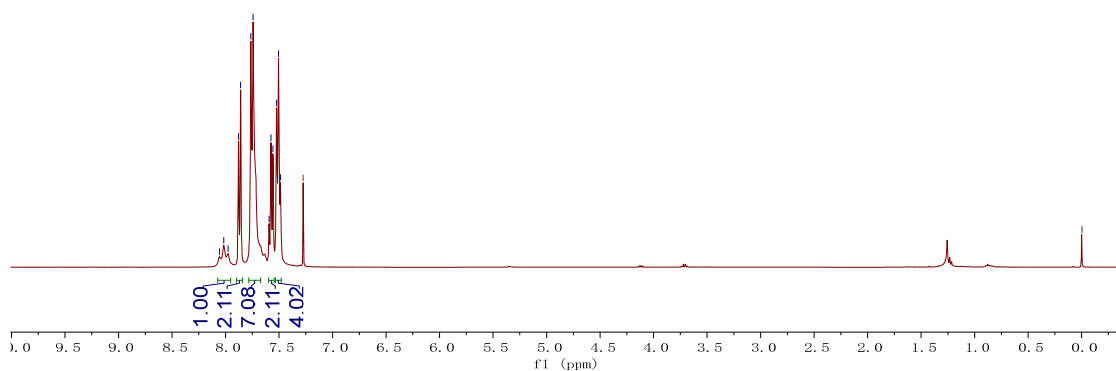

$^1\text{H}$  NMR spectrum of **5g** (400 MHz,  $\text{CDCl}_3$ )

cds-73-c. 1. fid

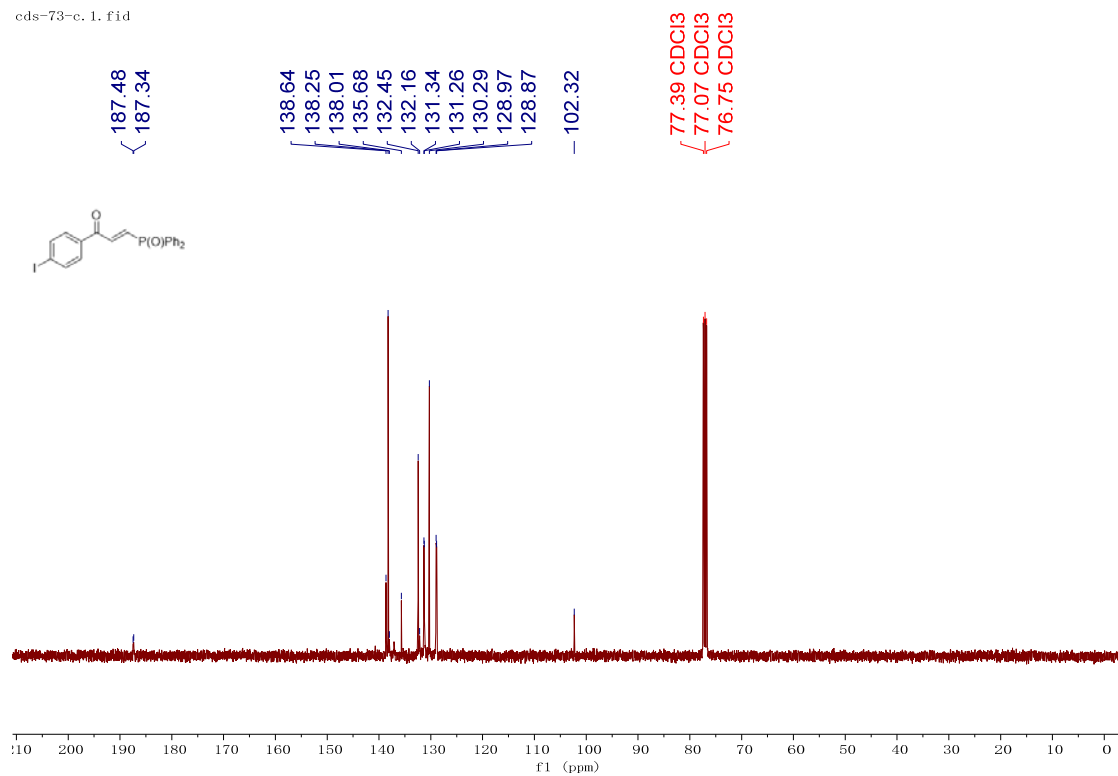

$^{13}\text{C}$  NMR spectrum of **5g** (100 MHz,  $\text{CDCl}_3$ )

cds-73.2. fid

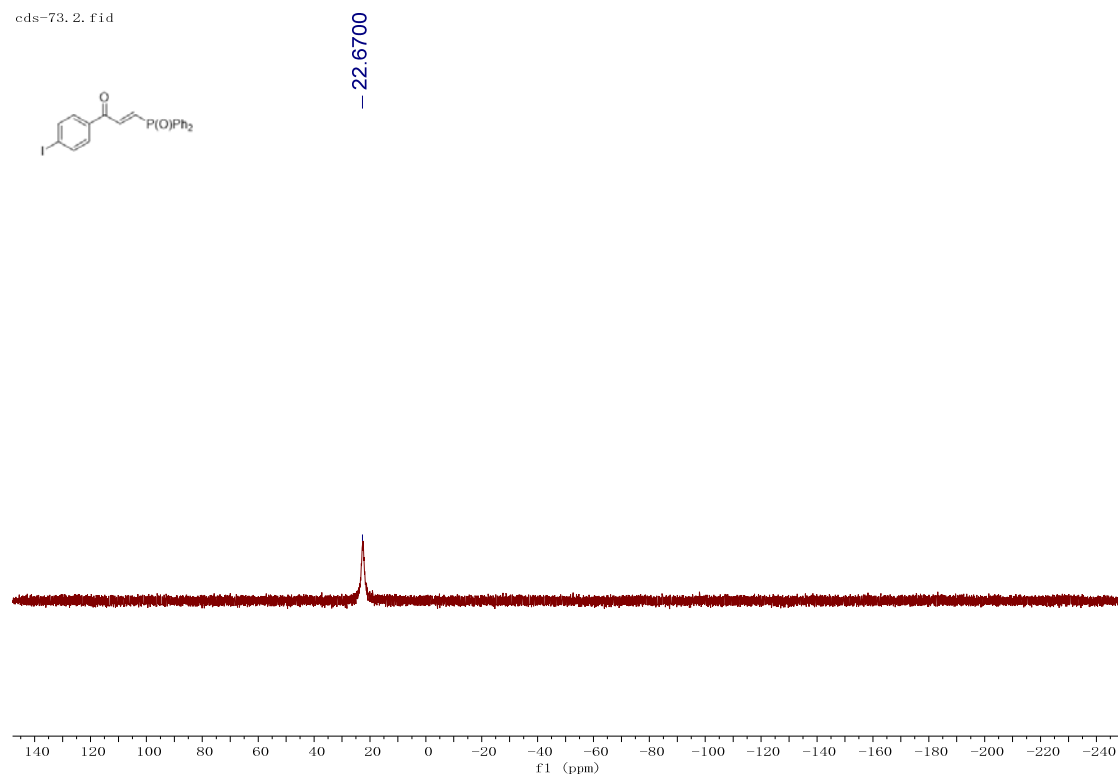

$^{31}\text{P}$  NMR spectrum of **5g** (162 MHz,  $\text{CDCl}_3$ )



cds-76.1.fid

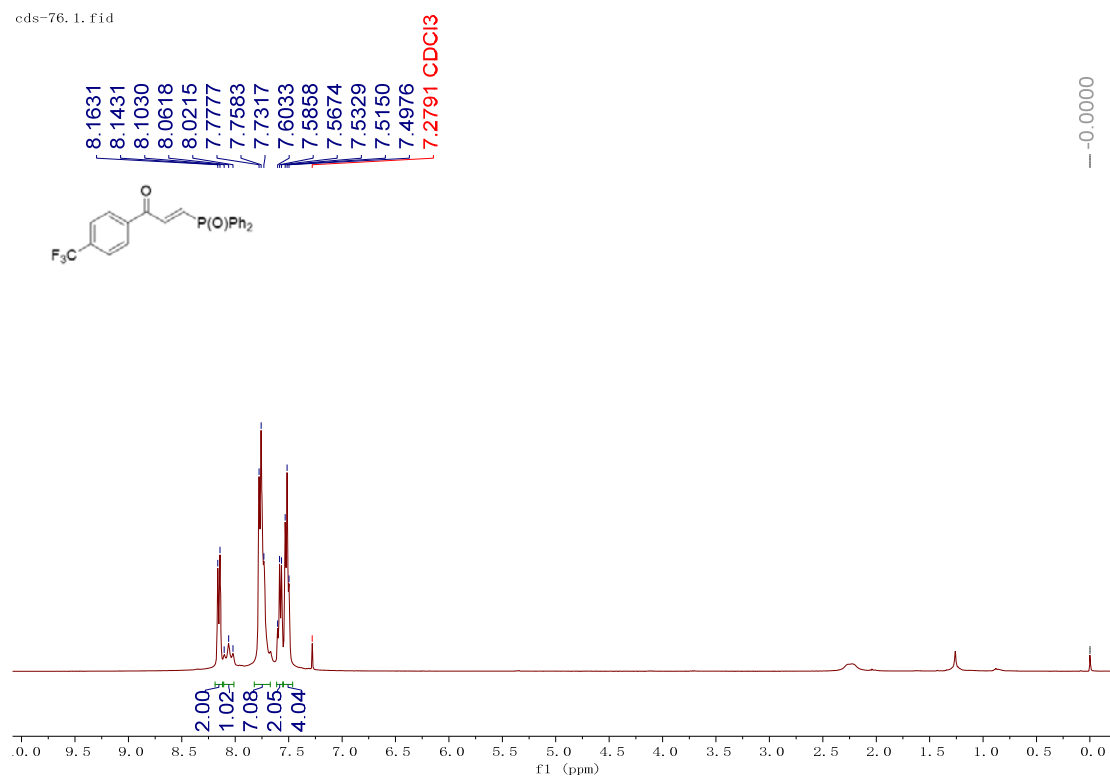

<sup>1</sup>H NMR spectrum of **5h** (400 MHz, CDCl<sub>3</sub>)

cds-76-c.1.fid

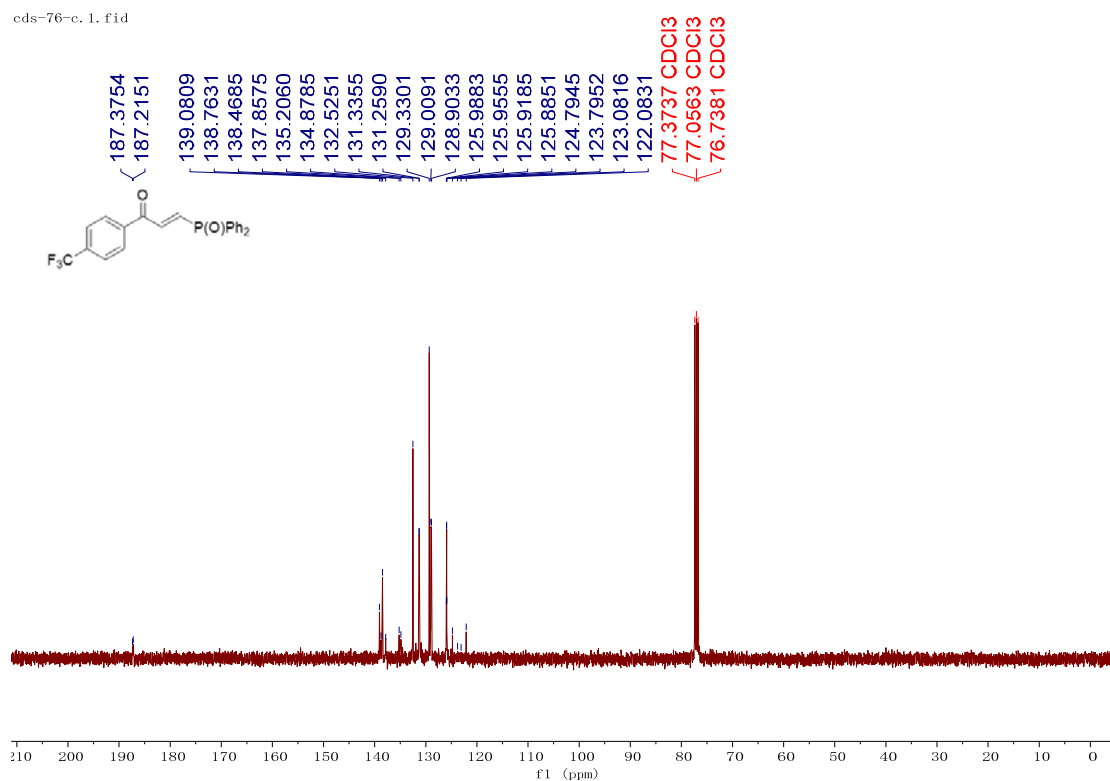

<sup>13</sup>C NMR spectrum of **5h** (100 MHz, CDCl<sub>3</sub>)

cds-76.2.fid

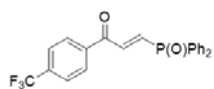

-22.3807

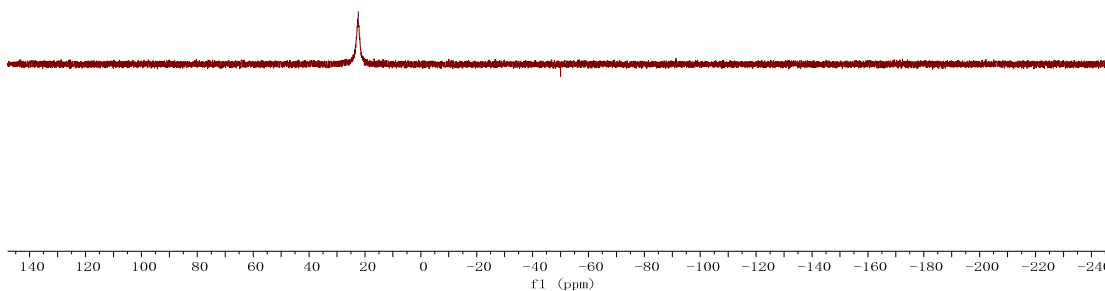

$^{31}\text{P}$  NMR spectrum of **5h** (162 MHz,  $\text{CDCl}_3$ )

cds-76-f.1.fid

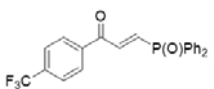

-63.24

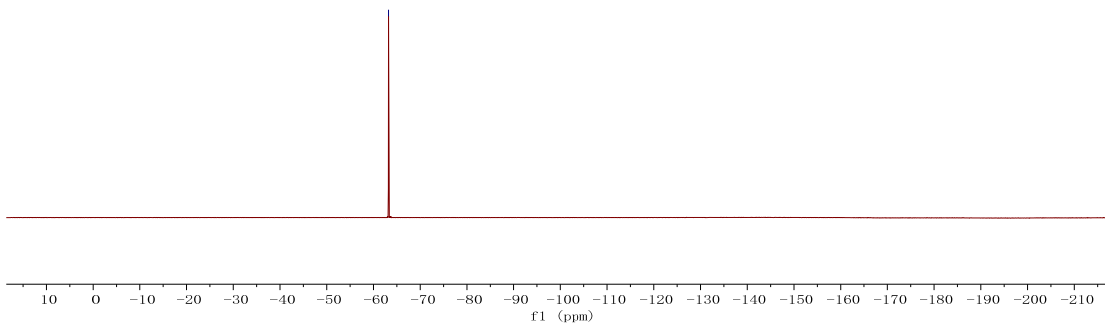

$^{19}\text{F}$  NMR spectrum of **5h** (376 MHz,  $\text{CDCl}_3$ )

cds-77.1.fid

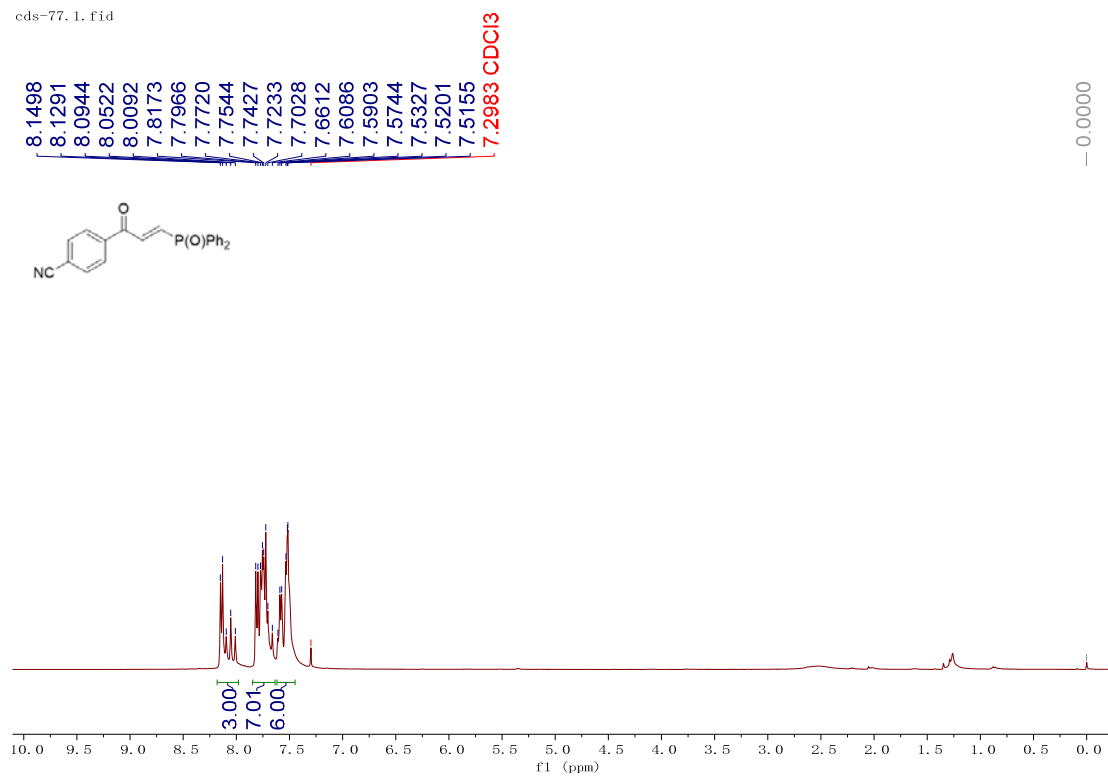

<sup>1</sup>H NMR spectrum of **5i** (400 MHz, CDCl<sub>3</sub>)

cds-77-c.1.fid

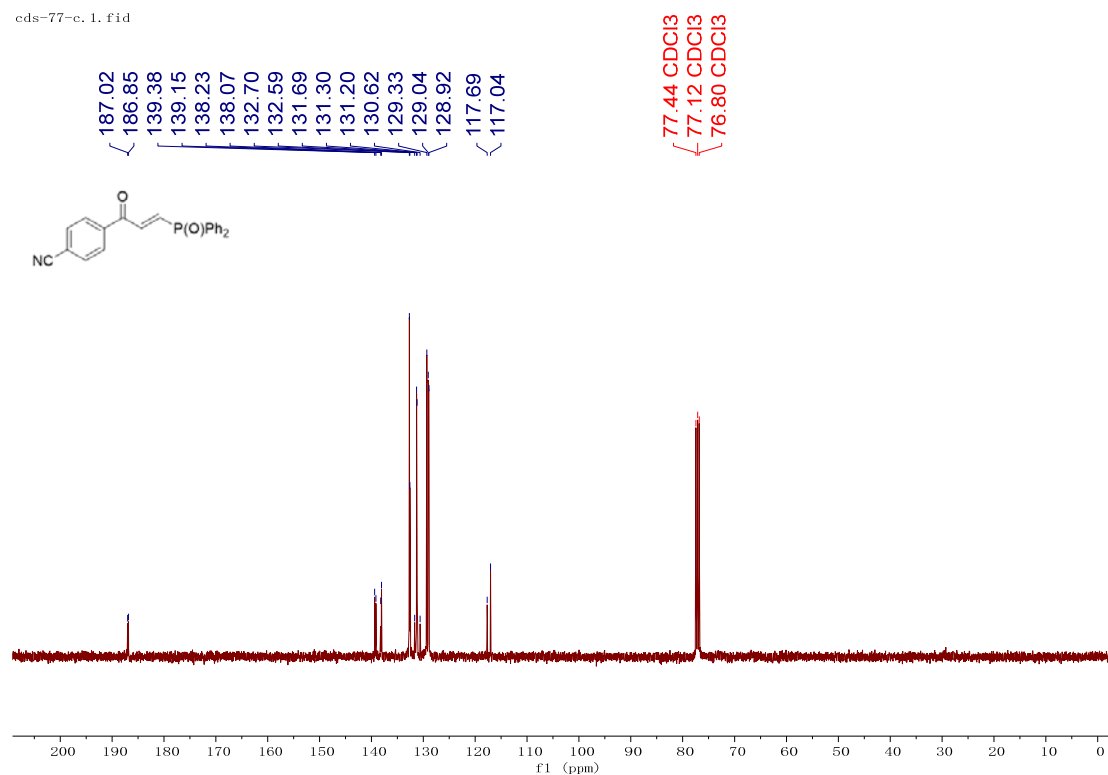

<sup>13</sup>C NMR spectrum of **5i** (100 MHz, CDCl<sub>3</sub>)

cds-77.2.fid

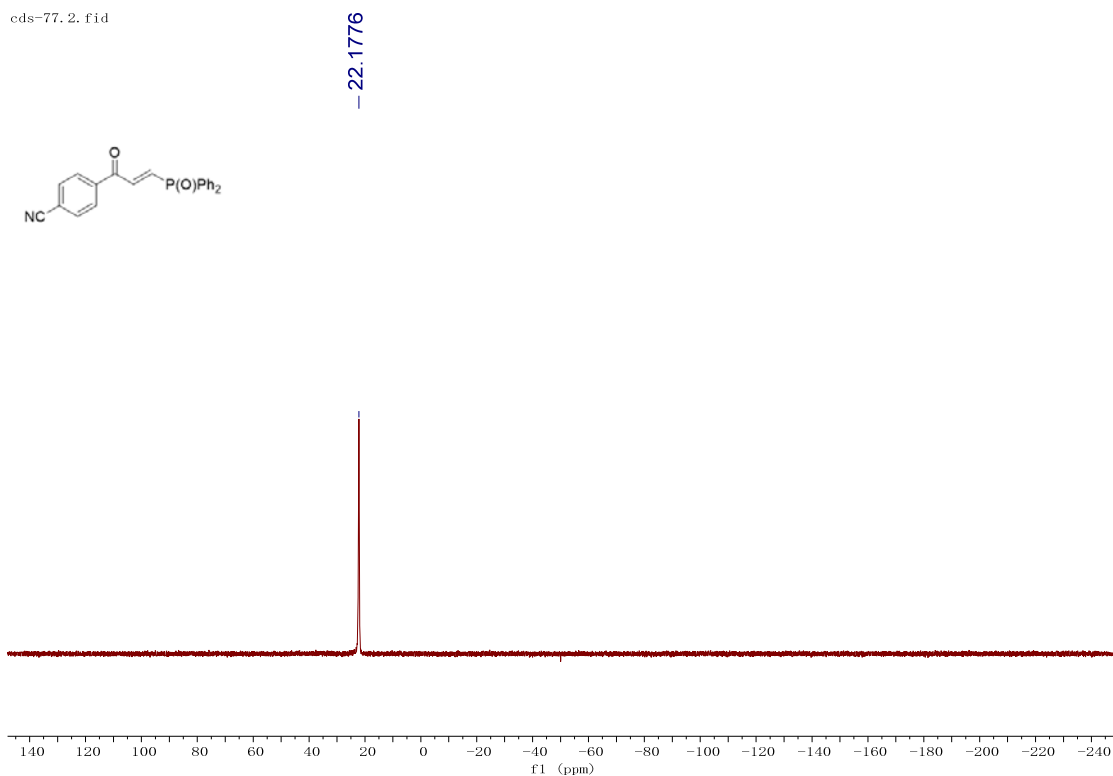

<sup>31</sup>P NMR spectrum of **5i** (162 MHz, CDCl<sub>3</sub>)

cds-74.1.fid

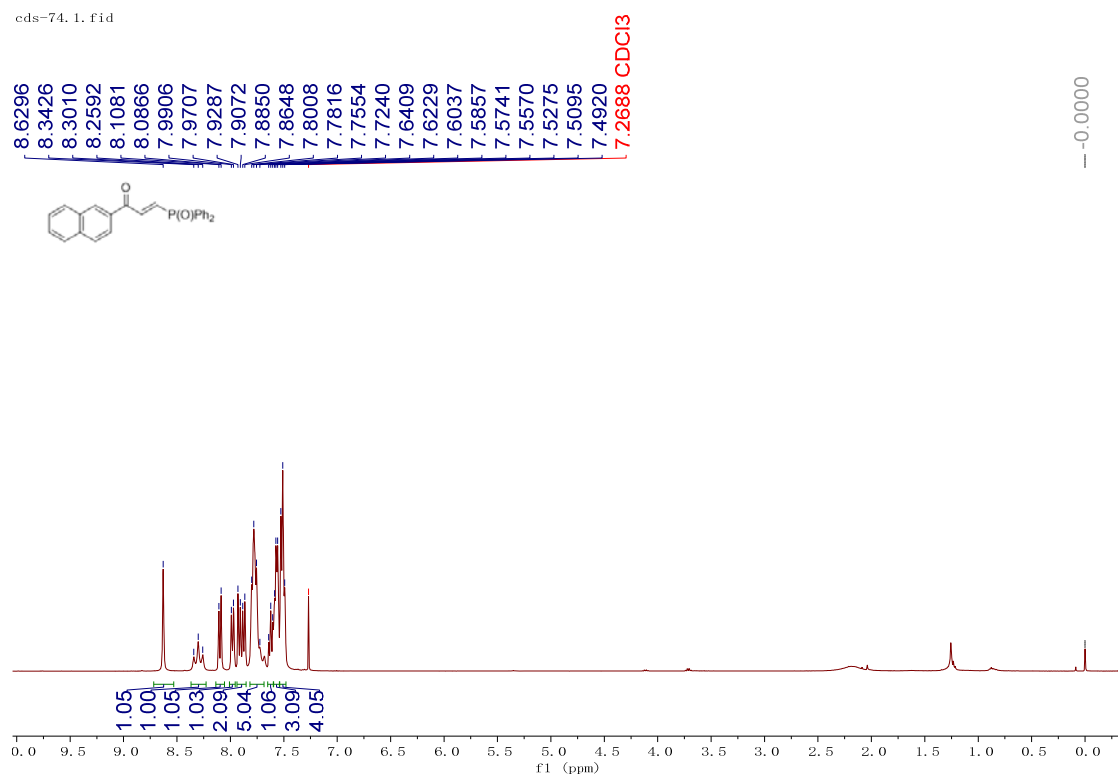

<sup>1</sup>H NMR spectrum of **5j** (400 MHz, CDCl<sub>3</sub>)

cds-74-c. 1. fid

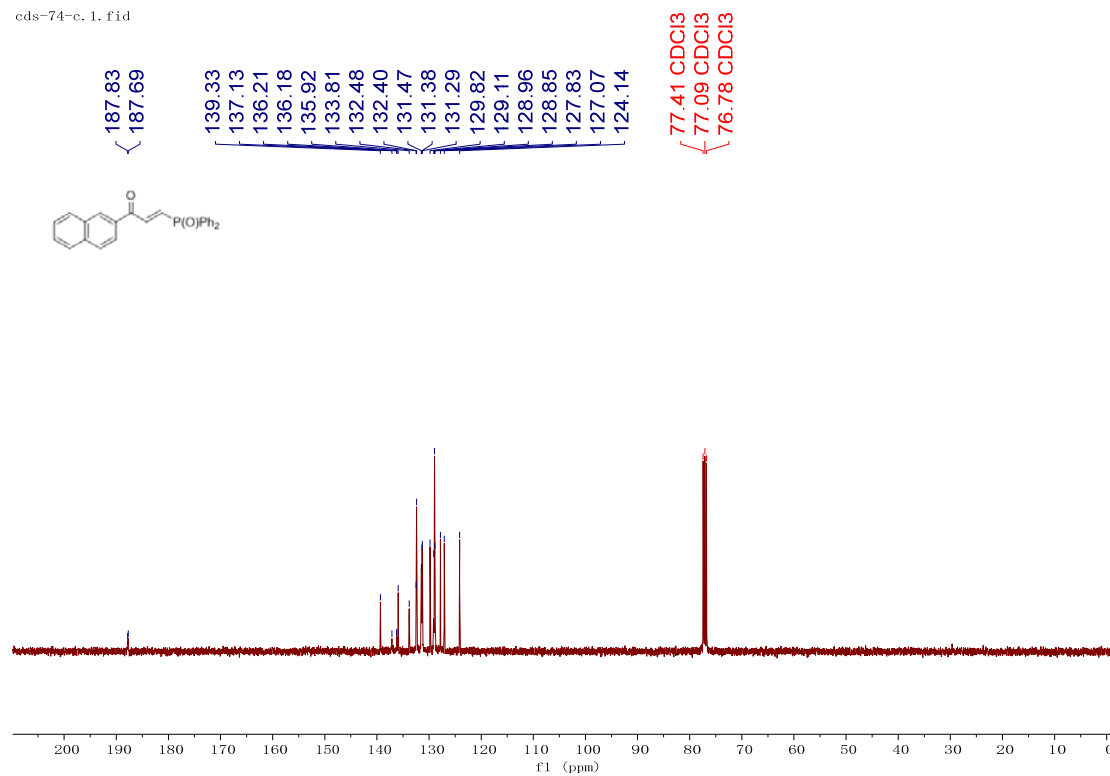

$^{13}\text{C}$  NMR spectrum of **5j** (100 MHz,  $\text{CDCl}_3$ )

cds-74. 2. fid

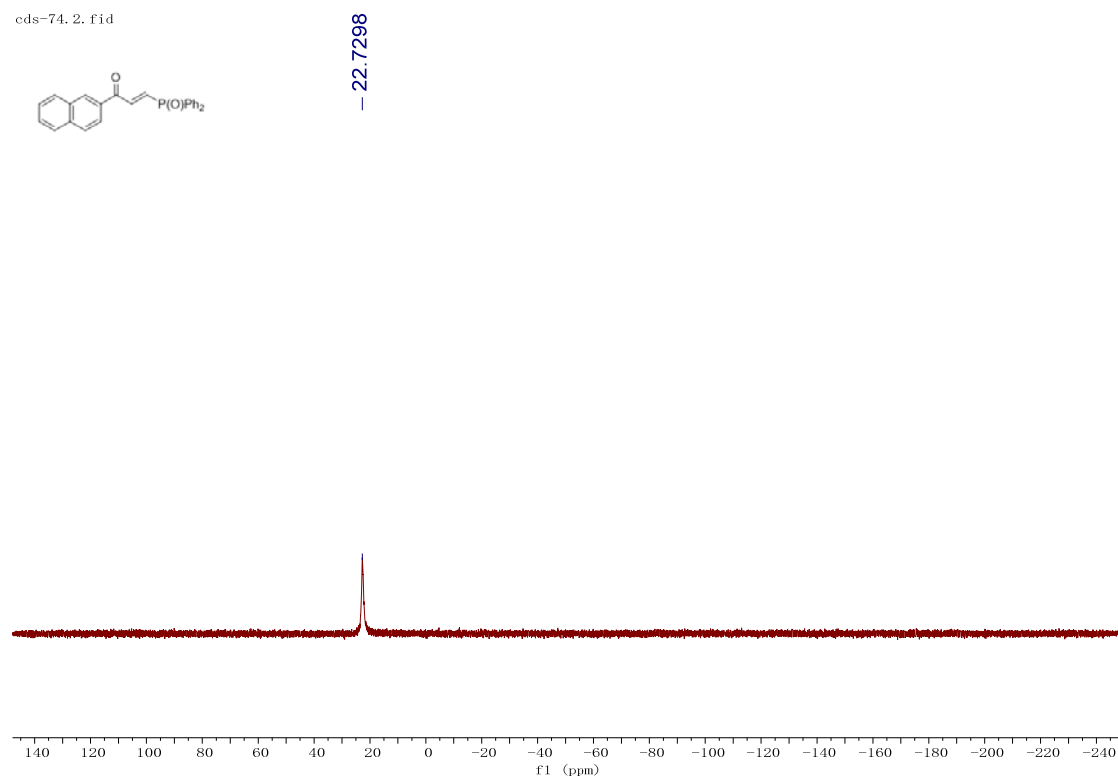

$^{31}\text{P}$  NMR spectrum of **5j** (162 MHz,  $\text{CDCl}_3$ )

CDS-79.1.fid

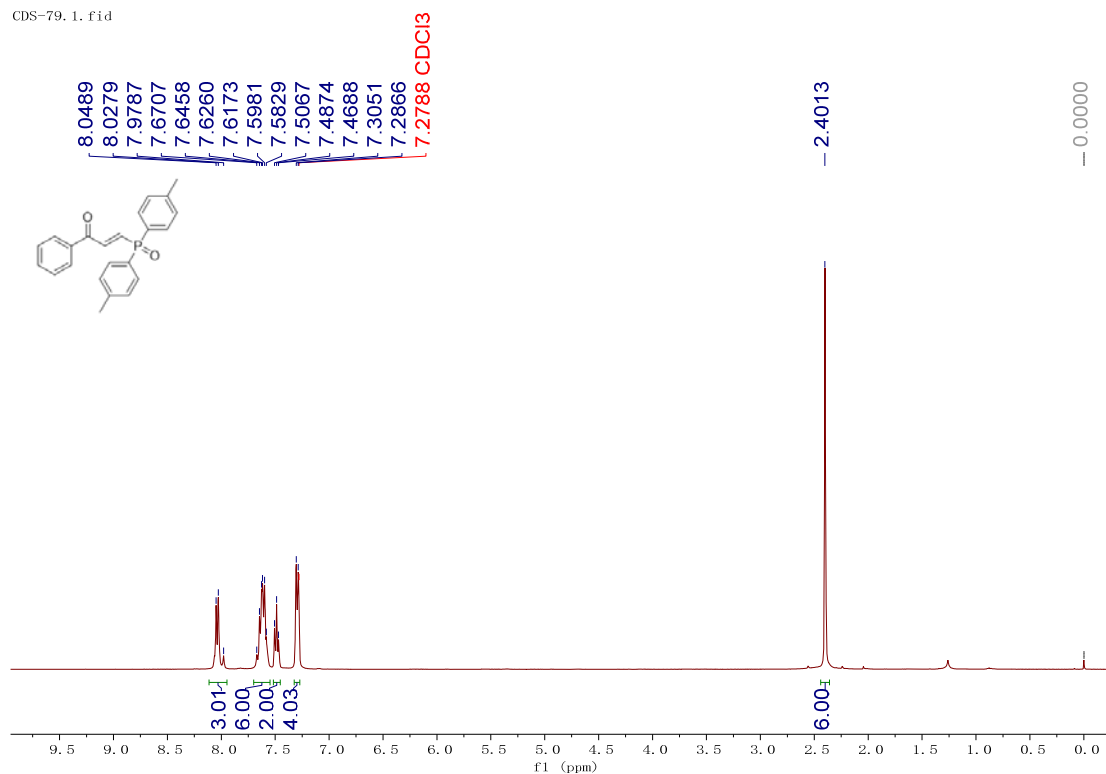

<sup>1</sup>H NMR spectrum of **5k** (400 MHz, CDCl<sub>3</sub>)

cds-79-c.1.fid

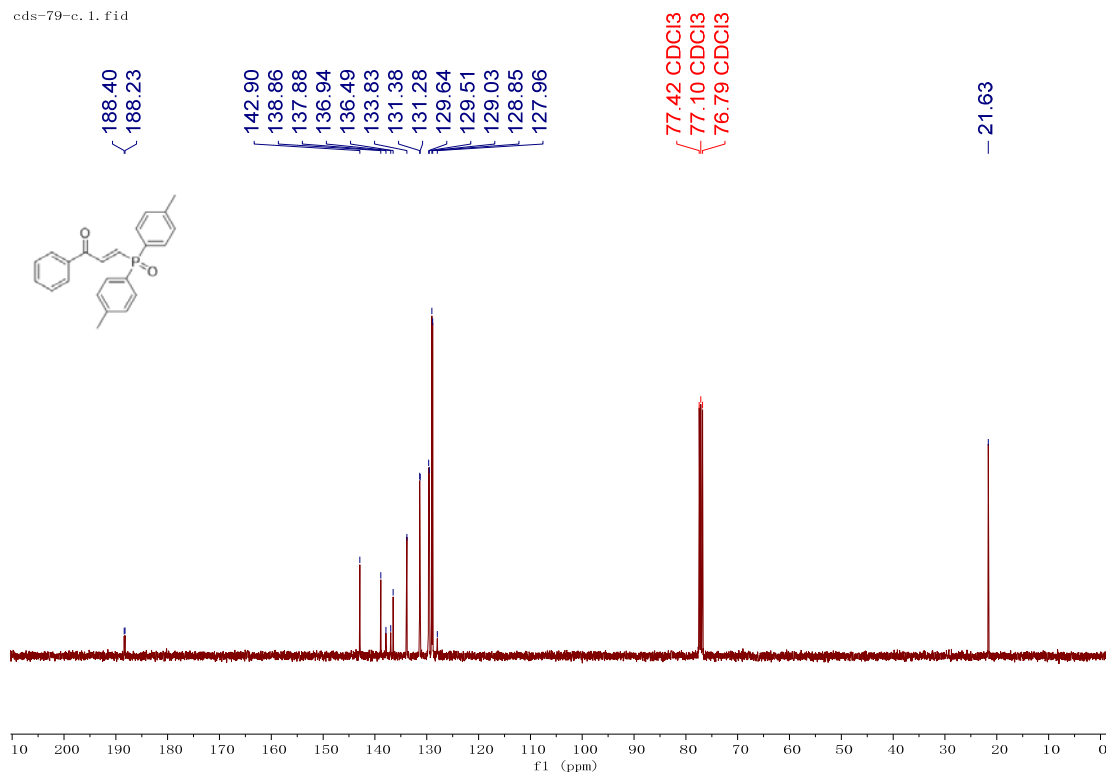

<sup>13</sup>C NMR spectrum of **5k** (100 MHz, CDCl<sub>3</sub>)

CDS-79.2.fid

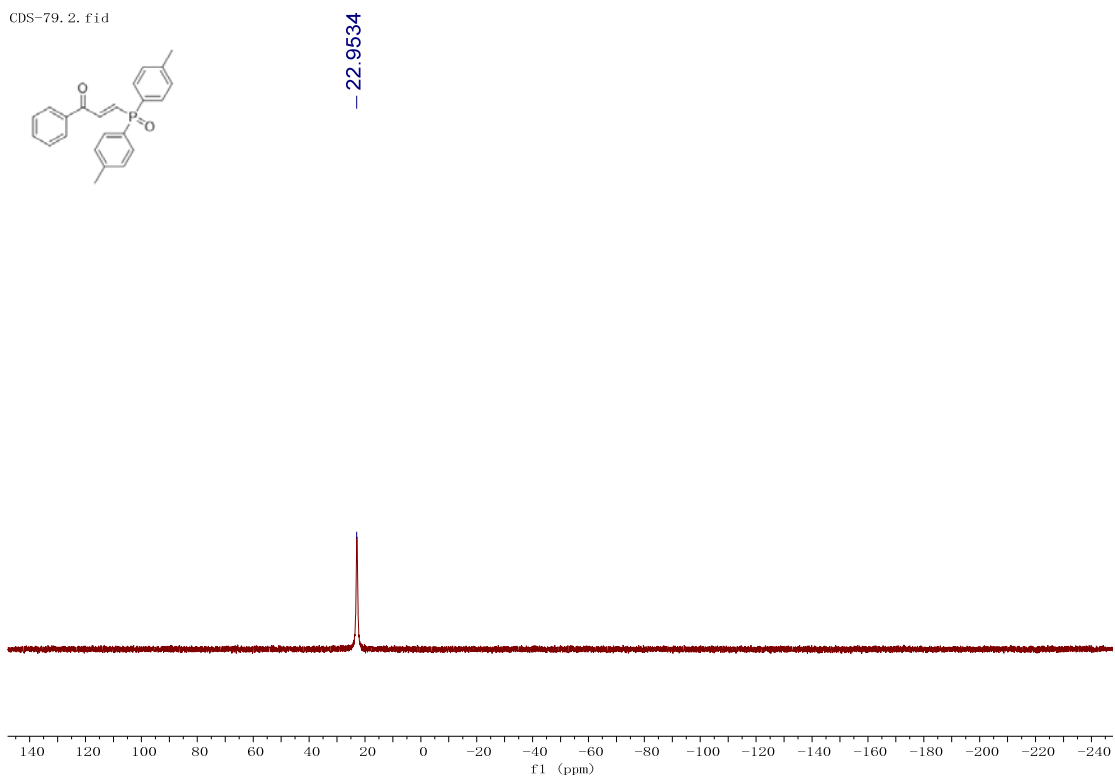

$^{31}\text{P}$  NMR spectrum of **5k** (162 MHz,  $\text{CDCl}_3$ )

CDS-78.1.fid

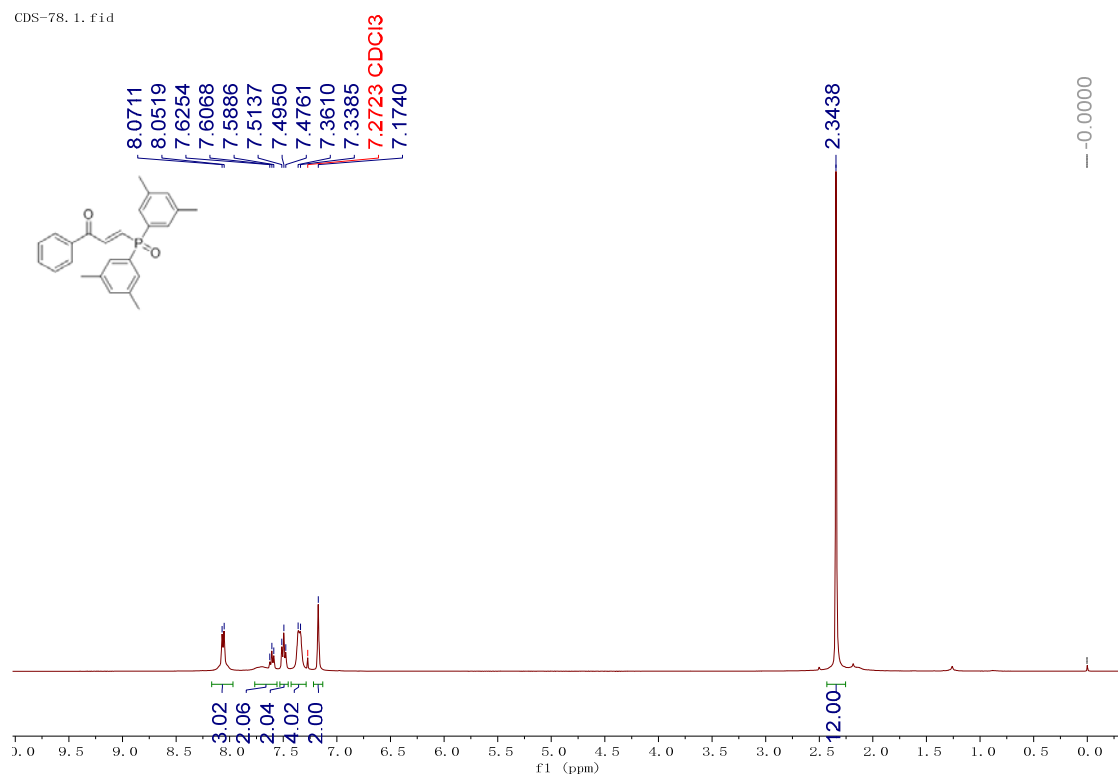

$^1\text{H}$  NMR spectrum of **5l** (400 MHz,  $\text{CDCl}_3$ )

cds-78-c. 1. fid

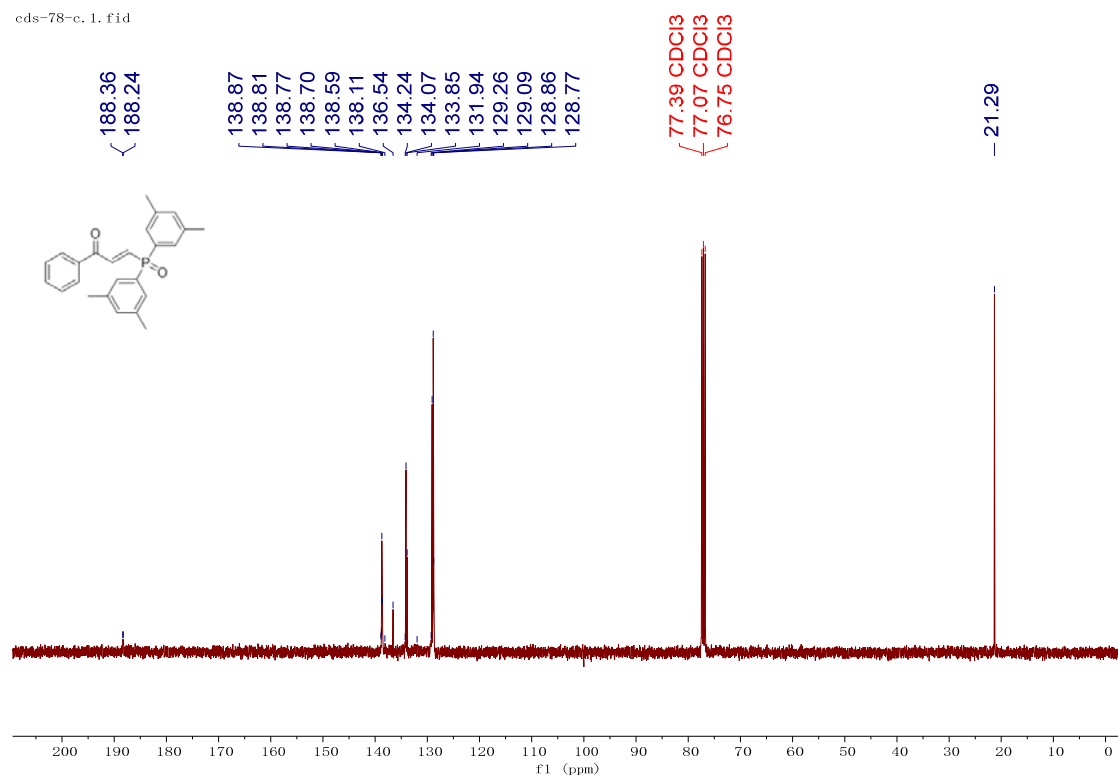

<sup>13</sup>C NMR spectrum of **5I** (100 MHz, CDCl<sub>3</sub>)

CDS-78. 2. fid

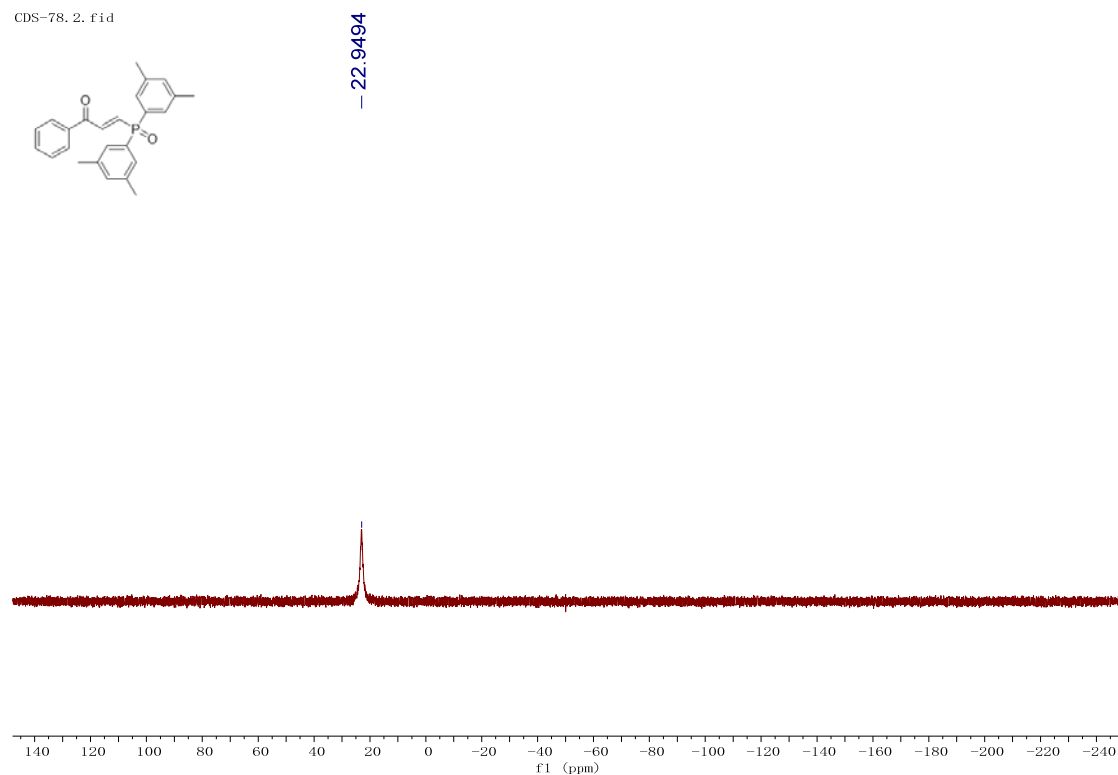

<sup>31</sup>P NMR spectrum of **5I** (162 MHz, CDCl<sub>3</sub>)



cds-80.1.fid

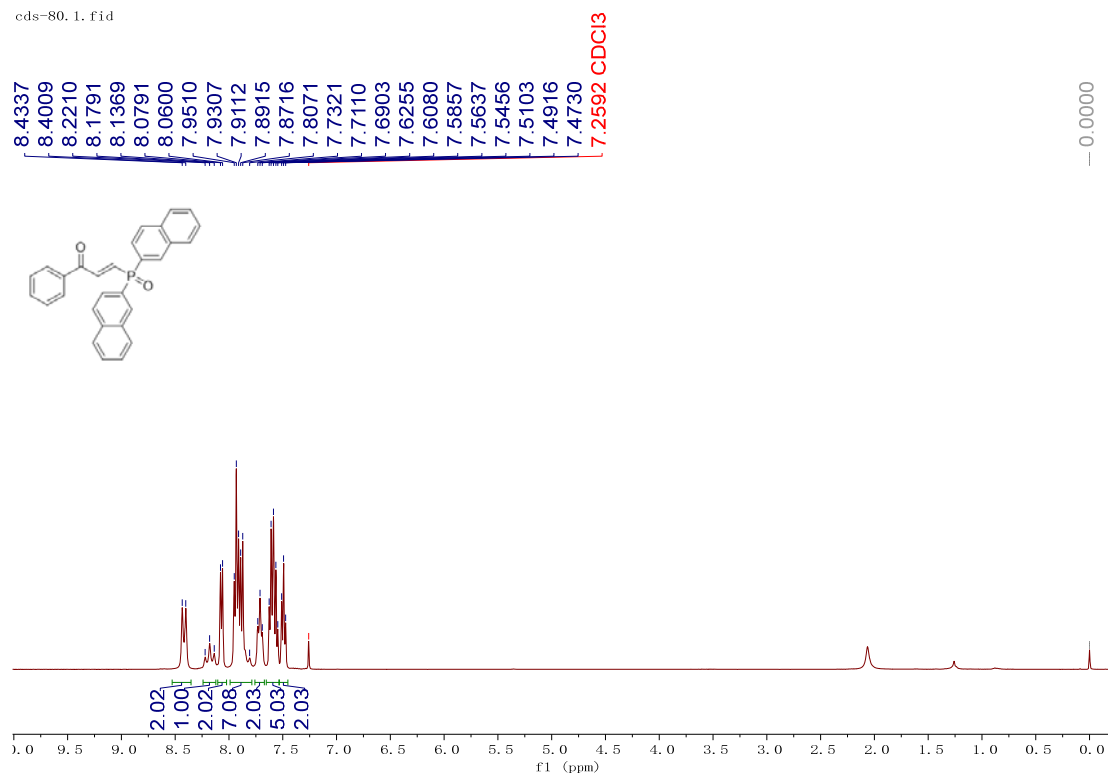

$^1\text{H}$  NMR spectrum of **5m** (400 MHz,  $\text{CDCl}_3$ )

cds-80-c.2.fid

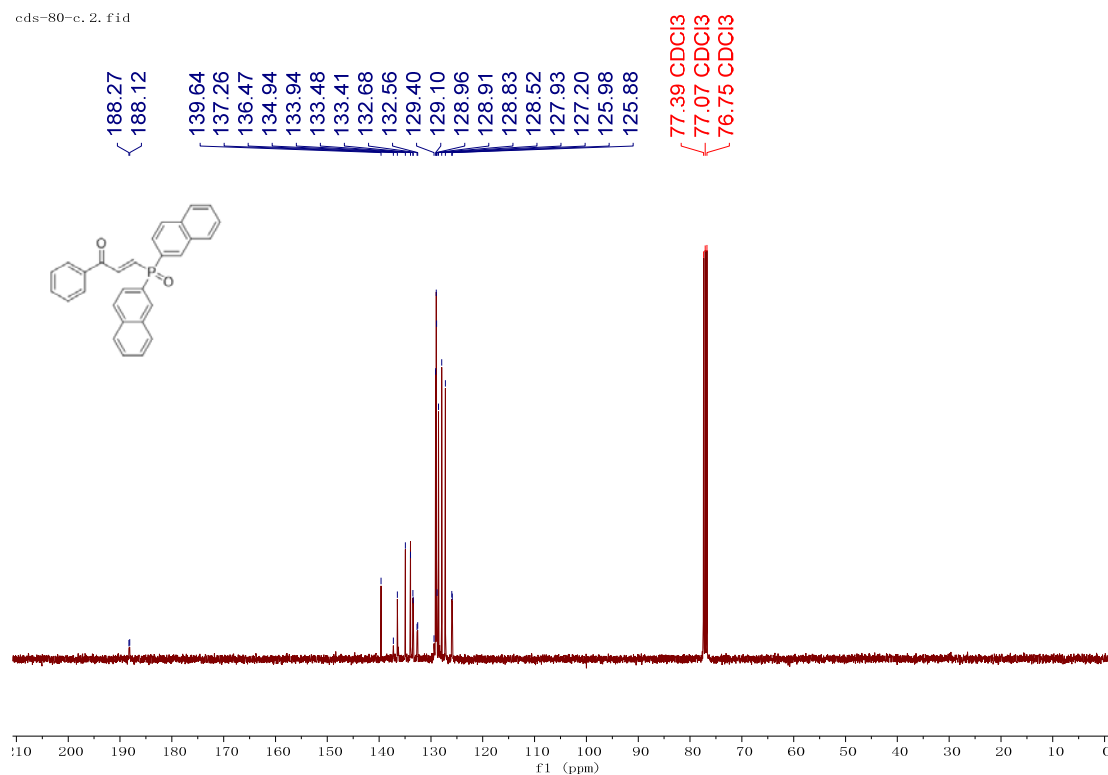

$^{13}\text{C}$  NMR spectrum of **5m** (100 MHz,  $\text{CDCl}_3$ )

cds-80.2.fid

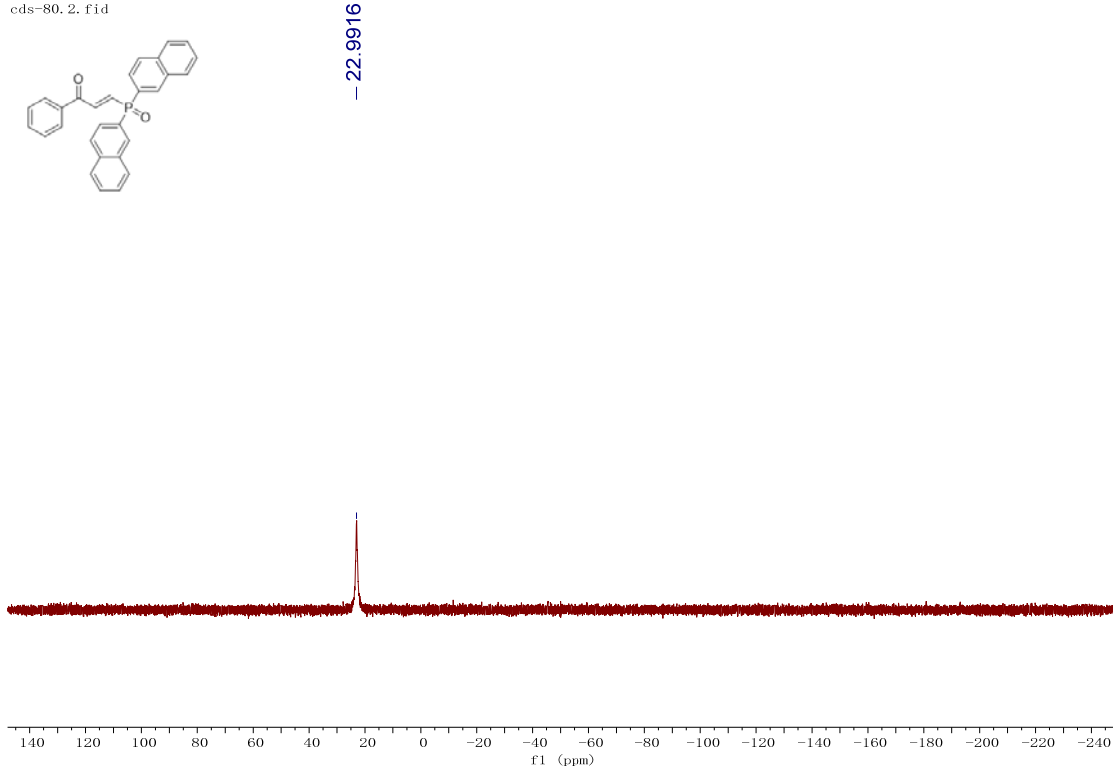

$^{31}\text{P}$  NMR spectrum of **5m** (162 MHz,  $\text{CDCl}_3$ )

cds-62.1.fid

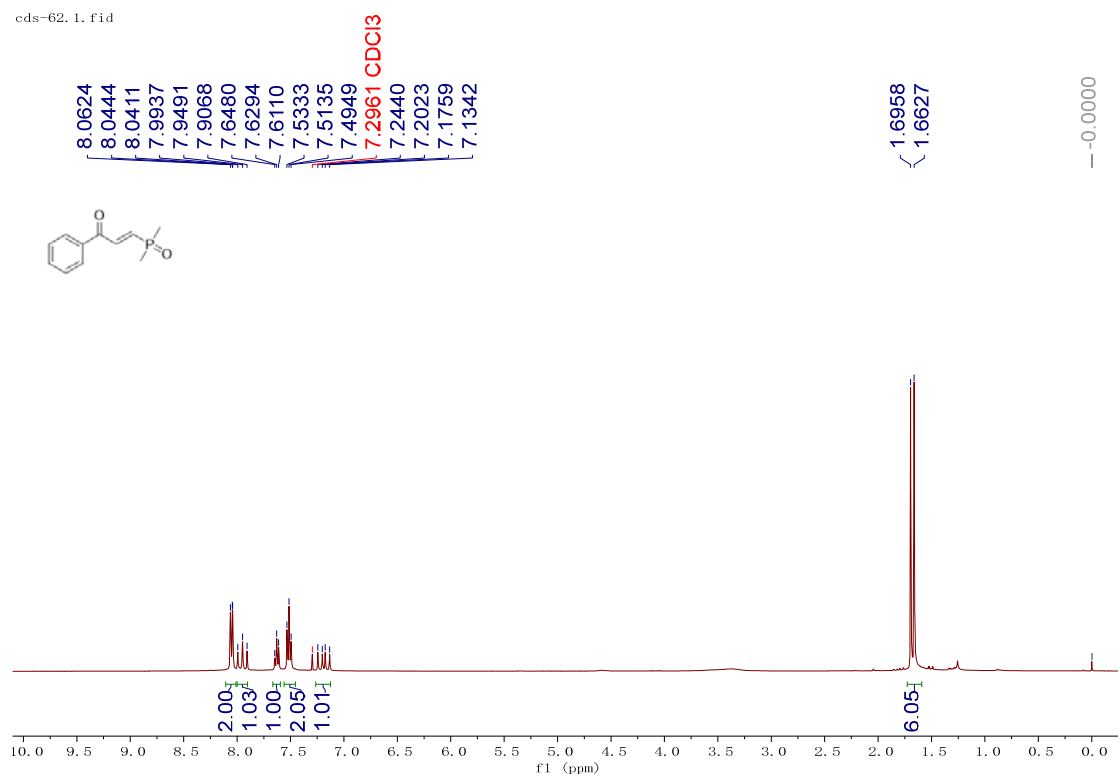

$^1\text{H}$  NMR spectrum of **5n** (400 MHz,  $\text{CDCl}_3$ )

cds-62-c. 1. fid

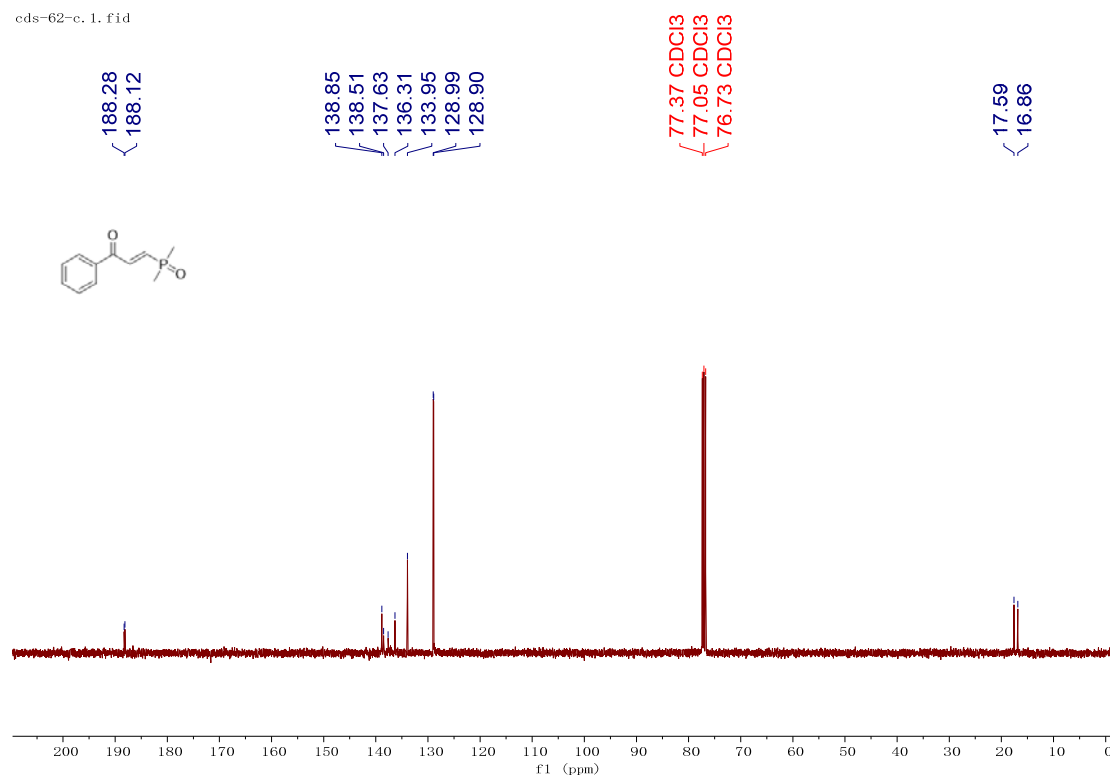

<sup>13</sup>C NMR spectrum of **5n** (100 MHz, CDCl<sub>3</sub>)

cds-62.2. fid

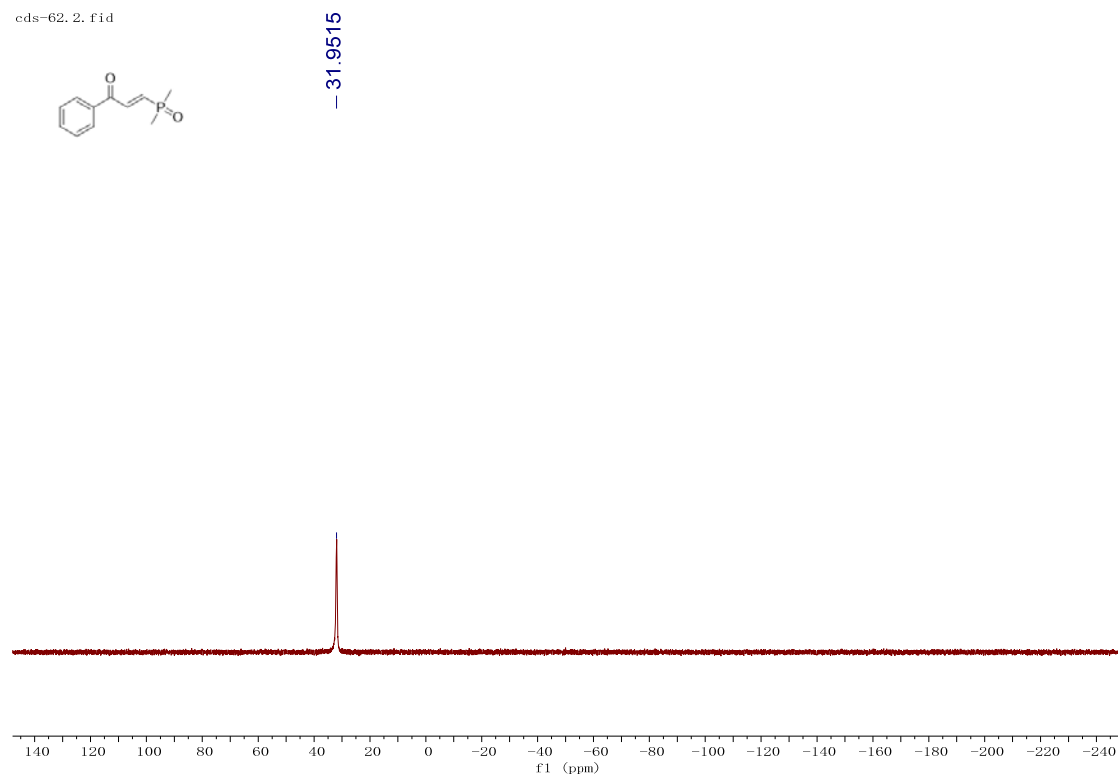

<sup>31</sup>P NMR spectrum of **5n** (162 MHz, CDCl<sub>3</sub>)

cds-52.1.fid

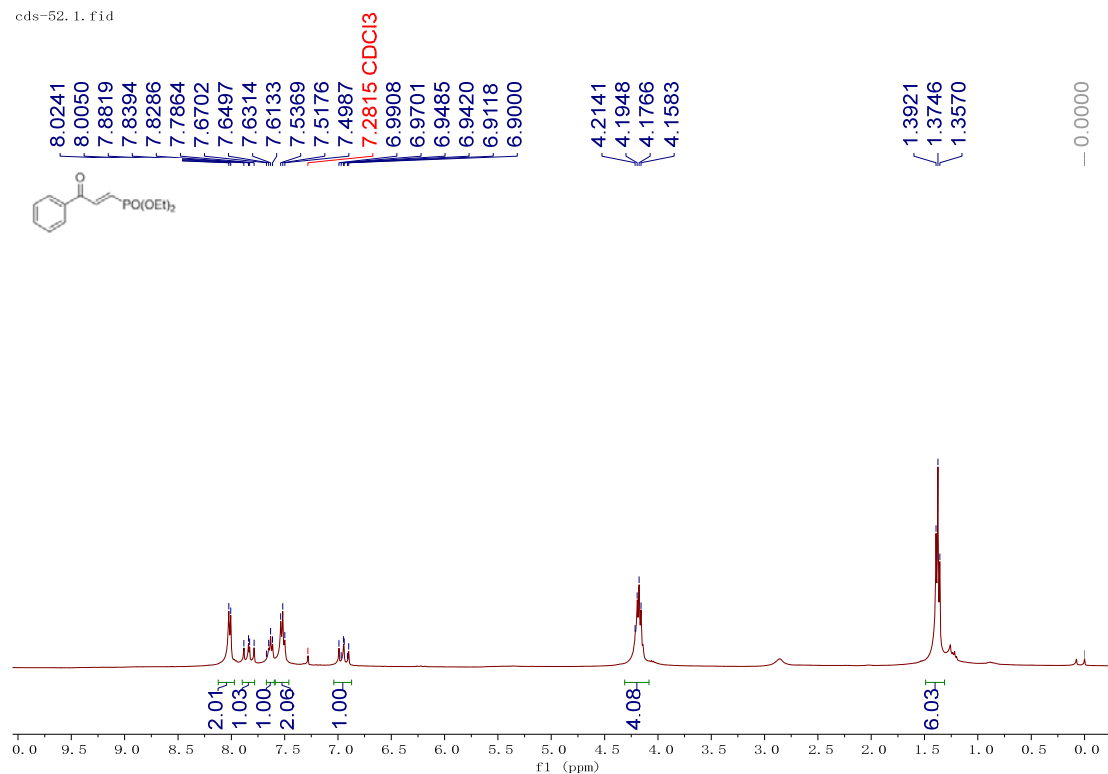

<sup>1</sup>H NMR spectrum of **5o** (400 MHz, CDCl<sub>3</sub>)

cds-52-c.1.fid

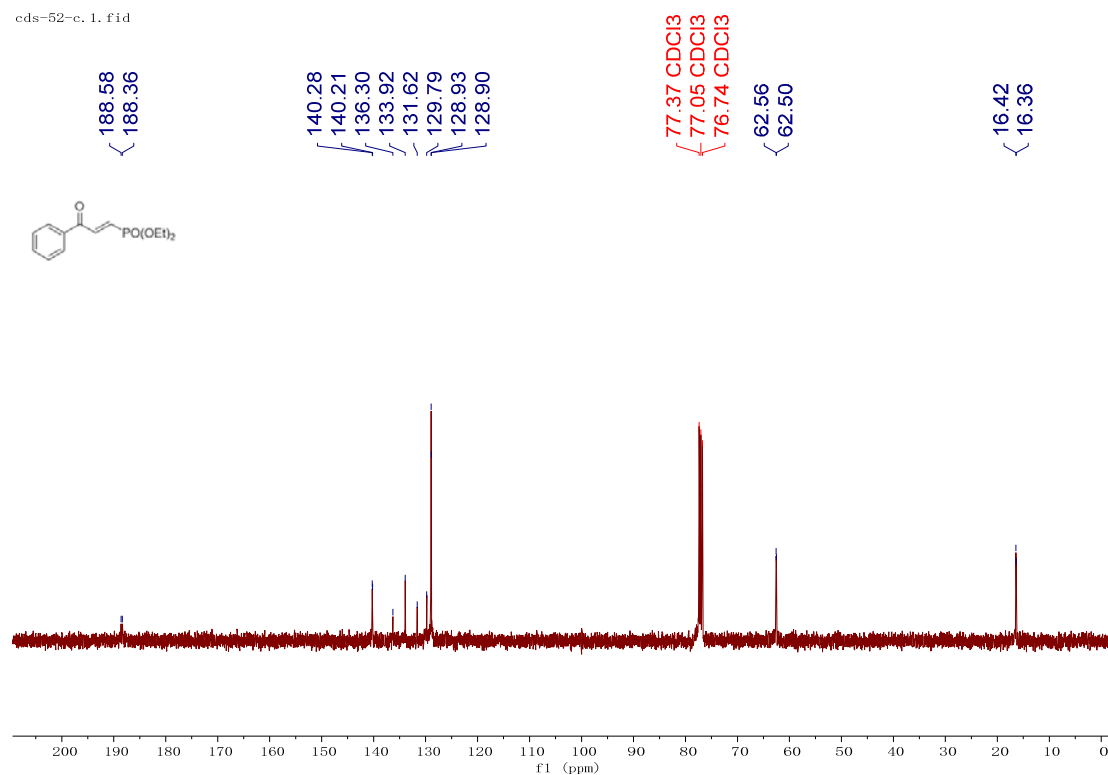

<sup>13</sup>C NMR spectrum of **5o** (100 MHz, CDCl<sub>3</sub>)

cds-52.2.fid

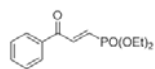

- 15.8140

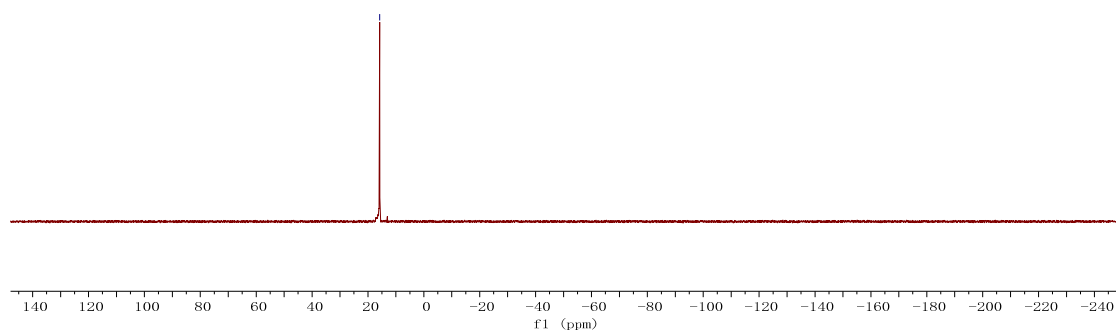

cds-57.1.fid

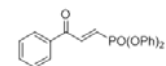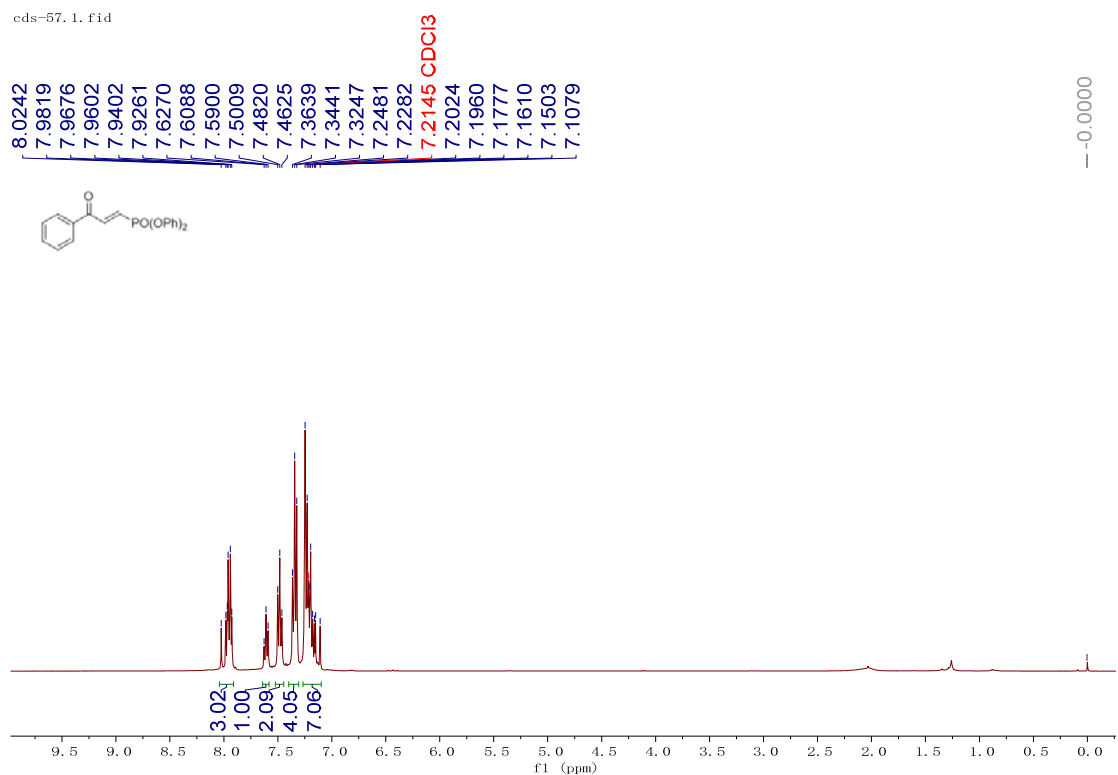

cds-57-c. 1. fid

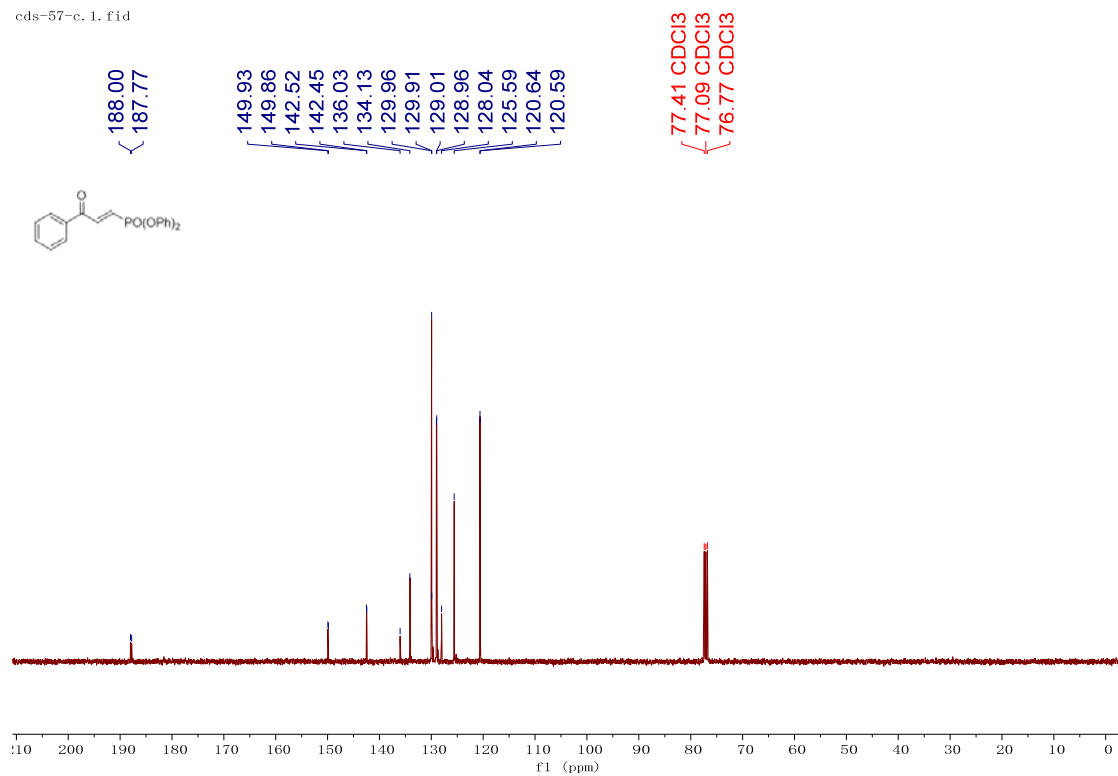

$^{13}\text{C}$  NMR spectrum of **5p** (100 MHz,  $\text{CDCl}_3$ )

cds-57.2. fid

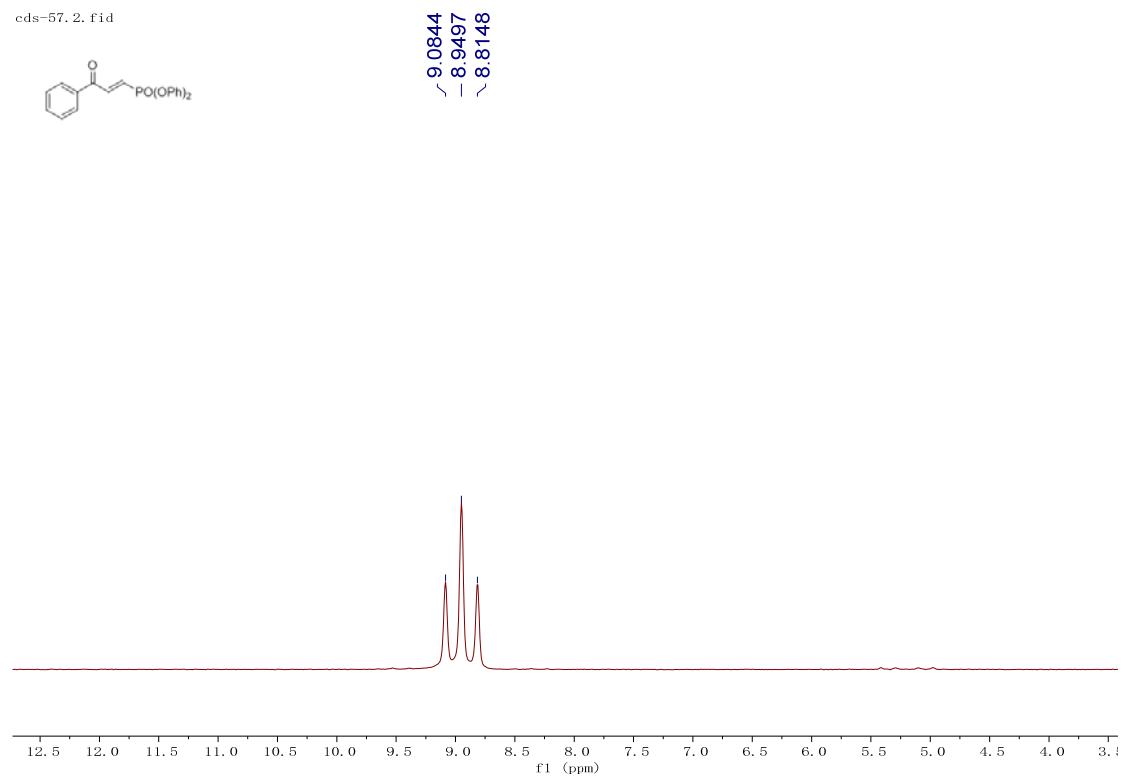

$^{31}\text{P}$  NMR spectrum of **5p** (162 MHz,  $\text{CDCl}_3$ )

cds-58. 1. fid

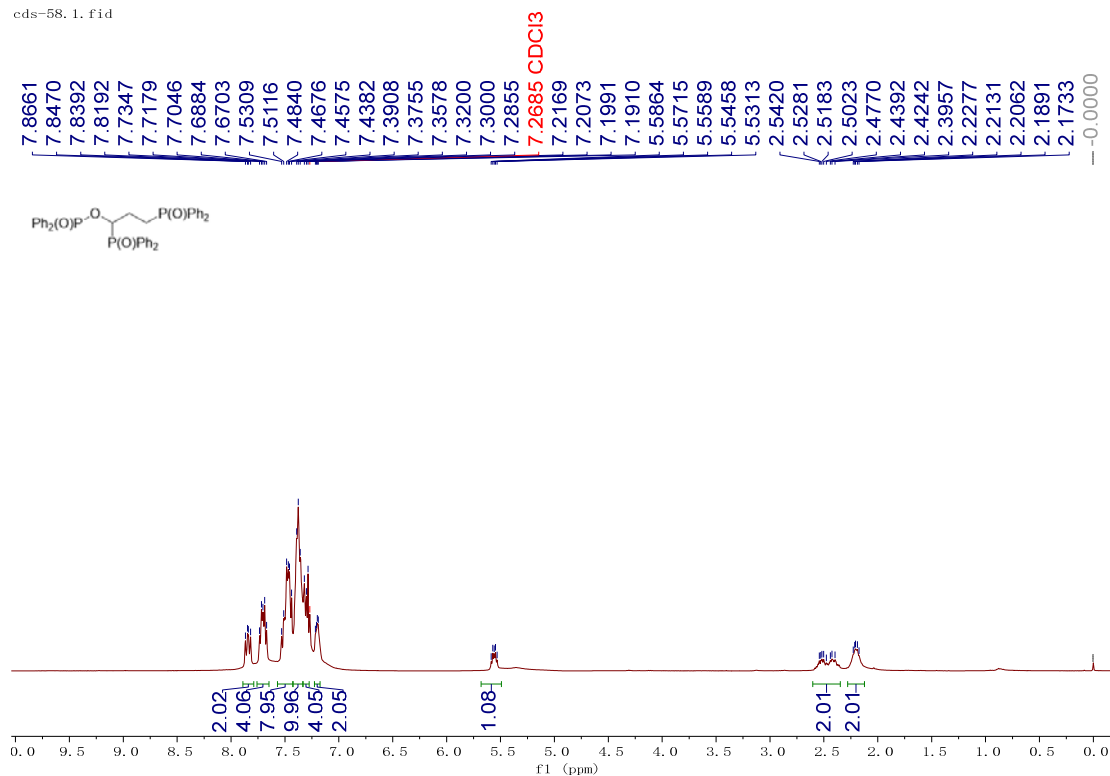

<sup>1</sup>H NMR spectrum of 7 (400 MHz, CDCl<sub>3</sub>)

cds-58-c. 1. fid

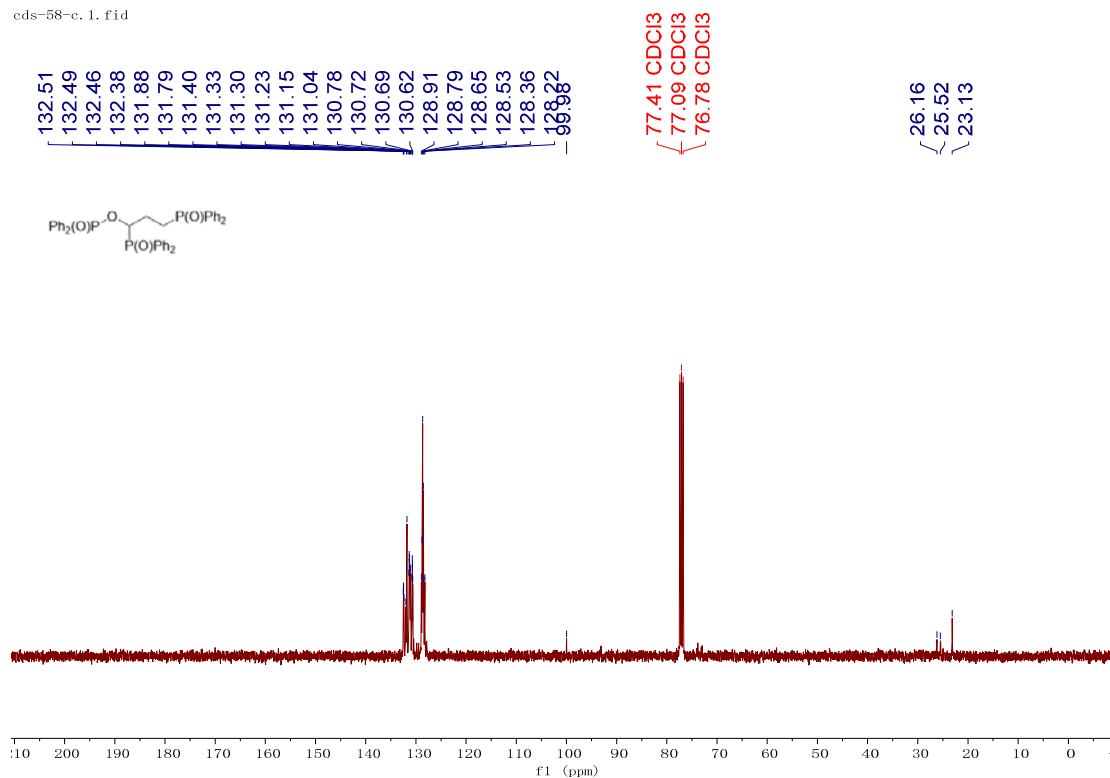

<sup>13</sup>C NMR spectrum of 7 (100 MHz, CDCl<sub>3</sub>)

cds-58. 2. fid

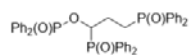

34.7365  
33.5154  
31.1765

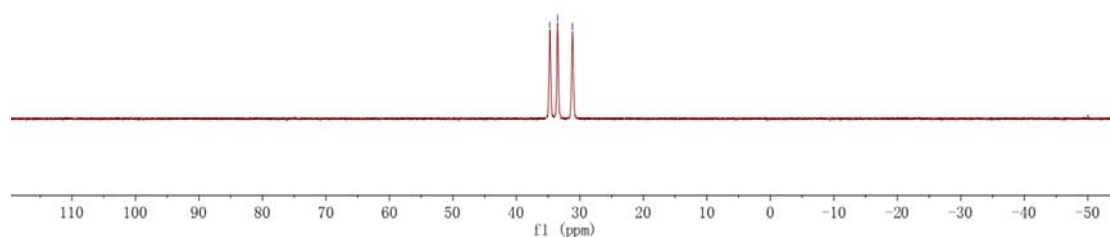

<sup>31</sup>P NMR spectrum of **7** (162 MHz, CDCl<sub>3</sub>)

cds-83. 1. fid

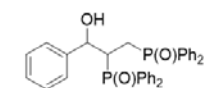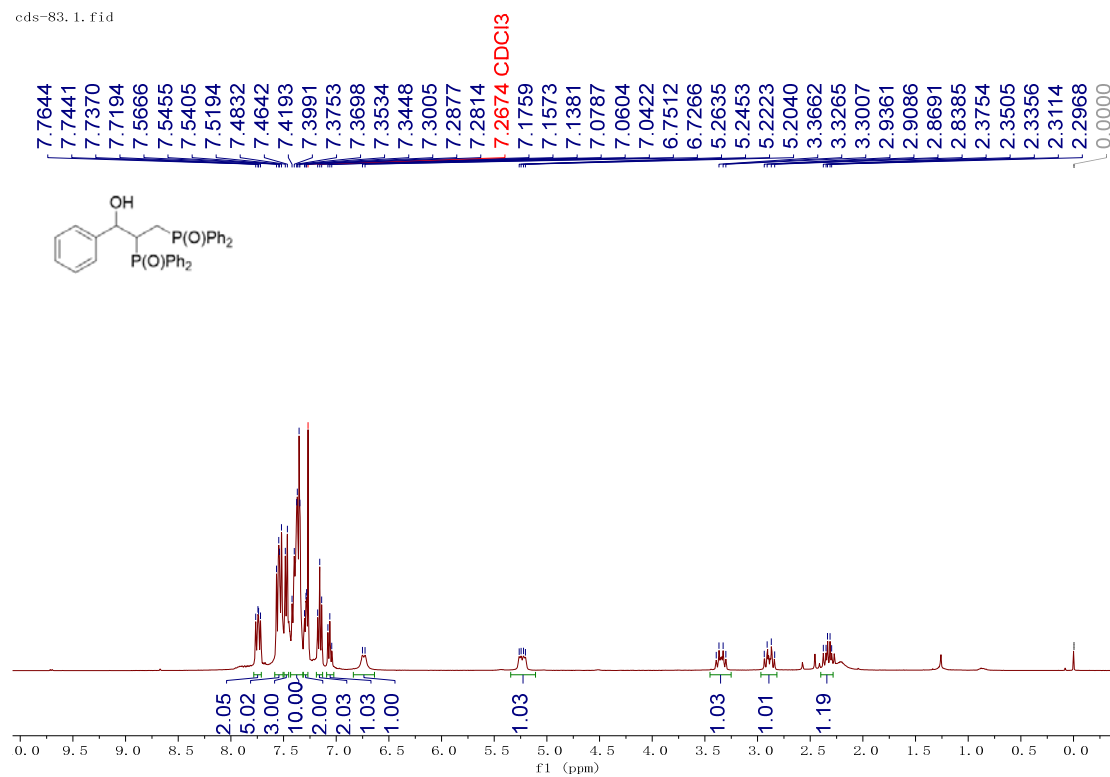

<sup>1</sup>H NMR spectrum of **8** (400 MHz, CDCl<sub>3</sub>)



cds-83-c. 1. fid

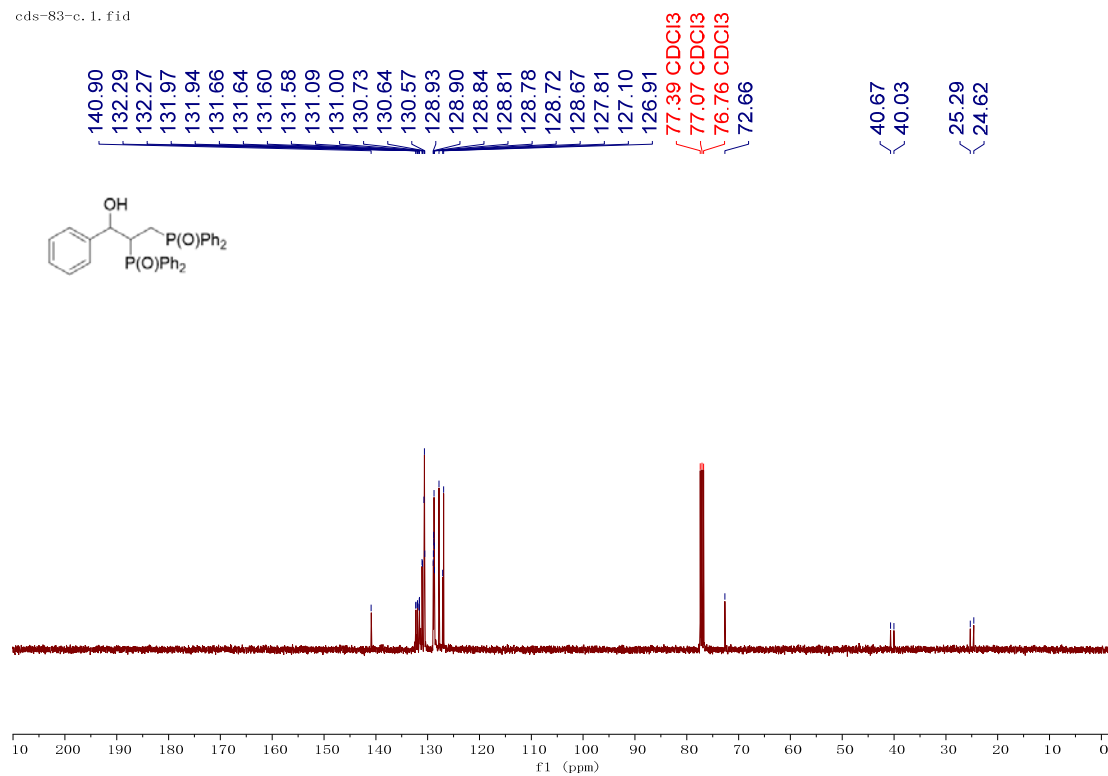

<sup>13</sup>C NMR spectrum of **8** (100 MHz, CDCl<sub>3</sub>)

cds-83. 2. fid

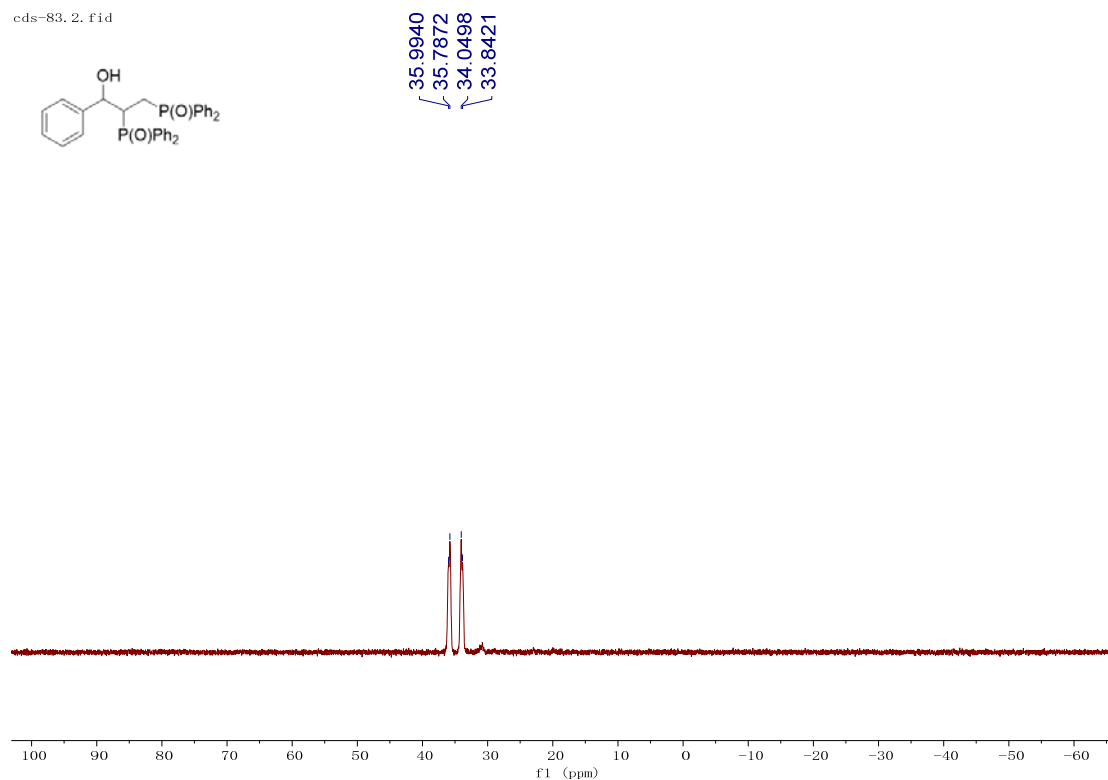

<sup>31</sup>P NMR spectrum of **8** (162 MHz, CDCl<sub>3</sub>)

cds-85-1-re. 1. fid

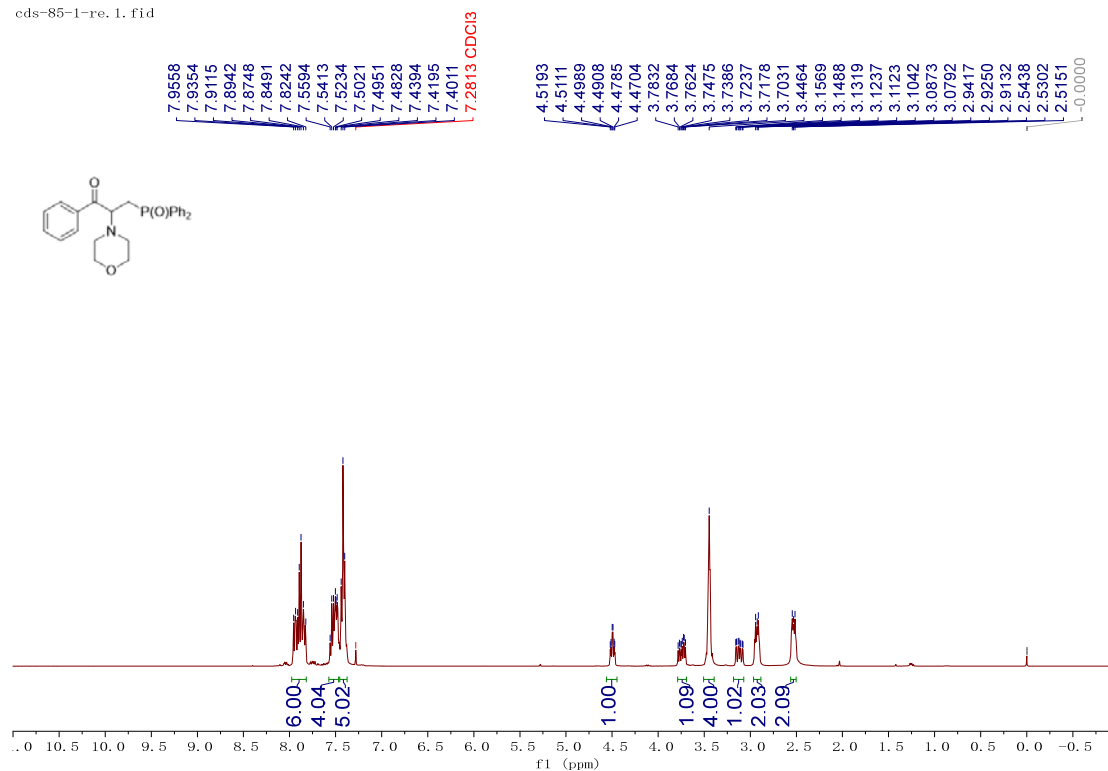

<sup>1</sup>H NMR spectrum of **10** (400 MHz, CDCl<sub>3</sub>)

cds-85-1-re. 2. fid

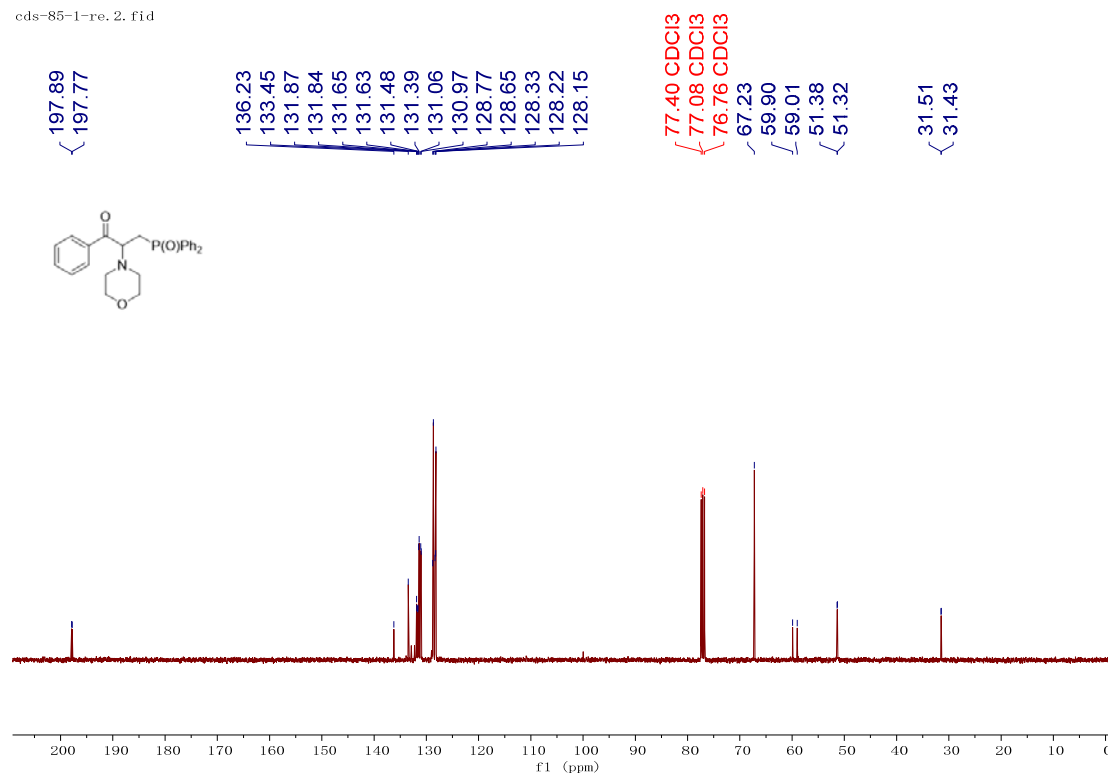

<sup>13</sup>C NMR spectrum of **10** (100 MHz, CDCl<sub>3</sub>)

cds-85-1.3.fid

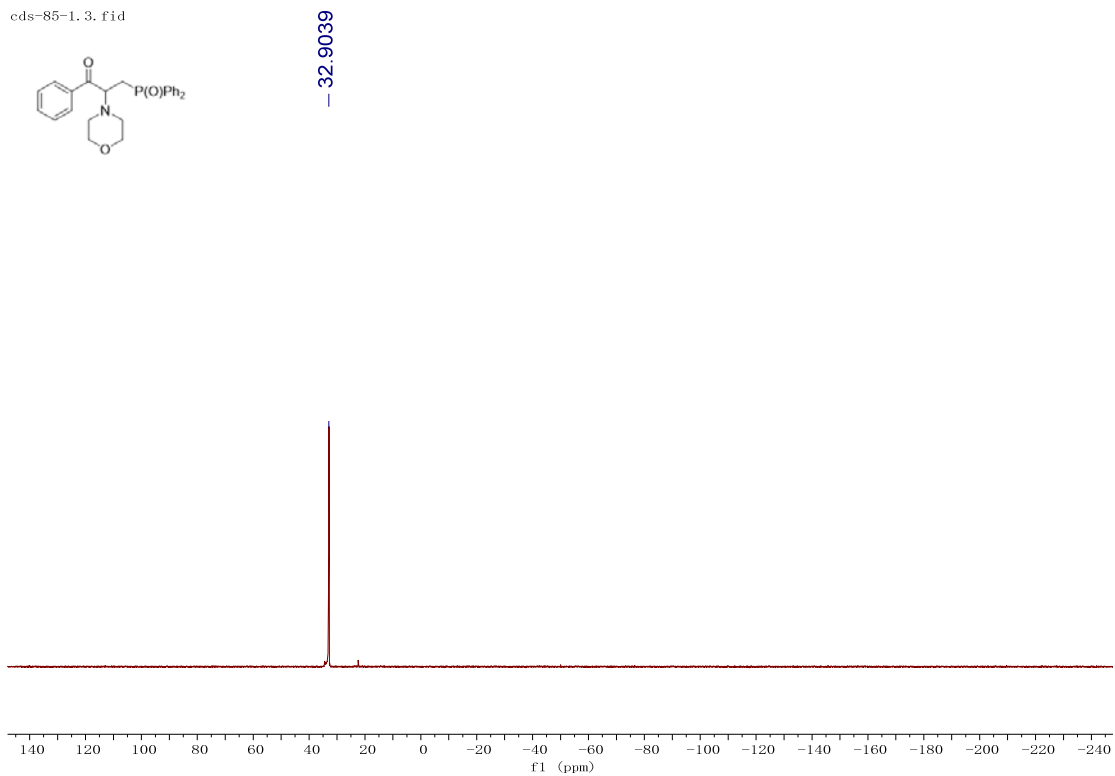

<sup>31</sup>P NMR spectrum of **10** (162 MHz, CDCl<sub>3</sub>)

cds-88-1.1.fid

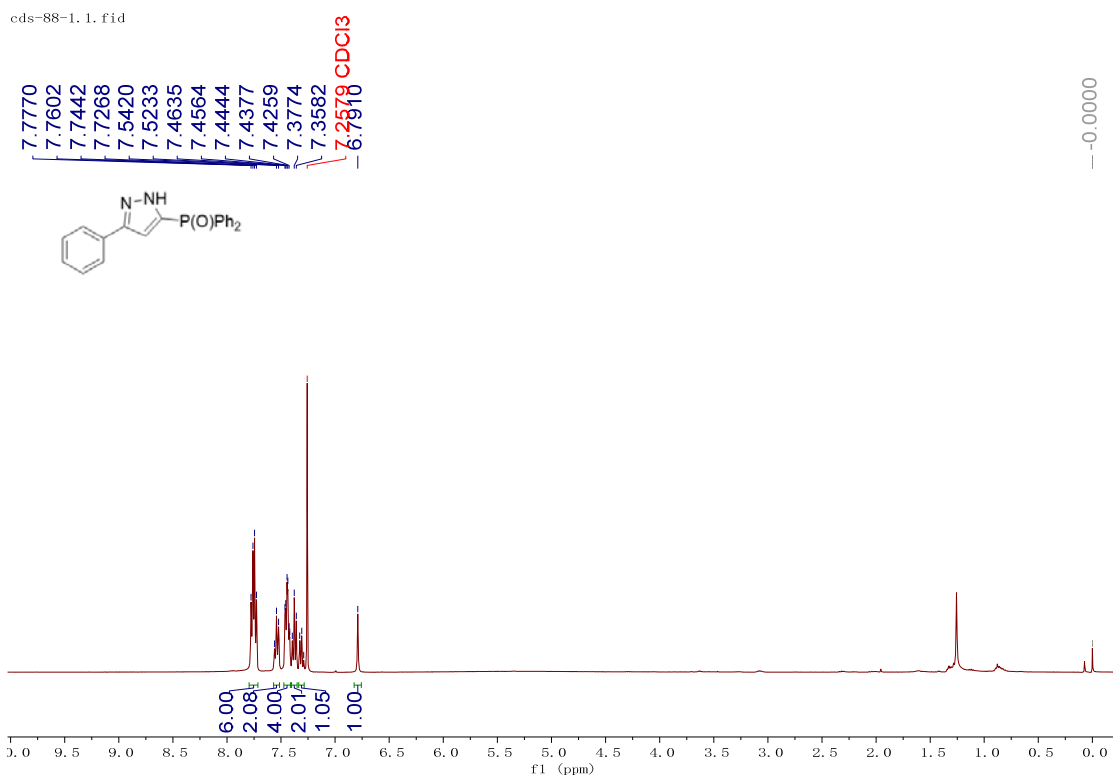

<sup>1</sup>H NMR spectrum of **12** (400 MHz, CDCl<sub>3</sub>)

cds-88. 2. fid

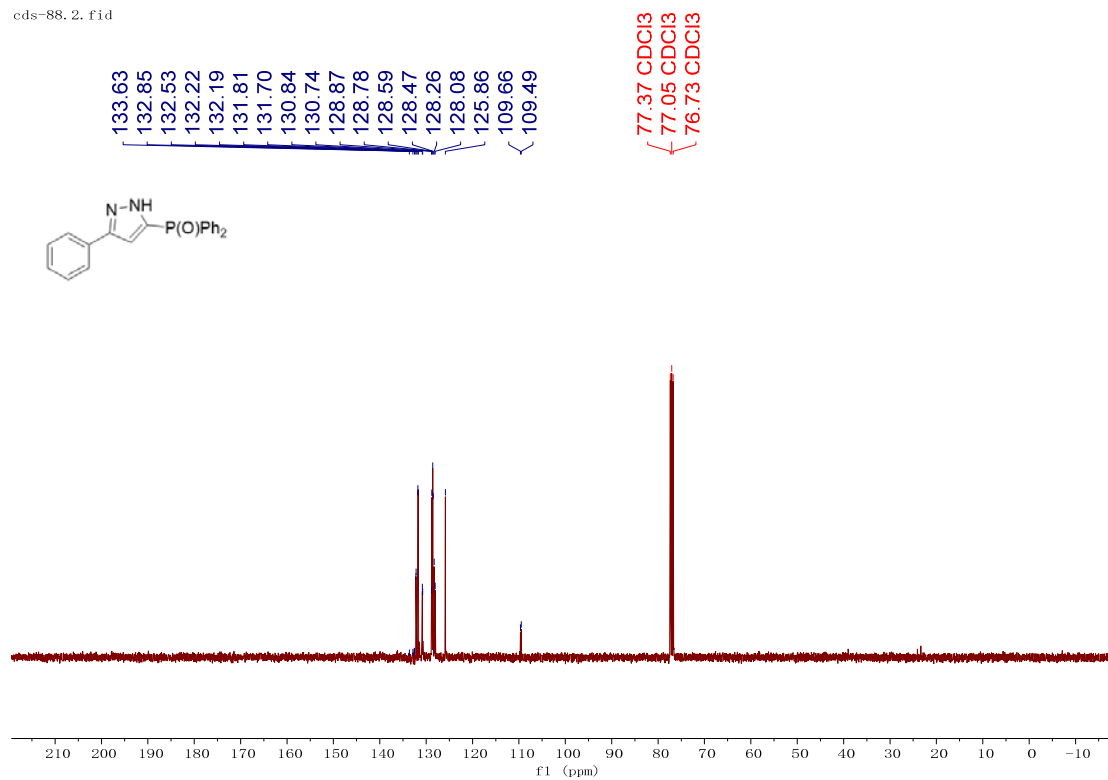

$^{13}\text{C}$  NMR spectrum of **12** (100 MHz,  $\text{CDCl}_3$ )

cds-88-1. 2. fid

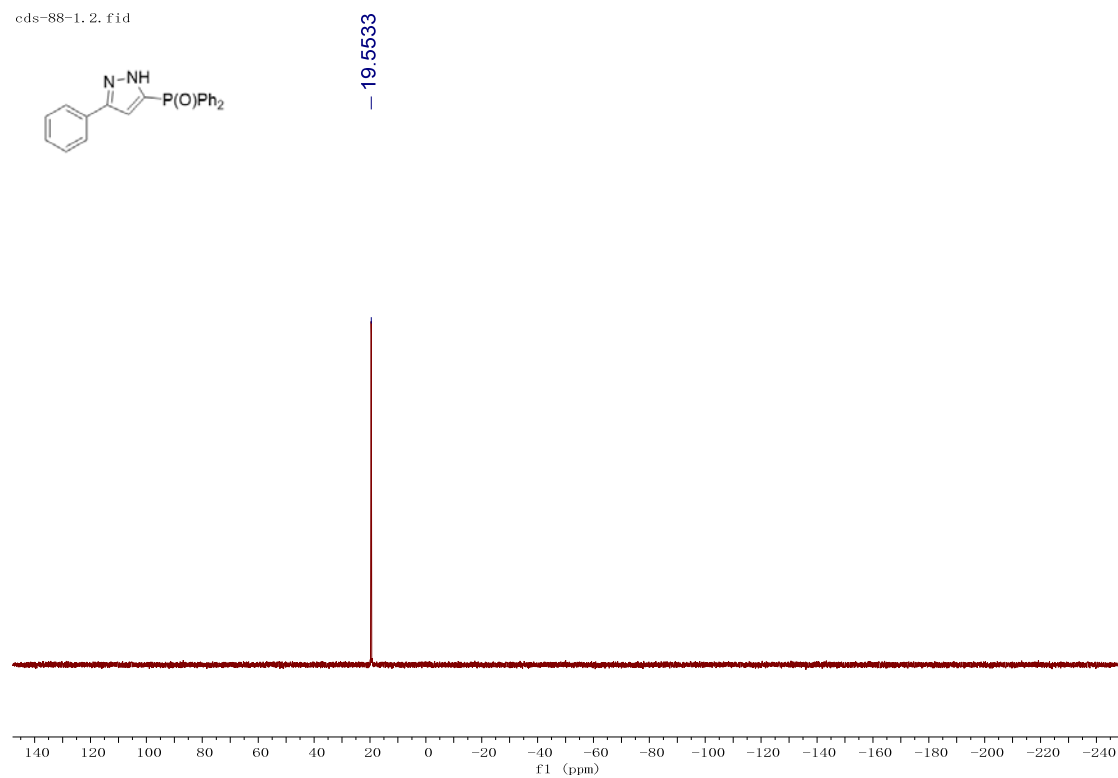

$^{31}\text{P}$  NMR spectrum of **12** (162 MHz,  $\text{CDCl}_3$ )
